# Supplementary material for: Planktonic foraminifera-derived environmental DNA extracted from abyssal sediments preserves patterns of plankton macroecology
Source: Copernicus journal article supplement (doi:10.5194/bg-14-2741-2017), 2017-06-06
Supplement: Supplementary file 1 [file bg-14-2741-2017-supplement.zip]

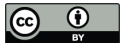

## *Supplement of*

# **Planktonic foraminifera-derived environmental DNA extracted from abyssal sediments preserves patterns of plankton macroecology**

**Raphaël Morard et al.**

*Correspondence to:* Raphael Morard (rmorard@marum.de)

- bg-14-2741-2017-supplement-title-page.pdf
- Supplement
  - Supplement 1
    - \* Supplement 1.xlsx
    - \* Supplement 1.xlsx
  - Supplement 2
    - \* Environmental ribotypes.txt
    - \* reference database.fasta
  - Supplement 3
    - \* Supplement 3.xlsx
    - \* Supplementary information 2.xlsx
  - Supplement 4
    - \* Alignements
    - \* Supplementary Information 4-a.png
    - \* Supplementary Information 4-b.png
    - \* trees
  - Supplement.zip

The copyright of individual parts of the supplement might differ from the CC BY 3.0 License.
