# Supplementary material for: Planktonic foraminifera-derived environmental DNA extracted from abyssal sediments preserves patterns of plankton macroecology
Source: Copernicus journal article supplement (doi:10.5194/bg-14-2741-2017), 2017-06-06
Supplement: Supplementary file 5 [file Supplement 3.xlsx]

## Sheet: Supplementary information 3
Ribotype information					ribotype occurences																															Attribution to reference database							Attribution by phylogenetic inference
ISU	NumSamples	TotalReads	Retained as e-ribotype	Name of the retained sequence	SFA10	SFA11	SFA12	SFA13	SFA14	SFA15	SFA16	SFA17	SFA18	SFA19	SFA20	SFA21	SFA22	SFA23	SFA24	SFA25	SFA26	SFA27	SFA28	SFA29	SFA2	SFA30	SFA31	SFA32	SFA33	SFA3	SFA4	SFA5	SFA7	SFA8	SFA9	minDist	Consensus	Level 1	Level 2	Level3	Level 4	Closest hit	Morphogroup	Genus	Morphospecies	Genotype	Taxonomic Path
ISU1	1	2	NO	-	0	0	0	0	2	0	0	0	0	0	0	0	0	0	0	0	0	0	0	0	0	0	0	0	0	0	0	0	0	0	0	6	Microperforates_Globigerinita_uvula	Microperforates	Globigerinita	uvula	-	FJ643298_Microperforates_Globigerinita_uvula_I_NA_NA;KM193160_Microperforates_Globigerinita_uvula_NA_NA_NA;KM193079_Microperforates_Globigerinita_uvula_NA_NA_NA;KM193075_Microperforates_Globigerinita_uvula_NA_NA_NA;KM193070_Microperforates_Globigerinita_uvula_NA_NA_NA;	-	-	-	-	-
ISU10	1	2	NO	-	0	0	0	0	0	0	0	0	0	0	0	0	0	2	0	0	0	0	0	0	0	0	0	0	0	0	0	0	0	0	0	6	Spinose_Globigerina_bulloides_II	Spinose	Globigerina	bulloides	II	KM193333_Spinose_Globigerina_bulloides_II_a_NA;AF250106_Spinose_Globigerina_bulloides_II_d_NA;KM193474_Spinose_Globigerina_bulloides_II_b_NA;GQ293069_Spinose_Globigerina_bulloides_II_f_NA;KM193709_Spinose_Globigerina_bulloides_II_c_NA;KM193700_Spinose_Globigerina_bulloides_II_a_NA;AF250111_Spinose_Globigerina_bulloides_II_c_NA;KM193605_Spinose_Globigerina_bulloides_II_a_NA	-	-	-	-	-
ISU100	1	2	NO	-	0	0	0	0	0	2	0	0	0	0	0	0	0	0	0	0	0	0	0	0	0	0	0	0	0	0	0	0	0	0	0	4	Microperforates_Globigerinita_uvula	Microperforates	Globigerinita	uvula	-	FJ643298_Microperforates_Globigerinita_uvula_I_NA_NA;KM193079_Microperforates_Globigerinita_uvula_NA_NA_NA;KM193070_Microperforates_Globigerinita_uvula_NA_NA_NA;	-	-	-	-	-
ISU1000	1	2	NO	-	0	0	0	0	0	0	0	0	0	0	0	2	0	0	0	0	0	0	0	0	0	0	0	0	0	0	0	0	0	0	0	2	Non-Spinose_Neogloboquadrina_pachyderma_I_NA_NA	Non-Spinose	Neogloboquadrina	pachyderma	I	NAAY305329_Non-Spinose_Neogloboquadrina_pachyderma_I_NA_NA;	-	-	-	-	-
ISU1001	2	6	Yes	R-561_2_6_6	0	0	0	0	0	4	0	0	0	0	0	0	0	0	0	0	0	0	0	2	0	0	0	0	0	0	0	0	0	0	0	6	Microperforates_Globigerinita_uvula	Microperforates	Globigerinita	uvula	-	FJ643298_Microperforates_Globigerinita_uvula_I_NA_NA;KM193079_Microperforates_Globigerinita_uvula_NA_NA_NA;KM193070_Microperforates_Globigerinita_uvula_NA_NA_NA;	Microperforates	Globigerinita	glutinata	I	Microperforates_Globigerinita_glutinata_I
ISU1002	2	6	Yes	R-596_2_6_4	0	0	0	0	0	3	0	0	0	0	0	0	0	0	0	0	0	0	0	0	0	3	0	0	0	0	0	0	0	0	0	4	Microperforates_Globigerinita_glutinata	Microperforates	Globigerinita	glutinata	-	FJ643286_Microperforates_Globigerinita_glutinata_I_NA_NA;KM193484_Microperforates_Globigerinita_glutinata_NA_NA_NA	Microperforates	Globigerinita	glutinata	I	Microperforates_Globigerinita_glutinata_I
ISU1003	1	3	NO	-	0	0	0	0	0	0	0	0	0	0	0	0	0	0	0	0	0	0	0	0	0	0	0	0	0	0	0	0	3	0	0	1	Non-Spinose_Neogloboquadrina_pachyderma_IV_NA_NA	Non-Spinose	Neogloboquadrina	pachyderma	IV	NAKM193680_Non-Spinose_Neogloboquadrina_pachyderma_IV_NA_NA;	-	-	-	-	-
ISU1004	1	4	NO	-	0	0	0	0	0	0	0	0	0	0	0	0	0	0	0	0	0	0	0	4	0	0	0	0	0	0	0	0	0	0	0	1	Microperforates_Candeina_nitida_NA_NA_NA	Microperforates	Candeina	nitida	NA	NAAB263435_Microperforates_Candeina_nitida_NA_NA_NA;	-	-	-	-	-
ISU1005	5	52	Yes	R-181_5_52_1	0	0	0	0	3	14	0	0	0	0	0	0	0	0	0	0	0	0	12	9	0	14	0	0	0	0	0	0	0	0	0	1	Microperforates_Globigerinita_glutinata_III_NA_NA	Microperforates	Globigerinita	glutinata	III	NAFJ643283_Microperforates_Globigerinita_glutinata_III_NA_NA;	Microperforates	Globigerinita	glutinata	III	Microperforates_Globigerinita_glutinata_III
ISU1006	1	2	NO	-	0	0	0	0	0	0	0	0	0	0	0	0	0	0	0	0	0	0	0	0	0	2	0	0	0	0	0	0	0	0	0	1	Microperforates_Globigerinita_glutinata	Microperforates	Globigerinita	glutinata	-	FJ643296_Microperforates_Globigerinita_glutinata_III_NA_NA;JQ799900_Microperforates_Globigerinita_glutinata_IV_NA_NA;KM193199_Microperforates_Globigerinita_glutinata_NA_NA_NA;AY453136_Microperforates_Globigerinita_glutinata_III_NA_NA	-	-	-	-	-
ISU1007	1	2	NO	-	0	0	0	0	0	2	0	0	0	0	0	0	0	0	0	0	0	0	0	0	0	0	0	0	0	0	0	0	0	0	0	7	Microperforates_Globigerinita_uvula	Microperforates	Globigerinita	uvula	-	FJ643298_Microperforates_Globigerinita_uvula_I_NA_NA;KM193079_Microperforates_Globigerinita_uvula_NA_NA_NA;KM193070_Microperforates_Globigerinita_uvula_NA_NA_NA;	-	-	-	-	-
ISU1008	1	2	NO	-	0	0	0	0	0	0	0	0	0	0	0	0	0	0	0	0	0	0	0	0	0	0	0	0	0	0	0	0	2	0	0	1	Non-Spinose_Neogloboquadrina_pachyderma_IV_NA_NA	Non-Spinose	Neogloboquadrina	pachyderma	IV	NAKM193680_Non-Spinose_Neogloboquadrina_pachyderma_IV_NA_NA;	-	-	-	-	-
ISU1009	1	2	NO	-	0	0	0	0	0	0	0	0	0	0	0	0	0	0	0	0	0	0	0	0	0	2	0	0	0	0	0	0	0	0	0	3	Microperforates_Globigerinita_glutinata	Microperforates	Globigerinita	glutinata	-	KM193497_Microperforates_Globigerinita_glutinata_NA_NA_NA;FJ643294_Microperforates_Globigerinita_glutinata_I_NA_NA;KM193151_Microperforates_Globigerinita_glutinata_NA_NA_NA;	-	-	-	-	-
ISU101	5	66	Yes	R-160_5_66_1	0	0	0	0	5	22	0	0	0	0	0	0	0	0	0	0	0	0	8	15	0	16	0	0	0	0	0	0	0	0	0	1	Microperforates_Globigerinita_glutinata_III_NA_NA	Microperforates	Globigerinita	glutinata	III	NAFJ643283_Microperforates_Globigerinita_glutinata_III_NA_NA;	Microperforates	Globigerinita	glutinata	III	Microperforates_Globigerinita_glutinata_III
ISU1010	3	211	Yes	R-74_3_211_1	0	0	0	0	3	204	0	0	0	0	0	0	0	0	0	0	0	0	0	4	0	0	0	0	0	0	0	0	0	0	0	1	Microperforates_Globigerinita_uvula	Microperforates	Globigerinita	uvula	-	KM193070_Microperforates_Globigerinita_uvula_NA_NA_NA;FJ643298_Microperforates_Globigerinita_uvula_I_NA_NA	Microperforates	Globigerinita	uvula	I	Microperforates_Globigerinita_uvula_I
ISU1011	7	400	Yes	R-43_7_400_2	0	0	0	3	27	138	0	0	0	3	0	0	0	0	0	0	0	0	69	89	0	71	0	0	0	0	0	0	0	0	0	2	Microperforates_Globigerinita_glutinata	Microperforates	Globigerinita	glutinata	-	FJ643296_Microperforates_Globigerinita_glutinata_III_NA_NA;KM193303_Microperforates_Globigerinita_glutinata_NA_NA_NA;AY453136_Microperforates_Globigerinita_glutinata_III_NA_NA;KM193199_Microperforates_Globigerinita_glutinata_NA_NA_NA;FJ643277_Microperforates_Globigerinita_glutinata_III_NA_NA;JQ799900_Microperforates_Globigerinita_glutinata_IV_NA_NA;FJ643288_Microperforates_Globigerinita_glutinata…	Microperforates	Globigerinita	glutinata	III	Microperforates_Globigerinita_glutinata_III
ISU1012	1	2	NO	-	0	0	0	0	0	2	0	0	0	0	0	0	0	0	0	0	0	0	0	0	0	0	0	0	0	0	0	0	0	0	0	6	Microperforates_Globigerinita_glutinata	Microperforates	Globigerinita	glutinata	-	FJ643286_Microperforates_Globigerinita_glutinata_I_NA_NA;KM193484_Microperforates_Globigerinita_glutinata_NA_NA_NA	-	-	-	-	-
ISU1013	3	7	Yes	R-522_3_7_1	2	2	0	0	0	0	0	0	0	0	0	0	0	0	0	0	0	0	0	0	0	0	0	0	0	0	0	0	0	0	3	1	Microperforates_Globigerinita_uvula	Microperforates	Globigerinita	uvula	-	KM193181_Microperforates_Globigerinita_uvula_NA_NA_NA;AF387173_Microperforates_Globigerinita_uvula_II_NA_NA;KM194324_Microperforates_Globigerinita_uvula_NA_NA_NA;	Microperforates	Globigerinita	uvula	II	Microperforates_Globigerinita_uvula_II
ISU1014	1	2	NO	-	0	0	0	0	0	0	0	0	0	0	0	0	0	0	0	0	0	0	0	0	0	0	0	0	0	0	0	0	2	0	0	1	Non-Spinose_Neogloboquadrina_pachyderma_IV_NA_NA	Non-Spinose	Neogloboquadrina	pachyderma	IV	NAKM193680_Non-Spinose_Neogloboquadrina_pachyderma_IV_NA_NA;	-	-	-	-	-
ISU1015	5	71	Yes	R-151_5_71_1	0	0	0	0	8	12	0	0	0	0	0	0	0	0	0	0	0	0	7	17	0	27	0	0	0	0	0	0	0	0	0	1	Microperforates_Globigerinita_glutinata_III_NA_NA	Microperforates	Globigerinita	glutinata	III	NAFJ643283_Microperforates_Globigerinita_glutinata_III_NA_NA;	Microperforates	Globigerinita	glutinata	III	Microperforates_Globigerinita_glutinata_III
ISU1016	1	26	Yes	R-284_1_26_6	0	0	0	0	0	26	0	0	0	0	0	0	0	0	0	0	0	0	0	0	0	0	0	0	0	0	0	0	0	0	0	6	Microperforates_Globigerinita_uvula	Microperforates	Globigerinita	uvula	-	FJ643298_Microperforates_Globigerinita_uvula_I_NA_NA;KM193079_Microperforates_Globigerinita_uvula_NA_NA_NA;KM193070_Microperforates_Globigerinita_uvula_NA_NA_NA;	Microperforates	Globigerinita	uvula	I	Microperforates_Globigerinita_uvula_I
ISU1017	2	4	Yes	R-683_2_4_2	0	0	0	0	0	0	0	0	0	0	0	0	0	0	0	0	0	0	2	0	0	2	0	0	0	0	0	0	0	0	0	2	Microperforates_Globigerinita_glutinata	Microperforates	Globigerinita	glutinata	-	FJ643286_Microperforates_Globigerinita_glutinata_I_NA_NA;KM193484_Microperforates_Globigerinita_glutinata_NA_NA_NA	Microperforates	Globigerinita	glutinata	III	Microperforates_Globigerinita_glutinata_III
ISU1018	5	42	Yes	R-219_5_42_1	0	0	0	0	2	13	0	0	0	0	0	0	0	0	0	0	0	0	11	9	0	7	0	0	0	0	0	0	0	0	0	1	Microperforates_Globigerinita_glutinata_III_NA_NA	Microperforates	Globigerinita	glutinata	III	NAFJ643283_Microperforates_Globigerinita_glutinata_III_NA_NA;	Microperforates	Globigerinita	glutinata	III	Microperforates_Globigerinita_glutinata_III
ISU1019	6	45	Yes	R-206_6_45_1	0	0	0	2	3	10	0	0	0	0	0	0	0	0	0	0	0	0	8	10	0	12	0	0	0	0	0	0	0	0	0	1	Microperforates_Globigerinita_glutinata	Microperforates	Globigerinita	glutinata	-	FJ643296_Microperforates_Globigerinita_glutinata_III_NA_NA;AY453136_Microperforates_Globigerinita_glutinata_III_NA_NA;KM193199_Microperforates_Globigerinita_glutinata_NA_NA_NA;FJ643277_Microperforates_Globigerinita_glutinata_III_NA_NA;JQ799900_Microperforates_Globigerinita_glutinata_IV_NA_NA;	Microperforates	Globigerinita	glutinata	III	Microperforates_Globigerinita_glutinata_III
ISU102	1	2	NO	-	0	0	0	0	0	2	0	0	0	0	0	0	0	0	0	0	0	0	0	0	0	0	0	0	0	0	0	0	0	0	0	1	Microperforates_Globigerinita_glutinata	Microperforates	Globigerinita	glutinata	-	FJ643418_Microperforates_Globigerinita_glutinata_NA_NA_NA;AB468829_Microperforates_Globigerinita_glutinata_II_NA_NA	-	-	-	-	-
ISU1020	1	2	NO	-	0	0	0	0	0	2	0	0	0	0	0	0	0	0	0	0	0	0	0	0	0	0	0	0	0	0	0	0	0	0	0	2	Non-Spiral_Galietelia_vivans_NA_NA_NA	Non-Spiral	Galietelia	vivans	NA	NAAB364519_Non-Spiral_Galietelia_vivans_NA_NA_NA;AB364517_Non-Spiral_Galietelia_vivans_NA_NA_NA;AB364518_Non-Spiral_Galietelia_vivans_NA_NA_NA;	-	-	-	-	-
ISU1021	1	7	NO	-	7	0	0	0	0	0	0	0	0	0	0	0	0	0	0	0	0	0	0	0	0	0	0	0	0	0	0	0	0	0	0	1	Microperforates_Globigerinita_uvula	Microperforates	Globigerinita	uvula	-	KM193181_Microperforates_Globigerinita_uvula_NA_NA_NA;KM193691_Microperforates_Globigerinita_uvula_NA_NA_NA;KM193364_Microperforates_Globigerinita_uvula_NA_NA_NA;AF387173_Microperforates_Globigerinita_uvula_II_NA_NA;KM194324_Microperforates_Globigerinita_uvula_NA_NA_NA;	-	-	-	-	-
ISU1022	2	4	Yes	R-664_2_4_7	0	0	0	0	2	0	0	0	0	0	0	0	0	0	0	0	0	0	0	0	0	2	0	0	0	0	0	0	0	0	0	7	Microperforates_Globigerinita_uvula	Microperforates	Globigerinita	uvula	-	FJ643298_Microperforates_Globigerinita_uvula_I_NA_NA;KM193160_Microperforates_Globigerinita_uvula_NA_NA_NA;KM193079_Microperforates_Globigerinita_uvula_NA_NA_NA;KM193075_Microperforates_Globigerinita_uvula_NA_NA_NA;KM193070_Microperforates_Globigerinita_uvula_NA_NA_NA;	Microperforates	Globigerinita	uvula	I	Microperforates_Globigerinita_uvula_I
ISU1023	1	2	NO	-	0	0	0	0	0	2	0	0	0	0	0	0	0	0	0	0	0	0	0	0	0	0	0	0	0	0	0	0	0	0	0	5	Microperforates_Globigerinita_uvula	Microperforates	Globigerinita	uvula	-	FJ643298_Microperforates_Globigerinita_uvula_I_NA_NA;KM193079_Microperforates_Globigerinita_uvula_NA_NA_NA;KM193070_Microperforates_Globigerinita_uvula_NA_NA_NA;	-	-	-	-	-
ISU1024	2	7	Yes	R-546_2_7_4	0	0	0	0	0	3	0	0	0	0	0	0	0	0	0	0	0	0	0	0	0	4	0	0	0	0	0	0	0	0	0	4	Microperforates_Globigerinita_glutinata	Microperforates	Globigerinita	glutinata	-	FJ643286_Microperforates_Globigerinita_glutinata_I_NA_NA;KM193484_Microperforates_Globigerinita_glutinata_NA_NA_NA	Microperforates	Globigerinita	glutinata	I	Microperforates_Globigerinita_glutinata_I
ISU1025	1	3	NO	-	0	0	0	0	0	3	0	0	0	0	0	0	0	0	0	0	0	0	0	0	0	0	0	0	0	0	0	0	0	0	0	1	Microperforates_Candeina_nitida_NA_NA_NA	Microperforates	Candeina	nitida	NA	NAAB263435_Microperforates_Candeina_nitida_NA_NA_NA;	-	-	-	-	-
ISU1026	2	6	Yes	R-588_2_6_1	0	0	0	0	3	3	0	0	0	0	0	0	0	0	0	0	0	0	0	0	0	0	0	0	0	0	0	0	0	0	0	1	Microperforates_Globigerinita_glutinata	Microperforates	Globigerinita	glutinata	-	FJ643296_Microperforates_Globigerinita_glutinata_III_NA_NA;KM193199_Microperforates_Globigerinita_glutinata_NA_NA_NA;FJ643277_Microperforates_Globigerinita_glutinata_III_NA_NA;AY453136_Microperforates_Globigerinita_glutinata_III_NA_NA;JQ799900_Microperforates_Globigerinita_glutinata_IV_NA_NA;	Microperforates	Globigerinita	glutinata	III	Microperforates_Globigerinita_glutinata_III
ISU1027	6	5368	Yes	R-12_6_5368_0	0	0	0	0	390	1144	0	0	2	0	0	0	0	0	0	0	0	0	1079	1247	0	1506	0	0	0	0	0	0	0	0	0	0	Microperforates_Globigerinita_glutinata_III_NA_NA	Microperforates	Globigerinita	glutinata	III	NAFJ643277_Microperforates_Globigerinita_glutinata_III_NA_NA;	Microperforates	Globigerinita	glutinata	III	Microperforates_Globigerinita_glutinata_III
ISU1028	1	2	NO	-	0	0	0	0	0	0	0	0	0	0	0	0	0	0	0	0	0	0	0	2	0	0	0	0	0	0	0	0	0	0	0	1	Microperforates_Globigerinita_glutinata_III_NA_NA	Microperforates	Globigerinita	glutinata	III	NAFJ643277_Microperforates_Globigerinita_glutinata_III_NA_NA;	-	-	-	-	-
ISU1029	1	3	NO	-	0	0	0	0	0	3	0	0	0	0	0	0	0	0	0	0	0	0	0	0	0	0	0	0	0	0	0	0	0	0	0	1	Microperforates_Globigerinita_uvula	Microperforates	Globigerinita	uvula	-	FJ643298_Microperforates_Globigerinita_uvula_I_NA_NA;KM193070_Microperforates_Globigerinita_uvula_NA_NA_NA;KM193079_Microperforates_Globigerinita_uvula_NA_NA_NA;	-	-	-	-	-
ISU103	1	2	NO	-	2	0	0	0	0	0	0	0	0	0	0	0	0	0	0	0	0	0	0	0	0	0	0	0	0	0	0	0	0	0	0	1	Microperforates_Globigerinita_uvula	Microperforates	Globigerinita	uvula	-	KM193181_Microperforates_Globigerinita_uvula_NA_NA_NA;KM193691_Microperforates_Globigerinita_uvula_NA_NA_NA;KM193364_Microperforates_Globigerinita_uvula_NA_NA_NA;AF387173_Microperforates_Globigerinita_uvula_II_NA_NA;KM194324_Microperforates_Globigerinita_uvula_NA_NA_NA;	-	-	-	-	-
ISU1030	1	4	NO	-	0	0	0	0	0	0	0	0	0	0	0	0	0	0	0	0	0	0	0	0	0	0	0	0	0	0	0	0	4	0	0	1	Non-Spinose_Neogloboquadrina_pachyderma_IV_NA_NA	Non-Spinose	Neogloboquadrina	pachyderma	IV	NAKM193550_Non-Spinose_Neogloboquadrina_pachyderma_IV_NA_NA;KM193530_Non-Spinose_Neogloboquadrina_pachyderma_IV_NA_NA;KM193284_Non-Spinose_Neogloboquadrina_pachyderma_IV_NA_NA;KM193861_Non-Spinose_Neogloboquadrina_pachyderma_IV_NA_NA;KM193614_Non-Spinose_Neogloboquadrina_pachyderma_IV_NA_NA;KM193889_Non-Spinose_Neogloboquadrina_pachyderma_IV_NA_NA;KM193556_Non-Spinose_Neogloboquadrina_pachyderma_…	-	-	-	-	-
ISU1031	1	2	NO	-	0	0	0	0	0	0	0	0	0	0	0	0	0	0	0	0	0	0	0	0	0	2	0	0	0	0	0	0	0	0	0	1	Spinose_Globigerina_bulloides	Spinose	Globigerina	bulloides	-	GQ293072_Spinose_Globigerina_bulloides_I_c_NA;GU060421_Spinose_Globigerina_bulloides_I_e_NA;GQ293070_Spinose_Globigerina_bulloides_I_d_NA;Z83957_Spinose_Globigerina_bulloides_NA_NA_NA	-	-	-	-	-
ISU1032	1	2	NO	-	0	0	0	0	0	0	0	0	0	0	0	0	0	0	0	0	0	0	2	0	0	0	0	0	0	0	0	0	0	0	0	1	Microperforates_Globigerinita_glutinata	Microperforates	Globigerinita	glutinata	-	JQ799900_Microperforates_Globigerinita_glutinata_IV_NA_NA;FJ643296_Microperforates_Globigerinita_glutinata_III_NA_NA;FJ643277_Microperforates_Globigerinita_glutinata_III_NA_NA;KM193199_Microperforates_Globigerinita_glutinata_NA_NA_NA;AY453136_Microperforates_Globigerinita_glutinata_III_NA_NA;	-	-	-	-	-
ISU1033	1	2	NO	-	0	0	0	0	0	0	0	0	0	0	2	0	0	0	0	0	0	0	0	0	0	0	0	0	0	0	0	0	0	0	0	1	Non-Spinose_Neogloboquadrina_pachyderma_I_NA_NA	Non-Spinose	Neogloboquadrina	pachyderma	I	NAAY305329_Non-Spinose_Neogloboquadrina_pachyderma_I_NA_NA;	-	-	-	-	-
ISU1034	1	2	NO	-	0	0	0	0	0	0	0	0	0	0	0	0	0	0	0	0	0	0	0	2	0	0	0	0	0	0	0	0	0	0	0	5	Microperforates_Globigerinita_uvula	Microperforates	Globigerinita	uvula	-	FJ643298_Microperforates_Globigerinita_uvula_I_NA_NA;KM193160_Microperforates_Globigerinita_uvula_NA_NA_NA;KM193075_Microperforates_Globigerinita_uvula_NA_NA_NA;KM193070_Microperforates_Globigerinita_uvula_NA_NA_NA;KM193079_Microperforates_Globigerinita_uvula_NA_NA_NA;	-	-	-	-	-
ISU1035	1	2	NO	-	0	0	0	0	0	2	0	0	0	0	0	0	0	0	0	0	0	0	0	0	0	0	0	0	0	0	0	0	0	0	0	1	Microperforates_Globigerinita_glutinata_III_NA_NA	Microperforates	Globigerinita	glutinata	III	NAFJ643296_Microperforates_Globigerinita_glutinata_III_NA_NA;	-	-	-	-	-
ISU1036	4	37	Yes	R-231_4_37_1	0	0	0	0	0	16	0	0	0	0	0	0	0	0	0	0	0	0	3	9	0	9	0	0	0	0	0	0	0	0	0	1	Microperforates_Globigerinita_glutinata_III_NA_NA	Microperforates	Globigerinita	glutinata	III	NAFJ643283_Microperforates_Globigerinita_glutinata_III_NA_NA;	Microperforates	Globigerinita	glutinata	III	Microperforates_Globigerinita_glutinata_III
ISU1037	2	361	Yes	R-47_2_361_4	0	0	0	0	359	0	0	0	0	0	0	0	0	0	0	0	0	0	0	2	0	0	0	0	0	0	0	0	0	0	0	4	Microperforates_Globigerinita_glutinata	Microperforates	Globigerinita	glutinata	-	KM193484_Microperforates_Globigerinita_glutinata_NA_NA_NA;FJ643286_Microperforates_Globigerinita_glutinata_I_NA_NA	Microperforates	Globigerinita	glutinata	I	Microperforates_Globigerinita_glutinata_I
ISU1038	5	70	Yes	R-153_5_70_1	0	0	0	0	10	23	0	0	0	0	0	0	0	0	0	0	0	0	9	21	0	7	0	0	0	0	0	0	0	0	0	1	Microperforates_Globigerinita_glutinata_III_NA_NA	Microperforates	Globigerinita	glutinata	III	NAFJ643283_Microperforates_Globigerinita_glutinata_III_NA_NA;	Microperforates	Globigerinita	glutinata	III	Microperforates_Globigerinita_glutinata_III
ISU1039	4	16	Yes	R-366_4_16_1	0	0	0	0	0	3	0	0	0	0	0	0	0	0	0	0	0	0	2	7	0	4	0	0	0	0	0	0	0	0	0	1	Microperforates_Globigerinita_glutinata	Microperforates	Globigerinita	glutinata	-	JQ799900_Microperforates_Globigerinita_glutinata_IV_NA_NA;FJ643296_Microperforates_Globigerinita_glutinata_III_NA_NA;KM193199_Microperforates_Globigerinita_glutinata_NA_NA_NA;AY453136_Microperforates_Globigerinita_glutinata_III_NA_NA	Microperforates	Globigerinita	glutinata	III	Microperforates_Globigerinita_glutinata_III
ISU104	4	15	Yes	R-379_4_15_1	0	0	0	0	0	6	0	0	0	0	0	0	0	0	0	0	0	0	2	3	0	4	0	0	0	0	0	0	0	0	0	1	Microperforates_Globigerinita_glutinata	Microperforates	Globigerinita	glutinata	-	JQ799900_Microperforates_Globigerinita_glutinata_IV_NA_NA;FJ643296_Microperforates_Globigerinita_glutinata_III_NA_NA;KM193199_Microperforates_Globigerinita_glutinata_NA_NA_NA;AY453136_Microperforates_Globigerinita_glutinata_III_NA_NA	Microperforates	Globigerinita	glutinata	III	Microperforates_Globigerinita_glutinata_III
ISU1040	2	6	Yes	R-557_2_6_1	0	0	0	0	0	0	0	0	0	0	0	0	0	0	0	0	0	0	0	3	0	3	0	0	0	0	0	0	0	0	0	1	Microperforates_Globigerinita_glutinata_III_NA_NA	Microperforates	Globigerinita	glutinata	III	NAFJ643296_Microperforates_Globigerinita_glutinata_III_NA_NA;	Microperforates	Globigerinita	uvula	I	Microperforates_Globigerinita_uvula_I
ISU1041	2	4	Yes	R-659_2_4_7	0	0	0	0	2	2	0	0	0	0	0	0	0	0	0	0	0	0	0	0	0	0	0	0	0	0	0	0	0	0	0	7	Microperforates_Globigerinita_uvula	Microperforates	Globigerinita	uvula	-	FJ643298_Microperforates_Globigerinita_uvula_I_NA_NA;KM193160_Microperforates_Globigerinita_uvula_NA_NA_NA;KM193079_Microperforates_Globigerinita_uvula_NA_NA_NA;KM193075_Microperforates_Globigerinita_uvula_NA_NA_NA;KM193070_Microperforates_Globigerinita_uvula_NA_NA_NA;	Microperforates	Globigerinita	glutinata	III	Microperforates_Globigerinita_glutinata_III
ISU1042	1	35	Yes	R-240_1_35_9	0	0	35	0	0	0	0	0	0	0	0	0	0	0	0	0	0	0	0	0	0	0	0	0	0	0	0	0	0	0	0	9	Non-Spiral_Galietelia_vivans_NA_NA_NA	Non-Spiral	Galietelia	vivans	NA	NAAB364519_Non-Spiral_Galietelia_vivans_NA_NA_NA;AB364517_Non-Spiral_Galietelia_vivans_NA_NA_NA;AB364518_Non-Spiral_Galietelia_vivans_NA_NA_NA;	Unidentified	Gallitellia	vivans	U1	Unidentified_Gallitellia_vivans_U1
ISU1043	1	2	NO	-	0	0	0	2	0	0	0	0	0	0	0	0	0	0	0	0	0	0	0	0	0	0	0	0	0	0	0	0	0	0	0	9	Microperforates_Globigerinita_glutinata	Microperforates	Globigerinita	glutinata	-	AB468829_Microperforates_Globigerinita_glutinata_II_NA_NA;KM194025_Microperforates_Globigerinita_glutinata_NA_NA_NA;AB468827_Microperforates_Globigerinita_glutinata_II_NA_NA;FJ643418_Microperforates_Globigerinita_glutinata_NA_NA_NA;AB468826_Microperforates_Globigerinita_glutinata_II_NA_NA;AB468833_Microperforates_Globigerinita_glutinata_II_NA_NA	-	-	-	-	-
ISU1044	1	3	NO	-	0	0	0	0	0	3	0	0	0	0	0	0	0	0	0	0	0	0	0	0	0	0	0	0	0	0	0	0	0	0	0	1	Monolamellar_Hastigerina_pelagica	Monolamellar	Hastigerina	pelagica	-	FJ643408_Monolamellar_Hastigerina_pelagica_II_a_NA;KM194103_Monolamellar_Hastigerina_pelagica_NA_NA_NA;FJ643367_Monolamellar_Hastigerina_pelagica_II_a_NA;FJ643402_Monolamellar_Hastigerina_pelagica_NA_NA_NA	-	-	-	-	-
ISU1045	1	2	NO	-	0	0	0	0	0	0	0	0	0	0	0	0	0	0	0	0	0	0	0	0	0	2	0	0	0	0	0	0	0	0	0	1	Microperforates_Globigerinita_glutinata_III_NA_NA	Microperforates	Globigerinita	glutinata	III	NAFJ643283_Microperforates_Globigerinita_glutinata_III_NA_NA;	-	-	-	-	-
ISU1046	4	89	Yes	R-131_4_89_1	0	0	0	0	0	77	0	0	0	0	0	0	0	0	0	0	0	0	3	2	0	7	0	0	0	0	0	0	0	0	0	1	Microperforates_Globigerinita_glutinata	Microperforates	Globigerinita	glutinata	-	JQ799900_Microperforates_Globigerinita_glutinata_IV_NA_NA;FJ643296_Microperforates_Globigerinita_glutinata_III_NA_NA;KM193199_Microperforates_Globigerinita_glutinata_NA_NA_NA;AY453136_Microperforates_Globigerinita_glutinata_III_NA_NA	Microperforates	Globigerinita	glutinata	III	Microperforates_Globigerinita_glutinata_III
ISU1047	1	2	NO	-	0	0	0	0	0	0	0	0	0	0	0	0	0	0	0	0	0	0	0	0	0	0	0	0	0	0	0	0	2	0	0	1	Non-Spinose_Neogloboquadrina_pachyderma_IV_NA_NA	Non-Spinose	Neogloboquadrina	pachyderma	IV	NAKM193550_Non-Spinose_Neogloboquadrina_pachyderma_IV_NA_NA;KM193530_Non-Spinose_Neogloboquadrina_pachyderma_IV_NA_NA;KM193284_Non-Spinose_Neogloboquadrina_pachyderma_IV_NA_NA;KM193861_Non-Spinose_Neogloboquadrina_pachyderma_IV_NA_NA;KM193614_Non-Spinose_Neogloboquadrina_pachyderma_IV_NA_NA;KM193889_Non-Spinose_Neogloboquadrina_pachyderma_IV_NA_NA;KM193556_Non-Spinose_Neogloboquadrina_pachyderma_…	-	-	-	-	-
ISU1048	5	3720	Yes	R-19_5_3720_1	0	0	0	167	0	690	0	0	0	0	0	0	0	0	0	0	0	0	742	386	0	1735	0	0	0	0	0	0	0	0	0	1	Microperforates_Globigerinita_glutinata	Microperforates	Globigerinita	glutinata	-	FJ643286_Microperforates_Globigerinita_glutinata_I_NA_NA;KM193484_Microperforates_Globigerinita_glutinata_NA_NA_NA	Microperforates	Globigerinita	glutinata	I	Microperforates_Globigerinita_glutinata_I
ISU1049	2	6	Yes	R-595_2_6_1	0	0	0	0	0	0	0	0	0	0	0	0	0	0	0	0	0	0	0	4	0	2	0	0	0	0	0	0	0	0	0	1	Microperforates_Globigerinita_glutinata	Microperforates	Globigerinita	glutinata	-	JQ799900_Microperforates_Globigerinita_glutinata_IV_NA_NA;FJ643296_Microperforates_Globigerinita_glutinata_III_NA_NA;KM193199_Microperforates_Globigerinita_glutinata_NA_NA_NA;AY453136_Microperforates_Globigerinita_glutinata_III_NA_NA	Microperforates	Globigerinita	glutinata	III	Microperforates_Globigerinita_glutinata_III
ISU105	7	80	Yes	R-141_7_80_2	0	0	0	3	7	15	0	0	0	3	0	0	0	0	0	0	0	0	11	26	0	15	0	0	0	0	0	0	0	0	0	2	Microperforates_Candeina_nitida_NA_NA_NA	Microperforates	Candeina	nitida	NA	NAAB263435_Microperforates_Candeina_nitida_NA_NA_NA;AB468836_Microperforates_Candeina_nitida_NA_NA_NA;KJ633212_Microperforates_Candeina_nitida_NA_NA_NA;AB468837_Microperforates_Candeina_nitida_NA_NA_NA	Microperforates	Candeina	nitida	I	Microperforates_Candeina_nitida_I
ISU1050	1	2	NO	-	2	0	0	0	0	0	0	0	0	0	0	0	0	0	0	0	0	0	0	0	0	0	0	0	0	0	0	0	0	0	0	1	Microperforates_Globigerinita_uvula	Microperforates	Globigerinita	uvula	-	KM193181_Microperforates_Globigerinita_uvula_NA_NA_NA;KM193691_Microperforates_Globigerinita_uvula_NA_NA_NA;KM193364_Microperforates_Globigerinita_uvula_NA_NA_NA;AF387173_Microperforates_Globigerinita_uvula_II_NA_NA;KM194324_Microperforates_Globigerinita_uvula_NA_NA_NA;	-	-	-	-	-
ISU1051	5	30	Yes	R-260_5_30_1	0	0	0	0	2	10	0	0	0	0	0	0	0	0	0	0	0	0	6	5	0	7	0	0	0	0	0	0	0	0	0	1	Microperforates_Globigerinita_glutinata_III_NA_NA	Microperforates	Globigerinita	glutinata	III	NAFJ643283_Microperforates_Globigerinita_glutinata_III_NA_NA;	Microperforates	Globigerinita	glutinata	III	Microperforates_Globigerinita_glutinata_III
ISU1052	1	10	Yes	R-451_1_10_5	0	0	0	0	0	0	0	0	0	0	0	0	0	10	0	0	0	0	0	0	0	0	0	0	0	0	0	0	0	0	0	5	Spinose_Globigerina_bulloides_II	Spinose	Globigerina	bulloides	II	KM193333_Spinose_Globigerina_bulloides_II_a_NA;AF250106_Spinose_Globigerina_bulloides_II_d_NA;KM193474_Spinose_Globigerina_bulloides_II_b_NA;GQ293069_Spinose_Globigerina_bulloides_II_f_NA;KM193709_Spinose_Globigerina_bulloides_II_c_NA;KM193700_Spinose_Globigerina_bulloides_II_a_NA;AF250111_Spinose_Globigerina_bulloides_II_c_NA;KM193605_Spinose_Globigerina_bulloides_II_a_NA	Spinose	Globigerina	bulloides	II	Spinose_Globigerina_bulloides_II
ISU1053	5	28	Yes	R-272_5_28_1	0	0	0	0	2	7	0	0	0	0	0	0	0	0	0	0	0	0	4	4	0	11	0	0	0	0	0	0	0	0	0	1	Microperforates_Globigerinita_glutinata	Microperforates	Globigerinita	glutinata	-	FJ643296_Microperforates_Globigerinita_glutinata_III_NA_NA;AY453136_Microperforates_Globigerinita_glutinata_III_NA_NA;KM193199_Microperforates_Globigerinita_glutinata_NA_NA_NA;JQ799900_Microperforates_Globigerinita_glutinata_IV_NA_NA	Microperforates	Globigerinita	glutinata	III	Microperforates_Globigerinita_glutinata_III
ISU1054	1	7	NO	-	7	0	0	0	0	0	0	0	0	0	0	0	0	0	0	0	0	0	0	0	0	0	0	0	0	0	0	0	0	0	0	1	Microperforates_Globigerinita_uvula	Microperforates	Globigerinita	uvula	-	KM193181_Microperforates_Globigerinita_uvula_NA_NA_NA;KM193691_Microperforates_Globigerinita_uvula_NA_NA_NA;KM193364_Microperforates_Globigerinita_uvula_NA_NA_NA;AF387173_Microperforates_Globigerinita_uvula_II_NA_NA;KM194324_Microperforates_Globigerinita_uvula_NA_NA_NA;	-	-	-	-	-
ISU1055	5	69	Yes	R-156_5_69_1	0	0	0	0	3	14	0	0	0	0	0	0	0	0	0	0	0	0	13	16	0	23	0	0	0	0	0	0	0	0	0	1	Microperforates_Globigerinita_glutinata	Microperforates	Globigerinita	glutinata	-	FJ643296_Microperforates_Globigerinita_glutinata_III_NA_NA;KM193199_Microperforates_Globigerinita_glutinata_NA_NA_NA;FJ643277_Microperforates_Globigerinita_glutinata_III_NA_NA;AY453136_Microperforates_Globigerinita_glutinata_III_NA_NA;JQ799900_Microperforates_Globigerinita_glutinata_IV_NA_NA;	Microperforates	Globigerinita	glutinata	III	Microperforates_Globigerinita_glutinata_III
ISU1056	1	4	NO	-	0	0	0	0	0	4	0	0	0	0	0	0	0	0	0	0	0	0	0	0	0	0	0	0	0	0	0	0	0	0	0	3	Microperforates_Globigerinita_glutinata	Microperforates	Globigerinita	glutinata	-	FJ643294_Microperforates_Globigerinita_glutinata_I_NA_NA;KM193497_Microperforates_Globigerinita_glutinata_NA_NA_NA;FJ643283_Microperforates_Globigerinita_glutinata_III_NA_NA;KM193151_Microperforates_Globigerinita_glutinata_NA_NA_NA	-	-	-	-	-
ISU1057	1	2	NO	-	0	0	0	0	0	0	0	0	0	0	0	0	0	0	0	0	0	0	0	0	0	2	0	0	0	0	0	0	0	0	0	2	Microperforates_Globigerinita_glutinata	Microperforates	Globigerinita	glutinata	-	KM193484_Microperforates_Globigerinita_glutinata_NA_NA_NA;FJ643286_Microperforates_Globigerinita_glutinata_I_NA_NA	-	-	-	-	-
ISU1058	1	2	NO	-	0	0	0	0	0	0	0	0	0	0	0	0	0	0	0	0	0	0	0	2	0	0	0	0	0	0	0	0	0	0	0	3	Microperforates_Globigerinita_glutinata	Microperforates	Globigerinita	glutinata	-	FJ643294_Microperforates_Globigerinita_glutinata_I_NA_NA;KM193497_Microperforates_Globigerinita_glutinata_NA_NA_NA;FJ643283_Microperforates_Globigerinita_glutinata_III_NA_NA;KM193151_Microperforates_Globigerinita_glutinata_NA_NA_NA	-	-	-	-	-
ISU1059	2	6	Yes	R-594_2_6_5	0	0	0	0	0	0	0	0	0	0	0	0	0	0	0	0	0	0	2	4	0	0	0	0	0	0	0	0	0	0	0	5	Microperforates_Globigerinita_glutinata	Microperforates	Globigerinita	glutinata	-	JQ799900_Microperforates_Globigerinita_glutinata_IV_NA_NA;FJ643288_Microperforates_Globigerinita_glutinata_I_NA_NA;KM193539_Microperforates_Globigerinita_glutinata_NA_NA_NA;KM193303_Microperforates_Globigerinita_glutinata_NA_NA_NA;FJ643296_Microperforates_Globigerinita_glutinata_III_NA_NA;FJ643277_Microperforates_Globigerinita_glutinata_III_NA_NA;KM193199_Microperforates_Globigerinita_glutinata_N…	Microperforates	Globigerinita	glutinata	III	Microperforates_Globigerinita_glutinata_III
ISU106	1	2	NO	-	0	0	0	0	0	2	0	0	0	0	0	0	0	0	0	0	0	0	0	0	0	0	0	0	0	0	0	0	0	0	0	1	Microperforates_Globigerinita_glutinata	Microperforates	Globigerinita	glutinata	-	JQ799900_Microperforates_Globigerinita_glutinata_IV_NA_NA;FJ643296_Microperforates_Globigerinita_glutinata_III_NA_NA;KM193199_Microperforates_Globigerinita_glutinata_NA_NA_NA;AY453136_Microperforates_Globigerinita_glutinata_III_NA_NA	-	-	-	-	-
ISU1060	1	2	NO	-	0	0	0	0	0	2	0	0	0	0	0	0	0	0	0	0	0	0	0	0	0	0	0	0	0	0	0	0	0	0	0	1	Microperforates_Globigerinita_glutinata	Microperforates	Globigerinita	glutinata	-	AB468829_Microperforates_Globigerinita_glutinata_II_NA_NA;AB468827_Microperforates_Globigerinita_glutinata_II_NA_NA;FJ643418_Microperforates_Globigerinita_glutinata_NA_NA_NA;	-	-	-	-	-
ISU1061	4	59	Yes	R-166_4_59_1	0	0	0	0	0	18	0	0	0	0	0	0	0	0	0	0	0	0	9	15	0	17	0	0	0	0	0	0	0	0	0	1	Microperforates_Globigerinita_glutinata	Microperforates	Globigerinita	glutinata	-	JQ799900_Microperforates_Globigerinita_glutinata_IV_NA_NA;FJ643296_Microperforates_Globigerinita_glutinata_III_NA_NA;KM193199_Microperforates_Globigerinita_glutinata_NA_NA_NA;AY453136_Microperforates_Globigerinita_glutinata_III_NA_NA	Microperforates	Globigerinita	glutinata	III	Microperforates_Globigerinita_glutinata_III
ISU1062	2	5	Yes	R-639_2_5_2	0	0	0	0	0	3	0	0	0	0	0	0	0	0	0	0	0	0	0	0	0	2	0	0	0	0	0	0	0	0	0	2	Microperforates_Globigerinita_glutinata_NA_NA_NA	Microperforates	Globigerinita	glutinata	NA	NAKM193539_Microperforates_Globigerinita_glutinata_NA_NA_NA;	Microperforates	Globigerinita	glutinata	I	Microperforates_Globigerinita_glutinata_I
ISU1063	2	6	Yes	R-560_2_6_1	0	0	0	0	0	2	0	0	0	0	0	0	0	0	0	0	0	0	0	0	0	4	0	0	0	0	0	0	0	0	0	1	Spinose_Globigerina_bulloides	Spinose	Globigerina	bulloides	-	Z83957_Spinose_Globigerina_bulloides_NA_NA_NA;GQ293072_Spinose_Globigerina_bulloides_I_c_NA;GQ293070_Spinose_Globigerina_bulloides_I_d_NA;GU060421_Spinose_Globigerina_bulloides_I_e_NA	Microperforates	Globigerinita	glutinata	I	Microperforates_Globigerinita_glutinata_I
ISU1064	7	114	Yes	R-108_7_114_2	0	0	0	3	9	18	0	0	0	0	0	0	0	0	0	0	0	0	12	32	0	35	0	0	5	0	0	0	0	0	0	2	Microperforates_Globigerinita_glutinata	Microperforates	Globigerinita	glutinata	-	FJ643296_Microperforates_Globigerinita_glutinata_III_NA_NA;AY453136_Microperforates_Globigerinita_glutinata_III_NA_NA;KM193199_Microperforates_Globigerinita_glutinata_NA_NA_NA;FJ643277_Microperforates_Globigerinita_glutinata_III_NA_NA;JQ799900_Microperforates_Globigerinita_glutinata_IV_NA_NA;	Microperforates	Globigerinita	glutinata	III	Microperforates_Globigerinita_glutinata_III
ISU1065	1	2	NO	-	0	0	0	0	2	0	0	0	0	0	0	0	0	0	0	0	0	0	0	0	0	0	0	0	0	0	0	0	0	0	0	3	Microperforates_Globigerinita_glutinata	Microperforates	Globigerinita	glutinata	-	KM193497_Microperforates_Globigerinita_glutinata_NA_NA_NA;KM193151_Microperforates_Globigerinita_glutinata_NA_NA_NA;FJ643283_Microperforates_Globigerinita_glutinata_III_NA_NA;FJ643294_Microperforates_Globigerinita_glutinata_I_NA_NA	-	-	-	-	-
ISU1066	1	3	NO	-	3	0	0	0	0	0	0	0	0	0	0	0	0	0	0	0	0	0	0	0	0	0	0	0	0	0	0	0	0	0	0	1	Microperforates_Globigerinita_uvula	Microperforates	Globigerinita	uvula	-	KM193181_Microperforates_Globigerinita_uvula_NA_NA_NA;KM193691_Microperforates_Globigerinita_uvula_NA_NA_NA;KM193364_Microperforates_Globigerinita_uvula_NA_NA_NA;AF387173_Microperforates_Globigerinita_uvula_II_NA_NA;KM194324_Microperforates_Globigerinita_uvula_NA_NA_NA;	-	-	-	-	-
ISU1067	1	3	NO	-	0	0	0	0	0	0	0	0	0	0	0	0	0	0	0	0	0	0	0	0	0	0	0	0	0	0	0	0	3	0	0	1	Non-Spinose_Neogloboquadrina_pachyderma_IV_NA_NA	Non-Spinose	Neogloboquadrina	pachyderma	IV	NAKM193550_Non-Spinose_Neogloboquadrina_pachyderma_IV_NA_NA;KM193530_Non-Spinose_Neogloboquadrina_pachyderma_IV_NA_NA;KM193284_Non-Spinose_Neogloboquadrina_pachyderma_IV_NA_NA;KM193861_Non-Spinose_Neogloboquadrina_pachyderma_IV_NA_NA;KM193614_Non-Spinose_Neogloboquadrina_pachyderma_IV_NA_NA;KM193889_Non-Spinose_Neogloboquadrina_pachyderma_IV_NA_NA;KM193556_Non-Spinose_Neogloboquadrina_pachyderma_…	-	-	-	-	-
ISU1068	2	4	Yes	R-682_2_4_1	0	0	0	0	0	0	0	0	0	0	0	0	0	0	0	0	0	0	0	2	0	2	0	0	0	0	0	0	0	0	0	1	Microperforates_Globigerinita_glutinata	Microperforates	Globigerinita	glutinata	-	JQ799900_Microperforates_Globigerinita_glutinata_IV_NA_NA;FJ643296_Microperforates_Globigerinita_glutinata_III_NA_NA;KM193199_Microperforates_Globigerinita_glutinata_NA_NA_NA;AY453136_Microperforates_Globigerinita_glutinata_III_NA_NA	Microperforates	Globigerinita	glutinata	III	Microperforates_Globigerinita_glutinata_III
ISU1069	4	59	Yes	R-165_4_59_1	0	0	0	0	0	28	0	0	0	0	0	0	0	0	0	0	0	0	6	17	0	8	0	0	0	0	0	0	0	0	0	1	Microperforates_Globigerinita_glutinata	Microperforates	Globigerinita	glutinata	-	JQ799900_Microperforates_Globigerinita_glutinata_IV_NA_NA;FJ643296_Microperforates_Globigerinita_glutinata_III_NA_NA;KM193199_Microperforates_Globigerinita_glutinata_NA_NA_NA;AY453136_Microperforates_Globigerinita_glutinata_III_NA_NA	Microperforates	Globigerinita	glutinata	III	Microperforates_Globigerinita_glutinata_III
ISU107	1	2	NO	-	2	0	0	0	0	0	0	0	0	0	0	0	0	0	0	0	0	0	0	0	0	0	0	0	0	0	0	0	0	0	0	1	Microperforates_Globigerinita_uvula	Microperforates	Globigerinita	uvula	-	KM193181_Microperforates_Globigerinita_uvula_NA_NA_NA;KM193691_Microperforates_Globigerinita_uvula_NA_NA_NA;KM193364_Microperforates_Globigerinita_uvula_NA_NA_NA;AF387173_Microperforates_Globigerinita_uvula_II_NA_NA;KM194324_Microperforates_Globigerinita_uvula_NA_NA_NA;	-	-	-	-	-
ISU1070	1	3	NO	-	0	0	0	0	0	3	0	0	0	0	0	0	0	0	0	0	0	0	0	0	0	0	0	0	0	0	0	0	0	0	0	3	Microperforates_Globigerinita_glutinata	Microperforates	Globigerinita	glutinata	-	JQ799900_Microperforates_Globigerinita_glutinata_IV_NA_NA;FJ643296_Microperforates_Globigerinita_glutinata_III_NA_NA;FJ643277_Microperforates_Globigerinita_glutinata_III_NA_NA;KM193199_Microperforates_Globigerinita_glutinata_NA_NA_NA;AY453136_Microperforates_Globigerinita_glutinata_III_NA_NA;	-	-	-	-	-
ISU1071	4	32	Yes	R-254_4_32_1	0	0	0	0	0	14	0	0	0	0	0	0	0	0	0	0	0	0	5	7	0	6	0	0	0	0	0	0	0	0	0	1	Microperforates_Globigerinita_glutinata_III_NA_NA	Microperforates	Globigerinita	glutinata	III	NAFJ643283_Microperforates_Globigerinita_glutinata_III_NA_NA;	Microperforates	Globigerinita	glutinata	III	Microperforates_Globigerinita_glutinata_III
ISU1072	1	2	NO	-	0	0	0	0	0	0	0	0	0	0	0	0	0	0	0	0	0	0	0	0	0	2	0	0	0	0	0	0	0	0	0	3	Microperforates_Globigerinita_glutinata	Microperforates	Globigerinita	glutinata	-	KM193497_Microperforates_Globigerinita_glutinata_NA_NA_NA;FJ643294_Microperforates_Globigerinita_glutinata_I_NA_NA;KM193151_Microperforates_Globigerinita_glutinata_NA_NA_NA;	-	-	-	-	-
ISU1073	1	3	NO	-	0	0	0	0	0	0	0	0	0	0	0	0	0	0	0	0	0	0	0	3	0	0	0	0	0	0	0	0	0	0	0	2	Microperforates_Globigerinita_glutinata	Microperforates	Globigerinita	glutinata	-	JQ799900_Microperforates_Globigerinita_glutinata_IV_NA_NA;FJ643296_Microperforates_Globigerinita_glutinata_III_NA_NA;KM193199_Microperforates_Globigerinita_glutinata_NA_NA_NA;AY453136_Microperforates_Globigerinita_glutinata_III_NA_NA	-	-	-	-	-
ISU1074	2	6	Yes	R-583_2_6_2	0	0	0	0	0	4	0	0	0	0	0	0	0	0	0	0	0	0	0	0	0	2	0	0	0	0	0	0	0	0	0	2	Microperforates_Globigerinita_glutinata	Microperforates	Globigerinita	glutinata	-	FJ643294_Microperforates_Globigerinita_glutinata_I_NA_NA;KM193497_Microperforates_Globigerinita_glutinata_NA_NA_NA;FJ643283_Microperforates_Globigerinita_glutinata_III_NA_NA;KM193151_Microperforates_Globigerinita_glutinata_NA_NA_NA	Microperforates	Globigerinita	glutinata	III	Microperforates_Globigerinita_glutinata_III
ISU1075	1	4	NO	-	4	0	0	0	0	0	0	0	0	0	0	0	0	0	0	0	0	0	0	0	0	0	0	0	0	0	0	0	0	0	0	1	Microperforates_Globigerinita_uvula	Microperforates	Globigerinita	uvula	-	KM193181_Microperforates_Globigerinita_uvula_NA_NA_NA;KM193691_Microperforates_Globigerinita_uvula_NA_NA_NA;KM193364_Microperforates_Globigerinita_uvula_NA_NA_NA;AF387173_Microperforates_Globigerinita_uvula_II_NA_NA;KM194324_Microperforates_Globigerinita_uvula_NA_NA_NA;	-	-	-	-	-
ISU1076	1	2	NO	-	0	0	0	0	0	2	0	0	0	0	0	0	0	0	0	0	0	0	0	0	0	0	0	0	0	0	0	0	0	0	0	2	Microperforates_Globigerinita_glutinata	Microperforates	Globigerinita	glutinata	-	JQ799900_Microperforates_Globigerinita_glutinata_IV_NA_NA;FJ643296_Microperforates_Globigerinita_glutinata_III_NA_NA;KM193199_Microperforates_Globigerinita_glutinata_NA_NA_NA;AY453136_Microperforates_Globigerinita_glutinata_III_NA_NA	-	-	-	-	-
ISU1077	4	38	Yes	R-229_4_38_1	0	0	0	0	0	0	0	0	0	7	20	6	0	0	0	0	0	0	0	0	0	0	0	0	0	5	0	0	0	0	0	1	Non-Spinose_Neogloboquadrina_pachyderma_I_NA_NA	Non-Spinose	Neogloboquadrina	pachyderma	I	NAAY305329_Non-Spinose_Neogloboquadrina_pachyderma_I_NA_NA;	Non-Spinose	Neogloboquadrina	pachyderma	I	Non-Spinose_Neogloboquadrina_pachyderma_I
ISU1078	5	19	Yes	R-336_5_19_6	0	0	0	0	0	6	0	0	0	0	0	0	0	0	0	0	0	0	2	5	0	4	0	0	2	0	0	0	0	0	0	6	Microperforates_Globigerinita_uvula	Microperforates	Globigerinita	uvula	-	FJ643298_Microperforates_Globigerinita_uvula_I_NA_NA;KM193079_Microperforates_Globigerinita_uvula_NA_NA_NA;KM193070_Microperforates_Globigerinita_uvula_NA_NA_NA;	Microperforates	Globigerinita	uvula	I	Microperforates_Globigerinita_uvula_I
ISU1079	1	2	NO	-	0	0	0	0	0	2	0	0	0	0	0	0	0	0	0	0	0	0	0	0	0	0	0	0	0	0	0	0	0	0	0	4	Microperforates_Globigerinita_glutinata	Microperforates	Globigerinita	glutinata	-	JQ799900_Microperforates_Globigerinita_glutinata_IV_NA_NA;FJ643288_Microperforates_Globigerinita_glutinata_I_NA_NA;KM193303_Microperforates_Globigerinita_glutinata_NA_NA_NA;FJ643296_Microperforates_Globigerinita_glutinata_III_NA_NA;FJ643277_Microperforates_Globigerinita_glutinata_III_NA_NA;KM193539_Microperforates_Globigerinita_glutinata_NA_NA_NA;KM193199_Microperforates_Globigerinita_glutinata_N…	-	-	-	-	-
ISU108	1	2	NO	-	0	0	0	0	0	0	0	0	0	0	0	0	0	0	0	0	0	0	0	2	0	0	0	0	0	0	0	0	0	0	0	2	Microperforates_Globigerinita_glutinata_III_NA_NA	Microperforates	Globigerinita	glutinata	III	NAFJ643277_Microperforates_Globigerinita_glutinata_III_NA_NA;	-	-	-	-	-
ISU1080	3	26	Yes	R-285_3_26_1	18	0	0	0	0	0	0	0	0	0	0	0	0	0	0	0	2	0	0	0	0	0	0	0	0	0	0	0	0	0	6	1	Microperforates_Globigerinita_uvula_NA_NA_NA	Microperforates	Globigerinita	uvula	NA	NAKM193691_Microperforates_Globigerinita_uvula_NA_NA_NA;	Microperforates	Globigerinita	uvula	II	Microperforates_Globigerinita_uvula_II
ISU1081	1	2	NO	-	2	0	0	0	0	0	0	0	0	0	0	0	0	0	0	0	0	0	0	0	0	0	0	0	0	0	0	0	0	0	0	2	Microperforates_Globigerinita_uvula	Microperforates	Globigerinita	uvula	-	KM193181_Microperforates_Globigerinita_uvula_NA_NA_NA;KM193691_Microperforates_Globigerinita_uvula_NA_NA_NA;KM193364_Microperforates_Globigerinita_uvula_NA_NA_NA;KM193357_Microperforates_Globigerinita_uvula_NA_NA_NA;AF387173_Microperforates_Globigerinita_uvula_II_NA_NA;KM194324_Microperforates_Globigerinita_uvula_NA_NA_NA;KM193324_Microperforates_Globigerinita_uvula_NA_NA_NA;	-	-	-	-	-
ISU1082	4	23	Yes	R-301_4_23_2	0	0	0	0	0	5	0	0	0	0	0	0	0	0	0	0	0	0	8	2	0	8	0	0	0	0	0	0	0	0	0	2	Microperforates_Globigerinita_glutinata	Microperforates	Globigerinita	glutinata	-	FJ643286_Microperforates_Globigerinita_glutinata_I_NA_NA;KM193484_Microperforates_Globigerinita_glutinata_NA_NA_NA	Microperforates	Globigerinita	glutinata	I	Microperforates_Globigerinita_glutinata_I
ISU1083	1	3	NO	-	0	0	0	0	0	0	0	0	0	0	0	0	0	0	0	0	0	0	0	3	0	0	0	0	0	0	0	0	0	0	0	2	Microperforates_Globigerinita_glutinata_III_NA_NA	Microperforates	Globigerinita	glutinata	III	NAFJ643283_Microperforates_Globigerinita_glutinata_III_NA_NA;	-	-	-	-	-
ISU1084	4	13	Yes	R-405_4_13_1	0	0	0	0	0	0	0	0	0	3	4	3	0	0	0	0	0	0	0	0	0	0	0	0	0	3	0	0	0	0	0	1	Non-Spinose_Neogloboquadrina_pachyderma_I_NA_NA	Non-Spinose	Neogloboquadrina	pachyderma	I	NAAY305329_Non-Spinose_Neogloboquadrina_pachyderma_I_NA_NA;	Non-Spinose	Neogloboquadrina	pachyderma	I	Non-Spinose_Neogloboquadrina_pachyderma_I
ISU1085	2	4	Yes	R-678_2_4_1	0	0	0	0	0	0	0	0	0	0	2	0	0	0	0	0	0	0	0	0	0	0	0	0	0	2	0	0	0	0	0	1	Non-Spinose_Neogloboquadrina_pachyderma_I_NA_NA	Non-Spinose	Neogloboquadrina	pachyderma	I	NAAY305329_Non-Spinose_Neogloboquadrina_pachyderma_I_NA_NA;	Non-Spinose	Neogloboquadrina	pachyderma	I	Non-Spinose_Neogloboquadrina_pachyderma_I
ISU1086	5	33	Yes	R-249_5_33_1	0	0	0	0	3	9	0	0	0	0	0	0	0	0	0	0	0	0	3	9	0	9	0	0	0	0	0	0	0	0	0	1	Microperforates_Globigerinita_glutinata	Microperforates	Globigerinita	glutinata	-	FJ643296_Microperforates_Globigerinita_glutinata_III_NA_NA;KM193199_Microperforates_Globigerinita_glutinata_NA_NA_NA;FJ643277_Microperforates_Globigerinita_glutinata_III_NA_NA;AY453136_Microperforates_Globigerinita_glutinata_III_NA_NA;JQ799900_Microperforates_Globigerinita_glutinata_IV_NA_NA;	Microperforates	Globigerinita	glutinata	III	Microperforates_Globigerinita_glutinata_III
ISU1087	1	4	NO	-	0	0	0	0	0	0	0	0	0	0	0	0	0	0	0	0	0	0	0	4	0	0	0	0	0	0	0	0	0	0	0	6	Microperforates_Globigerinita_glutinata	Microperforates	Globigerinita	glutinata	-	FJ643286_Microperforates_Globigerinita_glutinata_I_NA_NA;KM193484_Microperforates_Globigerinita_glutinata_NA_NA_NA	-	-	-	-	-
ISU1088	5	121	Yes	R-106_5_121_1	0	0	0	0	8	34	0	0	0	0	0	0	0	0	0	0	0	0	22	25	0	32	0	0	0	0	0	0	0	0	0	1	Microperforates_Globigerinita_glutinata	Microperforates	Globigerinita	glutinata	-	KM193497_Microperforates_Globigerinita_glutinata_NA_NA_NA;KM193151_Microperforates_Globigerinita_glutinata_NA_NA_NA;FJ643283_Microperforates_Globigerinita_glutinata_III_NA_NA;FJ643294_Microperforates_Globigerinita_glutinata_I_NA_NA	Microperforates	Globigerinita	glutinata	III	Microperforates_Globigerinita_glutinata_III
ISU1089	2	5	Yes	R-625_2_5_1	0	0	0	0	0	0	0	0	0	0	3	2	0	0	0	0	0	0	0	0	0	0	0	0	0	0	0	0	0	0	0	1	Non-Spinose_Neogloboquadrina_pachyderma_I_NA_NA	Non-Spinose	Neogloboquadrina	pachyderma	I	NAAY305329_Non-Spinose_Neogloboquadrina_pachyderma_I_NA_NA;	Non-Spinose	Neogloboquadrina	pachyderma	I	Non-Spinose_Neogloboquadrina_pachyderma_I
ISU109	1	2	NO	-	0	0	0	0	0	0	0	0	0	0	0	0	0	0	0	0	0	0	0	2	0	0	0	0	0	0	0	0	0	0	0	6	Microperforates_Globigerinita_glutinata	Microperforates	Globigerinita	glutinata	-	FJ643286_Microperforates_Globigerinita_glutinata_I_NA_NA;KM193484_Microperforates_Globigerinita_glutinata_NA_NA_NA	-	-	-	-	-
ISU1090	1	5	NO	-	0	0	0	0	0	0	0	0	0	0	0	0	0	0	0	0	0	0	0	0	0	0	0	0	0	0	0	0	5	0	0	1	Non-Spinose_Neogloboquadrina_pachyderma_IV_NA_NA	Non-Spinose	Neogloboquadrina	pachyderma	IV	NAKM193680_Non-Spinose_Neogloboquadrina_pachyderma_IV_NA_NA;	-	-	-	-	-
ISU1091	2	8	Yes	R-516_2_8_2	0	0	0	0	0	0	0	0	0	0	0	0	0	0	0	0	0	0	6	2	0	0	0	0	0	0	0	0	0	0	0	2	Microperforates_Globigerinita_glutinata_II_NA_NA	Microperforates	Globigerinita	glutinata	II	NAAB468826_Microperforates_Globigerinita_glutinata_II_NA_NA;	Microperforates	Globigerinita	glutinata	II	Microperforates_Globigerinita_glutinata_II
ISU1092	1	4	NO	-	0	0	0	0	0	0	0	0	0	0	0	0	0	0	0	0	0	0	0	4	0	0	0	0	0	0	0	0	0	0	0	1	Microperforates_Candeina_nitida_NA_NA_NA	Microperforates	Candeina	nitida	NA	NAAB263435_Microperforates_Candeina_nitida_NA_NA_NA;	-	-	-	-	-
ISU1093	1	2	NO	-	0	0	0	0	0	0	0	0	0	0	0	0	0	0	0	0	0	0	0	2	0	0	0	0	0	0	0	0	0	0	0	5	Microperforates_Globigerinita_uvula	Microperforates	Globigerinita	uvula	-	FJ643298_Microperforates_Globigerinita_uvula_I_NA_NA;KM193160_Microperforates_Globigerinita_uvula_NA_NA_NA;KM193075_Microperforates_Globigerinita_uvula_NA_NA_NA;KM193070_Microperforates_Globigerinita_uvula_NA_NA_NA;KM193079_Microperforates_Globigerinita_uvula_NA_NA_NA;	-	-	-	-	-
ISU1094	3	6	Yes	R-590_3_6_1	0	0	0	0	0	0	0	0	0	0	0	0	0	0	0	0	0	0	2	2	0	2	0	0	0	0	0	0	0	0	0	1	Microperforates_Globigerinita_glutinata	Microperforates	Globigerinita	glutinata	-	JQ799900_Microperforates_Globigerinita_glutinata_IV_NA_NA;FJ643296_Microperforates_Globigerinita_glutinata_III_NA_NA;FJ643277_Microperforates_Globigerinita_glutinata_III_NA_NA;KM193199_Microperforates_Globigerinita_glutinata_NA_NA_NA;AY453136_Microperforates_Globigerinita_glutinata_III_NA_NA;	Microperforates	Globigerinita	glutinata	III	Microperforates_Globigerinita_glutinata_III
ISU1095	1	2	NO	-	0	0	0	0	0	0	0	0	0	0	0	0	0	0	0	0	0	0	2	0	0	0	0	0	0	0	0	0	0	0	0	1	Microperforates_Globigerinita_glutinata_III_NA_NA	Microperforates	Globigerinita	glutinata	III	NAFJ643277_Microperforates_Globigerinita_glutinata_III_NA_NA;	-	-	-	-	-
ISU1096	1	2	NO	-	0	0	0	0	0	0	0	0	0	0	0	0	0	0	0	0	0	0	0	0	0	2	0	0	0	0	0	0	0	0	0	1	Microperforates_Globigerinita_glutinata_II_NA_NA	Microperforates	Globigerinita	glutinata	II	NAAB468826_Microperforates_Globigerinita_glutinata_II_NA_NA;	-	-	-	-	-
ISU1097	1	3	NO	-	0	0	0	0	0	0	0	0	0	0	0	0	0	0	0	0	0	0	0	0	0	0	0	0	0	0	0	0	0	3	0	4	Microperforates_Globigerinita_glutinata_II_NA_NA	Microperforates	Globigerinita	glutinata	II	NAFJ643298_Microperforates_Globigerinita_uvula_I_NA_NA;KM193070_Microperforates_Globigerinita_uvula_NA_NA_NA;KM193278_Microperforates_Globigerinita_uvula_NA_NA_NA;KM193079_Microperforates_Globigerinita_uvula_NA_NA_NA;KM193160_Microperforates_Globigerinita_uvula_NA_NA_NA;KM193075_Microperforates_Globigerinita_uvula_NA_NA_NA;KM194434_Rotaliida_Rotaliida_sp.2_NA_NA_NA;	-	-	-	-	-
ISU1098	1	2	NO	-	0	0	0	0	0	0	0	0	0	0	2	0	0	0	0	0	0	0	0	0	0	0	0	0	0	0	0	0	0	0	0	2	Non-Spinose_Neogloboquadrina_pachyderma_I_NA_NA	Non-Spinose	Neogloboquadrina	pachyderma	I	NAAY305329_Non-Spinose_Neogloboquadrina_pachyderma_I_NA_NA;	-	-	-	-	-
ISU1099	1	2	NO	-	0	0	0	0	0	2	0	0	0	0	0	0	0	0	0	0	0	0	0	0	0	0	0	0	0	0	0	0	0	0	0	1	Microperforates_Globigerinita_glutinata_III_NA_NA	Microperforates	Globigerinita	glutinata	III	NAFJ643283_Microperforates_Globigerinita_glutinata_III_NA_NA;	-	-	-	-	-
ISU11	1	5	NO	-	0	0	0	0	0	0	0	0	0	0	0	0	0	0	0	0	0	0	0	5	0	0	0	0	0	0	0	0	0	0	0	6	Microperforates_Globigerinita_uvula	Microperforates	Globigerinita	uvula	-	FJ643298_Microperforates_Globigerinita_uvula_I_NA_NA;KM193160_Microperforates_Globigerinita_uvula_NA_NA_NA;KM193075_Microperforates_Globigerinita_uvula_NA_NA_NA;KM193070_Microperforates_Globigerinita_uvula_NA_NA_NA;KM193079_Microperforates_Globigerinita_uvula_NA_NA_NA;	-	-	-	-	-
ISU110	1	2	NO	-	0	0	0	0	0	0	0	0	0	0	0	0	0	0	0	0	0	0	0	0	0	0	0	0	0	2	0	0	0	0	0	1	Non-Spinose_Neogloboquadrina_pachyderma_I_NA_NA	Non-Spinose	Neogloboquadrina	pachyderma	I	NAAY305329_Non-Spinose_Neogloboquadrina_pachyderma_I_NA_NA;	-	-	-	-	-
ISU1100	1	2	NO	-	0	0	0	0	0	0	0	0	0	0	0	0	0	0	0	0	0	0	0	0	0	2	0	0	0	0	0	0	0	0	0	2	Microperforates_Globigerinita_glutinata	Microperforates	Globigerinita	glutinata	-	KM193484_Microperforates_Globigerinita_glutinata_NA_NA_NA;FJ643286_Microperforates_Globigerinita_glutinata_I_NA_NA	-	-	-	-	-
ISU1101	3	7	Yes	R-518_3_7_2	0	0	0	0	2	3	0	0	0	0	0	0	0	0	0	0	0	0	0	0	0	2	0	0	0	0	0	0	0	0	0	2	Microperforates_Globigerinita_uvula	Microperforates	Globigerinita	uvula	-	FJ643298_Microperforates_Globigerinita_uvula_I_NA_NA;KM193070_Microperforates_Globigerinita_uvula_NA_NA_NA;KM193079_Microperforates_Globigerinita_uvula_NA_NA_NA;	Microperforates	Globigerinita	glutinata	III	Microperforates_Globigerinita_glutinata_III
ISU1102	1	3	NO	-	0	0	0	0	0	0	0	0	0	0	0	0	0	0	0	0	0	0	0	3	0	0	0	0	0	0	0	0	0	0	0	2	Microperforates_Globigerinita_glutinata	Microperforates	Globigerinita	glutinata	-	JQ799900_Microperforates_Globigerinita_glutinata_IV_NA_NA;FJ643296_Microperforates_Globigerinita_glutinata_III_NA_NA;KM193199_Microperforates_Globigerinita_glutinata_NA_NA_NA;AY453136_Microperforates_Globigerinita_glutinata_III_NA_NA	-	-	-	-	-
ISU1103	4	22	Yes	R-307_4_22_5	0	0	0	0	0	13	0	0	0	0	0	0	0	0	0	0	0	0	2	4	0	3	0	0	0	0	0	0	0	0	0	5	Microperforates_Globigerinita_uvula	Microperforates	Globigerinita	uvula	-	FJ643298_Microperforates_Globigerinita_uvula_I_NA_NA;KM193079_Microperforates_Globigerinita_uvula_NA_NA_NA;KM193070_Microperforates_Globigerinita_uvula_NA_NA_NA;	Microperforates	Globigerinita	uvula	I	Microperforates_Globigerinita_uvula_I
ISU1104	3	11	Yes	R-431_3_11_1	0	0	0	0	0	4	0	0	0	0	0	0	0	0	0	0	0	0	5	0	0	2	0	0	0	0	0	0	0	0	0	1	Microperforates_Globigerinita_glutinata	Microperforates	Globigerinita	glutinata	-	JQ799900_Microperforates_Globigerinita_glutinata_IV_NA_NA;FJ643296_Microperforates_Globigerinita_glutinata_III_NA_NA;KM193199_Microperforates_Globigerinita_glutinata_NA_NA_NA;AY453136_Microperforates_Globigerinita_glutinata_III_NA_NA	Microperforates	Globigerinita	glutinata	III	Microperforates_Globigerinita_glutinata_III
ISU1105	1	2	NO	-	0	0	0	0	0	0	0	0	0	0	0	0	0	0	0	0	0	0	0	0	0	2	0	0	0	0	0	0	0	0	0	1	Microperforates_Globigerinita_glutinata_III_NA_NA	Microperforates	Globigerinita	glutinata	III	NAFJ643277_Microperforates_Globigerinita_glutinata_III_NA_NA;	-	-	-	-	-
ISU1106	2	4	Yes	R-660_2_4_4	0	0	0	0	0	2	0	0	0	0	0	0	0	0	0	0	0	0	0	2	0	0	0	0	0	0	0	0	0	0	0	4	Microperforates_Globigerinita_uvula	Microperforates	Globigerinita	uvula	-	FJ643298_Microperforates_Globigerinita_uvula_I_NA_NA;KM193079_Microperforates_Globigerinita_uvula_NA_NA_NA;KM193070_Microperforates_Globigerinita_uvula_NA_NA_NA;	Microperforates	Globigerinita	glutinata	I	Microperforates_Globigerinita_glutinata_I
ISU1107	4	132	Yes	R-103_4_132_2	0	0	3	0	0	0	0	0	0	20	86	23	0	0	0	0	0	0	0	0	0	0	0	0	0	0	0	0	0	0	0	2	Non-Spinose_Neogloboquadrina_pachyderma_I_NA_NA	Non-Spinose	Neogloboquadrina	pachyderma	I	NAAY305329_Non-Spinose_Neogloboquadrina_pachyderma_I_NA_NA;	Non-Spinose	Neogloboquadrina	pachyderma	I	Non-Spinose_Neogloboquadrina_pachyderma_I
ISU1108	2	7	Yes	R-531_2_7_1	0	0	0	0	0	0	0	0	0	2	5	0	0	0	0	0	0	0	0	0	0	0	0	0	0	0	0	0	0	0	0	1	Non-Spinose_Neogloboquadrina_pachyderma_I_NA_NA	Non-Spinose	Neogloboquadrina	pachyderma	I	NAAY305329_Non-Spinose_Neogloboquadrina_pachyderma_I_NA_NA;	Non-Spinose	Neogloboquadrina	pachyderma	I	Non-Spinose_Neogloboquadrina_pachyderma_I
ISU1109	2	4	Yes	R-689_2_4_3	0	0	0	0	0	2	0	0	0	0	0	0	0	0	0	0	0	0	0	2	0	0	0	0	0	0	0	0	0	0	0	3	Microperforates_Globigerinita_glutinata	Microperforates	Globigerinita	glutinata	-	FJ643286_Microperforates_Globigerinita_glutinata_I_NA_NA;KM193484_Microperforates_Globigerinita_glutinata_NA_NA_NA	Microperforates	Globigerinita	glutinata	III	Microperforates_Globigerinita_glutinata_III
ISU111	1	2	NO	-	0	0	0	0	0	0	0	0	0	0	0	0	0	0	0	0	0	0	0	0	0	2	0	0	0	0	0	0	0	0	0	1	Spinose_Globigerina_bulloides	Spinose	Globigerina	bulloides	-	GQ293072_Spinose_Globigerina_bulloides_I_c_NA;GU060421_Spinose_Globigerina_bulloides_I_e_NA;GQ293070_Spinose_Globigerina_bulloides_I_d_NA;Z83957_Spinose_Globigerina_bulloides_NA_NA_NA	-	-	-	-	-
ISU1110	1	5	NO	-	5	0	0	0	0	0	0	0	0	0	0	0	0	0	0	0	0	0	0	0	0	0	0	0	0	0	0	0	0	0	0	0	Microperforates_Globigerinita_uvula	Microperforates	Globigerinita	uvula	-	KM193181_Microperforates_Globigerinita_uvula_NA_NA_NA;AF387173_Microperforates_Globigerinita_uvula_II_NA_NA;KM194324_Microperforates_Globigerinita_uvula_NA_NA_NA;	-	-	-	-	-
ISU1111	2	28	Yes	R-269_2_28_1	25	0	0	0	0	0	0	0	0	0	0	0	0	0	0	0	0	0	0	0	0	0	0	0	0	3	0	0	0	0	0	1	Non-Spinose_Neogloboquadrina_pachyderma_I_NA_NA	Non-Spinose	Neogloboquadrina	pachyderma	I	NAAY305329_Non-Spinose_Neogloboquadrina_pachyderma_I_NA_NA;	Non-Spinose	Neogloboquadrina	pachyderma	U4	Non-Spinose_Neogloboquadrina_pachyderma_U4
ISU1112	1	2	NO	-	0	0	0	0	0	0	0	0	0	0	0	0	0	0	0	0	0	0	0	0	0	2	0	0	0	0	0	0	0	0	0	1	Microperforates_Globigerinita_glutinata_III_NA_NA	Microperforates	Globigerinita	glutinata	III	NAFJ643277_Microperforates_Globigerinita_glutinata_III_NA_NA;	-	-	-	-	-
ISU1113	1	5	NO	-	0	0	0	0	0	0	0	0	0	0	0	0	0	0	0	0	0	0	0	5	0	0	0	0	0	0	0	0	0	0	0	4	Microperforates_Globigerinita_glutinata	Microperforates	Globigerinita	glutinata	-	JQ799900_Microperforates_Globigerinita_glutinata_IV_NA_NA;FJ643288_Microperforates_Globigerinita_glutinata_I_NA_NA;KM193539_Microperforates_Globigerinita_glutinata_NA_NA_NA;FJ643296_Microperforates_Globigerinita_glutinata_III_NA_NA;FJ643277_Microperforates_Globigerinita_glutinata_III_NA_NA;KM193303_Microperforates_Globigerinita_glutinata_NA_NA_NA;KM193199_Microperforates_Globigerinita_glutinata_N…	-	-	-	-	-
ISU1114	1	2	NO	-	0	0	0	0	0	2	0	0	0	0	0	0	0	0	0	0	0	0	0	0	0	0	0	0	0	0	0	0	0	0	0	1	Monolamellar_Hastigerina_pelagica	Monolamellar	Hastigerina	pelagica	-	FJ643408_Monolamellar_Hastigerina_pelagica_II_a_NA;KM194103_Monolamellar_Hastigerina_pelagica_NA_NA_NA;FJ643367_Monolamellar_Hastigerina_pelagica_II_a_NA;FJ643402_Monolamellar_Hastigerina_pelagica_NA_NA_NA	-	-	-	-	-
ISU1115	1	3	NO	-	0	0	0	0	0	0	0	0	0	0	0	0	0	0	0	0	0	0	3	0	0	0	0	0	0	0	0	0	0	0	0	1	Microperforates_Candeina_nitida_NA_NA_NA	Microperforates	Candeina	nitida	NA	NAAB263435_Microperforates_Candeina_nitida_NA_NA_NA;	-	-	-	-	-
ISU1116	1	3	NO	-	0	0	0	0	0	0	0	0	0	0	0	0	0	0	0	0	0	0	3	0	0	0	0	0	0	0	0	0	0	0	0	1	Microperforates_Globigerinita_uvula	Microperforates	Globigerinita	uvula	-	FJ643298_Microperforates_Globigerinita_uvula_I_NA_NA;KM193070_Microperforates_Globigerinita_uvula_NA_NA_NA;KM193079_Microperforates_Globigerinita_uvula_NA_NA_NA;	-	-	-	-	-
ISU1117	1	2	NO	-	0	0	0	0	0	0	0	0	0	0	0	0	0	0	0	0	0	0	0	2	0	0	0	0	0	0	0	0	0	0	0	5	Microperforates_Globigerinita_glutinata	Microperforates	Globigerinita	glutinata	-	JQ799900_Microperforates_Globigerinita_glutinata_IV_NA_NA;FJ643288_Microperforates_Globigerinita_glutinata_I_NA_NA;KM193539_Microperforates_Globigerinita_glutinata_NA_NA_NA;FJ643296_Microperforates_Globigerinita_glutinata_III_NA_NA;FJ643277_Microperforates_Globigerinita_glutinata_III_NA_NA;KM193303_Microperforates_Globigerinita_glutinata_NA_NA_NA;KM193199_Microperforates_Globigerinita_glutinata_N…	-	-	-	-	-
ISU1118	3	19	Yes	R-339_3_19_1	0	0	0	0	0	6	0	0	0	0	0	0	0	0	0	0	0	0	7	0	0	6	0	0	0	0	0	0	0	0	0	1	Microperforates_Globigerinita_glutinata	Microperforates	Globigerinita	glutinata	-	AY453136_Microperforates_Globigerinita_glutinata_III_NA_NA;KM193199_Microperforates_Globigerinita_glutinata_NA_NA_NA;JQ799900_Microperforates_Globigerinita_glutinata_IV_NA_NA;	Microperforates	Globigerinita	glutinata	III	Microperforates_Globigerinita_glutinata_III
ISU1119	1	2	NO	-	0	0	0	0	0	0	0	0	0	0	0	0	0	0	0	0	0	0	0	0	0	2	0	0	0	0	0	0	0	0	0	1	Spinose_Globigerina_falconensis_NA_NA_NA	Spinose	Globigerina	falconensis	NA	NAKM193431_Spinose_Globigerina_falconensis_NA_NA_NA;	-	-	-	-	-
ISU112	1	4	NO	-	4	0	0	0	0	0	0	0	0	0	0	0	0	0	0	0	0	0	0	0	0	0	0	0	0	0	0	0	0	0	0	1	Microperforates_Globigerinita_uvula	Microperforates	Globigerinita	uvula	-	KM193181_Microperforates_Globigerinita_uvula_NA_NA_NA;KM193691_Microperforates_Globigerinita_uvula_NA_NA_NA;KM193364_Microperforates_Globigerinita_uvula_NA_NA_NA;AF387173_Microperforates_Globigerinita_uvula_II_NA_NA;KM194324_Microperforates_Globigerinita_uvula_NA_NA_NA;	-	-	-	-	-
ISU1120	1	5	NO	-	0	0	0	0	5	0	0	0	0	0	0	0	0	0	0	0	0	0	0	0	0	0	0	0	0	0	0	0	0	0	0	0	Non-Spinose_Neogloboquadrina_dutertrei_NA_NA_NA	Non-Spinose	Neogloboquadrina	dutertrei	NA	NAKM193755_Non-Spinose_Neogloboquadrina_dutertrei_NA_NA_NA;KM193675_Non-Spinose_Neogloboquadrina_dutertrei_NA_NA_NA	-	-	-	-	-
ISU1121	2	4	Yes	R-670_2_4_1	2	0	0	0	0	0	0	0	0	0	0	0	0	0	0	0	2	0	0	0	0	0	0	0	0	0	0	0	0	0	0	1	Microperforates_Globigerinita_uvula	Microperforates	Globigerinita	uvula	-	KM193181_Microperforates_Globigerinita_uvula_NA_NA_NA;KM193691_Microperforates_Globigerinita_uvula_NA_NA_NA;KM193364_Microperforates_Globigerinita_uvula_NA_NA_NA;AF387173_Microperforates_Globigerinita_uvula_II_NA_NA;KM194324_Microperforates_Globigerinita_uvula_NA_NA_NA;	Microperforates	Globigerinita	uvula	II	Microperforates_Globigerinita_uvula_II
ISU1122	1	2	NO	-	0	0	0	0	0	2	0	0	0	0	0	0	0	0	0	0	0	0	0	0	0	0	0	0	0	0	0	0	0	0	0	3	Microperforates_Globigerinita_glutinata	Microperforates	Globigerinita	glutinata	-	FJ643294_Microperforates_Globigerinita_glutinata_I_NA_NA;KM193497_Microperforates_Globigerinita_glutinata_NA_NA_NA;FJ643283_Microperforates_Globigerinita_glutinata_III_NA_NA;KM193151_Microperforates_Globigerinita_glutinata_NA_NA_NA	-	-	-	-	-
ISU1123	2	4	Yes	R-688_2_4_1	0	0	0	0	2	2	0	0	0	0	0	0	0	0	0	0	0	0	0	0	0	0	0	0	0	0	0	0	0	0	0	1	Microperforates_Globigerinita_glutinata	Microperforates	Globigerinita	glutinata	-	FJ643296_Microperforates_Globigerinita_glutinata_III_NA_NA;KM193199_Microperforates_Globigerinita_glutinata_NA_NA_NA;FJ643277_Microperforates_Globigerinita_glutinata_III_NA_NA;AY453136_Microperforates_Globigerinita_glutinata_III_NA_NA;JQ799900_Microperforates_Globigerinita_glutinata_IV_NA_NA;	Microperforates	Globigerinita	glutinata	III	Microperforates_Globigerinita_glutinata_III
ISU1124	1	2	NO	-	0	0	0	0	0	0	0	0	0	0	0	0	0	0	0	0	0	0	0	0	0	2	0	0	0	0	0	0	0	0	0	5	Microperforates_Globigerinita_uvula	Microperforates	Globigerinita	uvula	-	KM193079_Microperforates_Globigerinita_uvula_NA_NA_NA;KM193160_Microperforates_Globigerinita_uvula_NA_NA_NA;FJ643298_Microperforates_Globigerinita_uvula_I_NA_NA;KM193075_Microperforates_Globigerinita_uvula_NA_NA_NA;KM193070_Microperforates_Globigerinita_uvula_NA_NA_NA;	-	-	-	-	-
ISU1125	1	6	NO	-	0	0	0	0	0	0	0	0	0	0	0	0	0	0	0	0	0	0	0	0	0	6	0	0	0	0	0	0	0	0	0	1	Spinose_Globigerina_bulloides	Spinose	Globigerina	bulloides	-	GQ293072_Spinose_Globigerina_bulloides_I_c_NA;GU060421_Spinose_Globigerina_bulloides_I_e_NA;GQ293070_Spinose_Globigerina_bulloides_I_d_NA;Z83957_Spinose_Globigerina_bulloides_NA_NA_NA	-	-	-	-	-
ISU1126	1	2	NO	-	0	0	0	0	0	0	0	0	0	0	0	0	0	0	0	0	0	0	2	0	0	0	0	0	0	0	0	0	0	0	0	1	Microperforates_Globigerinita_glutinata_III_NA_NA	Microperforates	Globigerinita	glutinata	III	NAFJ643296_Microperforates_Globigerinita_glutinata_III_NA_NA;	-	-	-	-	-
ISU1127	1	3	NO	-	0	0	0	0	0	0	0	0	0	0	0	0	0	0	0	0	0	0	0	0	0	0	0	0	0	0	0	0	3	0	0	1	Non-Spinose_Neogloboquadrina_pachyderma_IV_NA_NA	Non-Spinose	Neogloboquadrina	pachyderma	IV	NAKM193680_Non-Spinose_Neogloboquadrina_pachyderma_IV_NA_NA;	-	-	-	-	-
ISU1128	4	196	Yes	R-78_4_196_1	0	0	0	0	2	0	0	0	0	0	0	0	0	0	0	0	0	0	2	5	0	187	0	0	0	0	0	0	0	0	0	1	Microperforates_Candeina_nitida_NA_NA_NA	Microperforates	Candeina	nitida	NA	NAAB263435_Microperforates_Candeina_nitida_NA_NA_NA;	Microperforates	Candeina	nitida	I	Microperforates_Candeina_nitida_I
ISU1129	1	4	NO	-	0	0	0	0	0	0	0	0	0	0	0	4	0	0	0	0	0	0	0	0	0	0	0	0	0	0	0	0	0	0	0	2	Non-Spinose_Neogloboquadrina_pachyderma_I_NA_NA	Non-Spinose	Neogloboquadrina	pachyderma	I	NAAY305329_Non-Spinose_Neogloboquadrina_pachyderma_I_NA_NA;	-	-	-	-	-
ISU113	1	3	NO	-	0	0	0	0	0	0	0	0	0	0	3	0	0	0	0	0	0	0	0	0	0	0	0	0	0	0	0	0	0	0	0	1	Non-Spinose_Neogloboquadrina_pachyderma_I_NA_NA	Non-Spinose	Neogloboquadrina	pachyderma	I	NAAY305329_Non-Spinose_Neogloboquadrina_pachyderma_I_NA_NA;	-	-	-	-	-
ISU1130	1	2	NO	-	0	0	0	0	0	2	0	0	0	0	0	0	0	0	0	0	0	0	0	0	0	0	0	0	0	0	0	0	0	0	0	2	Microperforates_Globigerinita_glutinata	Microperforates	Globigerinita	glutinata	-	KM193151_Microperforates_Globigerinita_glutinata_NA_NA_NA;FJ643294_Microperforates_Globigerinita_glutinata_I_NA_NA;KM193497_Microperforates_Globigerinita_glutinata_NA_NA_NA;	-	-	-	-	-
ISU1131	1	2	NO	-	0	0	0	0	0	0	0	0	0	0	0	0	0	0	0	0	0	0	2	0	0	0	0	0	0	0	0	0	0	0	0	1	Microperforates_Globigerinita_glutinata	Microperforates	Globigerinita	glutinata	-	JQ799900_Microperforates_Globigerinita_glutinata_IV_NA_NA;FJ643296_Microperforates_Globigerinita_glutinata_III_NA_NA;FJ643277_Microperforates_Globigerinita_glutinata_III_NA_NA;KM193199_Microperforates_Globigerinita_glutinata_NA_NA_NA;AY453136_Microperforates_Globigerinita_glutinata_III_NA_NA;	-	-	-	-	-
ISU1132	2	4	Yes	R-662_2_4_1	0	0	0	0	0	2	0	0	0	0	0	0	0	0	0	0	0	0	0	2	0	0	0	0	0	0	0	0	0	0	0	1	Microperforates_Candeina_nitida_NA_NA_NA	Microperforates	Candeina	nitida	NA	NAAB263435_Microperforates_Candeina_nitida_NA_NA_NA;	Microperforates	Globigerinita	glutinata	III	Microperforates_Globigerinita_glutinata_III
ISU1133	1	2	NO	-	0	0	0	0	0	0	0	0	0	0	0	0	0	0	0	0	0	0	0	2	0	0	0	0	0	0	0	0	0	0	0	1	Microperforates_Candeina_nitida_NA_NA_NA	Microperforates	Candeina	nitida	NA	NAAB263435_Microperforates_Candeina_nitida_NA_NA_NA;	-	-	-	-	-
ISU1134	3	46	Yes	R-203_3_46_7	0	0	0	0	0	28	0	0	0	0	0	0	0	0	0	0	0	0	0	11	0	7	0	0	0	0	0	0	0	0	0	7	Microperforates_Globigerinita_glutinata	Microperforates	Globigerinita	glutinata	-	FJ643286_Microperforates_Globigerinita_glutinata_I_NA_NA;KM193484_Microperforates_Globigerinita_glutinata_NA_NA_NA	Microperforates	Globigerinita	glutinata	III	Microperforates_Globigerinita_glutinata_III
ISU1135	4	8	Yes	R-509_4_8_1	0	0	0	0	2	2	0	0	0	0	0	0	0	0	0	0	0	0	2	2	0	0	0	0	0	0	0	0	0	0	0	1	Microperforates_Globigerinita_glutinata_III_NA_NA	Microperforates	Globigerinita	glutinata	III	NAFJ643277_Microperforates_Globigerinita_glutinata_III_NA_NA;	Microperforates	Globigerinita	glutinata	III	Microperforates_Globigerinita_glutinata_III
ISU1136	4	53	Yes	R-178_4_53_1	0	0	0	0	0	43	0	0	0	0	0	0	0	0	0	0	0	0	4	3	0	3	0	0	0	0	0	0	0	0	0	1	Microperforates_Globigerinita_glutinata_III_NA_NA	Microperforates	Globigerinita	glutinata	III	NAFJ643283_Microperforates_Globigerinita_glutinata_III_NA_NA;	Microperforates	Globigerinita	glutinata	III	Microperforates_Globigerinita_glutinata_III
ISU1137	1	2	NO	-	0	0	0	0	0	2	0	0	0	0	0	0	0	0	0	0	0	0	0	0	0	0	0	0	0	0	0	0	0	0	0	1	Monolamellar_Hastigerina_pelagica	Monolamellar	Hastigerina	pelagica	-	FJ643408_Monolamellar_Hastigerina_pelagica_II_a_NA;KM194103_Monolamellar_Hastigerina_pelagica_NA_NA_NA;FJ643367_Monolamellar_Hastigerina_pelagica_II_a_NA;FJ643402_Monolamellar_Hastigerina_pelagica_NA_NA_NA	-	-	-	-	-
ISU1138	1	2	NO	-	0	0	0	0	0	2	0	0	0	0	0	0	0	0	0	0	0	0	0	0	0	0	0	0	0	0	0	0	0	0	0	4	Microperforates_Globigerinita_glutinata	Microperforates	Globigerinita	glutinata	-	FJ643286_Microperforates_Globigerinita_glutinata_I_NA_NA;KM193484_Microperforates_Globigerinita_glutinata_NA_NA_NA	-	-	-	-	-
ISU1139	1	3	NO	-	0	0	0	0	0	0	0	0	0	0	0	0	0	0	0	0	0	0	0	0	0	0	0	0	0	0	0	0	3	0	0	1	Non-Spinose_Neogloboquadrina_pachyderma_IV_NA_NA	Non-Spinose	Neogloboquadrina	pachyderma	IV	NAKM193550_Non-Spinose_Neogloboquadrina_pachyderma_IV_NA_NA;KM193530_Non-Spinose_Neogloboquadrina_pachyderma_IV_NA_NA;KM193284_Non-Spinose_Neogloboquadrina_pachyderma_IV_NA_NA;KM193861_Non-Spinose_Neogloboquadrina_pachyderma_IV_NA_NA;KM193614_Non-Spinose_Neogloboquadrina_pachyderma_IV_NA_NA;KM193889_Non-Spinose_Neogloboquadrina_pachyderma_IV_NA_NA;KM193556_Non-Spinose_Neogloboquadrina_pachyderma_…	-	-	-	-	-
ISU114	1	3	NO	-	0	0	0	0	0	0	0	0	0	0	0	0	0	0	0	0	0	0	0	0	0	3	0	0	0	0	0	0	0	0	0	2	Microperforates_Globigerinita_glutinata	Microperforates	Globigerinita	glutinata	-	KM193484_Microperforates_Globigerinita_glutinata_NA_NA_NA;FJ643286_Microperforates_Globigerinita_glutinata_I_NA_NA	-	-	-	-	-
ISU1140	1	2	NO	-	0	0	0	0	0	2	0	0	0	0	0	0	0	0	0	0	0	0	0	0	0	0	0	0	0	0	0	0	0	0	0	2	Microperforates_Globigerinita_uvula	Microperforates	Globigerinita	uvula	-	FJ643298_Microperforates_Globigerinita_uvula_I_NA_NA;KM193070_Microperforates_Globigerinita_uvula_NA_NA_NA;KM193079_Microperforates_Globigerinita_uvula_NA_NA_NA;	-	-	-	-	-
ISU1141	2	7	Yes	R-520_2_7_5	0	0	0	0	0	0	0	0	0	0	0	0	0	0	0	0	0	0	2	5	0	0	0	0	0	0	0	0	0	0	0	5	Microperforates_Globigerinita_uvula	Microperforates	Globigerinita	uvula	-	FJ643298_Microperforates_Globigerinita_uvula_I_NA_NA;KM193070_Microperforates_Globigerinita_uvula_NA_NA_NA;KM193079_Microperforates_Globigerinita_uvula_NA_NA_NA;	Microperforates	Globigerinita	uvula	I	Microperforates_Globigerinita_uvula_I
ISU1142	5	135	Yes	R-101_5_135_1	0	0	0	0	6	50	0	0	0	0	0	0	0	0	0	0	0	0	25	27	0	27	0	0	0	0	0	0	0	0	0	1	Microperforates_Globigerinita_glutinata_III_NA_NA	Microperforates	Globigerinita	glutinata	III	NAFJ643283_Microperforates_Globigerinita_glutinata_III_NA_NA;	Microperforates	Globigerinita	glutinata	III	Microperforates_Globigerinita_glutinata_III
ISU1143	5	20	Yes	R-329_5_20_1	0	0	0	0	3	3	0	0	0	0	0	0	0	0	0	0	0	0	2	9	0	3	0	0	0	0	0	0	0	0	0	1	Microperforates_Globigerinita_glutinata	Microperforates	Globigerinita	glutinata	-	FJ643296_Microperforates_Globigerinita_glutinata_III_NA_NA;KM193199_Microperforates_Globigerinita_glutinata_NA_NA_NA;FJ643277_Microperforates_Globigerinita_glutinata_III_NA_NA;AY453136_Microperforates_Globigerinita_glutinata_III_NA_NA;JQ799900_Microperforates_Globigerinita_glutinata_IV_NA_NA;	Microperforates	Globigerinita	glutinata	III	Microperforates_Globigerinita_glutinata_III
ISU1144	1	3	NO	-	0	0	0	0	0	0	0	0	0	0	0	0	0	0	0	0	0	0	0	3	0	0	0	0	0	0	0	0	0	0	0	3	Microperforates_Globigerinita_glutinata	Microperforates	Globigerinita	glutinata	-	KM193151_Microperforates_Globigerinita_glutinata_NA_NA_NA;KM193497_Microperforates_Globigerinita_glutinata_NA_NA_NA;FJ643294_Microperforates_Globigerinita_glutinata_I_NA_NA;	-	-	-	-	-
ISU1145	4	12	Yes	R-418_4_12_5	0	0	0	0	2	5	0	0	0	0	0	0	0	0	0	0	0	0	2	3	0	0	0	0	0	0	0	0	0	0	0	5	Microperforates_Globigerinita_uvula	Microperforates	Globigerinita	uvula	-	FJ643298_Microperforates_Globigerinita_uvula_I_NA_NA;KM193160_Microperforates_Globigerinita_uvula_NA_NA_NA;KM193079_Microperforates_Globigerinita_uvula_NA_NA_NA;KM193075_Microperforates_Globigerinita_uvula_NA_NA_NA;KM193070_Microperforates_Globigerinita_uvula_NA_NA_NA;	Microperforates	Globigerinita	uvula	I	Microperforates_Globigerinita_uvula_I
ISU1146	2	9	Yes	R-485_2_9_1	0	0	0	0	0	4	0	0	0	0	0	0	0	0	0	0	0	0	0	5	0	0	0	0	0	0	0	0	0	0	0	1	Microperforates_Candeina_nitida_NA_NA_NA	Microperforates	Candeina	nitida	NA	NAAB263435_Microperforates_Candeina_nitida_NA_NA_NA;	Microperforates	Candeina	nitida	I	Microperforates_Candeina_nitida_I
ISU1147	1	2	NO	-	0	0	0	0	0	0	0	0	0	0	0	0	0	0	0	0	0	0	0	2	0	0	0	0	0	0	0	0	0	0	0	1	Microperforates_Globigerinita_glutinata	Microperforates	Globigerinita	glutinata	-	FJ643418_Microperforates_Globigerinita_glutinata_NA_NA_NA;AB468827_Microperforates_Globigerinita_glutinata_II_NA_NA;AB468829_Microperforates_Globigerinita_glutinata_II_NA_NA;	-	-	-	-	-
ISU1148	2	5	Yes	R-633_2_5_4	0	0	0	0	0	0	0	0	0	0	0	0	0	0	0	0	0	0	0	2	0	3	0	0	0	0	0	0	0	0	0	4	Microperforates_Globigerinita_glutinata	Microperforates	Globigerinita	glutinata	-	JQ799900_Microperforates_Globigerinita_glutinata_IV_NA_NA;FJ643288_Microperforates_Globigerinita_glutinata_I_NA_NA;KM193539_Microperforates_Globigerinita_glutinata_NA_NA_NA;FJ643296_Microperforates_Globigerinita_glutinata_III_NA_NA;FJ643277_Microperforates_Globigerinita_glutinata_III_NA_NA;KM193303_Microperforates_Globigerinita_glutinata_NA_NA_NA;KM193199_Microperforates_Globigerinita_glutinata_N…	Microperforates	Globigerinita	glutinata	III	Microperforates_Globigerinita_glutinata_III
ISU1149	5	468	Yes	R-40_5_468_1	0	0	0	0	4	93	0	0	0	0	0	0	0	0	0	0	0	0	330	12	0	29	0	0	0	0	0	0	0	0	0	1	Microperforates_Globigerinita_glutinata_III_NA_NA	Microperforates	Globigerinita	glutinata	III	NAFJ643283_Microperforates_Globigerinita_glutinata_III_NA_NA;	Microperforates	Globigerinita	glutinata	III	Microperforates_Globigerinita_glutinata_III
ISU115	2	8	Yes	R-513_2_8_1	0	0	0	0	0	3	0	0	0	0	0	0	0	0	0	0	0	0	0	5	0	0	0	0	0	0	0	0	0	0	0	1	Microperforates_Globigerinita_glutinata_III_NA_NA	Microperforates	Globigerinita	glutinata	III	NAFJ643283_Microperforates_Globigerinita_glutinata_III_NA_NA;	Microperforates	Globigerinita	glutinata	III	Microperforates_Globigerinita_glutinata_III
ISU1150	1	2	NO	-	0	0	0	0	0	2	0	0	0	0	0	0	0	0	0	0	0	0	0	0	0	0	0	0	0	0	0	0	0	0	0	2	Microperforates_Globigerinita_glutinata	Microperforates	Globigerinita	glutinata	-	JQ799900_Microperforates_Globigerinita_glutinata_IV_NA_NA;FJ643296_Microperforates_Globigerinita_glutinata_III_NA_NA;KM193199_Microperforates_Globigerinita_glutinata_NA_NA_NA;AY453136_Microperforates_Globigerinita_glutinata_III_NA_NA	-	-	-	-	-
ISU1151	2	4	Yes	R-694_2_4_2	0	0	0	0	0	2	0	0	0	0	0	0	0	0	0	0	0	0	0	2	0	0	0	0	0	0	0	0	0	0	0	2	Microperforates_Globigerinita_glutinata	Microperforates	Globigerinita	glutinata	-	FJ643294_Microperforates_Globigerinita_glutinata_I_NA_NA;KM193497_Microperforates_Globigerinita_glutinata_NA_NA_NA;FJ643283_Microperforates_Globigerinita_glutinata_III_NA_NA;KM193151_Microperforates_Globigerinita_glutinata_NA_NA_NA	Microperforates	Globigerinita	glutinata	III	Microperforates_Globigerinita_glutinata_III
ISU1152	4	16	Yes	R-369_4_16_1	0	0	0	0	0	5	0	0	0	0	0	0	0	0	0	0	0	0	2	4	0	5	0	0	0	0	0	0	0	0	0	1	Microperforates_Globigerinita_glutinata	Microperforates	Globigerinita	glutinata	-	JQ799900_Microperforates_Globigerinita_glutinata_IV_NA_NA;FJ643296_Microperforates_Globigerinita_glutinata_III_NA_NA;KM193199_Microperforates_Globigerinita_glutinata_NA_NA_NA;AY453136_Microperforates_Globigerinita_glutinata_III_NA_NA	Microperforates	Globigerinita	glutinata	III	Microperforates_Globigerinita_glutinata_III
ISU1153	1	2	NO	-	0	0	0	0	0	0	0	0	0	0	0	0	0	0	0	0	0	0	0	0	0	2	0	0	0	0	0	0	0	0	0	6	Microperforates_Globigerinita_glutinata	Microperforates	Globigerinita	glutinata	-	FJ643277_Microperforates_Globigerinita_glutinata_III_NA_NA;FJ643296_Microperforates_Globigerinita_glutinata_III_NA_NA;JQ799900_Microperforates_Globigerinita_glutinata_IV_NA_NA;KM193539_Microperforates_Globigerinita_glutinata_NA_NA_NA;KM193303_Microperforates_Globigerinita_glutinata_NA_NA_NA;KM193199_Microperforates_Globigerinita_glutinata_NA_NA_NA;AY453136_Microperforates_Globigerinita_glutinata_…	-	-	-	-	-
ISU1154	1	3	NO	-	0	0	0	0	0	0	0	0	0	0	0	0	0	0	0	0	0	0	0	3	0	0	0	0	0	0	0	0	0	0	0	4	Microperforates_Candeina_nitida_NA_NA_NA	Microperforates	Candeina	nitida	NA	NAAB468837_Microperforates_Candeina_nitida_NA_NA_NA;AB468836_Microperforates_Candeina_nitida_NA_NA_NA;KJ633212_Microperforates_Candeina_nitida_NA_NA_NA;AB263435_Microperforates_Candeina_nitida_NA_NA_NA	-	-	-	-	-
ISU1155	5	70	Yes	R-154_5_70_1	0	0	0	0	5	37	0	0	0	0	0	0	0	0	0	0	0	0	9	8	0	11	0	0	0	0	0	0	0	0	0	1	Microperforates_Globigerinita_glutinata_III_NA_NA	Microperforates	Globigerinita	glutinata	III	NAFJ643277_Microperforates_Globigerinita_glutinata_III_NA_NA;	Microperforates	Globigerinita	glutinata	III	Microperforates_Globigerinita_glutinata_III
ISU1156	1	2	NO	-	0	0	0	0	0	0	0	0	0	0	0	0	0	0	0	0	0	0	0	0	0	0	0	0	0	2	0	0	0	0	0	1	Non-Spinose_Neogloboquadrina_pachyderma_I_NA_NA	Non-Spinose	Neogloboquadrina	pachyderma	I	NAAY305329_Non-Spinose_Neogloboquadrina_pachyderma_I_NA_NA;	-	-	-	-	-
ISU1157	2	5	Yes	R-638_2_5_1	0	0	0	0	0	0	0	0	0	0	0	0	0	0	0	0	0	0	2	0	0	3	0	0	0	0	0	0	0	0	0	1	Microperforates_Globigerinita_glutinata	Microperforates	Globigerinita	glutinata	-	AB468829_Microperforates_Globigerinita_glutinata_II_NA_NA;AB468827_Microperforates_Globigerinita_glutinata_II_NA_NA;FJ643418_Microperforates_Globigerinita_glutinata_NA_NA_NA;	Microperforates	Globigerinita	glutinata	I	Microperforates_Globigerinita_glutinata_I
ISU1158	2	9	Yes	R-489_2_9_1	0	0	0	0	0	0	0	0	0	0	0	0	0	0	0	0	0	0	0	5	0	4	0	0	0	0	0	0	0	0	0	1	Microperforates_Globigerinita_glutinata	Microperforates	Globigerinita	glutinata	-	FJ643418_Microperforates_Globigerinita_glutinata_NA_NA_NA;AB468827_Microperforates_Globigerinita_glutinata_II_NA_NA;AB468829_Microperforates_Globigerinita_glutinata_II_NA_NA;	Microperforates	Globigerinita	glutinata	II	Microperforates_Globigerinita_glutinata_II
ISU1159	5	51	Yes	R-183_5_51_1	0	0	0	0	4	15	0	0	0	0	0	0	0	0	0	0	0	0	12	10	0	10	0	0	0	0	0	0	0	0	0	1	Microperforates_Globigerinita_glutinata_III_NA_NA	Microperforates	Globigerinita	glutinata	III	NAFJ643283_Microperforates_Globigerinita_glutinata_III_NA_NA;	Microperforates	Globigerinita	glutinata	III	Microperforates_Globigerinita_glutinata_III
ISU116	5	122	Yes	R-105_5_122_1	0	0	0	0	7	44	0	0	0	0	0	0	0	0	0	0	0	0	15	25	0	31	0	0	0	0	0	0	0	0	0	1	Microperforates_Globigerinita_glutinata_III_NA_NA	Microperforates	Globigerinita	glutinata	III	NAFJ643283_Microperforates_Globigerinita_glutinata_III_NA_NA;	Microperforates	Globigerinita	glutinata	III	Microperforates_Globigerinita_glutinata_III
ISU1160	1	3	NO	-	0	0	0	0	0	0	0	0	0	0	0	0	0	0	0	0	0	0	0	3	0	0	0	0	0	0	0	0	0	0	0	2	Microperforates_Globigerinita_glutinata_III_NA_NA	Microperforates	Globigerinita	glutinata	III	NAFJ643283_Microperforates_Globigerinita_glutinata_III_NA_NA;	-	-	-	-	-
ISU1161	1	2	NO	-	0	0	0	0	0	0	0	0	0	0	0	0	0	0	0	0	0	0	0	2	0	0	0	0	0	0	0	0	0	0	0	1	Microperforates_Globigerinita_uvula	Microperforates	Globigerinita	uvula	-	FJ643298_Microperforates_Globigerinita_uvula_I_NA_NA;KM193070_Microperforates_Globigerinita_uvula_NA_NA_NA;KM193079_Microperforates_Globigerinita_uvula_NA_NA_NA;	-	-	-	-	-
ISU1162	2	6	Yes	R-581_2_6_6	0	0	0	0	3	0	0	0	0	0	0	0	0	0	0	0	0	0	0	0	0	3	0	0	0	0	0	0	0	0	0	6	Microperforates_Globigerinita_glutinata	Microperforates	Globigerinita	glutinata	-	JQ799900_Microperforates_Globigerinita_glutinata_IV_NA_NA;FJ643288_Microperforates_Globigerinita_glutinata_I_NA_NA;KM193303_Microperforates_Globigerinita_glutinata_NA_NA_NA;FJ643296_Microperforates_Globigerinita_glutinata_III_NA_NA;FJ643277_Microperforates_Globigerinita_glutinata_III_NA_NA;KM193539_Microperforates_Globigerinita_glutinata_NA_NA_NA;KM193199_Microperforates_Globigerinita_glutinata_N…	Microperforates	Globigerinita	glutinata	III	Microperforates_Globigerinita_glutinata_III
ISU1163	2	4	Yes	R-663_2_4_5	0	0	0	0	0	2	0	0	0	0	0	0	0	0	0	0	0	0	0	2	0	0	0	0	0	0	0	0	0	0	0	5	Microperforates_Globigerinita_uvula	Microperforates	Globigerinita	uvula	-	FJ643298_Microperforates_Globigerinita_uvula_I_NA_NA;KM193079_Microperforates_Globigerinita_uvula_NA_NA_NA;KM193070_Microperforates_Globigerinita_uvula_NA_NA_NA;	Microperforates	Globigerinita	glutinata	III	Microperforates_Globigerinita_glutinata_III
ISU1164	7	1832	Yes	R-22_7_1832_2	0	0	0	12	65	885	0	0	0	22	0	0	0	0	0	0	0	0	273	318	0	257	0	0	0	0	0	0	0	0	0	2	Microperforates_Globigerinita_glutinata_III_NA_NA	Microperforates	Globigerinita	glutinata	III	NAFJ643283_Microperforates_Globigerinita_glutinata_III_NA_NA;	Microperforates	Globigerinita	glutinata	III	Microperforates_Globigerinita_glutinata_III
ISU1165	1	2	NO	-	0	0	0	0	0	2	0	0	0	0	0	0	0	0	0	0	0	0	0	0	0	0	0	0	0	0	0	0	0	0	0	5	Microperforates_Globigerinita_uvula	Microperforates	Globigerinita	uvula	-	FJ643298_Microperforates_Globigerinita_uvula_I_NA_NA;KM193079_Microperforates_Globigerinita_uvula_NA_NA_NA;KM193070_Microperforates_Globigerinita_uvula_NA_NA_NA;	-	-	-	-	-
ISU1166	3	17	Yes	R-360_3_17_1	0	0	0	0	0	5	0	0	0	0	0	0	0	0	0	0	0	0	0	4	0	8	0	0	0	0	0	0	0	0	0	1	Microperforates_Globigerinita_glutinata_III_NA_NA	Microperforates	Globigerinita	glutinata	III	NAFJ643283_Microperforates_Globigerinita_glutinata_III_NA_NA;	Microperforates	Globigerinita	glutinata	III	Microperforates_Globigerinita_glutinata_III
ISU1167	5	58	Yes	R-168_5_58_1	0	0	0	0	3	11	0	0	0	0	0	0	0	0	0	0	0	0	9	21	0	14	0	0	0	0	0	0	0	0	0	1	Microperforates_Globigerinita_glutinata	Microperforates	Globigerinita	glutinata	-	FJ643296_Microperforates_Globigerinita_glutinata_III_NA_NA;AY453136_Microperforates_Globigerinita_glutinata_III_NA_NA;KM193199_Microperforates_Globigerinita_glutinata_NA_NA_NA;JQ799900_Microperforates_Globigerinita_glutinata_IV_NA_NA	Microperforates	Globigerinita	glutinata	III	Microperforates_Globigerinita_glutinata_III
ISU1168	2	5	Yes	R-621_2_5_1	2	0	0	0	0	0	0	0	0	0	0	0	0	0	0	0	0	0	0	0	0	0	0	0	0	0	0	0	0	0	3	1	Microperforates_Globigerinita_uvula	Microperforates	Globigerinita	uvula	-	KM193181_Microperforates_Globigerinita_uvula_NA_NA_NA;KM193691_Microperforates_Globigerinita_uvula_NA_NA_NA;KM193364_Microperforates_Globigerinita_uvula_NA_NA_NA;AF387173_Microperforates_Globigerinita_uvula_II_NA_NA;KM194324_Microperforates_Globigerinita_uvula_NA_NA_NA;	Microperforates	Globigerinita	uvula	II	Microperforates_Globigerinita_uvula_II
ISU1169	5	43	Yes	R-211_5_43_1	0	0	0	0	2	12	0	0	0	0	0	0	0	0	0	0	0	0	7	9	0	13	0	0	0	0	0	0	0	0	0	1	Microperforates_Globigerinita_glutinata	Microperforates	Globigerinita	glutinata	-	FJ643296_Microperforates_Globigerinita_glutinata_III_NA_NA;KM193199_Microperforates_Globigerinita_glutinata_NA_NA_NA;FJ643277_Microperforates_Globigerinita_glutinata_III_NA_NA;AY453136_Microperforates_Globigerinita_glutinata_III_NA_NA;JQ799900_Microperforates_Globigerinita_glutinata_IV_NA_NA;	Microperforates	Globigerinita	glutinata	III	Microperforates_Globigerinita_glutinata_III
ISU117	1	2	NO	-	0	0	0	0	0	0	0	0	0	0	0	0	0	0	0	0	0	0	0	0	0	2	0	0	0	0	0	0	0	0	0	4	Microperforates_Globigerinita_glutinata	Microperforates	Globigerinita	glutinata	-	FJ643286_Microperforates_Globigerinita_glutinata_I_NA_NA;KM193484_Microperforates_Globigerinita_glutinata_NA_NA_NA	-	-	-	-	-
ISU1170	5	49	Yes	R-188_5_49_1	0	0	0	0	2	9	0	0	0	0	0	0	0	0	0	0	0	0	5	18	0	15	0	0	0	0	0	0	0	0	0	1	Microperforates_Globigerinita_glutinata	Microperforates	Globigerinita	glutinata	-	FJ643296_Microperforates_Globigerinita_glutinata_III_NA_NA;KM193199_Microperforates_Globigerinita_glutinata_NA_NA_NA;FJ643277_Microperforates_Globigerinita_glutinata_III_NA_NA;AY453136_Microperforates_Globigerinita_glutinata_III_NA_NA;JQ799900_Microperforates_Globigerinita_glutinata_IV_NA_NA;	Microperforates	Globigerinita	glutinata	III	Microperforates_Globigerinita_glutinata_III
ISU1171	9	11502	Yes	R-6_9_11502_3	0	0	0	123	1454	4836	0	0	2	0	2	0	0	0	0	0	0	0	1386	1616	0	2081	0	0	2	0	0	0	0	0	0	3	Microperforates_Globigerinita_glutinata	Microperforates	Globigerinita	glutinata	-	FJ643286_Microperforates_Globigerinita_glutinata_I_NA_NA;KM193484_Microperforates_Globigerinita_glutinata_NA_NA_NA	Microperforates	Globigerinita	glutinata	I	Microperforates_Globigerinita_glutinata_I
ISU1172	3	12	Yes	R-426_3_12_3	0	0	0	0	2	0	0	0	0	0	0	0	0	0	0	0	0	0	0	4	0	6	0	0	0	0	0	0	0	0	0	3	Microperforates_Globigerinita_glutinata	Microperforates	Globigerinita	glutinata	-	KM193151_Microperforates_Globigerinita_glutinata_NA_NA_NA;KM193497_Microperforates_Globigerinita_glutinata_NA_NA_NA;FJ643294_Microperforates_Globigerinita_glutinata_I_NA_NA;	Microperforates	Globigerinita	glutinata	I	Microperforates_Globigerinita_glutinata_I
ISU1173	1	2	NO	-	0	0	0	0	0	0	0	0	0	0	0	0	0	0	0	0	0	0	0	0	0	2	0	0	0	0	0	0	0	0	0	4	Microperforates_Globigerinita_glutinata	Microperforates	Globigerinita	glutinata	-	FJ643286_Microperforates_Globigerinita_glutinata_I_NA_NA;KM193484_Microperforates_Globigerinita_glutinata_NA_NA_NA	-	-	-	-	-
ISU1174	1	6	NO	-	0	0	0	0	0	0	0	0	0	0	0	0	0	0	0	0	0	0	0	0	0	0	0	0	0	0	0	0	6	0	0	1	Non-Spinose_Neogloboquadrina_pachyderma_IV_NA_NA	Non-Spinose	Neogloboquadrina	pachyderma	IV	NAKM193680_Non-Spinose_Neogloboquadrina_pachyderma_IV_NA_NA;	-	-	-	-	-
ISU1175	1	2	NO	-	0	0	0	0	0	2	0	0	0	0	0	0	0	0	0	0	0	0	0	0	0	0	0	0	0	0	0	0	0	0	0	2	Microperforates_Globigerinita_glutinata	Microperforates	Globigerinita	glutinata	-	FJ643294_Microperforates_Globigerinita_glutinata_I_NA_NA;KM193497_Microperforates_Globigerinita_glutinata_NA_NA_NA;FJ643283_Microperforates_Globigerinita_glutinata_III_NA_NA;KM193151_Microperforates_Globigerinita_glutinata_NA_NA_NA	-	-	-	-	-
ISU1176	3	12	Yes	R-424_3_12_4	0	0	0	0	3	7	0	0	0	0	0	0	0	0	0	0	0	0	0	0	0	2	0	0	0	0	0	0	0	0	0	4	Microperforates_Globigerinita_glutinata	Microperforates	Globigerinita	glutinata	-	KM193484_Microperforates_Globigerinita_glutinata_NA_NA_NA;FJ643286_Microperforates_Globigerinita_glutinata_I_NA_NA	Microperforates	Globigerinita	glutinata	I	Microperforates_Globigerinita_glutinata_I
ISU1177	3	11	Yes	R-430_3_11_4	0	0	0	0	0	3	0	0	0	0	0	0	0	0	0	0	0	0	2	6	0	0	0	0	0	0	0	0	0	0	0	4	Microperforates_Globigerinita_uvula	Microperforates	Globigerinita	uvula	-	FJ643298_Microperforates_Globigerinita_uvula_I_NA_NA;KM193079_Microperforates_Globigerinita_uvula_NA_NA_NA;KM193070_Microperforates_Globigerinita_uvula_NA_NA_NA;	Microperforates	Globigerinita	uvula	I	Microperforates_Globigerinita_uvula_I
ISU1178	1	2	NO	-	0	0	0	0	0	0	0	0	0	0	0	0	0	0	0	0	0	0	0	2	0	0	0	0	0	0	0	0	0	0	0	1	Microperforates_Globigerinita_glutinata_III_NA_NA	Microperforates	Globigerinita	glutinata	III	NAFJ643277_Microperforates_Globigerinita_glutinata_III_NA_NA;	-	-	-	-	-
ISU1179	4	30	Yes	R-262_4_30_1	0	0	0	0	0	3	0	0	0	0	0	0	0	0	0	0	0	0	8	8	0	11	0	0	0	0	0	0	0	0	0	1	Microperforates_Globigerinita_glutinata	Microperforates	Globigerinita	glutinata	-	JQ799900_Microperforates_Globigerinita_glutinata_IV_NA_NA;FJ643296_Microperforates_Globigerinita_glutinata_III_NA_NA;KM193199_Microperforates_Globigerinita_glutinata_NA_NA_NA;AY453136_Microperforates_Globigerinita_glutinata_III_NA_NA	Microperforates	Globigerinita	glutinata	III	Microperforates_Globigerinita_glutinata_III
ISU118	1	2	NO	-	0	0	0	0	0	2	0	0	0	0	0	0	0	0	0	0	0	0	0	0	0	0	0	0	0	0	0	0	0	0	0	5	Microperforates_Globigerinita_uvula	Microperforates	Globigerinita	uvula	-	FJ643298_Microperforates_Globigerinita_uvula_I_NA_NA;KM193079_Microperforates_Globigerinita_uvula_NA_NA_NA;KM193070_Microperforates_Globigerinita_uvula_NA_NA_NA;	-	-	-	-	-
ISU1180	1	6	NO	-	6	0	0	0	0	0	0	0	0	0	0	0	0	0	0	0	0	0	0	0	0	0	0	0	0	0	0	0	0	0	0	1	Microperforates_Globigerinita_uvula	Microperforates	Globigerinita	uvula	-	KM193181_Microperforates_Globigerinita_uvula_NA_NA_NA;KM193691_Microperforates_Globigerinita_uvula_NA_NA_NA;KM193364_Microperforates_Globigerinita_uvula_NA_NA_NA;AF387173_Microperforates_Globigerinita_uvula_II_NA_NA;KM194324_Microperforates_Globigerinita_uvula_NA_NA_NA;	-	-	-	-	-
ISU1181	1	3	NO	-	0	0	0	0	0	0	0	0	0	0	0	0	0	0	0	0	0	0	0	0	0	0	0	0	0	0	0	0	3	0	0	4	Non-Spinose_Neogloboquadrina_pachyderma_IV_NA_NA	Non-Spinose	Neogloboquadrina	pachyderma	IV	NAKM193680_Non-Spinose_Neogloboquadrina_pachyderma_IV_NA_NA;	-	-	-	-	-
ISU1182	1	6	NO	-	0	0	0	0	0	0	0	0	0	0	0	0	0	0	0	0	0	0	0	0	0	0	0	0	0	0	0	0	6	0	0	1	Non-Spinose_Neogloboquadrina_pachyderma_IV_NA_NA	Non-Spinose	Neogloboquadrina	pachyderma	IV	NAKM193680_Non-Spinose_Neogloboquadrina_pachyderma_IV_NA_NA;	-	-	-	-	-
ISU1183	1	2	NO	-	0	0	0	0	0	0	0	0	0	0	0	0	0	0	0	0	0	0	0	0	0	0	0	0	0	0	0	0	2	0	0	1	Non-Spinose_Neogloboquadrina_pachyderma_IV_NA_NA	Non-Spinose	Neogloboquadrina	pachyderma	IV	NAKM193550_Non-Spinose_Neogloboquadrina_pachyderma_IV_NA_NA;KM193530_Non-Spinose_Neogloboquadrina_pachyderma_IV_NA_NA;KM193284_Non-Spinose_Neogloboquadrina_pachyderma_IV_NA_NA;KM193861_Non-Spinose_Neogloboquadrina_pachyderma_IV_NA_NA;KM193614_Non-Spinose_Neogloboquadrina_pachyderma_IV_NA_NA;KM193889_Non-Spinose_Neogloboquadrina_pachyderma_IV_NA_NA;KM193556_Non-Spinose_Neogloboquadrina_pachyderma_…	-	-	-	-	-
ISU1184	1	3	NO	-	0	0	0	0	0	3	0	0	0	0	0	0	0	0	0	0	0	0	0	0	0	0	0	0	0	0	0	0	0	0	0	5	Microperforates_Globigerinita_uvula	Microperforates	Globigerinita	uvula	-	FJ643298_Microperforates_Globigerinita_uvula_I_NA_NA;KM193079_Microperforates_Globigerinita_uvula_NA_NA_NA;KM193070_Microperforates_Globigerinita_uvula_NA_NA_NA;	-	-	-	-	-
ISU1185	1	3	NO	-	0	0	0	0	0	0	0	0	0	0	0	0	0	0	0	0	0	0	3	0	0	0	0	0	0	0	0	0	0	0	0	3	Microperforates_Globigerinita_glutinata	Microperforates	Globigerinita	glutinata	-	FJ643294_Microperforates_Globigerinita_glutinata_I_NA_NA;KM193497_Microperforates_Globigerinita_glutinata_NA_NA_NA;FJ643283_Microperforates_Globigerinita_glutinata_III_NA_NA;KM193151_Microperforates_Globigerinita_glutinata_NA_NA_NA	-	-	-	-	-
ISU1186	12	23719	Yes	R-4_12_23719_0	100	197	209	0	5	0	0	3	8	3766	11111	3839	0	0	0	75	147	0	0	0	0	0	0	0	0	4259	0	0	0	0	0	0	Non-Spinose_Neogloboquadrina_pachyderma_I_NA_NA	Non-Spinose	Neogloboquadrina	pachyderma	I	NAAY305329_Non-Spinose_Neogloboquadrina_pachyderma_I_NA_NA;	Non-Spinose	Neogloboquadrina	pachyderma	I	Non-Spinose_Neogloboquadrina_pachyderma_I
ISU1187	1	4	NO	-	0	0	0	0	0	0	0	0	0	0	0	0	0	0	0	0	0	0	0	0	0	4	0	0	0	0	0	0	0	0	0	1	Spinose_Globigerina_falconensis_NA_NA_NA	Spinose	Globigerina	falconensis	NA	NAAF387172_Spinose_Globigerina_falconensis_NA_NA_NA;	-	-	-	-	-
ISU1188	10	14644	Yes	R-5_10_14644_4	0	0	0	193	1004	4668	0	0	5	0	3	0	0	0	0	0	0	0	2803	3773	0	2188	4	0	3	0	0	0	0	0	0	4	Microperforates_Globigerinita_uvula	Microperforates	Globigerinita	uvula	-	FJ643298_Microperforates_Globigerinita_uvula_I_NA_NA;KM193070_Microperforates_Globigerinita_uvula_NA_NA_NA;KM193079_Microperforates_Globigerinita_uvula_NA_NA_NA;	Microperforates	Globigerinita	uvula	I	Microperforates_Globigerinita_uvula_I
ISU1189	1	2	NO	-	0	0	0	0	0	2	0	0	0	0	0	0	0	0	0	0	0	0	0	0	0	0	0	0	0	0	0	0	0	0	0	1	Spinose_Globigerina_bulloides	Spinose	Globigerina	bulloides	-	Z83957_Spinose_Globigerina_bulloides_NA_NA_NA;GQ293072_Spinose_Globigerina_bulloides_I_c_NA;GQ293070_Spinose_Globigerina_bulloides_I_d_NA;GU060421_Spinose_Globigerina_bulloides_I_e_NA	-	-	-	-	-
ISU119	2	6	Yes	R-585_2_6_1	0	0	0	0	0	0	0	0	0	0	0	0	0	0	0	0	0	0	2	4	0	0	0	0	0	0	0	0	0	0	0	1	Microperforates_Candeina_nitida_NA_NA_NA	Microperforates	Candeina	nitida	NA	NAAB263435_Microperforates_Candeina_nitida_NA_NA_NA;	Microperforates	Candeina	nitida	I	Microperforates_Candeina_nitida_I
ISU1190	1	3	NO	-	0	0	0	0	0	0	0	0	0	0	0	0	0	0	0	0	0	0	0	3	0	0	0	0	0	0	0	0	0	0	0	5	Microperforates_Globigerinita_uvula	Microperforates	Globigerinita	uvula	-	FJ643298_Microperforates_Globigerinita_uvula_I_NA_NA;KM193160_Microperforates_Globigerinita_uvula_NA_NA_NA;KM193075_Microperforates_Globigerinita_uvula_NA_NA_NA;KM193070_Microperforates_Globigerinita_uvula_NA_NA_NA;KM193079_Microperforates_Globigerinita_uvula_NA_NA_NA;	-	-	-	-	-
ISU1191	5	17	Yes	R-355_5_17_5	0	0	0	0	4	3	0	0	0	0	0	0	0	0	0	0	0	0	2	5	0	3	0	0	0	0	0	0	0	0	0	5	Microperforates_Globigerinita_uvula	Microperforates	Globigerinita	uvula	-	FJ643298_Microperforates_Globigerinita_uvula_I_NA_NA;KM193160_Microperforates_Globigerinita_uvula_NA_NA_NA;KM193079_Microperforates_Globigerinita_uvula_NA_NA_NA;KM193075_Microperforates_Globigerinita_uvula_NA_NA_NA;KM193070_Microperforates_Globigerinita_uvula_NA_NA_NA;	Microperforates	Globigerinita	uvula	I	Microperforates_Globigerinita_uvula_I
ISU1192	5	39	Yes	R-228_5_39_1	0	0	0	0	3	8	0	0	0	0	0	0	0	0	0	0	0	0	6	7	0	15	0	0	0	0	0	0	0	0	0	1	Microperforates_Globigerinita_glutinata	Microperforates	Globigerinita	glutinata	-	FJ643296_Microperforates_Globigerinita_glutinata_III_NA_NA;KM193199_Microperforates_Globigerinita_glutinata_NA_NA_NA;FJ643277_Microperforates_Globigerinita_glutinata_III_NA_NA;AY453136_Microperforates_Globigerinita_glutinata_III_NA_NA;JQ799900_Microperforates_Globigerinita_glutinata_IV_NA_NA;	Microperforates	Globigerinita	glutinata	III	Microperforates_Globigerinita_glutinata_III
ISU1193	1	2	NO	-	0	0	0	0	0	2	0	0	0	0	0	0	0	0	0	0	0	0	0	0	0	0	0	0	0	0	0	0	0	0	0	5	Microperforates_Globigerinita_uvula	Microperforates	Globigerinita	uvula	-	FJ643298_Microperforates_Globigerinita_uvula_I_NA_NA;KM193079_Microperforates_Globigerinita_uvula_NA_NA_NA;KM193070_Microperforates_Globigerinita_uvula_NA_NA_NA;	-	-	-	-	-
ISU1194	2	6	Yes	R-577_2_6_1	0	0	0	0	0	0	0	0	0	0	2	0	0	0	0	0	0	0	0	0	0	0	0	0	0	4	0	0	0	0	0	1	Non-Spinose_Neogloboquadrina_pachyderma_I_NA_NA	Non-Spinose	Neogloboquadrina	pachyderma	I	NAAY305329_Non-Spinose_Neogloboquadrina_pachyderma_I_NA_NA;	Non-Spinose	Neogloboquadrina	pachyderma	I	Non-Spinose_Neogloboquadrina_pachyderma_I
ISU1195	4	12	Yes	R-412_4_12_7	0	0	0	0	3	4	0	0	0	0	0	0	0	0	0	0	0	0	0	2	0	3	0	0	0	0	0	0	0	0	0	7	Microperforates_Globigerinita_uvula	Microperforates	Globigerinita	uvula	-	FJ643298_Microperforates_Globigerinita_uvula_I_NA_NA;KM193160_Microperforates_Globigerinita_uvula_NA_NA_NA;KM193079_Microperforates_Globigerinita_uvula_NA_NA_NA;KM193075_Microperforates_Globigerinita_uvula_NA_NA_NA;KM193070_Microperforates_Globigerinita_uvula_NA_NA_NA;	Microperforates	Globigerinita	uvula	I	Microperforates_Globigerinita_uvula_I
ISU1196	1	4	NO	-	0	0	0	0	0	0	0	0	0	0	0	0	0	0	0	0	0	0	0	4	0	0	0	0	0	0	0	0	0	0	0	1	Microperforates_Candeina_nitida_NA_NA_NA	Microperforates	Candeina	nitida	NA	NAAB263435_Microperforates_Candeina_nitida_NA_NA_NA;	-	-	-	-	-
ISU1197	5	21	Yes	R-326_5_21_1	0	0	0	0	2	7	0	0	0	0	0	0	0	0	0	0	0	0	4	6	0	2	0	0	0	0	0	0	0	0	0	1	Microperforates_Globigerinita_glutinata	Microperforates	Globigerinita	glutinata	-	FJ643296_Microperforates_Globigerinita_glutinata_III_NA_NA;KM193199_Microperforates_Globigerinita_glutinata_NA_NA_NA;FJ643277_Microperforates_Globigerinita_glutinata_III_NA_NA;AY453136_Microperforates_Globigerinita_glutinata_III_NA_NA;JQ799900_Microperforates_Globigerinita_glutinata_IV_NA_NA;	Microperforates	Globigerinita	glutinata	III	Microperforates_Globigerinita_glutinata_III
ISU1198	2	8	Yes	R-504_2_8_1	0	0	0	0	0	0	0	0	0	2	6	0	0	0	0	0	0	0	0	0	0	0	0	0	0	0	0	0	0	0	0	1	Non-Spinose_Neogloboquadrina_pachyderma_I_NA_NA	Non-Spinose	Neogloboquadrina	pachyderma	I	NAAY305329_Non-Spinose_Neogloboquadrina_pachyderma_I_NA_NA;	Non-Spinose	Neogloboquadrina	pachyderma	I	Non-Spinose_Neogloboquadrina_pachyderma_I
ISU1199	1	3	NO	-	0	0	0	0	0	0	0	0	0	0	0	3	0	0	0	0	0	0	0	0	0	0	0	0	0	0	0	0	0	0	0	2	Non-Spinose_Neogloboquadrina_pachyderma_I_NA_NA	Non-Spinose	Neogloboquadrina	pachyderma	I	NAAY305329_Non-Spinose_Neogloboquadrina_pachyderma_I_NA_NA;	-	-	-	-	-
ISU12	1	2	NO	-	0	0	0	0	0	0	0	0	0	0	0	0	0	0	0	0	0	0	0	0	0	2	0	0	0	0	0	0	0	0	0	1	Spinose_Globigerina_bulloides	Spinose	Globigerina	bulloides	-	GQ293072_Spinose_Globigerina_bulloides_I_c_NA;GU060421_Spinose_Globigerina_bulloides_I_e_NA;GQ293070_Spinose_Globigerina_bulloides_I_d_NA;Z83957_Spinose_Globigerina_bulloides_NA_NA_NA	-	-	-	-	-
ISU120	5	43	Yes	R-210_5_43_1	0	0	0	0	3	10	0	0	0	0	0	0	0	0	0	0	0	0	10	13	0	7	0	0	0	0	0	0	0	0	0	1	Microperforates_Globigerinita_glutinata_III_NA_NA	Microperforates	Globigerinita	glutinata	III	NAFJ643283_Microperforates_Globigerinita_glutinata_III_NA_NA;	Microperforates	Globigerinita	glutinata	III	Microperforates_Globigerinita_glutinata_III
ISU1200	2	222	Yes	R-69_2_222_4	0	0	0	0	0	0	0	0	0	0	0	0	0	0	0	0	0	0	0	0	0	0	0	0	0	0	0	0	0	186	36	4	Non-Spinose_Neogloboquadrina_pachyderma_I_NA_NA	Non-Spinose	Neogloboquadrina	pachyderma	I	NAFJ643298_Microperforates_Globigerinita_uvula_I_NA_NA;KM193070_Microperforates_Globigerinita_uvula_NA_NA_NA;KM193278_Microperforates_Globigerinita_uvula_NA_NA_NA;KM193079_Microperforates_Globigerinita_uvula_NA_NA_NA;KM193160_Microperforates_Globigerinita_uvula_NA_NA_NA;KM193075_Microperforates_Globigerinita_uvula_NA_NA_NA;KM194434_Rotaliida_Rotaliida_sp.2_NA_NA_NA;	Microperforates	Globigerinita	uvula	II	Microperforates_Globigerinita_uvula_II
ISU1201	1	9	NO	-	0	0	0	0	0	9	0	0	0	0	0	0	0	0	0	0	0	0	0	0	0	0	0	0	0	0	0	0	0	0	0	5	Microperforates_Globigerinita_uvula	Microperforates	Globigerinita	uvula	-	FJ643298_Microperforates_Globigerinita_uvula_I_NA_NA;KM193079_Microperforates_Globigerinita_uvula_NA_NA_NA;KM193070_Microperforates_Globigerinita_uvula_NA_NA_NA;	-	-	-	-	-
ISU1202	1	2	NO	-	0	0	0	0	0	0	0	0	0	0	0	0	0	0	0	0	0	0	0	0	0	2	0	0	0	0	0	0	0	0	0	3	Microperforates_Globigerinita_glutinata	Microperforates	Globigerinita	glutinata	-	KM193497_Microperforates_Globigerinita_glutinata_NA_NA_NA;FJ643294_Microperforates_Globigerinita_glutinata_I_NA_NA;KM193151_Microperforates_Globigerinita_glutinata_NA_NA_NA;	-	-	-	-	-
ISU1203	1	2	NO	-	0	0	0	0	0	0	0	0	0	0	0	0	0	2	0	0	0	0	0	0	0	0	0	0	0	0	0	0	0	0	0	5	Spinose_Globigerina_bulloides_II	Spinose	Globigerina	bulloides	II	KM193333_Spinose_Globigerina_bulloides_II_a_NA;AF250106_Spinose_Globigerina_bulloides_II_d_NA;KM193474_Spinose_Globigerina_bulloides_II_b_NA;GQ293069_Spinose_Globigerina_bulloides_II_f_NA;KM193709_Spinose_Globigerina_bulloides_II_c_NA;KM193700_Spinose_Globigerina_bulloides_II_a_NA;AF250111_Spinose_Globigerina_bulloides_II_c_NA;KM193605_Spinose_Globigerina_bulloides_II_a_NA	-	-	-	-	-
ISU1204	1	108	Yes	R-115_1_108_0	0	0	0	0	0	108	0	0	0	0	0	0	0	0	0	0	0	0	0	0	0	0	0	0	0	0	0	0	0	0	0	0	Non-Spiral_Galietelia_vivans_NA_NA_NA	Non-Spiral	Galietelia	vivans	NA	NAAB364519_Non-Spiral_Galietelia_vivans_NA_NA_NA;	Non-Spiral	Gallitellia	vivans	I	Non-Spiral_Gallitellia_vivans_I
ISU1205	1	6	NO	-	0	0	0	0	0	6	0	0	0	0	0	0	0	0	0	0	0	0	0	0	0	0	0	0	0	0	0	0	0	0	0	1	Monolamellar_Hastigerina_pelagica	Monolamellar	Hastigerina	pelagica	-	FJ643408_Monolamellar_Hastigerina_pelagica_II_a_NA;KM194103_Monolamellar_Hastigerina_pelagica_NA_NA_NA;FJ643367_Monolamellar_Hastigerina_pelagica_II_a_NA;FJ643402_Monolamellar_Hastigerina_pelagica_NA_NA_NA	-	-	-	-	-
ISU1206	2	5	Yes	R-643_2_5_1	0	0	0	0	0	2	0	0	0	0	0	0	0	0	0	0	0	0	0	3	0	0	0	0	0	0	0	0	0	0	0	1	Microperforates_Globigerinita_glutinata	Microperforates	Globigerinita	glutinata	-	AB468829_Microperforates_Globigerinita_glutinata_II_NA_NA;AB468827_Microperforates_Globigerinita_glutinata_II_NA_NA;FJ643418_Microperforates_Globigerinita_glutinata_NA_NA_NA;	Microperforates	Globigerinita	glutinata	III	Microperforates_Globigerinita_glutinata_III
ISU1207	1	2	NO	-	0	0	0	2	0	0	0	0	0	0	0	0	0	0	0	0	0	0	0	0	0	0	0	0	0	0	0	0	0	0	0	9	Microperforates_Globigerinita_uvula	Microperforates	Globigerinita	uvula	-	FJ643298_Microperforates_Globigerinita_uvula_I_NA_NA;KM193070_Microperforates_Globigerinita_uvula_NA_NA_NA;KM193079_Microperforates_Globigerinita_uvula_NA_NA_NA;	-	-	-	-	-
ISU1208	1	3	NO	-	0	0	0	0	0	0	0	0	0	0	0	0	0	0	0	0	0	0	3	0	0	0	0	0	0	0	0	0	0	0	0	5	Microperforates_Globigerinita_uvula	Microperforates	Globigerinita	uvula	-	FJ643298_Microperforates_Globigerinita_uvula_I_NA_NA;KM193070_Microperforates_Globigerinita_uvula_NA_NA_NA;KM193079_Microperforates_Globigerinita_uvula_NA_NA_NA;	-	-	-	-	-
ISU1209	1	2	NO	-	0	0	0	0	0	0	0	0	0	0	0	0	0	0	0	0	0	0	0	0	0	2	0	0	0	0	0	0	0	0	0	3	Microperforates_Globigerinita_glutinata	Microperforates	Globigerinita	glutinata	-	KM193497_Microperforates_Globigerinita_glutinata_NA_NA_NA;FJ643294_Microperforates_Globigerinita_glutinata_I_NA_NA;KM193151_Microperforates_Globigerinita_glutinata_NA_NA_NA;	-	-	-	-	-
ISU121	4	26	Yes	R-287_4_26_1	0	0	0	0	0	5	0	0	0	0	0	0	0	0	0	0	0	0	8	7	0	6	0	0	0	0	0	0	0	0	0	1	Microperforates_Globigerinita_glutinata	Microperforates	Globigerinita	glutinata	-	JQ799900_Microperforates_Globigerinita_glutinata_IV_NA_NA;FJ643296_Microperforates_Globigerinita_glutinata_III_NA_NA;KM193199_Microperforates_Globigerinita_glutinata_NA_NA_NA;AY453136_Microperforates_Globigerinita_glutinata_III_NA_NA	Microperforates	Globigerinita	glutinata	III	Microperforates_Globigerinita_glutinata_III
ISU1210	1	4	NO	-	4	0	0	0	0	0	0	0	0	0	0	0	0	0	0	0	0	0	0	0	0	0	0	0	0	0	0	0	0	0	0	1	Microperforates_Globigerinita_uvula	Microperforates	Globigerinita	uvula	-	KM193181_Microperforates_Globigerinita_uvula_NA_NA_NA;KM193691_Microperforates_Globigerinita_uvula_NA_NA_NA;KM193364_Microperforates_Globigerinita_uvula_NA_NA_NA;AF387173_Microperforates_Globigerinita_uvula_II_NA_NA;KM194324_Microperforates_Globigerinita_uvula_NA_NA_NA;	-	-	-	-	-
ISU1211	1	57	Yes	R-169_1_57_9	0	0	0	0	0	0	0	0	57	0	0	0	0	0	0	0	0	0	0	0	0	0	0	0	0	0	0	0	0	0	0	9	Non-Spiral_Galietelia_vivans_NA_NA_NA	Non-Spiral	Galietelia	vivans	NA	NAAB364518_Non-Spiral_Galietelia_vivans_NA_NA_NA;AB364519_Non-Spiral_Galietelia_vivans_NA_NA_NA;AB364517_Non-Spiral_Galietelia_vivans_NA_NA_NA;	Unidentified	Gallitellia	vivans	U4	Unidentified_Gallitellia_vivans_U4
ISU1212	3	6	Yes	R-605_3_6_1	0	0	0	0	0	2	0	0	0	0	0	0	0	0	0	0	0	0	0	2	0	2	0	0	0	0	0	0	0	0	0	1	Microperforates_Globigerinita_glutinata	Microperforates	Globigerinita	glutinata	-	JQ799900_Microperforates_Globigerinita_glutinata_IV_NA_NA;FJ643296_Microperforates_Globigerinita_glutinata_III_NA_NA;KM193199_Microperforates_Globigerinita_glutinata_NA_NA_NA;AY453136_Microperforates_Globigerinita_glutinata_III_NA_NA	Microperforates	Globigerinita	glutinata	III	Microperforates_Globigerinita_glutinata_III
ISU1213	1	179	Yes	R-83_1_179_4	0	0	0	0	0	0	0	0	0	0	0	0	0	0	0	0	0	0	0	0	0	0	0	0	0	0	0	0	0	0	179	4	Microperforates_Globigerinita_uvula	Microperforates	Globigerinita	uvula	-	KM193691_Microperforates_Globigerinita_uvula_NA_NA_NA;KM193181_Microperforates_Globigerinita_uvula_NA_NA_NA;KM193324_Microperforates_Globigerinita_uvula_NA_NA_NA;KM193357_Microperforates_Globigerinita_uvula_NA_NA_NA;KM193364_Microperforates_Globigerinita_uvula_NA_NA_NA;AF387173_Microperforates_Globigerinita_uvula_II_NA_NA;KM194324_Microperforates_Globigerinita_uvula_NA_NA_NA;	Microperforates	Globigerinita	uvula	II	Microperforates_Globigerinita_uvula_II
ISU1214	2	5	Yes	R-631_2_5_1	0	0	0	0	0	3	0	0	0	0	0	0	0	0	0	0	0	0	2	0	0	0	0	0	0	0	0	0	0	0	0	1	Microperforates_Candeina_nitida_NA_NA_NA	Microperforates	Candeina	nitida	NA	NAAB263435_Microperforates_Candeina_nitida_NA_NA_NA;	Microperforates	Candeina	nitida	I	Microperforates_Candeina_nitida_I
ISU1215	1	3	NO	-	0	0	0	0	0	0	0	0	0	0	0	0	0	0	0	0	0	0	0	0	0	0	0	0	0	0	0	0	3	0	0	1	Non-Spinose_Neogloboquadrina_pachyderma_IV_NA_NA	Non-Spinose	Neogloboquadrina	pachyderma	IV	NAKM193680_Non-Spinose_Neogloboquadrina_pachyderma_IV_NA_NA;	-	-	-	-	-
ISU1216	6	53	Yes	R-175_6_53_2	0	0	0	0	5	9	0	0	0	0	0	0	0	0	0	0	0	0	13	15	0	5	0	0	6	0	0	0	0	0	0	2	Microperforates_Globigerinita_glutinata	Microperforates	Globigerinita	glutinata	-	JQ799900_Microperforates_Globigerinita_glutinata_IV_NA_NA;FJ643296_Microperforates_Globigerinita_glutinata_III_NA_NA;FJ643277_Microperforates_Globigerinita_glutinata_III_NA_NA;KM193199_Microperforates_Globigerinita_glutinata_NA_NA_NA;AY453136_Microperforates_Globigerinita_glutinata_III_NA_NA;	Microperforates	Globigerinita	glutinata	III	Microperforates_Globigerinita_glutinata_III
ISU1217	1	2	NO	-	0	0	0	0	0	0	0	0	0	0	0	0	0	0	0	0	0	0	0	2	0	0	0	0	0	0	0	0	0	0	0	2	Microperforates_Globigerinita_glutinata_III_NA_NA	Microperforates	Globigerinita	glutinata	III	NAFJ643277_Microperforates_Globigerinita_glutinata_III_NA_NA;	-	-	-	-	-
ISU1218	1	2	NO	-	0	0	0	0	0	2	0	0	0	0	0	0	0	0	0	0	0	0	0	0	0	0	0	0	0	0	0	0	0	0	0	5	Microperforates_Candeina_nitida_NA_NA_NA	Microperforates	Candeina	nitida	NA	NAAB468837_Microperforates_Candeina_nitida_NA_NA_NA;KJ633212_Microperforates_Candeina_nitida_NA_NA_NA;AB468836_Microperforates_Candeina_nitida_NA_NA_NA;AB263435_Microperforates_Candeina_nitida_NA_NA_NA	-	-	-	-	-
ISU1219	2	5	Yes	R-636_2_5_4	0	0	0	0	0	0	0	0	0	0	0	0	0	0	0	0	0	0	3	2	0	0	0	0	0	0	0	0	0	0	0	4	Microperforates_Globigerinita_glutinata	Microperforates	Globigerinita	glutinata	-	JQ799900_Microperforates_Globigerinita_glutinata_IV_NA_NA;FJ643288_Microperforates_Globigerinita_glutinata_I_NA_NA;KM193539_Microperforates_Globigerinita_glutinata_NA_NA_NA;KM193303_Microperforates_Globigerinita_glutinata_NA_NA_NA;FJ643296_Microperforates_Globigerinita_glutinata_III_NA_NA;FJ643277_Microperforates_Globigerinita_glutinata_III_NA_NA;KM193199_Microperforates_Globigerinita_glutinata_N…	Microperforates	Globigerinita	glutinata	III	Microperforates_Globigerinita_glutinata_III
ISU122	6	112	Yes	R-110_6_112_1	0	0	0	2	6	35	0	0	0	0	0	0	0	0	0	0	0	0	17	28	0	24	0	0	0	0	0	0	0	0	0	1	Microperforates_Globigerinita_glutinata_III_NA_NA	Microperforates	Globigerinita	glutinata	III	NAFJ643296_Microperforates_Globigerinita_glutinata_III_NA_NA;	Microperforates	Globigerinita	glutinata	III	Microperforates_Globigerinita_glutinata_III
ISU1220	3	8	Yes	R-510_3_8_4	0	0	0	0	2	3	0	0	0	0	0	0	0	0	0	0	0	0	0	0	0	3	0	0	0	0	0	0	0	0	0	4	Microperforates_Globigerinita_glutinata	Microperforates	Globigerinita	glutinata	-	KM193484_Microperforates_Globigerinita_glutinata_NA_NA_NA;FJ643286_Microperforates_Globigerinita_glutinata_I_NA_NA	Microperforates	Globigerinita	glutinata	I	Microperforates_Globigerinita_glutinata_I
ISU1221	4	15	Yes	R-381_4_15_1	0	0	0	0	0	4	0	0	0	0	0	0	0	0	0	0	0	0	2	5	0	4	0	0	0	0	0	0	0	0	0	1	Microperforates_Globigerinita_glutinata	Microperforates	Globigerinita	glutinata	-	JQ799900_Microperforates_Globigerinita_glutinata_IV_NA_NA;FJ643296_Microperforates_Globigerinita_glutinata_III_NA_NA;KM193199_Microperforates_Globigerinita_glutinata_NA_NA_NA;AY453136_Microperforates_Globigerinita_glutinata_III_NA_NA	Microperforates	Globigerinita	glutinata	III	Microperforates_Globigerinita_glutinata_III
ISU1222	1	2	NO	-	0	0	0	0	0	0	0	0	0	0	0	0	0	0	0	0	0	0	0	2	0	0	0	0	0	0	0	0	0	0	0	2	Microperforates_Globigerinita_glutinata	Microperforates	Globigerinita	glutinata	-	JQ799900_Microperforates_Globigerinita_glutinata_IV_NA_NA;FJ643296_Microperforates_Globigerinita_glutinata_III_NA_NA;KM193199_Microperforates_Globigerinita_glutinata_NA_NA_NA;AY453136_Microperforates_Globigerinita_glutinata_III_NA_NA	-	-	-	-	-
ISU1223	7	3749	Yes	R-17_7_3749_0	12	0	0	0	761	1248	0	0	0	0	0	0	0	0	0	0	0	0	459	778	0	362	0	0	0	0	0	0	0	0	129	0	Microperforates_Globigerinita_uvula	Microperforates	Globigerinita	uvula	-	KM193070_Microperforates_Globigerinita_uvula_NA_NA_NA;FJ643298_Microperforates_Globigerinita_uvula_I_NA_NA;KM193079_Microperforates_Globigerinita_uvula_NA_NA_NA;	Microperforates	Globigerinita	uvula	I	Microperforates_Globigerinita_uvula_I
ISU1224	1	2	NO	-	0	0	0	0	0	0	0	0	0	0	0	0	0	0	0	0	0	0	0	2	0	0	0	0	0	0	0	0	0	0	0	1	Microperforates_Globigerinita_glutinata_II_NA_NA	Microperforates	Globigerinita	glutinata	II	NAAB468826_Microperforates_Globigerinita_glutinata_II_NA_NA;	-	-	-	-	-
ISU1225	1	2	NO	-	0	0	0	0	0	0	0	0	0	0	0	0	0	0	0	0	0	0	0	0	0	2	0	0	0	0	0	0	0	0	0	3	Microperforates_Globigerinita_glutinata	Microperforates	Globigerinita	glutinata	-	FJ643277_Microperforates_Globigerinita_glutinata_III_NA_NA;FJ643296_Microperforates_Globigerinita_glutinata_III_NA_NA;JQ799900_Microperforates_Globigerinita_glutinata_IV_NA_NA;KM193199_Microperforates_Globigerinita_glutinata_NA_NA_NA;AY453136_Microperforates_Globigerinita_glutinata_III_NA_NA;	-	-	-	-	-
ISU1226	5	83	Yes	R-136_5_83_1	0	0	0	0	9	30	0	0	0	0	0	0	0	0	0	0	0	0	13	15	0	16	0	0	0	0	0	0	0	0	0	1	Microperforates_Globigerinita_glutinata_III_NA_NA	Microperforates	Globigerinita	glutinata	III	NAFJ643283_Microperforates_Globigerinita_glutinata_III_NA_NA;	Microperforates	Globigerinita	glutinata	III	Microperforates_Globigerinita_glutinata_III
ISU1227	1	23	Yes	R-298_1_23_2	0	0	0	0	0	23	0	0	0	0	0	0	0	0	0	0	0	0	0	0	0	0	0	0	0	0	0	0	0	0	0	2	Monolamellar_Hastigerina_pelagica	Monolamellar	Hastigerina	pelagica	-	FJ643408_Monolamellar_Hastigerina_pelagica_II_a_NA;KM194103_Monolamellar_Hastigerina_pelagica_NA_NA_NA;FJ643367_Monolamellar_Hastigerina_pelagica_II_a_NA;FJ643402_Monolamellar_Hastigerina_pelagica_NA_NA_NA	Monolamellar	Hastigerina	pelagica	IIa	Monolamellar_Hastigerina_pelagica_IIa
ISU1228	1	2	NO	-	0	0	0	0	0	2	0	0	0	0	0	0	0	0	0	0	0	0	0	0	0	0	0	0	0	0	0	0	0	0	0	5	Microperforates_Globigerinita_uvula	Microperforates	Globigerinita	uvula	-	FJ643298_Microperforates_Globigerinita_uvula_I_NA_NA;KM193079_Microperforates_Globigerinita_uvula_NA_NA_NA;KM193070_Microperforates_Globigerinita_uvula_NA_NA_NA;	-	-	-	-	-
ISU1229	4	426	Yes	R-42_4_426_1	0	0	0	0	0	21	0	0	0	0	0	0	0	0	0	0	0	0	7	8	0	390	0	0	0	0	0	0	0	0	0	1	Microperforates_Globigerinita_glutinata_III_NA_NA	Microperforates	Globigerinita	glutinata	III	NAFJ643283_Microperforates_Globigerinita_glutinata_III_NA_NA;	Microperforates	Globigerinita	glutinata	III	Microperforates_Globigerinita_glutinata_III
ISU123	1	2	NO	-	0	0	0	0	0	0	0	0	0	0	0	0	0	0	0	0	0	0	2	0	0	0	0	0	0	0	0	0	0	0	0	4	Microperforates_Globigerinita_glutinata	Microperforates	Globigerinita	glutinata	-	KM193484_Microperforates_Globigerinita_glutinata_NA_NA_NA;FJ643286_Microperforates_Globigerinita_glutinata_I_NA_NA	-	-	-	-	-
ISU1230	1	2	NO	-	0	0	0	0	0	0	0	0	0	0	0	0	0	0	0	0	0	0	0	2	0	0	0	0	0	0	0	0	0	0	0	1	Microperforates_Globigerinita_glutinata	Microperforates	Globigerinita	glutinata	-	FJ643418_Microperforates_Globigerinita_glutinata_NA_NA_NA;AB468827_Microperforates_Globigerinita_glutinata_II_NA_NA;AB468829_Microperforates_Globigerinita_glutinata_II_NA_NA;	-	-	-	-	-
ISU1231	1	4	NO	-	0	0	0	0	0	0	0	0	0	0	0	0	4	0	0	0	0	0	0	0	0	0	0	0	0	0	0	0	0	0	0	6	Non-Spinose_Globoquadrina_conglomerata_NA_NA_NA	Non-Spinose	Globoquadrina	conglomerata	NA	NAKM193124_Non-Spinose_Globoquadrina_conglomerata_NA_NA_NA;KM193106_Non-Spinose_Globoquadrina_conglomerata_NA_NA_NA;KM193115_Non-Spinose_Globoquadrina_conglomerata_NA_NA_NA;KM193112_Non-Spinose_Globoquadrina_conglomerata_NA_NA_NA;KM193104_Non-Spinose_Globoquadrina_conglomerata_NA_NA_NA;KM193119_Non-Spinose_Globoquadrina_conglomerata_NA_NA_NA;KM193114_Non-Spinose_Globoquadrina_conglomerata_NA_NA_N…	-	-	-	-	-
ISU1232	1	2	NO	-	0	0	0	0	0	0	0	0	0	0	0	0	0	0	0	0	0	0	0	0	0	2	0	0	0	0	0	0	0	0	0	6	Microperforates_Globigerinita_glutinata	Microperforates	Globigerinita	glutinata	-	FJ643277_Microperforates_Globigerinita_glutinata_III_NA_NA;FJ643296_Microperforates_Globigerinita_glutinata_III_NA_NA;JQ799900_Microperforates_Globigerinita_glutinata_IV_NA_NA;KM193539_Microperforates_Globigerinita_glutinata_NA_NA_NA;KM193303_Microperforates_Globigerinita_glutinata_NA_NA_NA;KM193199_Microperforates_Globigerinita_glutinata_NA_NA_NA;AY453136_Microperforates_Globigerinita_glutinata_…	-	-	-	-	-
ISU1233	1	2	NO	-	0	0	0	0	0	2	0	0	0	0	0	0	0	0	0	0	0	0	0	0	0	0	0	0	0	0	0	0	0	0	0	1	Spinose_Globigerinella	Spinose	Globigerinella	siphonifera	-	AF102228_Spinose_Globigerinella_siphonifera_II_b_NA;KF769827_Spinose_Globigerinella_calida_II_b_NA;FJ643376_Spinose_Globigerinella_siphonifera_NA_NA_NA;	-	-	-	-	-
ISU1234	4	16	Yes	R-364_4_16_1	0	0	0	0	0	0	0	0	0	3	9	2	0	0	0	0	0	0	0	0	0	0	0	0	0	2	0	0	0	0	0	1	Non-Spinose_Neogloboquadrina_pachyderma_I_NA_NA	Non-Spinose	Neogloboquadrina	pachyderma	I	NAAY305329_Non-Spinose_Neogloboquadrina_pachyderma_I_NA_NA;	Non-Spinose	Neogloboquadrina	pachyderma	I	Non-Spinose_Neogloboquadrina_pachyderma_I
ISU1235	4	273	Yes	R-58_4_273_1	0	0	0	0	0	2	0	0	0	0	0	0	0	0	0	0	0	0	68	120	0	83	0	0	0	0	0	0	0	0	0	1	Microperforates_Globigerinita_glutinata_III_NA_NA	Microperforates	Globigerinita	glutinata	III	NAFJ643283_Microperforates_Globigerinita_glutinata_III_NA_NA;	Microperforates	Globigerinita	glutinata	III	Microperforates_Globigerinita_glutinata_III
ISU1236	2	12	Yes	R-416_2_12_1	0	0	0	0	0	0	0	0	0	2	10	0	0	0	0	0	0	0	0	0	0	0	0	0	0	0	0	0	0	0	0	1	Non-Spinose_Neogloboquadrina_pachyderma_I_NA_NA	Non-Spinose	Neogloboquadrina	pachyderma	I	NAAY305329_Non-Spinose_Neogloboquadrina_pachyderma_I_NA_NA;	Non-Spinose	Neogloboquadrina	pachyderma	I	Non-Spinose_Neogloboquadrina_pachyderma_I
ISU1237	3	6	Yes	R-593_3_6_4	0	0	0	0	0	0	0	0	0	0	0	0	0	0	0	0	0	0	2	2	0	2	0	0	0	0	0	0	0	0	0	4	Microperforates_Globigerinita_glutinata	Microperforates	Globigerinita	glutinata	-	JQ799900_Microperforates_Globigerinita_glutinata_IV_NA_NA;FJ643288_Microperforates_Globigerinita_glutinata_I_NA_NA;KM193539_Microperforates_Globigerinita_glutinata_NA_NA_NA;KM193303_Microperforates_Globigerinita_glutinata_NA_NA_NA;FJ643296_Microperforates_Globigerinita_glutinata_III_NA_NA;FJ643277_Microperforates_Globigerinita_glutinata_III_NA_NA;KM193199_Microperforates_Globigerinita_glutinata_N…	Microperforates	Globigerinita	glutinata	III	Microperforates_Globigerinita_glutinata_III
ISU1238	1	5	NO	-	0	0	0	0	0	5	0	0	0	0	0	0	0	0	0	0	0	0	0	0	0	0	0	0	0	0	0	0	0	0	0	7	Microperforates_Globigerinita_uvula	Microperforates	Globigerinita	uvula	-	FJ643298_Microperforates_Globigerinita_uvula_I_NA_NA;KM193079_Microperforates_Globigerinita_uvula_NA_NA_NA;KM193070_Microperforates_Globigerinita_uvula_NA_NA_NA;	-	-	-	-	-
ISU1239	1	2	NO	-	2	0	0	0	0	0	0	0	0	0	0	0	0	0	0	0	0	0	0	0	0	0	0	0	0	0	0	0	0	0	0	1	Microperforates_Globigerinita_uvula	Microperforates	Globigerinita	uvula	-	KM193181_Microperforates_Globigerinita_uvula_NA_NA_NA;KM193691_Microperforates_Globigerinita_uvula_NA_NA_NA;KM193364_Microperforates_Globigerinita_uvula_NA_NA_NA;AF387173_Microperforates_Globigerinita_uvula_II_NA_NA;KM194324_Microperforates_Globigerinita_uvula_NA_NA_NA;	-	-	-	-	-
ISU124	2	74	Yes	R-145_2_74_0	0	0	0	0	0	22	0	0	0	0	0	0	0	0	0	0	0	0	0	0	0	52	0	0	0	0	0	0	0	0	0	0	Spinose_Globigerina_falconensis_NA_NA_NA	Spinose	Globigerina	falconensis	NA	NAKM193431_Spinose_Globigerina_falconensis_NA_NA_NA;	Spinose	Globigerina	falconensis	I	Spinose_Globigerina_falconensis_I
ISU1240	6	4660	Yes	R-15_6_4660_2	0	0	0	102	394	889	0	0	0	0	0	0	0	0	0	0	0	0	199	744	0	2332	0	0	0	0	0	0	0	0	0	2	Microperforates_Globigerinita_glutinata_III_NA_NA	Microperforates	Globigerinita	glutinata	III	NAFJ643283_Microperforates_Globigerinita_glutinata_III_NA_NA;	Microperforates	Globigerinita	glutinata	I	Microperforates_Globigerinita_glutinata_I
ISU1241	4	49	Yes	R-190_4_49_1	0	0	0	0	0	24	0	0	0	0	0	0	0	0	0	0	0	0	7	10	0	8	0	0	0	0	0	0	0	0	0	1	Microperforates_Globigerinita_glutinata	Microperforates	Globigerinita	glutinata	-	AY453136_Microperforates_Globigerinita_glutinata_III_NA_NA;KM193199_Microperforates_Globigerinita_glutinata_NA_NA_NA;JQ799900_Microperforates_Globigerinita_glutinata_IV_NA_NA;	Microperforates	Globigerinita	glutinata	III	Microperforates_Globigerinita_glutinata_III
ISU1242	1	6	NO	-	0	0	0	0	0	0	0	0	0	0	0	0	0	0	0	0	0	0	0	0	0	0	0	0	0	6	0	0	0	0	0	1	Non-Spinose_Neogloboquadrina_pachyderma_I_NA_NA	Non-Spinose	Neogloboquadrina	pachyderma	I	NAAY305329_Non-Spinose_Neogloboquadrina_pachyderma_I_NA_NA;	-	-	-	-	-
ISU1243	2	5	Yes	R-637_2_5_1	0	0	0	0	0	0	0	0	0	0	0	0	0	0	0	0	0	0	0	2	0	3	0	0	0	0	0	0	0	0	0	1	Microperforates_Globigerinita_glutinata_III_NA_NA	Microperforates	Globigerinita	glutinata	III	NAFJ643277_Microperforates_Globigerinita_glutinata_III_NA_NA;	Microperforates	Globigerinita	glutinata	III	Microperforates_Globigerinita_glutinata_III
ISU1244	1	2	NO	-	0	0	0	0	0	2	0	0	0	0	0	0	0	0	0	0	0	0	0	0	0	0	0	0	0	0	0	0	0	0	0	2	Microperforates_Globigerinita_glutinata	Microperforates	Globigerinita	glutinata	-	JQ799900_Microperforates_Globigerinita_glutinata_IV_NA_NA;FJ643296_Microperforates_Globigerinita_glutinata_III_NA_NA;KM193199_Microperforates_Globigerinita_glutinata_NA_NA_NA;AY453136_Microperforates_Globigerinita_glutinata_III_NA_NA	-	-	-	-	-
ISU1245	2	9	Yes	R-488_2_9_3	0	0	0	0	0	0	0	0	0	0	0	0	0	0	0	0	0	0	0	2	0	7	0	0	0	0	0	0	0	0	0	3	Microperforates_Globigerinita_glutinata	Microperforates	Globigerinita	glutinata	-	KM193151_Microperforates_Globigerinita_glutinata_NA_NA_NA;KM193497_Microperforates_Globigerinita_glutinata_NA_NA_NA;FJ643294_Microperforates_Globigerinita_glutinata_I_NA_NA;	Microperforates	Globigerinita	glutinata	I	Microperforates_Globigerinita_glutinata_I
ISU1246	4	10	Yes	R-461_4_10_2	0	0	0	2	2	0	0	0	0	0	0	0	0	0	0	0	0	0	0	4	0	2	0	0	0	0	0	0	0	0	0	2	Microperforates_Candeina_nitida_NA_NA_NA	Microperforates	Candeina	nitida	NA	NAKJ633212_Microperforates_Candeina_nitida_NA_NA_NA;	Microperforates	Candeina	nitida	I	Microperforates_Candeina_nitida_I
ISU1247	1	2	NO	-	0	0	0	0	0	0	0	0	0	0	0	0	0	0	0	0	0	0	0	2	0	0	0	0	0	0	0	0	0	0	0	4	Microperforates_Candeina_nitida_NA_NA_NA	Microperforates	Candeina	nitida	NA	NAAB468837_Microperforates_Candeina_nitida_NA_NA_NA;AB468836_Microperforates_Candeina_nitida_NA_NA_NA;KJ633212_Microperforates_Candeina_nitida_NA_NA_NA;AB263435_Microperforates_Candeina_nitida_NA_NA_NA	-	-	-	-	-
ISU1248	1	2	NO	-	0	0	0	0	0	0	0	0	0	0	0	0	0	0	0	0	0	0	0	0	0	0	0	0	0	2	0	0	0	0	0	1	Non-Spinose_Neogloboquadrina_pachyderma_I_NA_NA	Non-Spinose	Neogloboquadrina	pachyderma	I	NAAY305329_Non-Spinose_Neogloboquadrina_pachyderma_I_NA_NA;	-	-	-	-	-
ISU1249	1	3	NO	-	0	0	0	0	0	3	0	0	0	0	0	0	0	0	0	0	0	0	0	0	0	0	0	0	0	0	0	0	0	0	0	2	Microperforates_Globigerinita_glutinata	Microperforates	Globigerinita	glutinata	-	FJ643286_Microperforates_Globigerinita_glutinata_I_NA_NA;KM193484_Microperforates_Globigerinita_glutinata_NA_NA_NA	-	-	-	-	-
ISU125	1	12	Yes	R-415_1_12_1	0	0	0	0	0	0	0	0	0	0	0	0	0	0	0	0	0	0	0	0	0	0	0	0	0	0	0	0	12	0	0	1	Non-Spinose_Neogloboquadrina_pachyderma_IV_NA_NA	Non-Spinose	Neogloboquadrina	pachyderma	IV	NAKM193680_Non-Spinose_Neogloboquadrina_pachyderma_IV_NA_NA;	Non-Spinose	Neogloboquadrina	pachyderma	IV	Non-Spinose_Neogloboquadrina_pachyderma_IV
ISU1250	2	9	Yes	R-474_2_9_1	7	0	0	0	0	0	0	0	0	0	0	0	0	0	0	0	2	0	0	0	0	0	0	0	0	0	0	0	0	0	0	1	Microperforates_Globigerinita_uvula	Microperforates	Globigerinita	uvula	-	KM193181_Microperforates_Globigerinita_uvula_NA_NA_NA;KM193691_Microperforates_Globigerinita_uvula_NA_NA_NA;KM193364_Microperforates_Globigerinita_uvula_NA_NA_NA;AF387173_Microperforates_Globigerinita_uvula_II_NA_NA;KM194324_Microperforates_Globigerinita_uvula_NA_NA_NA;	Microperforates	Globigerinita	uvula	II	Microperforates_Globigerinita_uvula_II
ISU1251	1	2	NO	-	0	0	0	0	0	0	0	0	0	0	0	0	0	0	0	0	0	0	0	2	0	0	0	0	0	0	0	0	0	0	0	1	Microperforates_Globigerinita_glutinata_III_NA_NA	Microperforates	Globigerinita	glutinata	III	NAFJ643277_Microperforates_Globigerinita_glutinata_III_NA_NA;	-	-	-	-	-
ISU1252	3	7	Yes	R-532_3_7_1	0	0	0	0	3	2	0	0	0	0	0	0	0	0	0	0	0	0	2	0	0	0	0	0	0	0	0	0	0	0	0	1	Microperforates_Globigerinita_uvula	Microperforates	Globigerinita	uvula	-	FJ643298_Microperforates_Globigerinita_uvula_I_NA_NA;KM193070_Microperforates_Globigerinita_uvula_NA_NA_NA;KM193079_Microperforates_Globigerinita_uvula_NA_NA_NA;	Microperforates	Globigerinita	uvula	I	Microperforates_Globigerinita_uvula_I
ISU1253	6	323	Yes	R-51_6_323_1	0	0	0	5	29	120	0	0	0	0	0	0	0	0	0	0	0	0	34	77	0	58	0	0	0	0	0	0	0	0	0	1	Microperforates_Globigerinita_glutinata_III_NA_NA	Microperforates	Globigerinita	glutinata	III	NAFJ643283_Microperforates_Globigerinita_glutinata_III_NA_NA;	Microperforates	Globigerinita	glutinata	III	Microperforates_Globigerinita_glutinata_III
ISU1254	1	2	NO	-	0	0	0	0	2	0	0	0	0	0	0	0	0	0	0	0	0	0	0	0	0	0	0	0	0	0	0	0	0	0	0	2	Microperforates_Globigerinita_uvula	Microperforates	Globigerinita	uvula	-	FJ643298_Microperforates_Globigerinita_uvula_I_NA_NA;KM193070_Microperforates_Globigerinita_uvula_NA_NA_NA;KM193079_Microperforates_Globigerinita_uvula_NA_NA_NA;	-	-	-	-	-
ISU1255	1	4	NO	-	0	0	0	0	0	0	0	0	0	0	0	0	0	0	0	0	0	0	0	0	0	0	0	0	0	4	0	0	0	0	0	2	Non-Spinose_Neogloboquadrina_pachyderma_I_NA_NA	Non-Spinose	Neogloboquadrina	pachyderma	I	NAAY305329_Non-Spinose_Neogloboquadrina_pachyderma_I_NA_NA;	-	-	-	-	-
ISU1256	15	187603	Yes	R-1_15_187603_0	0	0	0	1021	11312	61926	17	8	28	4	10	2	0	0	0	0	0	0	32103	37571	0	43527	15	35	24	0	0	0	0	0	0	0	Microperforates_Globigerinita_glutinata_III_NA_NA	Microperforates	Globigerinita	glutinata	III	NAFJ643283_Microperforates_Globigerinita_glutinata_III_NA_NA;	Microperforates	Globigerinita	glutinata	III	Microperforates_Globigerinita_glutinata_III
ISU1257	5	65	Yes	R-162_5_65_1	0	0	0	0	4	21	0	0	0	0	0	0	0	0	0	0	0	0	15	14	0	11	0	0	0	0	0	0	0	0	0	1	Microperforates_Globigerinita_glutinata_III_NA_NA	Microperforates	Globigerinita	glutinata	III	NAFJ643283_Microperforates_Globigerinita_glutinata_III_NA_NA;	Microperforates	Globigerinita	glutinata	III	Microperforates_Globigerinita_glutinata_III
ISU1258	2	5	Yes	R-619_2_5_1	0	0	0	0	2	3	0	0	0	0	0	0	0	0	0	0	0	0	0	0	0	0	0	0	0	0	0	0	0	0	0	1	Microperforates_Globigerinita_uvula	Microperforates	Globigerinita	uvula	-	FJ643298_Microperforates_Globigerinita_uvula_I_NA_NA;KM193070_Microperforates_Globigerinita_uvula_NA_NA_NA;KM193079_Microperforates_Globigerinita_uvula_NA_NA_NA;	Microperforates	Globigerinita	uvula	I	Microperforates_Globigerinita_uvula_I
ISU1259	4	11	Yes	R-445_4_11_1	0	0	0	0	0	4	0	0	0	0	0	0	0	0	0	0	0	0	2	3	0	2	0	0	0	0	0	0	0	0	0	1	Microperforates_Globigerinita_glutinata_III_NA_NA	Microperforates	Globigerinita	glutinata	III	NAFJ643283_Microperforates_Globigerinita_glutinata_III_NA_NA;	Microperforates	Globigerinita	glutinata	III	Microperforates_Globigerinita_glutinata_III
ISU126	1	2	NO	-	0	0	0	0	2	0	0	0	0	0	0	0	0	0	0	0	0	0	0	0	0	0	0	0	0	0	0	0	0	0	0	6	Microperforates_Globigerinita_glutinata	Microperforates	Globigerinita	glutinata	-	JQ799900_Microperforates_Globigerinita_glutinata_IV_NA_NA;FJ643288_Microperforates_Globigerinita_glutinata_I_NA_NA;KM193303_Microperforates_Globigerinita_glutinata_NA_NA_NA;FJ643296_Microperforates_Globigerinita_glutinata_III_NA_NA;FJ643277_Microperforates_Globigerinita_glutinata_III_NA_NA;KM193539_Microperforates_Globigerinita_glutinata_NA_NA_NA;KM193199_Microperforates_Globigerinita_glutinata_N…	-	-	-	-	-
ISU1260	5	48	Yes	R-194_5_48_1	0	0	0	0	3	22	0	0	0	0	0	0	0	0	0	0	0	0	12	5	0	6	0	0	0	0	0	0	0	0	0	1	Microperforates_Globigerinita_glutinata_III_NA_NA	Microperforates	Globigerinita	glutinata	III	NAFJ643283_Microperforates_Globigerinita_glutinata_III_NA_NA;	Microperforates	Globigerinita	glutinata	III	Microperforates_Globigerinita_glutinata_III
ISU1261	3	10	Yes	R-469_3_10_1	0	0	0	0	0	5	0	0	0	0	0	0	0	0	0	0	0	0	2	3	0	0	0	0	0	0	0	0	0	0	0	1	Microperforates_Globigerinita_glutinata_III_NA_NA	Microperforates	Globigerinita	glutinata	III	NAFJ643283_Microperforates_Globigerinita_glutinata_III_NA_NA;	Microperforates	Globigerinita	glutinata	III	Microperforates_Globigerinita_glutinata_III
ISU1262	1	2	NO	-	0	0	0	0	0	0	0	0	0	0	0	0	0	0	0	0	0	0	0	0	0	2	0	0	0	0	0	0	0	0	0	4	Microperforates_Globigerinita_glutinata	Microperforates	Globigerinita	glutinata	-	FJ643286_Microperforates_Globigerinita_glutinata_I_NA_NA;KM193484_Microperforates_Globigerinita_glutinata_NA_NA_NA	-	-	-	-	-
ISU1263	1	5	NO	-	0	0	0	0	0	0	0	0	0	0	0	0	0	0	0	0	0	0	0	0	0	5	0	0	0	0	0	0	0	0	0	3	Microperforates_Globigerinita_glutinata	Microperforates	Globigerinita	glutinata	-	KM193497_Microperforates_Globigerinita_glutinata_NA_NA_NA;FJ643294_Microperforates_Globigerinita_glutinata_I_NA_NA;KM193151_Microperforates_Globigerinita_glutinata_NA_NA_NA;	-	-	-	-	-
ISU1264	1	3	NO	-	0	0	0	0	0	0	0	0	0	0	0	0	0	0	0	0	0	0	3	0	0	0	0	0	0	0	0	0	0	0	0	6	Microperforates_Globigerinita_glutinata	Microperforates	Globigerinita	glutinata	-	JQ799900_Microperforates_Globigerinita_glutinata_IV_NA_NA;FJ643288_Microperforates_Globigerinita_glutinata_I_NA_NA;KM193539_Microperforates_Globigerinita_glutinata_NA_NA_NA;KM193303_Microperforates_Globigerinita_glutinata_NA_NA_NA;FJ643296_Microperforates_Globigerinita_glutinata_III_NA_NA;FJ643277_Microperforates_Globigerinita_glutinata_III_NA_NA;KM193199_Microperforates_Globigerinita_glutinata_N…	-	-	-	-	-
ISU1265	1	2	NO	-	0	0	0	0	0	0	0	0	0	0	0	0	0	0	0	0	0	0	0	0	0	2	0	0	0	0	0	0	0	0	0	1	Microperforates_Globigerinita_glutinata_NA_NA_NA	Microperforates	Globigerinita	glutinata	NA	NAKM193539_Microperforates_Globigerinita_glutinata_NA_NA_NA;	-	-	-	-	-
ISU1266	3	9	Yes	R-481_3_9_1	0	0	0	0	0	0	0	0	0	3	3	0	0	0	0	0	0	0	0	0	0	0	0	0	0	3	0	0	0	0	0	1	Non-Spinose_Neogloboquadrina_pachyderma_I_NA_NA	Non-Spinose	Neogloboquadrina	pachyderma	I	NAAY305329_Non-Spinose_Neogloboquadrina_pachyderma_I_NA_NA;	Non-Spinose	Neogloboquadrina	pachyderma	I	Non-Spinose_Neogloboquadrina_pachyderma_I
ISU1267	2	6	Yes	R-604_2_6_4	0	0	0	0	0	2	0	0	0	0	0	0	0	0	0	0	0	0	0	0	0	4	0	0	0	0	0	0	0	0	0	4	Microperforates_Globigerinita_glutinata	Microperforates	Globigerinita	glutinata	-	FJ643286_Microperforates_Globigerinita_glutinata_I_NA_NA;KM193484_Microperforates_Globigerinita_glutinata_NA_NA_NA	Microperforates	Globigerinita	glutinata	I	Microperforates_Globigerinita_glutinata_I
ISU1268	2	9	Yes	R-472_2_9_6	0	0	0	0	3	0	0	0	0	0	0	0	0	0	0	0	0	0	0	6	0	0	0	0	0	0	0	0	0	0	0	6	Microperforates_Globigerinita_uvula	Microperforates	Globigerinita	uvula	-	FJ643298_Microperforates_Globigerinita_uvula_I_NA_NA;KM193160_Microperforates_Globigerinita_uvula_NA_NA_NA;KM193079_Microperforates_Globigerinita_uvula_NA_NA_NA;KM193075_Microperforates_Globigerinita_uvula_NA_NA_NA;KM193070_Microperforates_Globigerinita_uvula_NA_NA_NA;	Microperforates	Globigerinita	uvula	I	Microperforates_Globigerinita_uvula_I
ISU1269	5	111	Yes	R-113_5_111_1	0	0	0	0	4	70	0	0	0	0	0	0	0	0	0	0	0	0	14	9	0	14	0	0	0	0	0	0	0	0	0	1	Microperforates_Globigerinita_glutinata_III_NA_NA	Microperforates	Globigerinita	glutinata	III	NAFJ643283_Microperforates_Globigerinita_glutinata_III_NA_NA;	Microperforates	Globigerinita	glutinata	III	Microperforates_Globigerinita_glutinata_III
ISU127	3	10	Yes	R-470_3_10_1	0	0	0	0	0	3	0	0	0	0	0	0	0	0	0	0	0	0	0	3	0	4	0	0	0	0	0	0	0	0	0	1	Microperforates_Globigerinita_glutinata_III_NA_NA	Microperforates	Globigerinita	glutinata	III	NAFJ643283_Microperforates_Globigerinita_glutinata_III_NA_NA;	Microperforates	Globigerinita	glutinata	III	Microperforates_Globigerinita_glutinata_III
ISU1270	5	89	Yes	R-130_5_89_1	0	0	0	0	4	26	0	0	0	0	0	0	0	0	0	0	0	0	16	20	0	23	0	0	0	0	0	0	0	0	0	1	Microperforates_Globigerinita_glutinata_III_NA_NA	Microperforates	Globigerinita	glutinata	III	NAFJ643283_Microperforates_Globigerinita_glutinata_III_NA_NA;	Microperforates	Globigerinita	glutinata	III	Microperforates_Globigerinita_glutinata_III
ISU1271	2	5	Yes	R-645_2_5_3	0	0	0	0	0	3	0	0	0	0	0	0	0	0	0	0	0	0	0	0	0	2	0	0	0	0	0	0	0	0	0	3	Microperforates_Globigerinita_glutinata	Microperforates	Globigerinita	glutinata	-	FJ643294_Microperforates_Globigerinita_glutinata_I_NA_NA;KM193497_Microperforates_Globigerinita_glutinata_NA_NA_NA;FJ643283_Microperforates_Globigerinita_glutinata_III_NA_NA;KM193151_Microperforates_Globigerinita_glutinata_NA_NA_NA	Microperforates	Globigerinita	glutinata	I	Microperforates_Globigerinita_glutinata_I
ISU1272	5	81	Yes	R-140_5_81_1	0	0	0	0	5	34	0	0	0	0	0	0	0	0	0	0	0	0	11	16	0	15	0	0	0	0	0	0	0	0	0	1	Microperforates_Globigerinita_glutinata_III_NA_NA	Microperforates	Globigerinita	glutinata	III	NAFJ643283_Microperforates_Globigerinita_glutinata_III_NA_NA;	Microperforates	Globigerinita	glutinata	III	Microperforates_Globigerinita_glutinata_III
ISU1273	5	30	Yes	R-261_5_30_1	0	0	0	0	3	6	0	0	0	0	0	0	0	0	0	0	0	0	2	8	0	11	0	0	0	0	0	0	0	0	0	1	Microperforates_Globigerinita_glutinata	Microperforates	Globigerinita	glutinata	-	FJ643296_Microperforates_Globigerinita_glutinata_III_NA_NA;KM193199_Microperforates_Globigerinita_glutinata_NA_NA_NA;FJ643277_Microperforates_Globigerinita_glutinata_III_NA_NA;AY453136_Microperforates_Globigerinita_glutinata_III_NA_NA;JQ799900_Microperforates_Globigerinita_glutinata_IV_NA_NA;	Microperforates	Globigerinita	glutinata	III	Microperforates_Globigerinita_glutinata_III
ISU1274	1	2	NO	-	0	0	0	0	0	2	0	0	0	0	0	0	0	0	0	0	0	0	0	0	0	0	0	0	0	0	0	0	0	0	0	2	Non-Spiral_Galietelia_vivans_NA_NA_NA	Non-Spiral	Galietelia	vivans	NA	NAAB364519_Non-Spiral_Galietelia_vivans_NA_NA_NA;AB364517_Non-Spiral_Galietelia_vivans_NA_NA_NA;AB364518_Non-Spiral_Galietelia_vivans_NA_NA_NA;	-	-	-	-	-
ISU1275	3	7	Yes	R-534_3_7_5	0	0	0	0	0	3	0	0	0	0	0	0	0	0	0	0	0	0	2	0	0	2	0	0	0	0	0	0	0	0	0	5	Microperforates_Globigerinita_glutinata	Microperforates	Globigerinita	glutinata	-	FJ643286_Microperforates_Globigerinita_glutinata_I_NA_NA;KM193484_Microperforates_Globigerinita_glutinata_NA_NA_NA	Microperforates	Globigerinita	glutinata	I	Microperforates_Globigerinita_glutinata_I
ISU1276	1	3	NO	-	0	0	0	0	0	0	0	0	0	0	0	0	0	0	0	0	0	0	0	0	0	0	0	0	0	0	0	0	3	0	0	1	Non-Spinose_Neogloboquadrina_pachyderma_IV_NA_NA	Non-Spinose	Neogloboquadrina	pachyderma	IV	NAKM193550_Non-Spinose_Neogloboquadrina_pachyderma_IV_NA_NA;KM193530_Non-Spinose_Neogloboquadrina_pachyderma_IV_NA_NA;KM193284_Non-Spinose_Neogloboquadrina_pachyderma_IV_NA_NA;KM193861_Non-Spinose_Neogloboquadrina_pachyderma_IV_NA_NA;KM193614_Non-Spinose_Neogloboquadrina_pachyderma_IV_NA_NA;KM193889_Non-Spinose_Neogloboquadrina_pachyderma_IV_NA_NA;KM193556_Non-Spinose_Neogloboquadrina_pachyderma_…	-	-	-	-	-
ISU1277	1	2	NO	-	0	0	0	0	0	0	0	0	0	0	0	0	0	0	0	0	0	0	2	0	0	0	0	0	0	0	0	0	0	0	0	2	Microperforates_Globigerinita_glutinata_III_NA_NA	Microperforates	Globigerinita	glutinata	III	NAFJ643283_Microperforates_Globigerinita_glutinata_III_NA_NA;	-	-	-	-	-
ISU1278	1	2	NO	-	0	0	0	0	0	0	0	0	0	0	0	0	0	0	0	0	0	0	2	0	0	0	0	0	0	0	0	0	0	0	0	1	Microperforates_Globigerinita_glutinata_III_NA_NA	Microperforates	Globigerinita	glutinata	III	NAFJ643296_Microperforates_Globigerinita_glutinata_III_NA_NA;	-	-	-	-	-
ISU1279	1	2	NO	-	0	0	0	0	0	2	0	0	0	0	0	0	0	0	0	0	0	0	0	0	0	0	0	0	0	0	0	0	0	0	0	5	Microperforates_Globigerinita_uvula	Microperforates	Globigerinita	uvula	-	FJ643298_Microperforates_Globigerinita_uvula_I_NA_NA;KM193079_Microperforates_Globigerinita_uvula_NA_NA_NA;KM193070_Microperforates_Globigerinita_uvula_NA_NA_NA;	-	-	-	-	-
ISU128	5	82	Yes	R-139_5_82_1	0	0	0	0	2	38	0	0	0	0	0	0	0	0	0	0	0	0	11	8	0	23	0	0	0	0	0	0	0	0	0	1	Microperforates_Globigerinita_glutinata_III_NA_NA	Microperforates	Globigerinita	glutinata	III	NAFJ643283_Microperforates_Globigerinita_glutinata_III_NA_NA;	Microperforates	Globigerinita	glutinata	III	Microperforates_Globigerinita_glutinata_III
ISU1280	1	41	Yes	R-221_1_41_3	0	0	0	0	0	41	0	0	0	0	0	0	0	0	0	0	0	0	0	0	0	0	0	0	0	0	0	0	0	0	0	3	Microperforates_Globigerinita_glutinata	Microperforates	Globigerinita	glutinata	-	JQ799900_Microperforates_Globigerinita_glutinata_IV_NA_NA;FJ643288_Microperforates_Globigerinita_glutinata_I_NA_NA;KM193303_Microperforates_Globigerinita_glutinata_NA_NA_NA;FJ643296_Microperforates_Globigerinita_glutinata_III_NA_NA;FJ643277_Microperforates_Globigerinita_glutinata_III_NA_NA;KM193539_Microperforates_Globigerinita_glutinata_NA_NA_NA;KM193199_Microperforates_Globigerinita_glutinata_N…	Microperforates	Globigerinita	glutinata	III	Microperforates_Globigerinita_glutinata_III
ISU1281	1	4	NO	-	0	0	0	0	0	4	0	0	0	0	0	0	0	0	0	0	0	0	0	0	0	0	0	0	0	0	0	0	0	0	0	1	Non-Spiral_Galietelia_vivans_NA_NA_NA	Non-Spiral	Galietelia	vivans	NA	NAAB364517_Non-Spiral_Galietelia_vivans_NA_NA_NA;AB364518_Non-Spiral_Galietelia_vivans_NA_NA_NA	-	-	-	-	-
ISU1282	1	3	NO	-	0	0	0	0	0	0	0	0	0	0	0	3	0	0	0	0	0	0	0	0	0	0	0	0	0	0	0	0	0	0	0	1	Non-Spinose_Neogloboquadrina_pachyderma_I_NA_NA	Non-Spinose	Neogloboquadrina	pachyderma	I	NAAY305329_Non-Spinose_Neogloboquadrina_pachyderma_I_NA_NA;	-	-	-	-	-
ISU1283	1	3	NO	-	0	0	0	0	0	0	0	0	0	0	0	0	0	0	0	0	0	0	0	0	0	3	0	0	0	0	0	0	0	0	0	3	Microperforates_Globigerinita_glutinata	Microperforates	Globigerinita	glutinata	-	FJ643286_Microperforates_Globigerinita_glutinata_I_NA_NA;KM193484_Microperforates_Globigerinita_glutinata_NA_NA_NA	-	-	-	-	-
ISU1284	1	2	NO	-	2	0	0	0	0	0	0	0	0	0	0	0	0	0	0	0	0	0	0	0	0	0	0	0	0	0	0	0	0	0	0	1	Microperforates_Globigerinita_uvula	Microperforates	Globigerinita	uvula	-	KM193181_Microperforates_Globigerinita_uvula_NA_NA_NA;KM193691_Microperforates_Globigerinita_uvula_NA_NA_NA;KM193364_Microperforates_Globigerinita_uvula_NA_NA_NA;AF387173_Microperforates_Globigerinita_uvula_II_NA_NA;KM194324_Microperforates_Globigerinita_uvula_NA_NA_NA;	-	-	-	-	-
ISU1285	1	6	NO	-	0	0	0	0	0	6	0	0	0	0	0	0	0	0	0	0	0	0	0	0	0	0	0	0	0	0	0	0	0	0	0	2	Microperforates_Globigerinita_glutinata	Microperforates	Globigerinita	glutinata	-	FJ643294_Microperforates_Globigerinita_glutinata_I_NA_NA;KM193497_Microperforates_Globigerinita_glutinata_NA_NA_NA;FJ643283_Microperforates_Globigerinita_glutinata_III_NA_NA;KM193151_Microperforates_Globigerinita_glutinata_NA_NA_NA	-	-	-	-	-
ISU1286	1	2	NO	-	0	0	0	0	0	2	0	0	0	0	0	0	0	0	0	0	0	0	0	0	0	0	0	0	0	0	0	0	0	0	0	2	Microperforates_Globigerinita_glutinata_III_NA_NA	Microperforates	Globigerinita	glutinata	III	NAFJ643277_Microperforates_Globigerinita_glutinata_III_NA_NA;	-	-	-	-	-
ISU1287	1	6	NO	-	0	0	0	0	0	0	0	0	0	0	0	0	6	0	0	0	0	0	0	0	0	0	0	0	0	0	0	0	0	0	0	1	Spinose_Globigerina_bulloides_II_c_NA	Spinose	Globigerina	bulloides	II	cAF250111_Spinose_Globigerina_bulloides_II_c_NA;	-	-	-	-	-
ISU1288	2	4	Yes	R-675_2_4_7	0	0	0	0	2	0	0	0	0	0	0	0	0	0	0	0	0	0	0	0	0	2	0	0	0	0	0	0	0	0	0	7	Microperforates_Globigerinita_uvula	Microperforates	Globigerinita	uvula	-	FJ643298_Microperforates_Globigerinita_uvula_I_NA_NA;KM193160_Microperforates_Globigerinita_uvula_NA_NA_NA;KM193079_Microperforates_Globigerinita_uvula_NA_NA_NA;KM193075_Microperforates_Globigerinita_uvula_NA_NA_NA;KM193070_Microperforates_Globigerinita_uvula_NA_NA_NA;	Microperforates	Globigerinita	uvula	I	Microperforates_Globigerinita_uvula_I
ISU1289	2	69	Yes	R-155_2_69_0	0	0	0	0	0	4	0	0	0	0	0	0	0	0	0	0	0	0	0	65	0	0	0	0	0	0	0	0	0	0	0	0	Monolamellar_Hastigerina_pelagica	Monolamellar	Hastigerina	pelagica	-	FJ643384_Monolamellar_Hastigerina_pelagica_NA_NA_NA;FJ643358_Monolamellar_Hastigerina_pelagica_I_NA_NA	Monolamellar	Hastigerina	pelagica	I	Monolamellar_Hastigerina_pelagica_I
ISU129	5	23	Yes	R-303_5_23_1	0	0	0	0	2	6	0	0	0	0	0	0	0	0	0	0	0	0	2	10	0	3	0	0	0	0	0	0	0	0	0	1	Microperforates_Globigerinita_glutinata_III_NA_NA	Microperforates	Globigerinita	glutinata	III	NAFJ643283_Microperforates_Globigerinita_glutinata_III_NA_NA;	Microperforates	Globigerinita	glutinata	III	Microperforates_Globigerinita_glutinata_III
ISU1290	4	4962	Yes	R-14_4_4962_0	0	0	0	0	0	0	0	0	0	0	0	0	205	0	849	0	0	0	0	0	0	0	0	0	0	0	0	0	3839	0	69	0	Non-Spinose_Neogloboquadrina_pachyderma_IV_NA_NA	Non-Spinose	Neogloboquadrina	pachyderma	IV	NAKM193861_Non-Spinose_Neogloboquadrina_pachyderma_IV_NA_NA;KM193530_Non-Spinose_Neogloboquadrina_pachyderma_IV_NA_NA;KM193551_Non-Spinose_Neogloboquadrina_pachyderma_IV_NA_NA;KM193565_Non-Spinose_Neogloboquadrina_pachyderma_IV_NA_NA;KM193614_Non-Spinose_Neogloboquadrina_pachyderma_IV_NA_NA;KM193490_Non-Spinose_Neogloboquadrina_pachyderma_IV_NA_NA;KM193569_Non-Spinose_Neogloboquadrina_pachyderma_…	Non-Spinose	Neogloboquadrina	pachyderma	IV	Non-Spinose_Neogloboquadrina_pachyderma_IV
ISU1291	1	3	NO	-	0	0	0	0	0	0	0	0	0	0	0	3	0	0	0	0	0	0	0	0	0	0	0	0	0	0	0	0	0	0	0	2	Non-Spinose_Neogloboquadrina_pachyderma_I_NA_NA	Non-Spinose	Neogloboquadrina	pachyderma	I	NAAY305329_Non-Spinose_Neogloboquadrina_pachyderma_I_NA_NA;	-	-	-	-	-
ISU1292	2	6	Yes	R-602_2_6_1	0	0	0	0	0	0	0	0	0	0	0	0	0	0	0	0	0	0	0	4	0	2	0	0	0	0	0	0	0	0	0	1	Microperforates_Candeina_nitida_NA_NA_NA	Microperforates	Candeina	nitida	NA	NAAB263435_Microperforates_Candeina_nitida_NA_NA_NA;	Microperforates	Candeina	nitida	I	Microperforates_Candeina_nitida_I
ISU1293	1	2	NO	-	0	0	0	0	0	0	0	0	0	0	0	0	0	0	0	0	0	0	2	0	0	0	0	0	0	0	0	0	0	0	0	2	Microperforates_Globigerinita_glutinata_III_NA_NA	Microperforates	Globigerinita	glutinata	III	NAFJ643283_Microperforates_Globigerinita_glutinata_III_NA_NA;	-	-	-	-	-
ISU1294	2	47	Yes	R-195_2_47_0	0	0	0	0	0	0	15	0	32	0	0	0	0	0	0	0	0	0	0	0	0	0	0	0	0	0	0	0	0	0	0	0	Non-Spinose_Globorotalia_menardii_NA_NA_NA	Non-Spinose	Globorotalia	menardii	NA	NAJQ799896_Non-Spinose_Globorotalia_menardii_NA_NA_NA;KJ633241_Non-Spinose_Globorotalia_menardii_NA_NA_NA;Z83970_Non-Spinose_Globorotalia_menardii_NA_NA_NA;AB263445_Non-Spinose_Globorotalia_menardii_NA_NA_NA	Non-Spinose	Globorotalia	menardii	I	Non-Spinose_Globorotalia_menardii_I
ISU1295	2	4	Yes	R-658_2_4_5	0	0	0	0	0	0	0	0	0	0	0	0	0	0	0	0	0	0	2	2	0	0	0	0	0	0	0	0	0	0	0	5	Microperforates_Globigerinita_uvula	Microperforates	Globigerinita	uvula	-	FJ643298_Microperforates_Globigerinita_uvula_I_NA_NA;KM193070_Microperforates_Globigerinita_uvula_NA_NA_NA;KM193079_Microperforates_Globigerinita_uvula_NA_NA_NA;	Microperforates	Globigerinita	glutinata	III	Microperforates_Globigerinita_glutinata_III
ISU1296	1	3	NO	-	0	0	0	0	0	3	0	0	0	0	0	0	0	0	0	0	0	0	0	0	0	0	0	0	0	0	0	0	0	0	0	1	Microperforates_Globigerinita_glutinata_III_NA_NA	Microperforates	Globigerinita	glutinata	III	NAFJ643277_Microperforates_Globigerinita_glutinata_III_NA_NA;	-	-	-	-	-
ISU1297	5	15	Yes	R-380_5_15_1	0	0	0	0	2	2	0	0	0	0	0	0	0	0	0	0	0	0	3	2	0	6	0	0	0	0	0	0	0	0	0	1	Microperforates_Globigerinita_glutinata	Microperforates	Globigerinita	glutinata	-	FJ643296_Microperforates_Globigerinita_glutinata_III_NA_NA;KM193199_Microperforates_Globigerinita_glutinata_NA_NA_NA;FJ643277_Microperforates_Globigerinita_glutinata_III_NA_NA;AY453136_Microperforates_Globigerinita_glutinata_III_NA_NA;JQ799900_Microperforates_Globigerinita_glutinata_IV_NA_NA;	Microperforates	Globigerinita	glutinata	III	Microperforates_Globigerinita_glutinata_III
ISU1298	1	4	NO	-	0	0	0	0	0	0	0	0	0	0	0	4	0	0	0	0	0	0	0	0	0	0	0	0	0	0	0	0	0	0	0	1	Non-Spinose_Neogloboquadrina_pachyderma_I_NA_NA	Non-Spinose	Neogloboquadrina	pachyderma	I	NAAY305329_Non-Spinose_Neogloboquadrina_pachyderma_I_NA_NA;	-	-	-	-	-
ISU1299	1	2	NO	-	0	0	0	0	0	0	0	0	0	0	0	0	0	0	0	0	0	0	0	2	0	0	0	0	0	0	0	0	0	0	0	6	Microperforates_Globigerinita_uvula	Microperforates	Globigerinita	uvula	-	FJ643298_Microperforates_Globigerinita_uvula_I_NA_NA;KM193160_Microperforates_Globigerinita_uvula_NA_NA_NA;KM193075_Microperforates_Globigerinita_uvula_NA_NA_NA;KM193070_Microperforates_Globigerinita_uvula_NA_NA_NA;KM193079_Microperforates_Globigerinita_uvula_NA_NA_NA;	-	-	-	-	-
ISU13	2	4	Yes	R-667_2_4_7	0	0	0	0	2	2	0	0	0	0	0	0	0	0	0	0	0	0	0	0	0	0	0	0	0	0	0	0	0	0	0	7	Microperforates_Globigerinita_uvula	Microperforates	Globigerinita	uvula	-	FJ643298_Microperforates_Globigerinita_uvula_I_NA_NA;KM193160_Microperforates_Globigerinita_uvula_NA_NA_NA;KM193079_Microperforates_Globigerinita_uvula_NA_NA_NA;KM193075_Microperforates_Globigerinita_uvula_NA_NA_NA;KM193070_Microperforates_Globigerinita_uvula_NA_NA_NA;	Microperforates	Globigerinita	uvula	I	Microperforates_Globigerinita_uvula_I
ISU130	1	3	NO	-	0	0	0	0	0	3	0	0	0	0	0	0	0	0	0	0	0	0	0	0	0	0	0	0	0	0	0	0	0	0	0	6	Microperforates_Globigerinita_glutinata	Microperforates	Globigerinita	glutinata	-	FJ643286_Microperforates_Globigerinita_glutinata_I_NA_NA;KM193484_Microperforates_Globigerinita_glutinata_NA_NA_NA	-	-	-	-	-
ISU1300	2	6	Yes	R-562_2_6_6	0	0	0	0	0	2	0	0	0	0	0	0	0	0	0	0	0	0	0	4	0	0	0	0	0	0	0	0	0	0	0	6	Microperforates_Globigerinita_uvula	Microperforates	Globigerinita	uvula	-	FJ643298_Microperforates_Globigerinita_uvula_I_NA_NA;KM193079_Microperforates_Globigerinita_uvula_NA_NA_NA;KM193070_Microperforates_Globigerinita_uvula_NA_NA_NA;	Microperforates	Globigerinita	glutinata	III	Microperforates_Globigerinita_glutinata_III
ISU1301	4	94	Yes	R-127_4_94_1	0	0	0	0	2	84	0	0	0	0	0	0	0	0	0	0	0	0	0	4	0	4	0	0	0	0	0	0	0	0	0	1	Microperforates_Globigerinita_glutinata_III_NA_NA	Microperforates	Globigerinita	glutinata	III	NAFJ643283_Microperforates_Globigerinita_glutinata_III_NA_NA;	Microperforates	Globigerinita	glutinata	I	Microperforates_Globigerinita_glutinata_I
ISU1302	1	2	NO	-	0	0	0	0	0	0	0	0	0	0	0	0	2	0	0	0	0	0	0	0	0	0	0	0	0	0	0	0	0	0	0	1	Non-Spinose_Neogloboquadrina_pachyderma_IV_NA_NA	Non-Spinose	Neogloboquadrina	pachyderma	IV	NAKM193861_Non-Spinose_Neogloboquadrina_pachyderma_IV_NA_NA;KM193530_Non-Spinose_Neogloboquadrina_pachyderma_IV_NA_NA;KM193551_Non-Spinose_Neogloboquadrina_pachyderma_IV_NA_NA;KM193565_Non-Spinose_Neogloboquadrina_pachyderma_IV_NA_NA;KM193614_Non-Spinose_Neogloboquadrina_pachyderma_IV_NA_NA;KM193550_Non-Spinose_Neogloboquadrina_pachyderma_IV_NA_NA;KM193490_Non-Spinose_Neogloboquadrina_pachyderma_…	-	-	-	-	-
ISU1303	1	2	NO	-	0	0	0	0	0	2	0	0	0	0	0	0	0	0	0	0	0	0	0	0	0	0	0	0	0	0	0	0	0	0	0	2	Microperforates_Globigerinita_glutinata	Microperforates	Globigerinita	glutinata	-	JQ799900_Microperforates_Globigerinita_glutinata_IV_NA_NA;FJ643296_Microperforates_Globigerinita_glutinata_III_NA_NA;FJ643277_Microperforates_Globigerinita_glutinata_III_NA_NA;KM193199_Microperforates_Globigerinita_glutinata_NA_NA_NA;AY453136_Microperforates_Globigerinita_glutinata_III_NA_NA;	-	-	-	-	-
ISU1304	1	50	Yes	R-186_1_50_6	0	0	0	0	0	50	0	0	0	0	0	0	0	0	0	0	0	0	0	0	0	0	0	0	0	0	0	0	0	0	0	6	Microperforates_Globigerinita_glutinata	Microperforates	Globigerinita	glutinata	-	FJ643294_Microperforates_Globigerinita_glutinata_I_NA_NA;FJ643286_Microperforates_Globigerinita_glutinata_I_NA_NA;KM193484_Microperforates_Globigerinita_glutinata_NA_NA_NA;KM193497_Microperforates_Globigerinita_glutinata_NA_NA_NA;FJ643283_Microperforates_Globigerinita_glutinata_III_NA_NA;KM193151_Microperforates_Globigerinita_glutinata_NA_NA_NA	Microperforates	Globigerinita	glutinata	III	Microperforates_Globigerinita_glutinata_III
ISU1305	3	10	Yes	R-450_3_10_6	0	0	0	0	0	3	0	0	0	0	0	0	0	0	0	0	0	0	0	5	0	2	0	0	0	0	0	0	0	0	0	6	Microperforates_Globigerinita_glutinata	Microperforates	Globigerinita	glutinata	-	FJ643294_Microperforates_Globigerinita_glutinata_I_NA_NA;FJ643286_Microperforates_Globigerinita_glutinata_I_NA_NA;KM193484_Microperforates_Globigerinita_glutinata_NA_NA_NA;KM193497_Microperforates_Globigerinita_glutinata_NA_NA_NA;FJ643283_Microperforates_Globigerinita_glutinata_III_NA_NA;KM193151_Microperforates_Globigerinita_glutinata_NA_NA_NA	Microperforates	Globigerinita	glutinata	I	Microperforates_Globigerinita_glutinata_I
ISU1306	2	518	Yes	R-39_2_518_2	0	0	0	0	262	256	0	0	0	0	0	0	0	0	0	0	0	0	0	0	0	0	0	0	0	0	0	0	0	0	0	2	Microperforates_Globigerinita_glutinata	Microperforates	Globigerinita	glutinata	-	KM193497_Microperforates_Globigerinita_glutinata_NA_NA_NA;KM193151_Microperforates_Globigerinita_glutinata_NA_NA_NA;FJ643283_Microperforates_Globigerinita_glutinata_III_NA_NA;FJ643294_Microperforates_Globigerinita_glutinata_I_NA_NA	Microperforates	Globigerinita	glutinata	III	Microperforates_Globigerinita_glutinata_III
ISU1307	1	2	NO	-	0	0	0	0	0	0	0	0	0	0	0	0	0	0	0	0	0	0	0	2	0	0	0	0	0	0	0	0	0	0	0	2	Microperforates_Globigerinita_glutinata	Microperforates	Globigerinita	glutinata	-	JQ799900_Microperforates_Globigerinita_glutinata_IV_NA_NA;FJ643296_Microperforates_Globigerinita_glutinata_III_NA_NA;KM193199_Microperforates_Globigerinita_glutinata_NA_NA_NA;AY453136_Microperforates_Globigerinita_glutinata_III_NA_NA	-	-	-	-	-
ISU1308	1	2	NO	-	0	0	0	0	0	2	0	0	0	0	0	0	0	0	0	0	0	0	0	0	0	0	0	0	0	0	0	0	0	0	0	7	Microperforates_Globigerinita_uvula	Microperforates	Globigerinita	uvula	-	FJ643298_Microperforates_Globigerinita_uvula_I_NA_NA;KM193079_Microperforates_Globigerinita_uvula_NA_NA_NA;KM193070_Microperforates_Globigerinita_uvula_NA_NA_NA;	-	-	-	-	-
ISU1309	1	2	NO	-	0	0	0	0	0	0	0	0	0	0	0	2	0	0	0	0	0	0	0	0	0	0	0	0	0	0	0	0	0	0	0	2	Non-Spinose_Neogloboquadrina_pachyderma_I_NA_NA	Non-Spinose	Neogloboquadrina	pachyderma	I	NAAY305329_Non-Spinose_Neogloboquadrina_pachyderma_I_NA_NA;	-	-	-	-	-
ISU131	1	2	NO	-	0	0	0	0	0	0	0	0	0	0	0	0	0	0	0	0	0	0	0	2	0	0	0	0	0	0	0	0	0	0	0	5	Microperforates_Globigerinita_uvula	Microperforates	Globigerinita	uvula	-	FJ643298_Microperforates_Globigerinita_uvula_I_NA_NA;KM193160_Microperforates_Globigerinita_uvula_NA_NA_NA;KM193075_Microperforates_Globigerinita_uvula_NA_NA_NA;KM193070_Microperforates_Globigerinita_uvula_NA_NA_NA;KM193079_Microperforates_Globigerinita_uvula_NA_NA_NA;	-	-	-	-	-
ISU1310	2	7	Yes	R-552_2_7_1	0	0	0	0	0	2	0	0	0	0	0	0	0	0	0	0	0	0	0	0	0	5	0	0	0	0	0	0	0	0	0	1	Microperforates_Globigerinita_glutinata_III_NA_NA	Microperforates	Globigerinita	glutinata	III	NAFJ643283_Microperforates_Globigerinita_glutinata_III_NA_NA;	Microperforates	Globigerinita	glutinata	III	Microperforates_Globigerinita_glutinata_III
ISU1311	2	7	Yes	R-549_2_7_1	0	0	0	0	0	0	0	0	0	0	0	0	0	0	0	0	0	0	2	5	0	0	0	0	0	0	0	0	0	0	0	1	Microperforates_Globigerinita_glutinata	Microperforates	Globigerinita	glutinata	-	FJ643418_Microperforates_Globigerinita_glutinata_NA_NA_NA;AB468829_Microperforates_Globigerinita_glutinata_II_NA_NA	Microperforates	Globigerinita	glutinata	II	Microperforates_Globigerinita_glutinata_II
ISU1312	1	2	NO	-	0	0	0	0	0	0	0	0	0	0	0	0	0	0	0	0	0	0	2	0	0	0	0	0	0	0	0	0	0	0	0	1	Microperforates_Globigerinita_glutinata_III_NA_NA	Microperforates	Globigerinita	glutinata	III	NAFJ643277_Microperforates_Globigerinita_glutinata_III_NA_NA;	-	-	-	-	-
ISU1313	1	2	NO	-	0	0	0	0	0	0	0	0	0	0	0	0	0	0	0	0	0	0	2	0	0	0	0	0	0	0	0	0	0	0	0	1	Microperforates_Globigerinita_glutinata	Microperforates	Globigerinita	glutinata	-	JQ799900_Microperforates_Globigerinita_glutinata_IV_NA_NA;FJ643296_Microperforates_Globigerinita_glutinata_III_NA_NA;FJ643277_Microperforates_Globigerinita_glutinata_III_NA_NA;KM193199_Microperforates_Globigerinita_glutinata_NA_NA_NA;AY453136_Microperforates_Globigerinita_glutinata_III_NA_NA;	-	-	-	-	-
ISU1314	2	4	Yes	R-684_2_4_1	0	0	0	0	0	0	0	0	0	0	0	0	0	0	0	0	0	0	0	2	0	2	0	0	0	0	0	0	0	0	0	1	Microperforates_Globigerinita_glutinata	Microperforates	Globigerinita	glutinata	-	KM193199_Microperforates_Globigerinita_glutinata_NA_NA_NA;AY453136_Microperforates_Globigerinita_glutinata_III_NA_NA;JQ799900_Microperforates_Globigerinita_glutinata_IV_NA_NA;	Microperforates	Globigerinita	glutinata	III	Microperforates_Globigerinita_glutinata_III
ISU1315	1	2	NO	-	0	0	0	0	0	2	0	0	0	0	0	0	0	0	0	0	0	0	0	0	0	0	0	0	0	0	0	0	0	0	0	1	Spinose_Globigerina_bulloides	Spinose	Globigerina	bulloides	-	Z83957_Spinose_Globigerina_bulloides_NA_NA_NA;GQ293072_Spinose_Globigerina_bulloides_I_c_NA;GQ293070_Spinose_Globigerina_bulloides_I_d_NA;GU060421_Spinose_Globigerina_bulloides_I_e_NA	-	-	-	-	-
ISU1316	2	5	Yes	R-613_2_5_1	0	0	0	0	0	0	0	0	0	0	0	0	0	0	0	0	0	0	0	2	0	3	0	0	0	0	0	0	0	0	0	1	Microperforates_Candeina_nitida_NA_NA_NA	Microperforates	Candeina	nitida	NA	NAAB263435_Microperforates_Candeina_nitida_NA_NA_NA;	Microperforates	Globigerinita	glutinata	II	Microperforates_Globigerinita_glutinata_II
ISU1317	3	47	Yes	R-697_3_47_7	5	0	0	0	38	4	0	0	0	0	0	0	0	0	0	0	0	0	0	0	0	0	0	0	0	0	0	0	0	0	0	7	Non-Spinose_Globoquadrina_conglomerata_NA_NA_NA	Non-Spinose	Globoquadrina	conglomerata	NA	NAKJ633133_Non-Spinose_Globoquadrina_conglomerata_NA_NA_NA;KJ633130_Non-Spinose_Globoquadrina_conglomerata_NA_NA_NA	Unidentified	Globoquadrina	conglomerata	U2	Unidentified_Globoquadrina_conglomerata_U2
ISU1318	1	2	NO	-	0	0	0	0	0	0	0	0	0	0	0	0	0	0	0	0	0	0	0	2	0	0	0	0	0	0	0	0	0	0	0	1	Microperforates_Globigerinita_glutinata	Microperforates	Globigerinita	glutinata	-	FJ643418_Microperforates_Globigerinita_glutinata_NA_NA_NA;AB468827_Microperforates_Globigerinita_glutinata_II_NA_NA;AB468829_Microperforates_Globigerinita_glutinata_II_NA_NA;	-	-	-	-	-
ISU1319	4	11	Yes	R-440_4_11_1	0	0	0	0	2	3	0	0	0	0	0	0	0	0	0	0	0	0	2	4	0	0	0	0	0	0	0	0	0	0	0	1	Microperforates_Candeina_nitida_NA_NA_NA	Microperforates	Candeina	nitida	NA	NAAB263435_Microperforates_Candeina_nitida_NA_NA_NA;	Microperforates	Candeina	nitida	I	Microperforates_Candeina_nitida_I
ISU132	1	3	NO	-	0	3	0	0	0	0	0	0	0	0	0	0	0	0	0	0	0	0	0	0	0	0	0	0	0	0	0	0	0	0	0	1	Microperforates_Globigerinita_uvula_NA_NA_NA	Microperforates	Globigerinita	uvula	NA	NAKM193364_Microperforates_Globigerinita_uvula_NA_NA_NA;	-	-	-	-	-
ISU1320	3	10	Yes	R-458_3_10_1	0	0	0	0	0	0	0	0	0	0	0	0	2	0	2	0	0	0	0	0	0	0	0	0	0	0	0	0	6	0	0	1	Non-Spinose_Neogloboquadrina_pachyderma_IV_NA_NA	Non-Spinose	Neogloboquadrina	pachyderma	IV	NAKM193861_Non-Spinose_Neogloboquadrina_pachyderma_IV_NA_NA;KM193530_Non-Spinose_Neogloboquadrina_pachyderma_IV_NA_NA;KM193551_Non-Spinose_Neogloboquadrina_pachyderma_IV_NA_NA;KM193565_Non-Spinose_Neogloboquadrina_pachyderma_IV_NA_NA;KM193614_Non-Spinose_Neogloboquadrina_pachyderma_IV_NA_NA;KM193490_Non-Spinose_Neogloboquadrina_pachyderma_IV_NA_NA;KM193569_Non-Spinose_Neogloboquadrina_pachyderma_…	Non-Spinose	Neogloboquadrina	pachyderma	IV	Non-Spinose_Neogloboquadrina_pachyderma_IV
ISU1321	1	2	NO	-	0	0	0	0	0	0	0	0	0	0	0	0	0	0	0	0	0	0	0	2	0	0	0	0	0	0	0	0	0	0	0	2	Microperforates_Globigerinita_glutinata_III_NA_NA	Microperforates	Globigerinita	glutinata	III	NAFJ643283_Microperforates_Globigerinita_glutinata_III_NA_NA;	-	-	-	-	-
ISU1322	1	3	NO	-	0	0	0	0	0	0	0	0	0	0	0	3	0	0	0	0	0	0	0	0	0	0	0	0	0	0	0	0	0	0	0	1	Non-Spinose_Neogloboquadrina_pachyderma_I_NA_NA	Non-Spinose	Neogloboquadrina	pachyderma	I	NAAY305329_Non-Spinose_Neogloboquadrina_pachyderma_I_NA_NA;	-	-	-	-	-
ISU1323	2	7	Yes	R-523_2_7_1	5	0	0	0	0	0	0	0	0	0	0	0	0	0	0	0	0	0	0	0	0	0	0	0	0	0	0	0	0	0	2	1	Microperforates_Globigerinita_uvula	Microperforates	Globigerinita	uvula	-	KM193181_Microperforates_Globigerinita_uvula_NA_NA_NA;KM193691_Microperforates_Globigerinita_uvula_NA_NA_NA;KM193364_Microperforates_Globigerinita_uvula_NA_NA_NA;AF387173_Microperforates_Globigerinita_uvula_II_NA_NA;KM194324_Microperforates_Globigerinita_uvula_NA_NA_NA;	Microperforates	Globigerinita	uvula	II	Microperforates_Globigerinita_uvula_II
ISU1324	1	4	NO	-	0	0	0	0	0	0	0	0	0	0	0	0	0	0	0	0	0	0	0	0	0	4	0	0	0	0	0	0	0	0	0	1	Microperforates_Globigerinita_glutinata	Microperforates	Globigerinita	glutinata	-	KM193199_Microperforates_Globigerinita_glutinata_NA_NA_NA;AY453136_Microperforates_Globigerinita_glutinata_III_NA_NA;JQ799900_Microperforates_Globigerinita_glutinata_IV_NA_NA;	-	-	-	-	-
ISU1325	4	23	Yes	R-305_4_23_1	0	0	0	0	0	3	0	0	0	0	0	0	0	0	0	0	0	0	8	7	0	5	0	0	0	0	0	0	0	0	0	1	Microperforates_Globigerinita_glutinata	Microperforates	Globigerinita	glutinata	-	JQ799900_Microperforates_Globigerinita_glutinata_IV_NA_NA;FJ643296_Microperforates_Globigerinita_glutinata_III_NA_NA;KM193199_Microperforates_Globigerinita_glutinata_NA_NA_NA;AY453136_Microperforates_Globigerinita_glutinata_III_NA_NA	Microperforates	Globigerinita	glutinata	III	Microperforates_Globigerinita_glutinata_III
ISU1326	4	427	Yes	R-41_4_427_4	0	0	0	0	0	4	0	0	0	0	0	0	0	0	0	0	0	0	2	4	0	417	0	0	0	0	0	0	0	0	0	4	Microperforates_Globigerinita_uvula	Microperforates	Globigerinita	uvula	-	FJ643298_Microperforates_Globigerinita_uvula_I_NA_NA;KM193079_Microperforates_Globigerinita_uvula_NA_NA_NA;KM193070_Microperforates_Globigerinita_uvula_NA_NA_NA;	Microperforates	Globigerinita	uvula	I	Microperforates_Globigerinita_uvula_I
ISU1327	1	2	NO	-	0	0	0	0	0	2	0	0	0	0	0	0	0	0	0	0	0	0	0	0	0	0	0	0	0	0	0	0	0	0	0	1	Monolamellar_Hastigerina_pelagica	Monolamellar	Hastigerina	pelagica	-	FJ643408_Monolamellar_Hastigerina_pelagica_II_a_NA;KM194103_Monolamellar_Hastigerina_pelagica_NA_NA_NA;FJ643367_Monolamellar_Hastigerina_pelagica_II_a_NA;FJ643402_Monolamellar_Hastigerina_pelagica_NA_NA_NA	-	-	-	-	-
ISU1328	1	2	NO	-	0	0	0	0	0	0	0	0	0	0	0	0	0	0	0	0	0	0	2	0	0	0	0	0	0	0	0	0	0	0	0	1	Microperforates_Globigerinita_glutinata	Microperforates	Globigerinita	glutinata	-	JQ799900_Microperforates_Globigerinita_glutinata_IV_NA_NA;FJ643296_Microperforates_Globigerinita_glutinata_III_NA_NA;FJ643277_Microperforates_Globigerinita_glutinata_III_NA_NA;KM193199_Microperforates_Globigerinita_glutinata_NA_NA_NA;AY453136_Microperforates_Globigerinita_glutinata_III_NA_NA;	-	-	-	-	-
ISU1329	2	36	Yes	R-233_2_36_1	0	0	0	0	0	4	0	0	0	0	0	0	0	0	0	0	0	0	0	32	0	0	0	0	0	0	0	0	0	0	0	1	Monolamellar_Hastigerina_pelagica	Monolamellar	Hastigerina	pelagica	-	FJ643384_Monolamellar_Hastigerina_pelagica_NA_NA_NA;FJ643358_Monolamellar_Hastigerina_pelagica_I_NA_NA	Monolamellar	Hastigerina	pelagica	I	Monolamellar_Hastigerina_pelagica_I
ISU133	1	27	Yes	R-279_1_27_6	0	0	0	0	27	0	0	0	0	0	0	0	0	0	0	0	0	0	0	0	0	0	0	0	0	0	0	0	0	0	0	6	Non-Spinose_Pulleniatina_obliquiloculata	Non-Spinose	Pulleniatina	obliquiloculata	-	AB636785_Non-Spinose_Pulleniatina_obliquiloculata_I_NA_NA;AB636702_Non-Spinose_Pulleniatina_obliquiloculata_I_NA_NA;AB636797_Non-Spinose_Pulleniatina_obliquiloculata_I_NA_NA;AB636772_Non-Spinose_Pulleniatina_obliquiloculata_I_NA_NA;AB636705_Non-Spinose_Pulleniatina_obliquiloculata_II_a_NA;AB636699_Non-Spinose_Pulleniatina_obliquiloculata_I_NA_NA;AB636708_Non-Spinose_Pulleniatina_obliquiloculata_I…	Non-Spinose	Pulleniatina	obliquiloculata	II	Non-Spinose_Pulleniatina_obliquiloculata_II
ISU1330	3	8	Yes	R-505_3_8_5	0	0	0	0	0	3	0	0	0	0	0	0	0	0	0	0	0	0	2	3	0	0	0	0	0	0	0	0	0	0	0	5	Microperforates_Globigerinita_uvula	Microperforates	Globigerinita	uvula	-	FJ643298_Microperforates_Globigerinita_uvula_I_NA_NA;KM193079_Microperforates_Globigerinita_uvula_NA_NA_NA;KM193070_Microperforates_Globigerinita_uvula_NA_NA_NA;	Microperforates	Globigerinita	uvula	I	Microperforates_Globigerinita_uvula_I
ISU1331	3	572	Yes	R-37_3_572_5	0	0	0	0	0	0	0	0	0	0	0	0	0	508	0	0	0	0	0	0	0	0	0	0	0	0	0	0	0	59	5	5	Spinose_Globigerina_bulloides_II	Spinose	Globigerina	bulloides	II	KM193333_Spinose_Globigerina_bulloides_II_a_NA;AF250106_Spinose_Globigerina_bulloides_II_d_NA;KM193474_Spinose_Globigerina_bulloides_II_b_NA;GQ293069_Spinose_Globigerina_bulloides_II_f_NA;KM193709_Spinose_Globigerina_bulloides_II_c_NA;KM193700_Spinose_Globigerina_bulloides_II_a_NA;AF250111_Spinose_Globigerina_bulloides_II_c_NA;KM193605_Spinose_Globigerina_bulloides_II_a_NA	Spinose	Globigerina	bulloides	II	Spinose_Globigerina_bulloides_II
ISU1332	4	24	Yes	R-295_4_24_1	0	0	0	0	0	7	0	0	0	0	0	0	0	0	0	0	0	0	3	6	0	8	0	0	0	0	0	0	0	0	0	1	Microperforates_Globigerinita_glutinata	Microperforates	Globigerinita	glutinata	-	JQ799900_Microperforates_Globigerinita_glutinata_IV_NA_NA;FJ643296_Microperforates_Globigerinita_glutinata_III_NA_NA;KM193199_Microperforates_Globigerinita_glutinata_NA_NA_NA;AY453136_Microperforates_Globigerinita_glutinata_III_NA_NA	Microperforates	Globigerinita	glutinata	III	Microperforates_Globigerinita_glutinata_III
ISU1333	1	3	NO	-	0	0	0	0	0	0	0	0	0	0	0	0	0	0	0	0	0	0	0	3	0	0	0	0	0	0	0	0	0	0	0	6	Microperforates_Globigerinita_glutinata	Microperforates	Globigerinita	glutinata	-	FJ643286_Microperforates_Globigerinita_glutinata_I_NA_NA;KM193484_Microperforates_Globigerinita_glutinata_NA_NA_NA	-	-	-	-	-
ISU1334	1	2	NO	-	0	0	0	0	0	0	0	0	0	0	0	0	0	0	0	0	0	0	0	0	0	2	0	0	0	0	0	0	0	0	0	3	Microperforates_Globigerinita_glutinata	Microperforates	Globigerinita	glutinata	-	KM193497_Microperforates_Globigerinita_glutinata_NA_NA_NA;FJ643294_Microperforates_Globigerinita_glutinata_I_NA_NA;KM193151_Microperforates_Globigerinita_glutinata_NA_NA_NA;	-	-	-	-	-
ISU1335	1	2	NO	-	0	2	0	0	0	0	0	0	0	0	0	0	0	0	0	0	0	0	0	0	0	0	0	0	0	0	0	0	0	0	0	3	Non-Spinose_Neogloboquadrina_pachyderma_VII_NA_NA	Non-Spinose	Neogloboquadrina	pachyderma	VII	NAKM193488_Non-Spinose_Neogloboquadrina_pachyderma_VII_NA_NA;KM193499_Non-Spinose_Neogloboquadrina_pachyderma_VII_NA_NA;KM193277_Non-Spinose_Neogloboquadrina_pachyderma_VII_NA_NA;KM193200_Non-Spinose_Neogloboquadrina_pachyderma_VII_NA_NA;EF447103_Non-Spinose_Neogloboquadrina_pachyderma_VII_NA_NA;AY453137_Non-Spinose_Neogloboquadrina_pachyderma_VII_NA_NA;KM193153_Non-Spinose_Neogloboquadrina_pachy…	-	-	-	-	-
ISU1336	1	2	NO	-	0	0	0	0	0	0	0	0	0	0	0	0	0	0	0	0	0	0	0	0	0	2	0	0	0	0	0	0	0	0	0	1	Spinose_Globigerina_bulloides	Spinose	Globigerina	bulloides	-	GQ293072_Spinose_Globigerina_bulloides_I_c_NA;GU060421_Spinose_Globigerina_bulloides_I_e_NA;GQ293070_Spinose_Globigerina_bulloides_I_d_NA;Z83957_Spinose_Globigerina_bulloides_NA_NA_NA	-	-	-	-	-
ISU1337	2	25	Yes	R-288_2_25_3	0	3	0	0	0	0	0	0	0	0	0	22	0	0	0	0	0	0	0	0	0	0	0	0	0	0	0	0	0	0	0	3	Non-Spinose_Neogloboquadrina_pachyderma_I_NA_NA	Non-Spinose	Neogloboquadrina	pachyderma	I	NAAY305329_Non-Spinose_Neogloboquadrina_pachyderma_I_NA_NA;	Non-Spinose	Neogloboquadrina	pachyderma	I	Non-Spinose_Neogloboquadrina_pachyderma_I
ISU1338	2	4	Yes	R-687_2_4_6	0	0	0	0	0	0	0	0	0	0	0	0	0	0	0	0	0	0	2	0	0	2	0	0	0	0	0	0	0	0	0	6	Microperforates_Globigerinita_glutinata	Microperforates	Globigerinita	glutinata	-	JQ799900_Microperforates_Globigerinita_glutinata_IV_NA_NA;FJ643288_Microperforates_Globigerinita_glutinata_I_NA_NA;KM193539_Microperforates_Globigerinita_glutinata_NA_NA_NA;KM193303_Microperforates_Globigerinita_glutinata_NA_NA_NA;FJ643296_Microperforates_Globigerinita_glutinata_III_NA_NA;FJ643277_Microperforates_Globigerinita_glutinata_III_NA_NA;KM193199_Microperforates_Globigerinita_glutinata_N…	Microperforates	Globigerinita	glutinata	I	Microperforates_Globigerinita_glutinata_I
ISU1339	1	6	NO	-	0	0	0	0	0	0	0	0	0	0	6	0	0	0	0	0	0	0	0	0	0	0	0	0	0	0	0	0	0	0	0	1	Non-Spinose_Neogloboquadrina_pachyderma_I_NA_NA	Non-Spinose	Neogloboquadrina	pachyderma	I	NAAY305329_Non-Spinose_Neogloboquadrina_pachyderma_I_NA_NA;	-	-	-	-	-
ISU134	6	67	Yes	R-159_6_67_4	0	0	0	2	2	6	0	0	0	0	0	0	0	0	0	0	0	0	4	47	0	6	0	0	0	0	0	0	0	0	0	4	Microperforates_Globigerinita_glutinata	Microperforates	Globigerinita	glutinata	-	FJ643296_Microperforates_Globigerinita_glutinata_III_NA_NA;KM193303_Microperforates_Globigerinita_glutinata_NA_NA_NA;AY453136_Microperforates_Globigerinita_glutinata_III_NA_NA;KM193199_Microperforates_Globigerinita_glutinata_NA_NA_NA;FJ643277_Microperforates_Globigerinita_glutinata_III_NA_NA;JQ799900_Microperforates_Globigerinita_glutinata_IV_NA_NA;FJ643288_Microperforates_Globigerinita_glutinata…	Microperforates	Globigerinita	glutinata	III	Microperforates_Globigerinita_glutinata_III
ISU1340	2	4	Yes	R-692_2_4_2	0	0	0	0	0	0	0	0	0	0	0	0	0	0	0	0	0	0	0	2	0	2	0	0	0	0	0	0	0	0	0	2	Microperforates_Globigerinita_glutinata	Microperforates	Globigerinita	glutinata	-	JQ799900_Microperforates_Globigerinita_glutinata_IV_NA_NA;FJ643296_Microperforates_Globigerinita_glutinata_III_NA_NA;KM193199_Microperforates_Globigerinita_glutinata_NA_NA_NA;AY453136_Microperforates_Globigerinita_glutinata_III_NA_NA	Microperforates	Globigerinita	glutinata	III	Microperforates_Globigerinita_glutinata_III
ISU1341	2	13	Yes	R-401_2_13_1	0	0	0	0	0	0	0	0	0	0	0	0	0	0	0	0	0	0	2	0	0	11	0	0	0	0	0	0	0	0	0	1	Spinose_Globigerina_bulloides	Spinose	Globigerina	bulloides	-	Z83957_Spinose_Globigerina_bulloides_NA_NA_NA;GQ293072_Spinose_Globigerina_bulloides_I_c_NA;GQ293070_Spinose_Globigerina_bulloides_I_d_NA;GU060421_Spinose_Globigerina_bulloides_I_e_NA	Spinose	Globigerina	bulloides	I	Spinose_Globigerina_bulloides_I
ISU1342	2	4	Yes	R-693_2_4_4	0	0	0	0	2	2	0	0	0	0	0	0	0	0	0	0	0	0	0	0	0	0	0	0	0	0	0	0	0	0	0	4	Microperforates_Globigerinita_glutinata	Microperforates	Globigerinita	glutinata	-	KM193484_Microperforates_Globigerinita_glutinata_NA_NA_NA;FJ643286_Microperforates_Globigerinita_glutinata_I_NA_NA	Microperforates	Globigerinita	glutinata	III	Microperforates_Globigerinita_glutinata_III
ISU1343	2	5	Yes	R-642_2_5_2	0	0	0	0	0	0	0	0	0	0	0	0	0	0	0	0	0	0	2	0	0	3	0	0	0	0	0	0	0	0	0	2	Microperforates_Globigerinita_glutinata	Microperforates	Globigerinita	glutinata	-	KM193484_Microperforates_Globigerinita_glutinata_NA_NA_NA;FJ643286_Microperforates_Globigerinita_glutinata_I_NA_NA	Microperforates	Globigerinita	glutinata	II	Microperforates_Globigerinita_glutinata_II
ISU1344	1	2	NO	-	0	0	0	0	0	0	0	0	0	0	0	0	0	0	0	0	0	0	0	0	0	2	0	0	0	0	0	0	0	0	0	1	Microperforates_Globigerinita_glutinata	Microperforates	Globigerinita	glutinata	-	FJ643296_Microperforates_Globigerinita_glutinata_III_NA_NA;JQ799900_Microperforates_Globigerinita_glutinata_IV_NA_NA;KM193199_Microperforates_Globigerinita_glutinata_NA_NA_NA;AY453136_Microperforates_Globigerinita_glutinata_III_NA_NA	-	-	-	-	-
ISU1345	1	3	NO	-	0	0	0	0	0	0	0	0	0	0	0	0	0	0	0	0	0	0	0	0	0	3	0	0	0	0	0	0	0	0	0	1	Microperforates_Globigerinita_glutinata_III_NA_NA	Microperforates	Globigerinita	glutinata	III	NAFJ643277_Microperforates_Globigerinita_glutinata_III_NA_NA;	-	-	-	-	-
ISU1346	3	8	Yes	R-503_3_8_1	0	0	0	0	0	0	0	0	0	2	3	3	0	0	0	0	0	0	0	0	0	0	0	0	0	0	0	0	0	0	0	1	Non-Spinose_Neogloboquadrina_pachyderma_I_NA_NA	Non-Spinose	Neogloboquadrina	pachyderma	I	NAAY305329_Non-Spinose_Neogloboquadrina_pachyderma_I_NA_NA;	Non-Spinose	Neogloboquadrina	pachyderma	I	Non-Spinose_Neogloboquadrina_pachyderma_I
ISU1347	7	1860	Yes	R-21_7_1860_4	0	0	0	46	370	392	0	0	0	0	0	0	0	0	0	0	0	0	80	723	0	247	2	0	0	0	0	0	0	0	0	4	Microperforates_Candeina_nitida_NA_NA_NA	Microperforates	Candeina	nitida	NA	NAAB263435_Microperforates_Candeina_nitida_NA_NA_NA;AB468836_Microperforates_Candeina_nitida_NA_NA_NA;KJ633212_Microperforates_Candeina_nitida_NA_NA_NA;AB468837_Microperforates_Candeina_nitida_NA_NA_NA	Microperforates	Candeina	nitida	I	Microperforates_Candeina_nitida_I
ISU1348	1	2	NO	-	0	0	0	0	0	2	0	0	0	0	0	0	0	0	0	0	0	0	0	0	0	0	0	0	0	0	0	0	0	0	0	5	Microperforates_Globigerinita_uvula	Microperforates	Globigerinita	uvula	-	FJ643298_Microperforates_Globigerinita_uvula_I_NA_NA;KM193079_Microperforates_Globigerinita_uvula_NA_NA_NA;KM193070_Microperforates_Globigerinita_uvula_NA_NA_NA;	-	-	-	-	-
ISU1349	1	2	NO	-	0	0	0	0	0	0	0	0	0	0	0	0	0	0	0	0	0	0	0	0	0	2	0	0	0	0	0	0	0	0	0	2	Microperforates_Globigerinita_glutinata	Microperforates	Globigerinita	glutinata	-	KM193484_Microperforates_Globigerinita_glutinata_NA_NA_NA;FJ643286_Microperforates_Globigerinita_glutinata_I_NA_NA	-	-	-	-	-
ISU135	7	3110	Yes	R-20_7_3110_1	100	546	70	0	0	0	0	0	0	0	9	2270	0	0	0	63	52	0	0	0	0	0	0	0	0	0	0	0	0	0	0	1	Non-Spinose_Neogloboquadrina_pachyderma_I_NA_NA	Non-Spinose	Neogloboquadrina	pachyderma	I	NAAY305329_Non-Spinose_Neogloboquadrina_pachyderma_I_NA_NA;	Non-Spinose	Neogloboquadrina	pachyderma	I	Non-Spinose_Neogloboquadrina_pachyderma_I
ISU1350	1	2	NO	-	0	0	2	0	0	0	0	0	0	0	0	0	0	0	0	0	0	0	0	0	0	0	0	0	0	0	0	0	0	0	0	9	Non-Spiral_Galietelia_vivans_NA_NA_NA	Non-Spiral	Galietelia	vivans	NA	NAAB364519_Non-Spiral_Galietelia_vivans_NA_NA_NA;AB364517_Non-Spiral_Galietelia_vivans_NA_NA_NA;AB364518_Non-Spiral_Galietelia_vivans_NA_NA_NA;	-	-	-	-	-
ISU1351	5	169	Yes	R-85_5_169_1	0	0	0	0	12	63	0	0	0	0	0	0	0	0	0	0	0	0	20	27	0	47	0	0	0	0	0	0	0	0	0	1	Microperforates_Globigerinita_glutinata	Microperforates	Globigerinita	glutinata	-	FJ643296_Microperforates_Globigerinita_glutinata_III_NA_NA;KM193199_Microperforates_Globigerinita_glutinata_NA_NA_NA;FJ643277_Microperforates_Globigerinita_glutinata_III_NA_NA;AY453136_Microperforates_Globigerinita_glutinata_III_NA_NA;JQ799900_Microperforates_Globigerinita_glutinata_IV_NA_NA;	Microperforates	Globigerinita	glutinata	III	Microperforates_Globigerinita_glutinata_III
ISU1352	2	4	Yes	R-696_2_4_1	0	0	0	0	0	0	0	0	0	0	0	0	0	0	0	0	0	0	2	0	0	2	0	0	0	0	0	0	0	0	0	1	Microperforates_Globigerinita_glutinata_III_NA_NA	Microperforates	Globigerinita	glutinata	III	NAFJ643296_Microperforates_Globigerinita_glutinata_III_NA_NA;	Microperforates	Globigerinita	glutinata	III	Microperforates_Globigerinita_glutinata_III
ISU1353	4	20	Yes	R-327_4_20_1	0	0	0	0	0	5	0	0	0	0	0	0	0	0	0	0	0	0	8	4	0	3	0	0	0	0	0	0	0	0	0	1	Microperforates_Globigerinita_glutinata	Microperforates	Globigerinita	glutinata	-	JQ799900_Microperforates_Globigerinita_glutinata_IV_NA_NA;FJ643296_Microperforates_Globigerinita_glutinata_III_NA_NA;KM193199_Microperforates_Globigerinita_glutinata_NA_NA_NA;AY453136_Microperforates_Globigerinita_glutinata_III_NA_NA	Microperforates	Globigerinita	glutinata	III	Microperforates_Globigerinita_glutinata_III
ISU1354	3	16	Yes	R-371_3_16_1	0	0	0	0	0	6	0	0	0	0	0	0	0	0	0	0	0	0	0	4	0	6	0	0	0	0	0	0	0	0	0	1	Microperforates_Globigerinita_glutinata_III_NA_NA	Microperforates	Globigerinita	glutinata	III	NAFJ643296_Microperforates_Globigerinita_glutinata_III_NA_NA;	Microperforates	Globigerinita	glutinata	III	Microperforates_Globigerinita_glutinata_III
ISU1355	1	2	NO	-	0	0	0	0	0	0	0	0	0	0	0	0	0	0	0	0	0	0	0	2	0	0	0	0	0	0	0	0	0	0	0	5	Microperforates_Globigerinita_uvula	Microperforates	Globigerinita	uvula	-	FJ643298_Microperforates_Globigerinita_uvula_I_NA_NA;KM193160_Microperforates_Globigerinita_uvula_NA_NA_NA;KM193075_Microperforates_Globigerinita_uvula_NA_NA_NA;KM193070_Microperforates_Globigerinita_uvula_NA_NA_NA;KM193079_Microperforates_Globigerinita_uvula_NA_NA_NA;	-	-	-	-	-
ISU1356	3	32	Yes	R-253_3_32_1	0	0	0	0	0	0	0	0	0	0	0	0	0	0	0	0	0	0	10	11	0	11	0	0	0	0	0	0	0	0	0	1	Microperforates_Globigerinita_glutinata_III_NA_NA	Microperforates	Globigerinita	glutinata	III	NAFJ643283_Microperforates_Globigerinita_glutinata_III_NA_NA;	Microperforates	Globigerinita	glutinata	III	Microperforates_Globigerinita_glutinata_III
ISU1357	1	2	NO	-	0	0	0	0	0	0	0	0	0	0	0	0	0	0	0	0	0	0	0	2	0	0	0	0	0	0	0	0	0	0	0	1	Microperforates_Globigerinita_glutinata	Microperforates	Globigerinita	glutinata	-	JQ799900_Microperforates_Globigerinita_glutinata_IV_NA_NA;FJ643296_Microperforates_Globigerinita_glutinata_III_NA_NA;KM193199_Microperforates_Globigerinita_glutinata_NA_NA_NA;AY453136_Microperforates_Globigerinita_glutinata_III_NA_NA	-	-	-	-	-
ISU1358	3	281	Yes	R-56_3_281_0	90	0	0	0	0	152	0	0	0	0	0	0	0	0	0	0	0	0	0	0	0	0	0	0	0	0	0	0	0	0	39	0	Microperforates_Globigerinita_glutinata	Microperforates	Globigerinita	glutinata	-	KM193151_Microperforates_Globigerinita_glutinata_NA_NA_NA;KM193497_Microperforates_Globigerinita_glutinata_NA_NA_NA;FJ643294_Microperforates_Globigerinita_glutinata_I_NA_NA;	Microperforates	Globigerinita	glutinata	I	Microperforates_Globigerinita_glutinata_I
ISU1359	1	2	NO	-	0	0	0	0	2	0	0	0	0	0	0	0	0	0	0	0	0	0	0	0	0	0	0	0	0	0	0	0	0	0	0	3	Microperforates_Globigerinita_glutinata	Microperforates	Globigerinita	glutinata	-	KM193497_Microperforates_Globigerinita_glutinata_NA_NA_NA;KM193151_Microperforates_Globigerinita_glutinata_NA_NA_NA;FJ643283_Microperforates_Globigerinita_glutinata_III_NA_NA;FJ643294_Microperforates_Globigerinita_glutinata_I_NA_NA	-	-	-	-	-
ISU136	1	3	NO	-	0	0	0	0	0	3	0	0	0	0	0	0	0	0	0	0	0	0	0	0	0	0	0	0	0	0	0	0	0	0	0	1	Microperforates_Globigerinita_uvula	Microperforates	Globigerinita	uvula	-	KM193070_Microperforates_Globigerinita_uvula_NA_NA_NA;FJ643298_Microperforates_Globigerinita_uvula_I_NA_NA	-	-	-	-	-
ISU1360	4	15	Yes	R-382_4_15_1	0	0	0	0	4	3	0	0	0	0	0	0	0	0	0	0	0	0	0	5	0	3	0	0	0	0	0	0	0	0	0	1	Microperforates_Globigerinita_glutinata_III_NA_NA	Microperforates	Globigerinita	glutinata	III	NAFJ643277_Microperforates_Globigerinita_glutinata_III_NA_NA;	Microperforates	Globigerinita	glutinata	III	Microperforates_Globigerinita_glutinata_III
ISU1361	1	6	NO	-	6	0	0	0	0	0	0	0	0	0	0	0	0	0	0	0	0	0	0	0	0	0	0	0	0	0	0	0	0	0	0	1	Microperforates_Globigerinita_uvula	Microperforates	Globigerinita	uvula	-	KM193181_Microperforates_Globigerinita_uvula_NA_NA_NA;KM193691_Microperforates_Globigerinita_uvula_NA_NA_NA;KM193364_Microperforates_Globigerinita_uvula_NA_NA_NA;AF387173_Microperforates_Globigerinita_uvula_II_NA_NA;KM194324_Microperforates_Globigerinita_uvula_NA_NA_NA;	-	-	-	-	-
ISU1362	1	2	NO	-	0	0	2	0	0	0	0	0	0	0	0	0	0	0	0	0	0	0	0	0	0	0	0	0	0	0	0	0	0	0	0	7	Non-Spiral_Galietelia_vivans_NA_NA_NA	Non-Spiral	Galietelia	vivans	NA	NAAB364519_Non-Spiral_Galietelia_vivans_NA_NA_NA;AB364517_Non-Spiral_Galietelia_vivans_NA_NA_NA;AB364518_Non-Spiral_Galietelia_vivans_NA_NA_NA;	-	-	-	-	-
ISU1363	2	5	Yes	R-644_2_5_1	0	0	0	0	0	0	0	0	0	0	0	0	0	0	0	0	0	0	0	3	0	2	0	0	0	0	0	0	0	0	0	1	Microperforates_Candeina_nitida_NA_NA_NA	Microperforates	Candeina	nitida	NA	NAAB263435_Microperforates_Candeina_nitida_NA_NA_NA;	Microperforates	Candeina	nitida	I	Microperforates_Candeina_nitida_I
ISU1364	3	7	Yes	R-542_3_7_1	0	0	0	0	0	2	0	0	0	0	0	0	0	0	0	0	0	0	3	2	0	0	0	0	0	0	0	0	0	0	0	1	Microperforates_Globigerinita_glutinata	Microperforates	Globigerinita	glutinata	-	JQ799900_Microperforates_Globigerinita_glutinata_IV_NA_NA;FJ643296_Microperforates_Globigerinita_glutinata_III_NA_NA;KM193199_Microperforates_Globigerinita_glutinata_NA_NA_NA;AY453136_Microperforates_Globigerinita_glutinata_III_NA_NA	Microperforates	Globigerinita	glutinata	III	Microperforates_Globigerinita_glutinata_III
ISU1365	1	2	NO	-	0	0	0	0	0	0	0	0	0	0	0	0	0	0	0	0	0	0	0	0	0	0	0	0	0	0	0	0	2	0	0	1	Non-Spinose_Neogloboquadrina_pachyderma_IV_NA_NA	Non-Spinose	Neogloboquadrina	pachyderma	IV	NAKM193680_Non-Spinose_Neogloboquadrina_pachyderma_IV_NA_NA;	-	-	-	-	-
ISU1366	3	23	Yes	R-299_3_23_2	0	0	0	0	0	0	0	0	0	7	8	8	0	0	0	0	0	0	0	0	0	0	0	0	0	0	0	0	0	0	0	2	Non-Spinose_Neogloboquadrina_pachyderma_I_NA_NA	Non-Spinose	Neogloboquadrina	pachyderma	I	NAAY305329_Non-Spinose_Neogloboquadrina_pachyderma_I_NA_NA;	Non-Spinose	Neogloboquadrina	pachyderma	I	Non-Spinose_Neogloboquadrina_pachyderma_I
ISU1367	1	2	NO	-	0	0	0	0	0	2	0	0	0	0	0	0	0	0	0	0	0	0	0	0	0	0	0	0	0	0	0	4	0	0	0	3	Microperforates_Globigerinita_uvula	Microperforates	Globigerinita	uvula	-	FJ643298_Microperforates_Globigerinita_uvula_I_NA_NA;KM193079_Microperforates_Globigerinita_uvula_NA_NA_NA;KM193070_Microperforates_Globigerinita_uvula_NA_NA_NA;	-	-	-	-	-
ISU1368	4	14	Yes	R-397_4_14_1	0	0	2	0	0	0	0	0	0	3	6	3	0	0	0	0	0	0	0	0	0	0	0	0	0	0	0	0	0	0	0	1	Non-Spinose_Neogloboquadrina_pachyderma_I_NA_NA	Non-Spinose	Neogloboquadrina	pachyderma	I	NAAY305329_Non-Spinose_Neogloboquadrina_pachyderma_I_NA_NA;	Non-Spinose	Neogloboquadrina	pachyderma	I	Non-Spinose_Neogloboquadrina_pachyderma_I
ISU1369	2	345	Yes	R-49_2_345_5	0	0	0	0	318	27	0	0	0	0	0	0	0	0	0	0	0	0	0	0	0	0	0	0	0	0	0	0	0	0	0	5	Microperforates_Globigerinita_glutinata	Microperforates	Globigerinita	glutinata	-	KM193497_Microperforates_Globigerinita_glutinata_NA_NA_NA;FJ643294_Microperforates_Globigerinita_glutinata_I_NA_NA;FJ643286_Microperforates_Globigerinita_glutinata_I_NA_NA;FJ643283_Microperforates_Globigerinita_glutinata_III_NA_NA;KM193484_Microperforates_Globigerinita_glutinata_NA_NA_NA;KM193151_Microperforates_Globigerinita_glutinata_NA_NA_NA	Microperforates	Globigerinita	glutinata	III	Microperforates_Globigerinita_glutinata_III
ISU137	2	4	Yes	R-677_2_4_2	0	0	0	0	0	0	0	0	0	0	2	0	0	0	0	0	0	0	0	0	0	0	0	0	0	2	0	0	0	0	0	2	Non-Spinose_Neogloboquadrina_pachyderma_I_NA_NA	Non-Spinose	Neogloboquadrina	pachyderma	I	NAAY305329_Non-Spinose_Neogloboquadrina_pachyderma_I_NA_NA;	Non-Spinose	Neogloboquadrina	pachyderma	I	Non-Spinose_Neogloboquadrina_pachyderma_I
ISU1370	1	3	NO	-	0	0	0	0	0	0	0	0	0	0	0	0	0	0	0	0	0	0	0	3	0	0	0	0	0	0	0	0	0	0	0	4	Microperforates_Globigerinita_glutinata	Microperforates	Globigerinita	glutinata	-	KM194025_Microperforates_Globigerinita_glutinata_NA_NA_NA;AB468833_Microperforates_Globigerinita_glutinata_II_NA_NA;FJ643418_Microperforates_Globigerinita_glutinata_NA_NA_NA;AB468827_Microperforates_Globigerinita_glutinata_II_NA_NA;AB468829_Microperforates_Globigerinita_glutinata_II_NA_NA;	-	-	-	-	-
ISU1371	1	2	NO	-	0	0	0	0	0	0	0	0	0	0	0	0	0	0	0	0	0	0	0	2	0	0	0	0	0	0	0	0	0	0	0	4	Microperforates_Globigerinita_glutinata	Microperforates	Globigerinita	glutinata	-	JQ799900_Microperforates_Globigerinita_glutinata_IV_NA_NA;FJ643296_Microperforates_Globigerinita_glutinata_III_NA_NA;FJ643277_Microperforates_Globigerinita_glutinata_III_NA_NA;KM193199_Microperforates_Globigerinita_glutinata_NA_NA_NA;AY453136_Microperforates_Globigerinita_glutinata_III_NA_NA;	-	-	-	-	-
ISU1372	3	9	Yes	R-486_3_9_1	0	0	0	0	0	3	0	0	0	0	0	0	0	0	0	0	0	0	0	2	0	4	0	0	0	0	0	0	0	0	0	1	Microperforates_Globigerinita_glutinata	Microperforates	Globigerinita	glutinata	-	JQ799900_Microperforates_Globigerinita_glutinata_IV_NA_NA;FJ643296_Microperforates_Globigerinita_glutinata_III_NA_NA;KM193199_Microperforates_Globigerinita_glutinata_NA_NA_NA;AY453136_Microperforates_Globigerinita_glutinata_III_NA_NA	Microperforates	Globigerinita	glutinata	III	Microperforates_Globigerinita_glutinata_III
ISU1373	1	6	NO	-	0	0	0	0	0	0	0	0	0	0	0	0	0	0	0	0	0	0	0	0	0	0	0	0	0	0	0	0	6	0	0	1	Non-Spinose_Neogloboquadrina_pachyderma_IV_NA_NA	Non-Spinose	Neogloboquadrina	pachyderma	IV	NAKM193284_Non-Spinose_Neogloboquadrina_pachyderma_IV_NA_NA;	-	-	-	-	-
ISU138	1	2	NO	-	0	0	0	0	0	0	0	0	0	0	0	2	0	0	0	0	0	0	0	0	0	0	0	0	0	0	0	0	0	0	0	2	Non-Spinose_Neogloboquadrina_pachyderma_I_NA_NA	Non-Spinose	Neogloboquadrina	pachyderma	I	NAAY305329_Non-Spinose_Neogloboquadrina_pachyderma_I_NA_NA;	-	-	-	-	-
ISU139	5	46	Yes	R-201_5_46_1	0	0	0	0	2	9	0	0	0	0	0	0	0	0	0	0	0	0	7	9	0	19	0	0	0	0	0	0	0	0	0	1	Microperforates_Globigerinita_glutinata	Microperforates	Globigerinita	glutinata	-	FJ643296_Microperforates_Globigerinita_glutinata_III_NA_NA;KM193199_Microperforates_Globigerinita_glutinata_NA_NA_NA;FJ643277_Microperforates_Globigerinita_glutinata_III_NA_NA;AY453136_Microperforates_Globigerinita_glutinata_III_NA_NA;JQ799900_Microperforates_Globigerinita_glutinata_IV_NA_NA;	Microperforates	Globigerinita	glutinata	III	Microperforates_Globigerinita_glutinata_III
ISU14	1	2	NO	-	0	0	0	0	0	0	0	0	0	0	0	0	0	0	0	0	0	0	0	0	0	0	0	0	0	2	0	0	0	0	0	2	Non-Spinose_Neogloboquadrina_pachyderma_I_NA_NA	Non-Spinose	Neogloboquadrina	pachyderma	I	NAAY305329_Non-Spinose_Neogloboquadrina_pachyderma_I_NA_NA;	-	-	-	-	-
ISU140	4	15	Yes	R-388_4_15_1	0	0	0	0	0	4	0	0	0	0	0	0	0	0	0	0	0	0	4	3	0	4	0	0	0	0	0	0	0	0	0	1	Microperforates_Globigerinita_glutinata	Microperforates	Globigerinita	glutinata	-	JQ799900_Microperforates_Globigerinita_glutinata_IV_NA_NA;FJ643296_Microperforates_Globigerinita_glutinata_III_NA_NA;KM193199_Microperforates_Globigerinita_glutinata_NA_NA_NA;AY453136_Microperforates_Globigerinita_glutinata_III_NA_NA	Microperforates	Globigerinita	glutinata	III	Microperforates_Globigerinita_glutinata_III
ISU141	2	5	Yes	R-606_2_5_1	0	0	0	0	0	0	0	0	0	0	0	0	0	0	0	0	0	0	0	2	0	3	0	0	0	0	0	0	0	0	0	1	Microperforates_Globigerinita_glutinata_II_NA_NA	Microperforates	Globigerinita	glutinata	II	NAAB468826_Microperforates_Globigerinita_glutinata_II_NA_NA;	Microperforates	Globigerinita	uvula	I	Microperforates_Globigerinita_uvula_I
ISU142	3	729	Yes	R-29_3_729_0	0	0	0	0	0	0	0	0	0	0	0	0	0	0	0	0	0	0	241	208	0	280	0	0	0	0	0	0	0	0	0	0	Microperforates_Globigerinita_glutinata_II_NA_NA	Microperforates	Globigerinita	glutinata	II	NAAB468826_Microperforates_Globigerinita_glutinata_II_NA_NA;	Microperforates	Globigerinita	glutinata	II	Microperforates_Globigerinita_glutinata_II
ISU143	3	6	Yes	R-601_3_6_1	0	0	0	0	2	0	0	0	0	0	0	0	0	0	0	0	0	0	0	2	0	2	0	0	0	0	0	0	0	0	0	1	Microperforates_Globigerinita_glutinata	Microperforates	Globigerinita	glutinata	-	FJ643418_Microperforates_Globigerinita_glutinata_NA_NA_NA;AB468829_Microperforates_Globigerinita_glutinata_II_NA_NA	Microperforates	Globigerinita	glutinata	II	Microperforates_Globigerinita_glutinata_II
ISU144	4	14	Yes	R-394_4_14_7	0	0	0	0	6	0	0	0	0	0	0	0	0	0	0	0	0	0	2	4	0	2	0	0	0	0	0	0	0	0	0	7	Microperforates_Globigerinita_uvula	Microperforates	Globigerinita	uvula	-	FJ643298_Microperforates_Globigerinita_uvula_I_NA_NA;KM193160_Microperforates_Globigerinita_uvula_NA_NA_NA;KM193079_Microperforates_Globigerinita_uvula_NA_NA_NA;KM193075_Microperforates_Globigerinita_uvula_NA_NA_NA;KM193070_Microperforates_Globigerinita_uvula_NA_NA_NA;	Microperforates	Globigerinita	uvula	I	Microperforates_Globigerinita_uvula_I
ISU145	1	6	NO	-	0	0	0	0	0	0	0	0	0	0	0	0	0	0	0	0	0	0	0	0	0	0	0	0	0	0	0	0	6	0	0	1	Non-Spinose_Neogloboquadrina_pachyderma_IV_NA_NA	Non-Spinose	Neogloboquadrina	pachyderma	IV	NAKM193680_Non-Spinose_Neogloboquadrina_pachyderma_IV_NA_NA;	-	-	-	-	-
ISU146	1	2	NO	-	0	0	0	0	0	2	0	0	0	0	0	0	0	0	0	0	0	0	0	0	0	0	0	0	0	0	0	0	0	0	0	1	Microperforates_Globigerinita_glutinata	Microperforates	Globigerinita	glutinata	-	AY453136_Microperforates_Globigerinita_glutinata_III_NA_NA;KM193199_Microperforates_Globigerinita_glutinata_NA_NA_NA;JQ799900_Microperforates_Globigerinita_glutinata_IV_NA_NA;	-	-	-	-	-
ISU147	1	3	NO	-	0	0	0	0	3	0	0	0	0	0	0	0	0	0	0	0	0	0	0	0	0	0	0	0	0	0	0	0	0	0	0	1	Spinose_Orbulina_universa	Spinose	Orbulina	universa	-	KM193652_Spinose_Orbulina_universa_III_NA_NA;AB263456_Spinose_Orbulina_universa_III_NA_NA;KM194547_Spinose_Orbulina_universa_NA_NA_NA;	-	-	-	-	-
ISU148	1	4	NO	-	0	0	0	0	0	4	0	0	0	0	0	0	0	0	0	0	0	0	0	0	0	0	0	0	0	0	0	0	0	0	0	7	Microperforates_Globigerinita_uvula	Microperforates	Globigerinita	uvula	-	FJ643298_Microperforates_Globigerinita_uvula_I_NA_NA;KM193079_Microperforates_Globigerinita_uvula_NA_NA_NA;KM193070_Microperforates_Globigerinita_uvula_NA_NA_NA;	-	-	-	-	-
ISU149	1	30	Yes	R-258_1_30_1	0	0	0	0	0	0	0	0	0	0	0	0	0	0	0	0	0	0	0	0	0	0	0	0	0	0	0	0	30	0	0	1	Non-Spinose_Neogloboquadrina_pachyderma_IV_NA_NA	Non-Spinose	Neogloboquadrina	pachyderma	IV	NAKM193680_Non-Spinose_Neogloboquadrina_pachyderma_IV_NA_NA;	Non-Spinose	Neogloboquadrina	pachyderma	IV	Non-Spinose_Neogloboquadrina_pachyderma_IV
ISU15	4	23	Yes	R-306_4_23_1	0	0	0	0	0	6	0	0	0	0	0	0	0	0	0	0	0	0	4	6	0	7	0	0	0	0	0	0	0	0	0	1	Microperforates_Globigerinita_glutinata	Microperforates	Globigerinita	glutinata	-	JQ799900_Microperforates_Globigerinita_glutinata_IV_NA_NA;FJ643296_Microperforates_Globigerinita_glutinata_III_NA_NA;KM193199_Microperforates_Globigerinita_glutinata_NA_NA_NA;AY453136_Microperforates_Globigerinita_glutinata_III_NA_NA	Microperforates	Globigerinita	glutinata	III	Microperforates_Globigerinita_glutinata_III
ISU150	1	3	NO	-	0	0	0	0	0	0	0	0	0	0	0	0	0	0	0	0	0	0	0	0	0	3	0	0	0	0	0	0	0	0	0	3	Microperforates_Globigerinita_glutinata	Microperforates	Globigerinita	glutinata	-	KM193497_Microperforates_Globigerinita_glutinata_NA_NA_NA;FJ643294_Microperforates_Globigerinita_glutinata_I_NA_NA;KM193151_Microperforates_Globigerinita_glutinata_NA_NA_NA;	-	-	-	-	-
ISU151	1	3	NO	-	0	0	0	0	0	0	0	0	0	0	0	0	0	0	0	0	0	0	0	0	0	3	0	0	0	0	0	0	0	0	0	3	Microperforates_Globigerinita_glutinata	Microperforates	Globigerinita	glutinata	-	KM193497_Microperforates_Globigerinita_glutinata_NA_NA_NA;FJ643294_Microperforates_Globigerinita_glutinata_I_NA_NA;KM193151_Microperforates_Globigerinita_glutinata_NA_NA_NA;	-	-	-	-	-
ISU152	1	2	NO	-	2	0	0	0	0	0	0	0	0	0	0	0	0	0	0	0	0	0	0	0	0	0	0	0	0	0	0	0	0	0	0	1	Microperforates_Globigerinita_uvula_NA_NA_NA	Microperforates	Globigerinita	uvula	NA	NAKM193160_Microperforates_Globigerinita_uvula_NA_NA_NA;	-	-	-	-	-
ISU153	3	11	Yes	R-447_3_11_1	0	0	0	0	0	2	0	0	0	0	0	0	0	0	0	0	0	0	6	0	0	3	0	0	0	0	0	0	0	0	0	1	Microperforates_Globigerinita_glutinata	Microperforates	Globigerinita	glutinata	-	JQ799900_Microperforates_Globigerinita_glutinata_IV_NA_NA;FJ643296_Microperforates_Globigerinita_glutinata_III_NA_NA;KM193199_Microperforates_Globigerinita_glutinata_NA_NA_NA;AY453136_Microperforates_Globigerinita_glutinata_III_NA_NA	Microperforates	Globigerinita	glutinata	III	Microperforates_Globigerinita_glutinata_III
ISU154	5	314	Yes	R-52_5_314_1	0	0	0	0	7	47	0	0	0	0	0	0	0	0	0	0	0	0	76	83	0	101	0	0	0	0	0	0	0	0	0	1	Microperforates_Globigerinita_glutinata_III_NA_NA	Microperforates	Globigerinita	glutinata	III	NAFJ643283_Microperforates_Globigerinita_glutinata_III_NA_NA;	Microperforates	Globigerinita	glutinata	III	Microperforates_Globigerinita_glutinata_III
ISU155	1	8	NO	-	0	0	0	0	0	0	0	0	0	0	0	0	0	0	0	0	0	0	0	0	0	0	0	0	0	0	0	0	8	0	0	2	Non-Spinose_Neogloboquadrina_pachyderma_IV_NA_NA	Non-Spinose	Neogloboquadrina	pachyderma	IV	NAKM193680_Non-Spinose_Neogloboquadrina_pachyderma_IV_NA_NA;	-	-	-	-	-
ISU156	1	3	NO	-	0	0	0	0	0	0	0	0	0	0	0	3	0	0	0	0	0	0	0	0	0	0	0	0	0	0	0	0	0	0	0	2	Non-Spinose_Neogloboquadrina_pachyderma_I_NA_NA	Non-Spinose	Neogloboquadrina	pachyderma	I	NAAY305329_Non-Spinose_Neogloboquadrina_pachyderma_I_NA_NA;	-	-	-	-	-
ISU157	1	2	NO	-	0	0	0	0	0	0	0	0	0	0	0	2	0	0	0	0	0	0	0	0	0	0	0	0	0	0	0	0	0	0	0	2	Non-Spinose_Neogloboquadrina_pachyderma_I_NA_NA	Non-Spinose	Neogloboquadrina	pachyderma	I	NAAY305329_Non-Spinose_Neogloboquadrina_pachyderma_I_NA_NA;	-	-	-	-	-
ISU158	1	4	NO	-	0	0	0	0	0	0	0	0	0	0	0	0	0	0	0	0	0	0	0	0	0	4	0	0	0	0	0	0	0	0	0	1	Spinose_Globigerina_bulloides	Spinose	Globigerina	bulloides	-	GQ293072_Spinose_Globigerina_bulloides_I_c_NA;GU060421_Spinose_Globigerina_bulloides_I_e_NA;GQ293070_Spinose_Globigerina_bulloides_I_d_NA;Z83957_Spinose_Globigerina_bulloides_NA_NA_NA	-	-	-	-	-
ISU159	3	588	Yes	R-36_3_588_1	0	0	0	0	0	76	0	0	0	0	0	0	0	0	0	0	0	0	0	397	0	115	0	0	0	0	0	0	0	0	0	1	Microperforates_Globigerinita_glutinata_III_NA_NA	Microperforates	Globigerinita	glutinata	III	NAFJ643277_Microperforates_Globigerinita_glutinata_III_NA_NA;	Microperforates	Globigerinita	glutinata	III	Microperforates_Globigerinita_glutinata_III
ISU16	1	2	NO	-	0	0	0	0	0	2	0	0	0	0	0	0	0	0	0	0	0	0	0	0	0	0	0	0	0	0	0	0	0	0	0	5	Microperforates_Globigerinita_uvula	Microperforates	Globigerinita	uvula	-	FJ643298_Microperforates_Globigerinita_uvula_I_NA_NA;KM193079_Microperforates_Globigerinita_uvula_NA_NA_NA;KM193070_Microperforates_Globigerinita_uvula_NA_NA_NA;	-	-	-	-	-
ISU160	1	3	NO	-	0	0	0	0	0	0	0	0	0	0	0	0	0	0	0	0	0	0	0	3	0	0	0	0	0	0	0	0	0	0	0	5	Microperforates_Globigerinita_glutinata	Microperforates	Globigerinita	glutinata	-	JQ799900_Microperforates_Globigerinita_glutinata_IV_NA_NA;FJ643288_Microperforates_Globigerinita_glutinata_I_NA_NA;KM193539_Microperforates_Globigerinita_glutinata_NA_NA_NA;FJ643296_Microperforates_Globigerinita_glutinata_III_NA_NA;FJ643277_Microperforates_Globigerinita_glutinata_III_NA_NA;KM193303_Microperforates_Globigerinita_glutinata_NA_NA_NA;KM193199_Microperforates_Globigerinita_glutinata_N…	-	-	-	-	-
ISU161	1	2	NO	-	0	0	0	0	0	0	0	0	0	0	0	0	0	0	0	0	0	0	0	0	0	0	0	0	0	0	0	0	2	0	0	1	Non-Spinose_Neogloboquadrina_pachyderma_IV_NA_NA	Non-Spinose	Neogloboquadrina	pachyderma	IV	NAKM193550_Non-Spinose_Neogloboquadrina_pachyderma_IV_NA_NA;KM193530_Non-Spinose_Neogloboquadrina_pachyderma_IV_NA_NA;KM193284_Non-Spinose_Neogloboquadrina_pachyderma_IV_NA_NA;KM193861_Non-Spinose_Neogloboquadrina_pachyderma_IV_NA_NA;KM193614_Non-Spinose_Neogloboquadrina_pachyderma_IV_NA_NA;KM193889_Non-Spinose_Neogloboquadrina_pachyderma_IV_NA_NA;KM193556_Non-Spinose_Neogloboquadrina_pachyderma_…	-	-	-	-	-
ISU162	2	8	Yes	R-506_2_8_7	0	0	0	0	0	2	0	0	0	0	0	0	0	0	0	0	0	0	0	6	0	0	0	0	0	0	0	0	0	0	0	7	Microperforates_Globigerinita_glutinata	Microperforates	Globigerinita	glutinata	-	FJ643286_Microperforates_Globigerinita_glutinata_I_NA_NA;KM193484_Microperforates_Globigerinita_glutinata_NA_NA_NA	Microperforates	Globigerinita	glutinata	III	Microperforates_Globigerinita_glutinata_III
ISU163	2	6	Yes	R-556_2_6_4	0	0	0	0	0	2	0	0	0	0	0	0	0	0	0	0	0	0	0	4	0	0	0	0	0	0	0	0	0	0	0	4	Microperforates_Globigerinita_glutinata	Microperforates	Globigerinita	glutinata	-	FJ643286_Microperforates_Globigerinita_glutinata_I_NA_NA;KM193484_Microperforates_Globigerinita_glutinata_NA_NA_NA	Microperforates	Globigerinita	uvula	I	Microperforates_Globigerinita_uvula_I
ISU164	4	37	Yes	R-232_4_37_6	0	0	0	0	0	5	0	0	0	0	0	0	0	0	0	0	0	0	13	16	0	3	0	0	0	0	0	0	0	0	0	6	Microperforates_Globigerinita_glutinata	Microperforates	Globigerinita	glutinata	-	JQ799900_Microperforates_Globigerinita_glutinata_IV_NA_NA;FJ643288_Microperforates_Globigerinita_glutinata_I_NA_NA;KM193303_Microperforates_Globigerinita_glutinata_NA_NA_NA;FJ643296_Microperforates_Globigerinita_glutinata_III_NA_NA;FJ643277_Microperforates_Globigerinita_glutinata_III_NA_NA;KM193539_Microperforates_Globigerinita_glutinata_NA_NA_NA;KM193199_Microperforates_Globigerinita_glutinata_N…	Microperforates	Globigerinita	glutinata	III	Microperforates_Globigerinita_glutinata_III
ISU165	1	3	NO	-	0	0	0	0	0	0	0	0	0	0	0	0	0	0	0	0	0	0	0	0	0	3	0	0	0	0	0	0	0	0	0	2	Microperforates_Globigerinita_glutinata	Microperforates	Globigerinita	glutinata	-	KM193484_Microperforates_Globigerinita_glutinata_NA_NA_NA;FJ643286_Microperforates_Globigerinita_glutinata_I_NA_NA	-	-	-	-	-
ISU166	2	7	Yes	R-551_2_7_1	0	0	0	0	0	4	0	0	0	0	0	0	0	0	0	0	0	0	0	0	0	3	0	0	0	0	0	0	0	0	0	1	Microperforates_Globigerinita_glutinata	Microperforates	Globigerinita	glutinata	-	JQ799900_Microperforates_Globigerinita_glutinata_IV_NA_NA;FJ643296_Microperforates_Globigerinita_glutinata_III_NA_NA;KM193199_Microperforates_Globigerinita_glutinata_NA_NA_NA;AY453136_Microperforates_Globigerinita_glutinata_III_NA_NA	Microperforates	Globigerinita	glutinata	III	Microperforates_Globigerinita_glutinata_III
ISU167	4	39	Yes	R-227_4_39_7	0	0	0	0	17	11	0	0	0	0	0	0	0	0	0	0	0	0	0	4	0	7	0	0	0	0	0	0	0	0	0	7	Microperforates_Globigerinita_uvula	Microperforates	Globigerinita	uvula	-	FJ643298_Microperforates_Globigerinita_uvula_I_NA_NA;KM193160_Microperforates_Globigerinita_uvula_NA_NA_NA;KM193079_Microperforates_Globigerinita_uvula_NA_NA_NA;KM193075_Microperforates_Globigerinita_uvula_NA_NA_NA;KM193070_Microperforates_Globigerinita_uvula_NA_NA_NA;	Microperforates	Globigerinita	uvula	I	Microperforates_Globigerinita_uvula_I
ISU168	4	11	Yes	R-433_4_11_7	0	0	0	0	0	4	0	0	0	0	0	0	0	0	0	0	0	0	2	3	0	2	0	0	0	0	0	0	0	0	0	7	Microperforates_Globigerinita_uvula	Microperforates	Globigerinita	uvula	-	FJ643298_Microperforates_Globigerinita_uvula_I_NA_NA;KM193079_Microperforates_Globigerinita_uvula_NA_NA_NA;KM193070_Microperforates_Globigerinita_uvula_NA_NA_NA;	Microperforates	Globigerinita	uvula	I	Microperforates_Globigerinita_uvula_I
ISU169	1	2	NO	-	0	0	0	0	0	0	0	0	0	0	0	0	0	0	0	0	0	0	0	0	0	0	0	0	0	0	0	0	2	0	0	1	Non-Spinose_Neogloboquadrina_pachyderma_IV_NA_NA	Non-Spinose	Neogloboquadrina	pachyderma	IV	NAKM193680_Non-Spinose_Neogloboquadrina_pachyderma_IV_NA_NA;	-	-	-	-	-
ISU17	2	11	Yes	R-435_2_11_0	0	0	0	0	0	9	0	0	0	0	0	0	0	0	0	0	0	0	2	0	0	0	0	0	0	0	0	0	0	0	0	0	Non-Spiral_Galietelia_vivans_NA_NA_NA	Non-Spiral	Galietelia	vivans	NA	NAAB364517_Non-Spiral_Galietelia_vivans_NA_NA_NA;AB364518_Non-Spiral_Galietelia_vivans_NA_NA_NA	Non-Spiral	Gallitellia	vivans	I	Non-Spiral_Gallitellia_vivans_I
ISU170	3	8	Yes	R-515_3_8_1	0	0	0	0	0	2	0	0	0	0	0	0	0	0	0	0	0	0	0	2	0	4	0	0	0	0	0	0	0	0	0	1	Microperforates_Globigerinita_glutinata	Microperforates	Globigerinita	glutinata	-	AY453136_Microperforates_Globigerinita_glutinata_III_NA_NA;KM193199_Microperforates_Globigerinita_glutinata_NA_NA_NA;JQ799900_Microperforates_Globigerinita_glutinata_IV_NA_NA;	Microperforates	Globigerinita	glutinata	III	Microperforates_Globigerinita_glutinata_III
ISU171	7	254	Yes	R-60_7_254_2	0	0	0	0	21	76	4	0	0	0	0	0	0	0	0	0	0	0	34	44	0	65	0	0	10	0	0	0	0	0	0	2	Microperforates_Globigerinita_glutinata	Microperforates	Globigerinita	glutinata	-	KM193497_Microperforates_Globigerinita_glutinata_NA_NA_NA;KM193151_Microperforates_Globigerinita_glutinata_NA_NA_NA;FJ643283_Microperforates_Globigerinita_glutinata_III_NA_NA;FJ643294_Microperforates_Globigerinita_glutinata_I_NA_NA	Microperforates	Globigerinita	glutinata	III	Microperforates_Globigerinita_glutinata_III
ISU172	1	2	NO	-	0	0	0	0	0	2	0	0	0	0	0	0	0	0	0	0	0	0	0	0	0	0	0	0	0	0	0	0	0	0	0	2	Microperforates_Globigerinita_uvula	Microperforates	Globigerinita	uvula	-	FJ643298_Microperforates_Globigerinita_uvula_I_NA_NA;KM193079_Microperforates_Globigerinita_uvula_NA_NA_NA;KM193070_Microperforates_Globigerinita_uvula_NA_NA_NA;	-	-	-	-	-
ISU173	2	138	Yes	R-99_2_138_0	0	0	0	0	0	90	0	0	0	0	0	0	0	0	0	0	0	0	0	48	0	0	0	0	0	0	0	0	0	0	0	0	Non-Spiral_Galietelia_vivans_NA_NA_NA	Non-Spiral	Galietelia	vivans	NA	NAAB364517_Non-Spiral_Galietelia_vivans_NA_NA_NA;AB364518_Non-Spiral_Galietelia_vivans_NA_NA_NA	Non-Spiral	Gallitellia	vivans	I	Non-Spiral_Gallitellia_vivans_I
ISU174	3	9	Yes	R-487_3_9_4	0	0	0	0	0	4	0	0	0	0	0	0	0	0	0	0	0	0	0	3	0	2	0	0	0	0	0	0	0	0	0	4	Microperforates_Globigerinita_glutinata	Microperforates	Globigerinita	glutinata	-	FJ643286_Microperforates_Globigerinita_glutinata_I_NA_NA;KM193484_Microperforates_Globigerinita_glutinata_NA_NA_NA	Microperforates	Globigerinita	glutinata	I	Microperforates_Globigerinita_glutinata_I
ISU175	2	216	Yes	R-72_2_216_0	61	0	0	0	0	0	0	0	0	0	0	0	0	0	0	0	0	155	0	0	0	0	0	0	0	0	0	0	0	0	0	0	Microperforates_Globigerinita_uvula_NA_NA_NA	Microperforates	Globigerinita	uvula	NA	NAKM193160_Microperforates_Globigerinita_uvula_NA_NA_NA;	Microperforates	Globigerinita	uvula	II	Microperforates_Globigerinita_uvula_II
ISU176	1	2	NO	-	0	0	0	0	0	2	0	0	0	0	0	0	0	0	0	0	0	0	0	0	0	0	0	0	0	0	0	0	0	0	0	5	Microperforates_Globigerinita_uvula	Microperforates	Globigerinita	uvula	-	FJ643298_Microperforates_Globigerinita_uvula_I_NA_NA;KM193079_Microperforates_Globigerinita_uvula_NA_NA_NA;KM193070_Microperforates_Globigerinita_uvula_NA_NA_NA;	-	-	-	-	-
ISU177	2	43	Yes	R-212_2_43_1	0	0	0	0	0	40	0	0	0	0	0	0	0	0	0	0	0	0	3	0	0	0	0	0	0	0	0	0	0	0	0	1	Microperforates_Globigerinita_glutinata	Microperforates	Globigerinita	glutinata	-	JQ799900_Microperforates_Globigerinita_glutinata_IV_NA_NA;FJ643296_Microperforates_Globigerinita_glutinata_III_NA_NA;KM193199_Microperforates_Globigerinita_glutinata_NA_NA_NA;AY453136_Microperforates_Globigerinita_glutinata_III_NA_NA	Microperforates	Globigerinita	glutinata	III	Microperforates_Globigerinita_glutinata_III
ISU178	1	2	NO	-	0	0	0	0	0	2	0	0	0	0	0	0	0	0	0	0	0	0	0	0	0	0	0	0	0	0	0	0	0	0	0	1	Spinose_Globigerina_bulloides	Spinose	Globigerina	bulloides	-	Z83957_Spinose_Globigerina_bulloides_NA_NA_NA;GQ293072_Spinose_Globigerina_bulloides_I_c_NA;GQ293070_Spinose_Globigerina_bulloides_I_d_NA;GU060421_Spinose_Globigerina_bulloides_I_e_NA	-	-	-	-	-
ISU179	1	3	NO	-	0	0	0	0	0	0	0	0	0	0	0	0	0	0	0	0	0	0	0	3	0	0	0	0	0	0	0	0	0	0	0	1	Microperforates_Candeina_nitida_NA_NA_NA	Microperforates	Candeina	nitida	NA	NAAB263435_Microperforates_Candeina_nitida_NA_NA_NA;	-	-	-	-	-
ISU18	1	5	NO	-	0	0	0	0	0	0	0	0	0	0	0	0	0	0	0	0	0	0	0	5	0	0	0	0	0	0	0	0	0	0	0	2	Microperforates_Globigerinita_glutinata	Microperforates	Globigerinita	glutinata	-	JQ799900_Microperforates_Globigerinita_glutinata_IV_NA_NA;FJ643296_Microperforates_Globigerinita_glutinata_III_NA_NA;KM193199_Microperforates_Globigerinita_glutinata_NA_NA_NA;AY453136_Microperforates_Globigerinita_glutinata_III_NA_NA	-	-	-	-	-
ISU180	3	7	Yes	R-529_3_7_2	0	0	0	0	0	3	0	0	0	0	0	0	0	0	0	0	0	0	0	2	0	2	0	0	0	0	0	0	0	0	0	2	Microperforates_Globigerinita_glutinata	Microperforates	Globigerinita	glutinata	-	FJ643286_Microperforates_Globigerinita_glutinata_I_NA_NA;KM193484_Microperforates_Globigerinita_glutinata_NA_NA_NA	Microperforates	Globigerinita	glutinata	I	Microperforates_Globigerinita_glutinata_I
ISU181	1	2	NO	-	0	0	0	0	0	2	0	0	0	0	0	0	0	0	0	0	0	0	0	0	0	0	0	0	0	0	0	0	0	0	0	7	Microperforates_Globigerinita_uvula	Microperforates	Globigerinita	uvula	-	FJ643298_Microperforates_Globigerinita_uvula_I_NA_NA;KM193079_Microperforates_Globigerinita_uvula_NA_NA_NA;KM193070_Microperforates_Globigerinita_uvula_NA_NA_NA;	-	-	-	-	-
ISU182	1	2	NO	-	0	0	0	0	0	0	0	0	0	0	0	0	0	0	0	0	0	0	0	0	0	2	0	0	0	0	0	0	0	0	0	2	Microperforates_Globigerinita_glutinata	Microperforates	Globigerinita	glutinata	-	KM193484_Microperforates_Globigerinita_glutinata_NA_NA_NA;FJ643286_Microperforates_Globigerinita_glutinata_I_NA_NA	-	-	-	-	-
ISU183	1	3	NO	-	0	0	0	0	0	0	0	0	0	0	0	0	0	0	0	0	0	0	0	0	0	0	0	0	0	0	0	0	3	0	0	1	Non-Spinose_Neogloboquadrina_pachyderma_IV_NA_NA	Non-Spinose	Neogloboquadrina	pachyderma	IV	NAKM193680_Non-Spinose_Neogloboquadrina_pachyderma_IV_NA_NA;	-	-	-	-	-
ISU184	1	2	NO	-	0	0	0	0	0	0	0	0	0	0	0	0	0	0	0	0	0	0	0	0	0	0	0	0	0	0	0	0	2	0	0	1	Non-Spinose_Neogloboquadrina_pachyderma_IV_NA_NA	Non-Spinose	Neogloboquadrina	pachyderma	IV	NAKM193680_Non-Spinose_Neogloboquadrina_pachyderma_IV_NA_NA;	-	-	-	-	-
ISU185	1	2	NO	-	0	0	0	0	2	0	0	0	0	0	0	0	0	0	0	0	0	0	0	0	0	0	0	0	0	0	0	0	0	0	0	7	Microperforates_Globigerinita_uvula	Microperforates	Globigerinita	uvula	-	FJ643298_Microperforates_Globigerinita_uvula_I_NA_NA;KM193160_Microperforates_Globigerinita_uvula_NA_NA_NA;KM193079_Microperforates_Globigerinita_uvula_NA_NA_NA;KM193075_Microperforates_Globigerinita_uvula_NA_NA_NA;KM193070_Microperforates_Globigerinita_uvula_NA_NA_NA;	-	-	-	-	-
ISU186	1	2	NO	-	0	0	0	0	0	0	0	0	0	0	0	0	0	0	0	0	0	0	2	0	0	0	0	0	0	0	0	0	0	0	0	2	Microperforates_Globigerinita_glutinata	Microperforates	Globigerinita	glutinata	-	FJ643286_Microperforates_Globigerinita_glutinata_I_NA_NA;KM193484_Microperforates_Globigerinita_glutinata_NA_NA_NA	-	-	-	-	-
ISU187	1	2	NO	-	0	0	0	0	0	2	0	0	0	0	0	0	0	0	0	0	0	0	0	0	0	0	0	0	0	0	0	0	0	0	0	3	Microperforates_Globigerinita_glutinata	Microperforates	Globigerinita	glutinata	-	FJ643294_Microperforates_Globigerinita_glutinata_I_NA_NA;KM193497_Microperforates_Globigerinita_glutinata_NA_NA_NA;FJ643283_Microperforates_Globigerinita_glutinata_III_NA_NA;KM193151_Microperforates_Globigerinita_glutinata_NA_NA_NA	-	-	-	-	-
ISU188	6	187	Yes	R-82_6_187_1	0	0	0	3	11	40	0	0	0	0	0	0	0	0	0	0	0	0	35	47	0	51	0	0	0	0	0	0	0	0	0	1	Microperforates_Globigerinita_glutinata_III_NA_NA	Microperforates	Globigerinita	glutinata	III	NAFJ643283_Microperforates_Globigerinita_glutinata_III_NA_NA;	Microperforates	Globigerinita	glutinata	III	Microperforates_Globigerinita_glutinata_III
ISU189	5	30	Yes	R-256_5_30_5	0	0	0	0	2	3	0	0	0	0	0	0	0	0	0	0	0	0	5	10	0	10	0	0	0	0	0	0	0	0	0	5	Microperforates_Globigerinita_uvula	Microperforates	Globigerinita	uvula	-	FJ643298_Microperforates_Globigerinita_uvula_I_NA_NA;KM193160_Microperforates_Globigerinita_uvula_NA_NA_NA;KM193079_Microperforates_Globigerinita_uvula_NA_NA_NA;KM193075_Microperforates_Globigerinita_uvula_NA_NA_NA;KM193070_Microperforates_Globigerinita_uvula_NA_NA_NA;	Microperforates	Globigerinita	uvula	I	Microperforates_Globigerinita_uvula_I
ISU19	2	6	Yes	R-568_2_6_7	0	0	0	0	0	3	0	0	0	0	0	0	0	0	0	0	0	0	0	3	0	0	0	0	0	0	0	0	0	0	0	7	Microperforates_Globigerinita_uvula	Microperforates	Globigerinita	uvula	-	FJ643298_Microperforates_Globigerinita_uvula_I_NA_NA;KM193079_Microperforates_Globigerinita_uvula_NA_NA_NA;KM193070_Microperforates_Globigerinita_uvula_NA_NA_NA;	Microperforates	Globigerinita	uvula	I	Microperforates_Globigerinita_uvula_I
ISU190	4	9	Yes	R-484_4_9_1	0	0	0	2	2	0	0	0	0	0	0	0	0	0	0	0	0	0	0	3	0	2	0	0	0	0	0	0	0	0	0	1	Microperforates_Candeina_nitida_NA_NA_NA	Microperforates	Candeina	nitida	NA	NAAB263435_Microperforates_Candeina_nitida_NA_NA_NA;AB468836_Microperforates_Candeina_nitida_NA_NA_NA;AB468837_Microperforates_Candeina_nitida_NA_NA_NA;	Microperforates	Candeina	nitida	I	Microperforates_Candeina_nitida_I
ISU191	1	2	NO	-	0	0	0	0	0	2	0	0	0	0	0	0	0	0	0	0	0	0	0	0	0	0	0	0	0	0	0	0	0	0	0	1	Microperforates_Globigerinita_glutinata_III_NA_NA	Microperforates	Globigerinita	glutinata	III	NAFJ643277_Microperforates_Globigerinita_glutinata_III_NA_NA;	-	-	-	-	-
ISU192	4	27	Yes	R-278_4_27_1	0	0	0	0	0	0	0	0	0	9	7	2	0	0	0	0	0	0	0	0	0	0	0	0	0	9	0	0	0	0	0	1	Non-Spinose_Neogloboquadrina_pachyderma_I_NA_NA	Non-Spinose	Neogloboquadrina	pachyderma	I	NAAY305329_Non-Spinose_Neogloboquadrina_pachyderma_I_NA_NA;	Non-Spinose	Neogloboquadrina	pachyderma	U3	Non-Spinose_Neogloboquadrina_pachyderma_U3
ISU193	3	8	Yes	R-491_3_8_5	0	0	0	0	0	0	0	0	0	0	0	0	0	0	0	0	0	0	2	4	0	2	0	0	0	0	0	0	0	0	0	5	Microperforates_Globigerinita_uvula	Microperforates	Globigerinita	uvula	-	FJ643298_Microperforates_Globigerinita_uvula_I_NA_NA;KM193070_Microperforates_Globigerinita_uvula_NA_NA_NA;KM193079_Microperforates_Globigerinita_uvula_NA_NA_NA;	Microperforates	Globigerinita	uvula	I	Microperforates_Globigerinita_uvula_I
ISU194	5	98	Yes	R-124_5_98_1	0	0	0	0	3	8	0	0	0	0	0	0	0	0	0	0	0	0	24	36	0	27	0	0	0	0	0	0	0	0	0	1	Microperforates_Globigerinita_glutinata_III_NA_NA	Microperforates	Globigerinita	glutinata	III	NAFJ643283_Microperforates_Globigerinita_glutinata_III_NA_NA;	Microperforates	Globigerinita	glutinata	III	Microperforates_Globigerinita_glutinata_III
ISU195	3	14	Yes	R-393_3_14_5	0	0	0	0	0	7	0	0	0	0	0	0	0	0	0	0	0	0	0	2	0	5	0	0	0	0	0	0	0	0	0	5	Microperforates_Globigerinita_uvula	Microperforates	Globigerinita	uvula	-	FJ643298_Microperforates_Globigerinita_uvula_I_NA_NA;KM193079_Microperforates_Globigerinita_uvula_NA_NA_NA;KM193070_Microperforates_Globigerinita_uvula_NA_NA_NA;	Microperforates	Globigerinita	uvula	I	Microperforates_Globigerinita_uvula_I
ISU196	4	15	Yes	R-385_4_15_1	0	0	0	0	3	3	0	0	0	0	0	0	0	0	0	0	0	0	5	0	0	4	0	0	0	0	0	0	0	0	0	1	Microperforates_Globigerinita_glutinata	Microperforates	Globigerinita	glutinata	-	FJ643296_Microperforates_Globigerinita_glutinata_III_NA_NA;KM193199_Microperforates_Globigerinita_glutinata_NA_NA_NA;FJ643277_Microperforates_Globigerinita_glutinata_III_NA_NA;AY453136_Microperforates_Globigerinita_glutinata_III_NA_NA;JQ799900_Microperforates_Globigerinita_glutinata_IV_NA_NA;	Microperforates	Globigerinita	glutinata	III	Microperforates_Globigerinita_glutinata_III
ISU197	2	8	Yes	R-496_2_8_5	0	0	0	0	0	4	0	0	0	0	0	0	0	0	0	0	0	0	0	4	0	0	0	0	0	0	0	0	0	0	0	5	Microperforates_Globigerinita_uvula	Microperforates	Globigerinita	uvula	-	FJ643298_Microperforates_Globigerinita_uvula_I_NA_NA;KM193079_Microperforates_Globigerinita_uvula_NA_NA_NA;KM193070_Microperforates_Globigerinita_uvula_NA_NA_NA;	Microperforates	Globigerinita	uvula	I	Microperforates_Globigerinita_uvula_I
ISU198	1	2	NO	-	0	0	0	0	0	0	0	0	0	0	0	0	0	0	0	0	0	0	0	2	0	0	0	0	0	0	0	0	0	0	0	6	Microperforates_Candeina_nitida_NA_NA_NA	Microperforates	Candeina	nitida	NA	NAAB468837_Microperforates_Candeina_nitida_NA_NA_NA;AB468836_Microperforates_Candeina_nitida_NA_NA_NA;KJ633212_Microperforates_Candeina_nitida_NA_NA_NA;AB263435_Microperforates_Candeina_nitida_NA_NA_NA	-	-	-	-	-
ISU199	2	228	Yes	R-66_2_228_1	9	0	0	0	0	0	0	0	0	0	0	0	0	0	0	0	0	0	0	0	0	0	0	0	0	0	0	0	0	0	219	1	Microperforates_Globigerinita_uvula_NA_NA_NA	Microperforates	Globigerinita	uvula	NA	NAKM193324_Microperforates_Globigerinita_uvula_NA_NA_NA;	Microperforates	Globigerinita	uvula	II	Microperforates_Globigerinita_uvula_II
ISU2	1	3	NO	-	0	0	0	0	0	0	0	0	0	0	0	0	0	0	0	0	0	0	0	0	0	3	0	0	0	0	0	0	0	0	0	1	Spinose_Globigerina_bulloides	Spinose	Globigerina	bulloides	-	GQ293072_Spinose_Globigerina_bulloides_I_c_NA;GU060421_Spinose_Globigerina_bulloides_I_e_NA;GQ293070_Spinose_Globigerina_bulloides_I_d_NA;Z83957_Spinose_Globigerina_bulloides_NA_NA_NA	-	-	-	-	-
ISU20	2	8	Yes	R-514_2_8_1	0	0	0	0	0	5	0	0	0	0	0	0	0	0	0	0	0	0	0	3	0	0	0	0	0	0	0	0	0	0	0	1	Microperforates_Globigerinita_glutinata	Microperforates	Globigerinita	glutinata	-	JQ799900_Microperforates_Globigerinita_glutinata_IV_NA_NA;FJ643296_Microperforates_Globigerinita_glutinata_III_NA_NA;KM193199_Microperforates_Globigerinita_glutinata_NA_NA_NA;AY453136_Microperforates_Globigerinita_glutinata_III_NA_NA	Microperforates	Globigerinita	glutinata	III	Microperforates_Globigerinita_glutinata_III
ISU200	1	3	NO	-	0	0	0	0	0	0	0	0	0	0	0	0	0	0	0	0	0	0	0	0	0	3	0	0	0	0	0	0	0	0	0	2	Microperforates_Globigerinita_glutinata	Microperforates	Globigerinita	glutinata	-	KM193484_Microperforates_Globigerinita_glutinata_NA_NA_NA;FJ643286_Microperforates_Globigerinita_glutinata_I_NA_NA	-	-	-	-	-
ISU201	2	4	Yes	R-685_2_4_1	0	0	0	0	0	2	0	0	0	0	0	0	0	0	0	0	0	0	2	0	0	0	0	0	0	0	0	0	0	0	0	1	Microperforates_Globigerinita_glutinata	Microperforates	Globigerinita	glutinata	-	JQ799900_Microperforates_Globigerinita_glutinata_IV_NA_NA;FJ643296_Microperforates_Globigerinita_glutinata_III_NA_NA;KM193199_Microperforates_Globigerinita_glutinata_NA_NA_NA;AY453136_Microperforates_Globigerinita_glutinata_III_NA_NA	Microperforates	Globigerinita	glutinata	III	Microperforates_Globigerinita_glutinata_III
ISU202	4	25	Yes	R-290_4_25_1	0	0	0	0	0	4	0	0	0	0	0	0	0	0	0	0	0	0	2	5	0	14	0	0	0	0	0	0	0	0	0	1	Microperforates_Globigerinita_glutinata	Microperforates	Globigerinita	glutinata	-	JQ799900_Microperforates_Globigerinita_glutinata_IV_NA_NA;FJ643296_Microperforates_Globigerinita_glutinata_III_NA_NA;KM193199_Microperforates_Globigerinita_glutinata_NA_NA_NA;AY453136_Microperforates_Globigerinita_glutinata_III_NA_NA	Microperforates	Globigerinita	glutinata	III	Microperforates_Globigerinita_glutinata_III
ISU203	1	2	NO	-	0	0	0	0	0	0	0	0	0	0	0	0	0	0	0	0	0	0	0	0	0	2	0	0	0	0	0	0	0	0	0	7	Microperforates_Globigerinita_uvula	Microperforates	Globigerinita	uvula	-	KM193079_Microperforates_Globigerinita_uvula_NA_NA_NA;KM193160_Microperforates_Globigerinita_uvula_NA_NA_NA;FJ643298_Microperforates_Globigerinita_uvula_I_NA_NA;KM193075_Microperforates_Globigerinita_uvula_NA_NA_NA;KM193070_Microperforates_Globigerinita_uvula_NA_NA_NA;	-	-	-	-	-
ISU204	1	2	NO	-	0	0	0	0	0	0	0	0	0	0	0	0	0	0	0	0	0	0	2	0	0	0	0	0	0	0	0	0	0	0	0	5	Microperforates_Globigerinita_glutinata	Microperforates	Globigerinita	glutinata	-	JQ799900_Microperforates_Globigerinita_glutinata_IV_NA_NA;FJ643288_Microperforates_Globigerinita_glutinata_I_NA_NA;KM193539_Microperforates_Globigerinita_glutinata_NA_NA_NA;KM193303_Microperforates_Globigerinita_glutinata_NA_NA_NA;FJ643296_Microperforates_Globigerinita_glutinata_III_NA_NA;FJ643277_Microperforates_Globigerinita_glutinata_III_NA_NA;KM193199_Microperforates_Globigerinita_glutinata_N…	-	-	-	-	-
ISU205	1	3	NO	-	0	0	0	0	0	0	0	0	0	0	0	0	0	0	0	0	0	0	0	0	0	0	0	0	0	0	0	0	3	0	0	1	Non-Spinose_Neogloboquadrina_pachyderma_IV_NA_NA	Non-Spinose	Neogloboquadrina	pachyderma	IV	NAKM193550_Non-Spinose_Neogloboquadrina_pachyderma_IV_NA_NA;KM193530_Non-Spinose_Neogloboquadrina_pachyderma_IV_NA_NA;KM193284_Non-Spinose_Neogloboquadrina_pachyderma_IV_NA_NA;KM193861_Non-Spinose_Neogloboquadrina_pachyderma_IV_NA_NA;KM193614_Non-Spinose_Neogloboquadrina_pachyderma_IV_NA_NA;KM193889_Non-Spinose_Neogloboquadrina_pachyderma_IV_NA_NA;KM193556_Non-Spinose_Neogloboquadrina_pachyderma_…	-	-	-	-	-
ISU206	2	149	Yes	R-95_2_149_6	0	0	0	0	0	43	0	0	0	0	0	0	0	0	0	0	0	0	106	0	0	0	0	0	0	0	0	0	0	0	0	6	Microperforates_Candeina_nitida_NA_NA_NA	Microperforates	Candeina	nitida	NA	NAAB468837_Microperforates_Candeina_nitida_NA_NA_NA;KJ633212_Microperforates_Candeina_nitida_NA_NA_NA;AB468836_Microperforates_Candeina_nitida_NA_NA_NA;AB263435_Microperforates_Candeina_nitida_NA_NA_NA	Microperforates	Candeina	nitida	I	Microperforates_Candeina_nitida_I
ISU207	3	12	Yes	R-428_3_12_1	0	0	0	0	0	5	0	0	0	0	0	0	0	0	0	0	0	0	0	4	0	3	0	0	0	0	0	0	0	0	0	1	Microperforates_Globigerinita_glutinata_III_NA_NA	Microperforates	Globigerinita	glutinata	III	NAFJ643283_Microperforates_Globigerinita_glutinata_III_NA_NA;	Microperforates	Globigerinita	glutinata	III	Microperforates_Globigerinita_glutinata_III
ISU208	1	2	NO	-	0	0	0	0	0	2	0	0	0	0	0	0	0	0	0	0	0	0	0	0	0	0	0	0	0	0	0	0	0	0	0	2	Microperforates_Globigerinita_glutinata	Microperforates	Globigerinita	glutinata	-	FJ643286_Microperforates_Globigerinita_glutinata_I_NA_NA;KM193484_Microperforates_Globigerinita_glutinata_NA_NA_NA	-	-	-	-	-
ISU209	1	4	NO	-	0	0	0	0	0	0	0	0	0	0	0	0	0	0	0	0	0	0	0	0	0	4	0	0	0	0	0	0	0	0	0	2	Microperforates_Globigerinita_glutinata	Microperforates	Globigerinita	glutinata	-	KM193484_Microperforates_Globigerinita_glutinata_NA_NA_NA;FJ643286_Microperforates_Globigerinita_glutinata_I_NA_NA	-	-	-	-	-
ISU21	4	27	Yes	R-283_4_27_1	0	0	0	0	0	6	0	0	0	0	0	0	0	0	0	0	0	0	2	11	0	8	0	0	0	0	0	0	0	0	0	1	Microperforates_Globigerinita_glutinata	Microperforates	Globigerinita	glutinata	-	JQ799900_Microperforates_Globigerinita_glutinata_IV_NA_NA;FJ643296_Microperforates_Globigerinita_glutinata_III_NA_NA;KM193199_Microperforates_Globigerinita_glutinata_NA_NA_NA;AY453136_Microperforates_Globigerinita_glutinata_III_NA_NA	Microperforates	Globigerinita	glutinata	III	Microperforates_Globigerinita_glutinata_III
ISU210	1	2	NO	-	0	0	0	0	0	0	0	0	0	0	0	0	0	0	0	0	0	0	0	0	0	2	0	0	0	0	0	0	0	0	0	10	Microperforates_Globigerinita_glutinata	Microperforates	Globigerinita	glutinata	-	FJ643294_Microperforates_Globigerinita_glutinata_I_NA_NA;KM193151_Microperforates_Globigerinita_glutinata_NA_NA_NA;FJ643286_Microperforates_Globigerinita_glutinata_I_NA_NA;KM193497_Microperforates_Globigerinita_glutinata_NA_NA_NA;FJ643283_Microperforates_Globigerinita_glutinata_III_NA_NA;KM193484_Microperforates_Globigerinita_glutinata_NA_NA_NA	-	-	-	-	-
ISU211	2	4	Yes	R-648_2_4_5	0	0	0	0	0	0	0	0	0	0	0	0	0	0	0	0	0	0	2	2	0	0	0	0	0	0	0	0	0	0	0	5	Microperforates_Globigerinita_glutinata	Microperforates	Globigerinita	glutinata	-	JQ799900_Microperforates_Globigerinita_glutinata_IV_NA_NA;FJ643288_Microperforates_Globigerinita_glutinata_I_NA_NA;KM193539_Microperforates_Globigerinita_glutinata_NA_NA_NA;KM193303_Microperforates_Globigerinita_glutinata_NA_NA_NA;FJ643296_Microperforates_Globigerinita_glutinata_III_NA_NA;FJ643277_Microperforates_Globigerinita_glutinata_III_NA_NA;KM193199_Microperforates_Globigerinita_glutinata_N…	Microperforates	Globigerinita	uvula	I	Microperforates_Globigerinita_uvula_I
ISU212	2	5	Yes	R-617_2_5_4	3	0	0	0	0	0	0	0	0	0	0	0	0	0	0	0	0	0	0	0	0	0	0	0	0	0	0	0	0	0	2	4	Microperforates_Globigerinita_uvula	Microperforates	Globigerinita	uvula	-	KM193181_Microperforates_Globigerinita_uvula_NA_NA_NA;KM193691_Microperforates_Globigerinita_uvula_NA_NA_NA;KM193364_Microperforates_Globigerinita_uvula_NA_NA_NA;KM193357_Microperforates_Globigerinita_uvula_NA_NA_NA;AF387173_Microperforates_Globigerinita_uvula_II_NA_NA;KM194324_Microperforates_Globigerinita_uvula_NA_NA_NA;KM193324_Microperforates_Globigerinita_uvula_NA_NA_NA;	Microperforates	Globigerinita	uvula	II	Microperforates_Globigerinita_uvula_II
ISU213	4	45	Yes	R-207_4_45_1	0	0	0	0	0	15	0	0	0	0	0	0	0	0	0	0	0	0	7	10	0	13	0	0	0	0	0	0	0	0	0	1	Microperforates_Globigerinita_glutinata_III_NA_NA	Microperforates	Globigerinita	glutinata	III	NAFJ643283_Microperforates_Globigerinita_glutinata_III_NA_NA;	Microperforates	Globigerinita	glutinata	III	Microperforates_Globigerinita_glutinata_III
ISU214	4	15	Yes	R-384_4_15_1	0	0	0	0	0	2	0	0	0	0	0	0	0	0	0	0	0	0	2	7	0	4	0	0	0	0	0	0	0	0	0	1	Microperforates_Globigerinita_glutinata	Microperforates	Globigerinita	glutinata	-	JQ799900_Microperforates_Globigerinita_glutinata_IV_NA_NA;FJ643296_Microperforates_Globigerinita_glutinata_III_NA_NA;KM193199_Microperforates_Globigerinita_glutinata_NA_NA_NA;AY453136_Microperforates_Globigerinita_glutinata_III_NA_NA	Microperforates	Globigerinita	glutinata	III	Microperforates_Globigerinita_glutinata_III
ISU215	5	50	Yes	R-184_5_50_1	0	0	0	0	3	20	0	0	0	0	0	0	0	0	0	0	0	0	11	8	0	8	0	0	0	0	0	0	0	0	0	1	Microperforates_Globigerinita_glutinata_III_NA_NA	Microperforates	Globigerinita	glutinata	III	NAFJ643283_Microperforates_Globigerinita_glutinata_III_NA_NA;	Microperforates	Globigerinita	glutinata	III	Microperforates_Globigerinita_glutinata_III
ISU216	1	2	NO	-	0	0	0	0	0	0	0	0	0	0	0	0	0	0	0	0	0	0	0	2	0	0	0	0	0	0	0	0	0	0	0	2	Microperforates_Globigerinita_glutinata	Microperforates	Globigerinita	glutinata	-	JQ799900_Microperforates_Globigerinita_glutinata_IV_NA_NA;FJ643296_Microperforates_Globigerinita_glutinata_III_NA_NA;FJ643277_Microperforates_Globigerinita_glutinata_III_NA_NA;KM193199_Microperforates_Globigerinita_glutinata_NA_NA_NA;AY453136_Microperforates_Globigerinita_glutinata_III_NA_NA;	-	-	-	-	-
ISU217	1	2	NO	-	0	0	0	0	0	0	0	0	0	0	0	0	0	0	0	0	0	0	0	0	0	2	0	0	0	0	0	0	0	0	0	2	Microperforates_Globigerinita_glutinata	Microperforates	Globigerinita	glutinata	-	FJ643296_Microperforates_Globigerinita_glutinata_III_NA_NA;JQ799900_Microperforates_Globigerinita_glutinata_IV_NA_NA;KM193199_Microperforates_Globigerinita_glutinata_NA_NA_NA;AY453136_Microperforates_Globigerinita_glutinata_III_NA_NA	-	-	-	-	-
ISU218	2	4	Yes	R-653_2_4_3	0	0	0	0	0	2	0	0	0	0	0	0	0	0	0	0	0	0	0	2	0	0	0	0	0	0	0	0	0	0	0	3	Microperforates_Globigerinita_glutinata	Microperforates	Globigerinita	glutinata	-	FJ643294_Microperforates_Globigerinita_glutinata_I_NA_NA;KM193497_Microperforates_Globigerinita_glutinata_NA_NA_NA;FJ643283_Microperforates_Globigerinita_glutinata_III_NA_NA;KM193151_Microperforates_Globigerinita_glutinata_NA_NA_NA	Microperforates	Globigerinita	uvula	I	Microperforates_Globigerinita_uvula_I
ISU219	1	2	NO	-	0	0	0	0	0	0	0	0	0	0	0	0	0	0	0	0	0	0	0	2	0	0	0	0	0	0	0	0	0	0	0	2	Microperforates_Globigerinita_glutinata_III_NA_NA	Microperforates	Globigerinita	glutinata	III	NAFJ643283_Microperforates_Globigerinita_glutinata_III_NA_NA;	-	-	-	-	-
ISU22	1	3	NO	-	0	0	0	0	0	0	0	0	0	0	0	0	0	0	0	0	0	0	0	0	0	0	0	0	0	0	0	0	3	0	0	1	Non-Spinose_Neogloboquadrina_pachyderma_IV_NA_NA	Non-Spinose	Neogloboquadrina	pachyderma	IV	NAKM193490_Non-Spinose_Neogloboquadrina_pachyderma_IV_NA_NA;KM193530_Non-Spinose_Neogloboquadrina_pachyderma_IV_NA_NA;KM193551_Non-Spinose_Neogloboquadrina_pachyderma_IV_NA_NA;KM193565_Non-Spinose_Neogloboquadrina_pachyderma_IV_NA_NA;KM193614_Non-Spinose_Neogloboquadrina_pachyderma_IV_NA_NA;KM193861_Non-Spinose_Neogloboquadrina_pachyderma_IV_NA_NA;KM193569_Non-Spinose_Neogloboquadrina_pachyderma_…	-	-	-	-	-
ISU220	1	2	NO	-	0	0	0	0	0	2	0	0	0	0	0	0	0	0	0	0	0	0	0	0	0	0	0	0	0	0	0	0	0	0	0	4	Microperforates_Globigerinita_glutinata	Microperforates	Globigerinita	glutinata	-	FJ643286_Microperforates_Globigerinita_glutinata_I_NA_NA;KM193484_Microperforates_Globigerinita_glutinata_NA_NA_NA	-	-	-	-	-
ISU221	2	4	Yes	R-650_2_4_4	0	0	0	0	0	2	0	0	0	0	0	0	0	0	0	0	0	0	0	0	0	2	0	0	0	0	0	0	0	0	0	4	Microperforates_Globigerinita_glutinata	Microperforates	Globigerinita	glutinata	-	FJ643286_Microperforates_Globigerinita_glutinata_I_NA_NA;KM193484_Microperforates_Globigerinita_glutinata_NA_NA_NA	Microperforates	Globigerinita	uvula	I	Microperforates_Globigerinita_uvula_I
ISU222	1	7	NO	-	0	0	0	0	0	0	0	0	0	0	0	0	0	0	0	0	0	0	0	0	0	0	0	0	0	7	0	0	0	0	0	1	Non-Spinose_Neogloboquadrina_pachyderma_I_NA_NA	Non-Spinose	Neogloboquadrina	pachyderma	I	NAAY305329_Non-Spinose_Neogloboquadrina_pachyderma_I_NA_NA;	-	-	-	-	-
ISU223	1	46	Yes	R-202_1_46_2	0	0	0	0	0	46	0	0	0	0	0	0	0	0	0	0	0	0	0	0	0	0	0	0	0	0	0	0	0	0	0	2	Microperforates_Globigerinita_glutinata	Microperforates	Globigerinita	glutinata	-	JQ799900_Microperforates_Globigerinita_glutinata_IV_NA_NA;FJ643296_Microperforates_Globigerinita_glutinata_III_NA_NA;KM193199_Microperforates_Globigerinita_glutinata_NA_NA_NA;AY453136_Microperforates_Globigerinita_glutinata_III_NA_NA	Microperforates	Globigerinita	glutinata	III	Microperforates_Globigerinita_glutinata_III
ISU224	5	153	Yes	R-91_5_153_1	0	0	0	0	6	49	0	0	0	0	0	0	0	0	0	0	0	0	28	35	0	35	0	0	0	0	0	0	0	0	0	1	Microperforates_Globigerinita_glutinata_III_NA_NA	Microperforates	Globigerinita	glutinata	III	NAFJ643283_Microperforates_Globigerinita_glutinata_III_NA_NA;	Microperforates	Globigerinita	glutinata	III	Microperforates_Globigerinita_glutinata_III
ISU225	2	5	Yes	R-626_2_5_1	0	0	0	0	0	0	0	0	0	0	0	0	0	0	0	0	0	0	0	3	0	2	0	0	0	0	0	0	0	0	0	1	Microperforates_Candeina_nitida_NA_NA_NA	Microperforates	Candeina	nitida	NA	NAAB263435_Microperforates_Candeina_nitida_NA_NA_NA;	Microperforates	Candeina	nitida	I	Microperforates_Candeina_nitida_I
ISU226	1	14	Yes	R-390_1_14_0	0	0	0	0	0	0	0	0	0	0	0	0	0	0	0	0	0	0	0	14	0	0	0	0	0	0	0	0	0	0	0	0	Microperforates_Globigerinita_uvula_NA_NA_NA	Microperforates	Globigerinita	uvula	NA	NAKM193075_Microperforates_Globigerinita_uvula_NA_NA_NA;	Microperforates	Globigerinita	uvula	I	Microperforates_Globigerinita_uvula_I
ISU227	1	2	NO	-	0	0	0	0	0	0	0	0	0	0	0	0	0	0	0	0	0	0	0	0	0	0	0	0	0	0	0	0	2	0	0	1	Non-Spinose_Neogloboquadrina_pachyderma_IV_NA_NA	Non-Spinose	Neogloboquadrina	pachyderma	IV	NAKM193680_Non-Spinose_Neogloboquadrina_pachyderma_IV_NA_NA;	-	-	-	-	-
ISU228	3	7	Yes	R-538_3_7_1	0	0	0	0	0	3	0	0	0	0	0	0	0	0	0	0	0	0	0	2	0	2	0	0	0	0	0	0	0	0	0	1	Microperforates_Globigerinita_glutinata	Microperforates	Globigerinita	glutinata	-	JQ799900_Microperforates_Globigerinita_glutinata_IV_NA_NA;FJ643296_Microperforates_Globigerinita_glutinata_III_NA_NA;KM193199_Microperforates_Globigerinita_glutinata_NA_NA_NA;AY453136_Microperforates_Globigerinita_glutinata_III_NA_NA	Microperforates	Globigerinita	glutinata	III	Microperforates_Globigerinita_glutinata_III
ISU229	1	4	NO	-	0	0	0	0	0	0	0	0	0	0	0	4	0	0	0	0	0	0	0	0	0	0	0	0	0	0	0	0	0	0	0	5	Non-Spinose_Neogloboquadrina_pachyderma_I_NA_NA	Non-Spinose	Neogloboquadrina	pachyderma	I	NAAY305329_Non-Spinose_Neogloboquadrina_pachyderma_I_NA_NA;	-	-	-	-	-
ISU23	1	2	NO	-	0	0	0	0	0	0	0	0	0	0	0	0	0	0	0	0	0	0	0	0	0	2	0	0	0	0	0	0	0	0	0	3	Microperforates_Globigerinita_glutinata	Microperforates	Globigerinita	glutinata	-	FJ643294_Microperforates_Globigerinita_glutinata_I_NA_NA;KM193151_Microperforates_Globigerinita_glutinata_NA_NA_NA;KM193497_Microperforates_Globigerinita_glutinata_NA_NA_NA;FJ643283_Microperforates_Globigerinita_glutinata_III_NA_NA	-	-	-	-	-
ISU230	5	69	Yes	R-158_5_69_1	0	0	0	0	6	27	0	0	0	0	0	0	0	0	0	0	0	0	10	11	0	15	0	0	0	0	0	0	0	0	0	1	Microperforates_Globigerinita_glutinata_III_NA_NA	Microperforates	Globigerinita	glutinata	III	NAFJ643283_Microperforates_Globigerinita_glutinata_III_NA_NA;	Microperforates	Globigerinita	glutinata	III	Microperforates_Globigerinita_glutinata_III
ISU231	4	196	Yes	R-79_4_196_1	0	0	0	0	0	17	0	0	0	0	0	0	0	0	0	0	0	0	49	61	0	69	0	0	0	0	0	0	0	0	0	1	Microperforates_Globigerinita_glutinata_III_NA_NA	Microperforates	Globigerinita	glutinata	III	NAFJ643283_Microperforates_Globigerinita_glutinata_III_NA_NA;	Microperforates	Globigerinita	glutinata	III	Microperforates_Globigerinita_glutinata_III
ISU232	4	15	Yes	R-383_4_15_1	0	0	0	0	0	6	0	0	0	0	0	0	0	0	0	0	0	0	2	4	0	3	0	0	0	0	0	0	0	0	0	1	Microperforates_Globigerinita_glutinata	Microperforates	Globigerinita	glutinata	-	JQ799900_Microperforates_Globigerinita_glutinata_IV_NA_NA;FJ643296_Microperforates_Globigerinita_glutinata_III_NA_NA;KM193199_Microperforates_Globigerinita_glutinata_NA_NA_NA;AY453136_Microperforates_Globigerinita_glutinata_III_NA_NA	Microperforates	Globigerinita	glutinata	III	Microperforates_Globigerinita_glutinata_III
ISU233	1	2	NO	-	0	0	0	0	0	2	0	0	0	0	0	0	0	0	0	0	0	0	0	0	0	0	0	0	0	0	0	0	0	0	0	5	Microperforates_Globigerinita_uvula	Microperforates	Globigerinita	uvula	-	FJ643298_Microperforates_Globigerinita_uvula_I_NA_NA;KM193079_Microperforates_Globigerinita_uvula_NA_NA_NA;KM193070_Microperforates_Globigerinita_uvula_NA_NA_NA;	-	-	-	-	-
ISU234	3	6	Yes	R-584_3_6_1	0	0	0	0	0	2	0	0	0	0	0	0	0	0	0	0	0	0	0	2	0	2	0	0	0	0	0	0	0	0	0	1	Microperforates_Globigerinita_glutinata_III_NA_NA	Microperforates	Globigerinita	glutinata	III	NAFJ643283_Microperforates_Globigerinita_glutinata_III_NA_NA;	Microperforates	Globigerinita	glutinata	III	Microperforates_Globigerinita_glutinata_III
ISU235	1	2	NO	-	0	0	0	0	0	0	0	0	0	0	0	0	0	0	0	0	0	0	0	0	0	2	0	0	0	0	0	0	0	0	0	1	Spinose_Globigerina_falconensis_NA_NA_NA	Spinose	Globigerina	falconensis	NA	NAAF387172_Spinose_Globigerina_falconensis_NA_NA_NA;	-	-	-	-	-
ISU236	1	4	NO	-	0	0	0	0	4	0	0	0	0	0	0	0	0	0	0	0	0	0	0	0	0	0	0	0	0	0	0	0	0	0	0	5	Microperforates_Globigerinita_glutinata	Microperforates	Globigerinita	glutinata	-	KM193484_Microperforates_Globigerinita_glutinata_NA_NA_NA;FJ643286_Microperforates_Globigerinita_glutinata_I_NA_NA	-	-	-	-	-
ISU237	1	2	NO	-	2	0	0	0	0	0	0	0	0	0	0	0	0	0	0	0	0	0	0	0	0	0	0	0	0	0	0	0	0	0	0	1	Microperforates_Globigerinita_uvula	Microperforates	Globigerinita	uvula	-	KM193181_Microperforates_Globigerinita_uvula_NA_NA_NA;KM193691_Microperforates_Globigerinita_uvula_NA_NA_NA;KM193364_Microperforates_Globigerinita_uvula_NA_NA_NA;AF387173_Microperforates_Globigerinita_uvula_II_NA_NA;KM194324_Microperforates_Globigerinita_uvula_NA_NA_NA;	-	-	-	-	-
ISU238	1	2	NO	-	0	0	0	0	0	0	0	0	0	0	0	0	0	0	0	0	0	0	0	0	0	2	0	0	0	0	0	0	0	0	0	3	Microperforates_Globigerinita_glutinata	Microperforates	Globigerinita	glutinata	-	FJ643294_Microperforates_Globigerinita_glutinata_I_NA_NA;KM193151_Microperforates_Globigerinita_glutinata_NA_NA_NA;KM193497_Microperforates_Globigerinita_glutinata_NA_NA_NA;FJ643283_Microperforates_Globigerinita_glutinata_III_NA_NA	-	-	-	-	-
ISU239	1	2	NO	-	0	0	0	2	0	0	0	0	0	0	0	0	0	0	0	0	0	0	0	0	0	0	0	0	0	0	0	0	0	0	0	2	Non-Spinose_Globorotalia_inflata	Non-Spinose	Globorotalia	inflata	-	KJ633233_Non-Spinose_Globorotalia_inflata_I_NA_NA;KM194451_Non-Spinose_Globorotalia_inflata_NA_NA_NA;KM194357_Non-Spinose_Globorotalia_inflata_NA_NA_NA;KM194347_Non-Spinose_Globorotalia_inflata_NA_NA_NA;KM194295_Non-Spinose_Globorotalia_inflata_NA_NA_NA;KJ633235_Non-Spinose_Globorotalia_inflata_I_NA_NA;KJ633236_Non-Spinose_Globorotalia_inflata_I_NA_NA;KJ633239_Non-Spinose_Globorotalia_inflata_I_N…	-	-	-	-	-
ISU24	2	5	Yes	R-635_2_5_1	0	0	0	0	0	0	0	0	0	0	0	0	0	0	0	0	0	0	3	0	0	2	0	0	0	0	0	0	0	0	0	1	Microperforates_Globigerinita_glutinata_III_NA_NA	Microperforates	Globigerinita	glutinata	III	NAFJ643283_Microperforates_Globigerinita_glutinata_III_NA_NA;	Microperforates	Globigerinita	glutinata	III	Microperforates_Globigerinita_glutinata_III
ISU240	1	2	NO	-	0	0	0	0	0	2	0	0	0	0	0	0	0	0	0	0	0	0	0	0	0	0	0	0	0	0	0	0	0	0	0	2	Microperforates_Globigerinita_glutinata_III_NA_NA	Microperforates	Globigerinita	glutinata	III	NAFJ643283_Microperforates_Globigerinita_glutinata_III_NA_NA;	-	-	-	-	-
ISU241	1	5	NO	-	0	0	0	0	0	0	0	0	0	0	0	0	0	0	0	0	0	0	0	5	0	0	0	0	0	0	0	0	0	0	0	3	Microperforates_Globigerinita_glutinata	Microperforates	Globigerinita	glutinata	-	FJ643294_Microperforates_Globigerinita_glutinata_I_NA_NA;KM193497_Microperforates_Globigerinita_glutinata_NA_NA_NA;FJ643283_Microperforates_Globigerinita_glutinata_III_NA_NA;KM193151_Microperforates_Globigerinita_glutinata_NA_NA_NA	-	-	-	-	-
ISU242	1	2	NO	-	0	0	0	0	0	0	0	0	0	0	0	0	0	0	0	0	0	0	0	2	0	0	0	0	0	0	0	0	0	0	0	5	Microperforates_Globigerinita_glutinata	Microperforates	Globigerinita	glutinata	-	JQ799900_Microperforates_Globigerinita_glutinata_IV_NA_NA;FJ643288_Microperforates_Globigerinita_glutinata_I_NA_NA;KM193539_Microperforates_Globigerinita_glutinata_NA_NA_NA;FJ643296_Microperforates_Globigerinita_glutinata_III_NA_NA;FJ643277_Microperforates_Globigerinita_glutinata_III_NA_NA;KM193303_Microperforates_Globigerinita_glutinata_NA_NA_NA;KM193199_Microperforates_Globigerinita_glutinata_N…	-	-	-	-	-
ISU243	1	3	NO	-	0	0	0	0	0	0	0	0	0	0	0	0	0	0	0	0	0	0	0	3	0	0	0	0	0	0	0	0	0	0	0	1	Microperforates_Candeina_nitida_NA_NA_NA	Microperforates	Candeina	nitida	NA	NAAB263435_Microperforates_Candeina_nitida_NA_NA_NA;	-	-	-	-	-
ISU244	2	10	Yes	R-449_2_10_4	0	0	0	0	0	0	0	0	0	0	2	8	0	0	0	0	0	0	0	0	0	0	0	0	0	0	0	0	0	0	0	4	Non-Spinose_Neogloboquadrina_pachyderma_I_NA_NA	Non-Spinose	Neogloboquadrina	pachyderma	I	NAAY305329_Non-Spinose_Neogloboquadrina_pachyderma_I_NA_NA;	Non-Spinose	Neogloboquadrina	pachyderma	I	Non-Spinose_Neogloboquadrina_pachyderma_I
ISU245	1	9	NO	-	0	0	0	0	0	0	0	0	0	0	0	0	0	0	0	0	0	0	0	0	0	0	0	0	0	0	0	0	9	0	0	1	Non-Spinose_Neogloboquadrina_pachyderma_IV_NA_NA	Non-Spinose	Neogloboquadrina	pachyderma	IV	NAKM193680_Non-Spinose_Neogloboquadrina_pachyderma_IV_NA_NA;	-	-	-	-	-
ISU246	5	43	Yes	R-215_5_43_1	0	0	0	0	4	6	0	0	0	0	0	0	0	0	0	0	0	0	11	9	0	13	0	0	0	0	0	0	0	0	0	1	Microperforates_Globigerinita_glutinata	Microperforates	Globigerinita	glutinata	-	FJ643296_Microperforates_Globigerinita_glutinata_III_NA_NA;KM193199_Microperforates_Globigerinita_glutinata_NA_NA_NA;FJ643277_Microperforates_Globigerinita_glutinata_III_NA_NA;AY453136_Microperforates_Globigerinita_glutinata_III_NA_NA;JQ799900_Microperforates_Globigerinita_glutinata_IV_NA_NA;	Microperforates	Globigerinita	glutinata	III	Microperforates_Globigerinita_glutinata_III
ISU247	1	2	NO	-	0	0	0	0	0	0	0	0	0	0	0	0	0	0	0	0	0	0	0	0	0	0	0	0	0	2	0	0	0	0	0	2	Non-Spinose_Neogloboquadrina_pachyderma_I_NA_NA	Non-Spinose	Neogloboquadrina	pachyderma	I	NAAY305329_Non-Spinose_Neogloboquadrina_pachyderma_I_NA_NA;	-	-	-	-	-
ISU248	5	65	Yes	R-161_5_65_1	0	0	0	0	2	11	0	0	0	0	0	0	0	0	0	0	0	0	13	15	0	24	0	0	0	0	0	0	0	0	0	1	Microperforates_Globigerinita_glutinata	Microperforates	Globigerinita	glutinata	-	FJ643296_Microperforates_Globigerinita_glutinata_III_NA_NA;KM193199_Microperforates_Globigerinita_glutinata_NA_NA_NA;FJ643277_Microperforates_Globigerinita_glutinata_III_NA_NA;AY453136_Microperforates_Globigerinita_glutinata_III_NA_NA;JQ799900_Microperforates_Globigerinita_glutinata_IV_NA_NA;	Microperforates	Globigerinita	glutinata	III	Microperforates_Globigerinita_glutinata_III
ISU249	4	27	Yes	R-282_4_27_1	0	0	0	0	0	5	0	0	0	0	0	0	0	0	0	0	0	0	10	7	0	5	0	0	0	0	0	0	0	0	0	1	Microperforates_Globigerinita_glutinata	Microperforates	Globigerinita	glutinata	-	JQ799900_Microperforates_Globigerinita_glutinata_IV_NA_NA;FJ643296_Microperforates_Globigerinita_glutinata_III_NA_NA;KM193199_Microperforates_Globigerinita_glutinata_NA_NA_NA;AY453136_Microperforates_Globigerinita_glutinata_III_NA_NA	Microperforates	Globigerinita	glutinata	III	Microperforates_Globigerinita_glutinata_III
ISU25	1	15	Yes	R-372_1_15_4	0	0	0	0	0	0	0	0	0	0	0	0	0	0	0	0	0	0	0	15	0	0	0	0	0	0	0	0	0	0	0	4	Microperforates_Candeina_nitida_NA_NA_NA	Microperforates	Candeina	nitida	NA	NAAB468837_Microperforates_Candeina_nitida_NA_NA_NA;AB468836_Microperforates_Candeina_nitida_NA_NA_NA;KJ633212_Microperforates_Candeina_nitida_NA_NA_NA;AB263435_Microperforates_Candeina_nitida_NA_NA_NA	Microperforates	Candeina	nitida	I	Microperforates_Candeina_nitida_I
ISU250	1	2	NO	-	0	0	0	0	0	0	0	0	0	0	0	0	0	0	0	0	0	0	0	0	0	2	0	0	0	0	0	0	0	0	0	4	Microperforates_Globigerinita_glutinata	Microperforates	Globigerinita	glutinata	-	FJ643286_Microperforates_Globigerinita_glutinata_I_NA_NA;KM193484_Microperforates_Globigerinita_glutinata_NA_NA_NA	-	-	-	-	-
ISU251	4	22	Yes	R-308_4_22_1	0	0	0	0	0	0	0	0	0	3	13	4	0	0	0	0	0	0	0	0	0	0	0	0	0	2	0	0	0	0	0	1	Non-Spinose_Neogloboquadrina_pachyderma_I_NA_NA	Non-Spinose	Neogloboquadrina	pachyderma	I	NAAY305329_Non-Spinose_Neogloboquadrina_pachyderma_I_NA_NA;	Non-Spinose	Neogloboquadrina	pachyderma	I	Non-Spinose_Neogloboquadrina_pachyderma_I
ISU252	1	2	NO	-	0	0	0	0	0	0	0	0	0	0	0	0	0	0	0	0	0	0	0	2	0	0	0	0	0	0	0	0	0	0	0	1	Microperforates_Globigerinita_glutinata	Microperforates	Globigerinita	glutinata	-	JQ799900_Microperforates_Globigerinita_glutinata_IV_NA_NA;FJ643296_Microperforates_Globigerinita_glutinata_III_NA_NA;KM193199_Microperforates_Globigerinita_glutinata_NA_NA_NA;AY453136_Microperforates_Globigerinita_glutinata_III_NA_NA	-	-	-	-	-
ISU253	1	2	NO	-	0	0	0	0	0	0	0	0	0	0	0	2	0	0	0	0	0	0	0	0	0	0	0	0	0	0	0	0	0	0	0	1	Non-Spinose_Neogloboquadrina_pachyderma_I_NA_NA	Non-Spinose	Neogloboquadrina	pachyderma	I	NAAY305329_Non-Spinose_Neogloboquadrina_pachyderma_I_NA_NA;	-	-	-	-	-
ISU254	1	2	NO	-	0	0	0	0	0	0	0	0	0	0	0	0	0	0	0	0	0	0	0	2	0	0	0	0	0	0	0	0	0	0	0	5	Microperforates_Globigerinita_glutinata	Microperforates	Globigerinita	glutinata	-	JQ799900_Microperforates_Globigerinita_glutinata_IV_NA_NA;FJ643288_Microperforates_Globigerinita_glutinata_I_NA_NA;KM193539_Microperforates_Globigerinita_glutinata_NA_NA_NA;FJ643296_Microperforates_Globigerinita_glutinata_III_NA_NA;FJ643277_Microperforates_Globigerinita_glutinata_III_NA_NA;KM193303_Microperforates_Globigerinita_glutinata_NA_NA_NA;KM193199_Microperforates_Globigerinita_glutinata_N…	-	-	-	-	-
ISU255	1	2	NO	-	0	0	0	0	0	0	0	0	0	0	0	0	0	0	0	0	0	0	0	2	0	0	0	0	0	0	0	0	0	0	0	2	Microperforates_Globigerinita_glutinata	Microperforates	Globigerinita	glutinata	-	JQ799900_Microperforates_Globigerinita_glutinata_IV_NA_NA;FJ643296_Microperforates_Globigerinita_glutinata_III_NA_NA;KM193199_Microperforates_Globigerinita_glutinata_NA_NA_NA;AY453136_Microperforates_Globigerinita_glutinata_III_NA_NA	-	-	-	-	-
ISU256	2	7	Yes	R-521_2_7_7	0	0	0	0	0	4	0	0	0	0	0	0	0	0	0	0	0	0	0	3	0	0	0	0	0	0	0	0	0	0	0	7	Microperforates_Globigerinita_uvula	Microperforates	Globigerinita	uvula	-	FJ643298_Microperforates_Globigerinita_uvula_I_NA_NA;KM193079_Microperforates_Globigerinita_uvula_NA_NA_NA;KM193070_Microperforates_Globigerinita_uvula_NA_NA_NA;	Microperforates	Globigerinita	uvula	I	Microperforates_Globigerinita_uvula_I
ISU257	1	3	NO	-	0	0	0	0	0	0	0	0	0	0	0	0	0	0	0	0	0	0	0	3	0	0	0	0	0	0	0	0	0	0	0	1	Microperforates_Globigerinita_glutinata	Microperforates	Globigerinita	glutinata	-	FJ643418_Microperforates_Globigerinita_glutinata_NA_NA_NA;AB468827_Microperforates_Globigerinita_glutinata_II_NA_NA;AB468829_Microperforates_Globigerinita_glutinata_II_NA_NA;	-	-	-	-	-
ISU258	1	2	NO	-	0	0	0	0	0	2	0	0	0	0	0	0	0	0	0	0	0	0	0	0	0	0	0	0	0	0	0	0	0	0	0	4	Microperforates_Globigerinita_glutinata	Microperforates	Globigerinita	glutinata	-	FJ643286_Microperforates_Globigerinita_glutinata_I_NA_NA;KM193484_Microperforates_Globigerinita_glutinata_NA_NA_NA	-	-	-	-	-
ISU259	4	18	Yes	R-352_4_18_4	0	0	0	0	2	5	0	0	0	0	0	0	0	0	0	0	0	0	4	7	0	0	0	0	0	0	0	0	0	0	0	4	Microperforates_Candeina_nitida_NA_NA_NA	Microperforates	Candeina	nitida	NA	NAAB263435_Microperforates_Candeina_nitida_NA_NA_NA;AB468836_Microperforates_Candeina_nitida_NA_NA_NA;KJ633212_Microperforates_Candeina_nitida_NA_NA_NA;AB468837_Microperforates_Candeina_nitida_NA_NA_NA	Microperforates	Candeina	nitida	I	Microperforates_Candeina_nitida_I
ISU26	1	2	NO	-	0	0	0	0	0	0	0	0	0	0	0	0	0	0	0	0	0	0	0	2	0	0	0	0	0	0	0	0	0	0	0	1	Microperforates_Candeina_nitida_NA_NA_NA	Microperforates	Candeina	nitida	NA	NAAB263435_Microperforates_Candeina_nitida_NA_NA_NA;	-	-	-	-	-
ISU260	3	645	Yes	R-35_3_645_7	0	0	0	0	286	17	0	0	0	0	0	0	0	0	0	0	0	0	342	0	0	0	0	0	0	0	0	0	0	0	0	7	Microperforates_Globigerinita_uvula	Microperforates	Globigerinita	uvula	-	FJ643298_Microperforates_Globigerinita_uvula_I_NA_NA;KM193160_Microperforates_Globigerinita_uvula_NA_NA_NA;KM193079_Microperforates_Globigerinita_uvula_NA_NA_NA;KM193075_Microperforates_Globigerinita_uvula_NA_NA_NA;KM193070_Microperforates_Globigerinita_uvula_NA_NA_NA;	Microperforates	Globigerinita	uvula	I	Microperforates_Globigerinita_uvula_I
ISU261	1	2	NO	-	0	0	0	0	0	0	0	0	0	0	0	0	0	0	0	0	0	0	0	0	0	2	0	0	0	0	0	0	0	0	0	5	Microperforates_Candeina_nitida_NA_NA_NA	Microperforates	Candeina	nitida	NA	NAAB468837_Microperforates_Candeina_nitida_NA_NA_NA;AB468836_Microperforates_Candeina_nitida_NA_NA_NA;KJ633212_Microperforates_Candeina_nitida_NA_NA_NA;AB263435_Microperforates_Candeina_nitida_NA_NA_NA	-	-	-	-	-
ISU262	3	8	Yes	R-508_3_8_1	0	0	0	0	0	0	0	0	0	0	0	0	0	0	0	0	0	0	3	2	0	3	0	0	0	0	0	0	0	0	0	1	Microperforates_Globigerinita_glutinata	Microperforates	Globigerinita	glutinata	-	JQ799900_Microperforates_Globigerinita_glutinata_IV_NA_NA;FJ643296_Microperforates_Globigerinita_glutinata_III_NA_NA;FJ643277_Microperforates_Globigerinita_glutinata_III_NA_NA;KM193199_Microperforates_Globigerinita_glutinata_NA_NA_NA;AY453136_Microperforates_Globigerinita_glutinata_III_NA_NA;	Microperforates	Globigerinita	glutinata	III	Microperforates_Globigerinita_glutinata_III
ISU263	1	6	NO	-	0	0	0	0	0	0	0	0	0	0	0	0	0	0	0	0	0	0	0	0	0	6	0	0	0	0	0	0	0	0	0	2	Microperforates_Globigerinita_glutinata	Microperforates	Globigerinita	glutinata	-	FJ643296_Microperforates_Globigerinita_glutinata_III_NA_NA;JQ799900_Microperforates_Globigerinita_glutinata_IV_NA_NA;KM193199_Microperforates_Globigerinita_glutinata_NA_NA_NA;AY453136_Microperforates_Globigerinita_glutinata_III_NA_NA	-	-	-	-	-
ISU264	1	2	NO	-	0	0	0	0	0	2	0	0	0	0	0	0	0	0	0	0	0	0	0	0	0	0	0	0	0	0	0	0	0	0	0	5	Microperforates_Globigerinita_uvula	Microperforates	Globigerinita	uvula	-	FJ643298_Microperforates_Globigerinita_uvula_I_NA_NA;KM193079_Microperforates_Globigerinita_uvula_NA_NA_NA;KM193070_Microperforates_Globigerinita_uvula_NA_NA_NA;	-	-	-	-	-
ISU265	4	16	Yes	R-368_4_16_1	0	0	0	0	0	3	0	0	0	0	0	0	0	0	0	0	0	0	2	6	0	5	0	0	0	0	0	0	0	0	0	1	Microperforates_Globigerinita_glutinata_III_NA_NA	Microperforates	Globigerinita	glutinata	III	NAFJ643296_Microperforates_Globigerinita_glutinata_III_NA_NA;	Microperforates	Globigerinita	glutinata	III	Microperforates_Globigerinita_glutinata_III
ISU266	5	73	Yes	R-147_5_73_1	0	0	0	0	3	41	0	0	0	0	0	0	0	0	0	0	0	0	9	11	0	9	0	0	0	0	0	0	0	0	0	1	Microperforates_Globigerinita_glutinata	Microperforates	Globigerinita	glutinata	-	FJ643296_Microperforates_Globigerinita_glutinata_III_NA_NA;KM193199_Microperforates_Globigerinita_glutinata_NA_NA_NA;FJ643277_Microperforates_Globigerinita_glutinata_III_NA_NA;AY453136_Microperforates_Globigerinita_glutinata_III_NA_NA;JQ799900_Microperforates_Globigerinita_glutinata_IV_NA_NA;	Microperforates	Globigerinita	glutinata	III	Microperforates_Globigerinita_glutinata_III
ISU267	1	3	NO	-	0	0	0	0	0	0	0	0	0	0	0	0	0	0	0	0	0	0	0	3	0	0	0	0	0	0	0	0	0	0	0	6	Microperforates_Globigerinita_glutinata	Microperforates	Globigerinita	glutinata	-	FJ643286_Microperforates_Globigerinita_glutinata_I_NA_NA;KM193484_Microperforates_Globigerinita_glutinata_NA_NA_NA	-	-	-	-	-
ISU268	1	4	NO	-	4	0	0	0	0	0	0	0	0	0	0	0	0	0	0	0	0	0	0	0	0	0	0	0	0	0	0	0	0	0	0	1	Microperforates_Globigerinita_uvula_NA_NA_NA	Microperforates	Globigerinita	uvula	NA	NAKM193691_Microperforates_Globigerinita_uvula_NA_NA_NA;	-	-	-	-	-
ISU269	3	6	Yes	R-567_3_6_1	0	0	0	0	0	0	0	0	0	0	2	2	0	0	0	0	0	0	0	0	0	0	0	0	0	2	0	0	0	0	0	1	Non-Spinose_Neogloboquadrina_pachyderma_I_NA_NA	Non-Spinose	Neogloboquadrina	pachyderma	I	NAAY305329_Non-Spinose_Neogloboquadrina_pachyderma_I_NA_NA;	Non-Spinose	Neogloboquadrina	pachyderma	I	Non-Spinose_Neogloboquadrina_pachyderma_I
ISU27	1	2	NO	-	0	0	0	0	0	0	0	0	0	0	0	0	0	0	0	0	0	0	0	2	0	0	0	0	0	0	0	0	0	0	0	7	Microperforates_Globigerinita_uvula	Microperforates	Globigerinita	uvula	-	FJ643298_Microperforates_Globigerinita_uvula_I_NA_NA;KM193160_Microperforates_Globigerinita_uvula_NA_NA_NA;KM193075_Microperforates_Globigerinita_uvula_NA_NA_NA;KM193070_Microperforates_Globigerinita_uvula_NA_NA_NA;KM193079_Microperforates_Globigerinita_uvula_NA_NA_NA;	-	-	-	-	-
ISU270	1	9	NO	-	0	0	0	0	0	0	0	0	0	0	0	0	0	0	0	0	0	0	0	0	0	0	0	0	0	0	0	0	9	0	0	1	Non-Spinose_Neogloboquadrina_pachyderma_IV_NA_NA	Non-Spinose	Neogloboquadrina	pachyderma	IV	NAKM193680_Non-Spinose_Neogloboquadrina_pachyderma_IV_NA_NA;	-	-	-	-	-
ISU271	2	7	Yes	R-543_2_7_1	0	0	0	0	0	2	0	0	0	0	0	0	0	0	0	0	0	0	0	0	0	5	0	0	0	0	0	0	0	0	0	1	Microperforates_Globigerinita_glutinata_NA_NA_NA	Microperforates	Globigerinita	glutinata	NA	NAKM193539_Microperforates_Globigerinita_glutinata_NA_NA_NA;	Microperforates	Globigerinita	glutinata	I	Microperforates_Globigerinita_glutinata_I
ISU272	3	246	Yes	R-61_3_246_0	0	0	0	0	0	0	0	0	0	0	0	0	185	0	0	0	0	0	0	0	0	0	0	0	0	0	0	0	0	55	6	0	Spinose_Globigerina_bulloides_II_c_NA	Spinose	Globigerina	bulloides	II	cAF250111_Spinose_Globigerina_bulloides_II_c_NA;	Spinose	Globigerina	bulloides	II	Spinose_Globigerina_bulloides_II
ISU273	3	12	Yes	R-423_3_12_1	0	0	0	0	0	2	0	0	0	0	0	0	0	0	0	0	0	0	0	7	0	3	0	0	0	0	0	0	0	0	0	1	Microperforates_Globigerinita_glutinata	Microperforates	Globigerinita	glutinata	-	AB468829_Microperforates_Globigerinita_glutinata_II_NA_NA;AB468827_Microperforates_Globigerinita_glutinata_II_NA_NA;FJ643418_Microperforates_Globigerinita_glutinata_NA_NA_NA;	Microperforates	Globigerinita	glutinata	III	Microperforates_Globigerinita_glutinata_III
ISU274	1	2	NO	-	0	0	0	0	0	0	0	0	0	0	0	0	0	0	0	0	0	0	0	2	0	0	0	0	0	0	0	0	0	0	0	6	Microperforates_Globigerinita_glutinata	Microperforates	Globigerinita	glutinata	-	FJ643286_Microperforates_Globigerinita_glutinata_I_NA_NA;KM193484_Microperforates_Globigerinita_glutinata_NA_NA_NA	-	-	-	-	-
ISU275	1	287	Yes	R-55_1_287_2	0	0	0	0	0	0	0	0	0	0	0	0	0	0	0	0	0	0	0	0	0	287	0	0	0	0	0	0	0	0	0	2	Microperforates_Globigerinita_glutinata	Microperforates	Globigerinita	glutinata	-	FJ643277_Microperforates_Globigerinita_glutinata_III_NA_NA;FJ643296_Microperforates_Globigerinita_glutinata_III_NA_NA;JQ799900_Microperforates_Globigerinita_glutinata_IV_NA_NA;KM193199_Microperforates_Globigerinita_glutinata_NA_NA_NA;AY453136_Microperforates_Globigerinita_glutinata_III_NA_NA;	Microperforates	Globigerinita	glutinata	III	Microperforates_Globigerinita_glutinata_III
ISU276	2	4	Yes	R-673_2_4_1	0	0	0	0	0	0	0	0	0	2	2	0	0	0	0	0	0	0	0	0	0	0	0	0	0	0	0	0	0	0	0	1	Non-Spinose_Neogloboquadrina_pachyderma_I_NA_NA	Non-Spinose	Neogloboquadrina	pachyderma	I	NAAY305329_Non-Spinose_Neogloboquadrina_pachyderma_I_NA_NA;	Non-Spinose	Neogloboquadrina	pachyderma	I	Non-Spinose_Neogloboquadrina_pachyderma_I
ISU277	1	3	NO	-	0	0	0	0	0	0	0	0	0	0	0	0	0	0	0	0	0	0	0	0	0	3	0	0	0	0	0	0	0	0	0	7	Microperforates_Globigerinita_uvula	Microperforates	Globigerinita	uvula	-	KM193079_Microperforates_Globigerinita_uvula_NA_NA_NA;KM193160_Microperforates_Globigerinita_uvula_NA_NA_NA;FJ643298_Microperforates_Globigerinita_uvula_I_NA_NA;KM193075_Microperforates_Globigerinita_uvula_NA_NA_NA;KM193070_Microperforates_Globigerinita_uvula_NA_NA_NA;	-	-	-	-	-
ISU278	1	18	Yes	R-343_1_18_8	0	0	18	0	0	0	0	0	0	0	0	0	0	0	0	0	0	0	0	0	0	0	0	0	0	0	0	0	0	0	0	8	Non-Spiral_Galietelia_vivans_NA_NA_NA	Non-Spiral	Galietelia	vivans	NA	NAAB364519_Non-Spiral_Galietelia_vivans_NA_NA_NA;AB364517_Non-Spiral_Galietelia_vivans_NA_NA_NA;AB364518_Non-Spiral_Galietelia_vivans_NA_NA_NA;	Unidentified	Gallitellia	vivans	U1	Unidentified_Gallitellia_vivans_U1
ISU279	1	2	NO	-	0	0	0	0	0	0	0	0	0	0	0	0	0	0	0	0	0	0	0	0	0	2	0	0	0	0	0	0	0	0	0	1	Microperforates_Globigerinita_glutinata	Microperforates	Globigerinita	glutinata	-	FJ643296_Microperforates_Globigerinita_glutinata_III_NA_NA;JQ799900_Microperforates_Globigerinita_glutinata_IV_NA_NA;KM193199_Microperforates_Globigerinita_glutinata_NA_NA_NA;AY453136_Microperforates_Globigerinita_glutinata_III_NA_NA	-	-	-	-	-
ISU28	3	9	Yes	R-478_3_9_1	0	0	0	0	0	0	0	0	0	2	5	0	0	0	0	0	0	0	0	0	0	0	0	0	0	2	0	0	0	0	0	1	Non-Spinose_Neogloboquadrina_pachyderma_I_NA_NA	Non-Spinose	Neogloboquadrina	pachyderma	I	NAAY305329_Non-Spinose_Neogloboquadrina_pachyderma_I_NA_NA;	Non-Spinose	Neogloboquadrina	pachyderma	I	Non-Spinose_Neogloboquadrina_pachyderma_I
ISU280	4	52	Yes	R-179_4_52_1	0	0	0	0	0	21	0	0	0	0	0	0	0	0	0	0	0	0	7	10	0	14	0	0	0	0	0	0	0	0	0	1	Microperforates_Globigerinita_glutinata_III_NA_NA	Microperforates	Globigerinita	glutinata	III	NAFJ643283_Microperforates_Globigerinita_glutinata_III_NA_NA;	Microperforates	Globigerinita	glutinata	III	Microperforates_Globigerinita_glutinata_III
ISU281	1	2	NO	-	0	0	0	0	0	0	0	0	0	0	0	0	0	0	0	0	0	0	0	0	0	2	0	0	0	0	0	0	0	0	0	1	Spinose_Globigerina_bulloides	Spinose	Globigerina	bulloides	-	GQ293072_Spinose_Globigerina_bulloides_I_c_NA;GU060421_Spinose_Globigerina_bulloides_I_e_NA;GQ293070_Spinose_Globigerina_bulloides_I_d_NA;Z83957_Spinose_Globigerina_bulloides_NA_NA_NA	-	-	-	-	-
ISU282	1	2	NO	-	0	0	0	0	2	0	0	0	0	0	0	0	0	0	0	0	0	0	0	0	0	0	0	0	0	0	0	0	0	0	0	1	Microperforates_Candeina_nitida_NA_NA_NA	Microperforates	Candeina	nitida	NA	NAAB263435_Microperforates_Candeina_nitida_NA_NA_NA;	-	-	-	-	-
ISU283	1	2	NO	-	0	0	0	0	0	0	0	0	0	0	0	0	0	0	0	0	0	0	0	2	0	0	0	0	0	0	0	0	0	0	0	1	Microperforates_Candeina_nitida_NA_NA_NA	Microperforates	Candeina	nitida	NA	NAAB263435_Microperforates_Candeina_nitida_NA_NA_NA;	-	-	-	-	-
ISU284	1	6	NO	-	0	0	0	0	0	0	0	0	0	0	0	0	0	0	0	0	0	0	0	0	0	6	0	0	0	0	0	0	0	0	0	3	Microperforates_Globigerinita_glutinata	Microperforates	Globigerinita	glutinata	-	KM193497_Microperforates_Globigerinita_glutinata_NA_NA_NA;FJ643294_Microperforates_Globigerinita_glutinata_I_NA_NA;KM193151_Microperforates_Globigerinita_glutinata_NA_NA_NA;	-	-	-	-	-
ISU285	1	2	NO	-	0	0	0	0	0	0	0	0	0	0	0	0	0	0	0	0	0	0	0	0	0	0	0	0	0	0	0	0	2	0	0	1	Non-Spinose_Neogloboquadrina_pachyderma_IV_NA_NA	Non-Spinose	Neogloboquadrina	pachyderma	IV	NAKM193680_Non-Spinose_Neogloboquadrina_pachyderma_IV_NA_NA;	-	-	-	-	-
ISU286	3	11	Yes	R-438_3_11_1	0	0	0	0	0	0	0	0	0	2	7	0	0	0	0	0	0	0	0	0	0	0	0	0	0	2	0	0	0	0	0	1	Non-Spinose_Neogloboquadrina_pachyderma_I_NA_NA	Non-Spinose	Neogloboquadrina	pachyderma	I	NAAY305329_Non-Spinose_Neogloboquadrina_pachyderma_I_NA_NA;	Non-Spinose	Neogloboquadrina	pachyderma	I	Non-Spinose_Neogloboquadrina_pachyderma_I
ISU287	1	2	NO	-	0	0	0	0	0	0	0	0	0	0	0	0	0	0	0	0	0	0	0	0	0	0	0	0	0	2	0	0	0	0	0	1	Non-Spinose_Neogloboquadrina_pachyderma_I_NA_NA	Non-Spinose	Neogloboquadrina	pachyderma	I	NAAY305329_Non-Spinose_Neogloboquadrina_pachyderma_I_NA_NA;	-	-	-	-	-
ISU288	1	2	NO	-	0	0	0	0	0	2	0	0	0	0	0	0	0	0	0	0	0	0	0	0	0	0	0	0	0	0	0	0	0	0	0	1	Spinose_Globigerina_bulloides	Spinose	Globigerina	bulloides	-	Z83957_Spinose_Globigerina_bulloides_NA_NA_NA;GQ293072_Spinose_Globigerina_bulloides_I_c_NA;GQ293070_Spinose_Globigerina_bulloides_I_d_NA;GU060421_Spinose_Globigerina_bulloides_I_e_NA	-	-	-	-	-
ISU289	3	13	Yes	R-403_3_13_5	0	0	0	0	0	0	0	0	0	0	0	0	0	0	0	0	0	0	5	4	0	4	0	0	0	0	0	0	0	0	0	5	Microperforates_Globigerinita_uvula	Microperforates	Globigerinita	uvula	-	FJ643298_Microperforates_Globigerinita_uvula_I_NA_NA;KM193070_Microperforates_Globigerinita_uvula_NA_NA_NA;KM193079_Microperforates_Globigerinita_uvula_NA_NA_NA;	Microperforates	Globigerinita	uvula	I	Microperforates_Globigerinita_uvula_I
ISU29	1	2	NO	-	0	0	0	0	0	0	0	0	0	0	0	0	0	0	0	0	0	0	0	0	0	2	0	0	0	0	0	0	0	0	0	4	Microperforates_Globigerinita_glutinata	Microperforates	Globigerinita	glutinata	-	FJ643286_Microperforates_Globigerinita_glutinata_I_NA_NA;KM193484_Microperforates_Globigerinita_glutinata_NA_NA_NA	-	-	-	-	-
ISU290	4	48	Yes	R-193_4_48_1	0	0	0	0	4	36	0	0	0	0	0	0	0	0	0	0	0	0	0	3	0	5	0	0	0	0	0	0	0	0	0	1	Microperforates_Globigerinita_glutinata_III_NA_NA	Microperforates	Globigerinita	glutinata	III	NAFJ643283_Microperforates_Globigerinita_glutinata_III_NA_NA;	Microperforates	Globigerinita	glutinata	III	Microperforates_Globigerinita_glutinata_III
ISU291	1	4	NO	-	0	0	0	0	0	0	0	0	0	0	0	0	0	0	0	0	0	0	0	0	0	0	0	0	0	0	0	0	4	0	0	1	Non-Spinose_Neogloboquadrina_pachyderma_IV_NA_NA	Non-Spinose	Neogloboquadrina	pachyderma	IV	NAKM193680_Non-Spinose_Neogloboquadrina_pachyderma_IV_NA_NA;	-	-	-	-	-
ISU292	3	33	Yes	R-246_3_33_2	0	0	0	0	0	10	0	0	0	0	0	0	0	0	0	0	0	0	0	6	0	17	0	0	0	0	0	0	0	0	0	2	Spinose_Globigerina_bulloides	Spinose	Globigerina	bulloides	-	Z83957_Spinose_Globigerina_bulloides_NA_NA_NA;GQ293072_Spinose_Globigerina_bulloides_I_c_NA;GQ293070_Spinose_Globigerina_bulloides_I_d_NA;GU060421_Spinose_Globigerina_bulloides_I_e_NA	Spinose	Globigerina	bulloides	I	Spinose_Globigerina_bulloides_I
ISU293	1	3	NO	-	0	0	0	0	0	0	0	0	0	0	0	3	0	0	0	0	0	0	0	0	0	0	0	0	0	0	0	0	0	0	0	2	Non-Spinose_Neogloboquadrina_pachyderma_I_NA_NA	Non-Spinose	Neogloboquadrina	pachyderma	I	NAAY305329_Non-Spinose_Neogloboquadrina_pachyderma_I_NA_NA;	-	-	-	-	-
ISU294	1	7	NO	-	0	0	0	0	0	0	0	0	0	0	0	0	0	0	0	0	0	0	0	7	0	0	0	0	0	0	0	0	0	0	0	3	Microperforates_Globigerinita_glutinata	Microperforates	Globigerinita	glutinata	-	JQ799900_Microperforates_Globigerinita_glutinata_IV_NA_NA;FJ643296_Microperforates_Globigerinita_glutinata_III_NA_NA;FJ643277_Microperforates_Globigerinita_glutinata_III_NA_NA;KM193199_Microperforates_Globigerinita_glutinata_NA_NA_NA;AY453136_Microperforates_Globigerinita_glutinata_III_NA_NA;	-	-	-	-	-
ISU295	1	4	NO	-	0	0	0	0	0	0	0	0	0	0	0	0	0	0	0	0	0	0	0	0	0	0	0	0	0	0	0	0	4	0	0	1	Non-Spinose_Neogloboquadrina_pachyderma_IV_NA_NA	Non-Spinose	Neogloboquadrina	pachyderma	IV	NAKM193680_Non-Spinose_Neogloboquadrina_pachyderma_IV_NA_NA;	-	-	-	-	-
ISU296	1	2	NO	-	0	0	0	0	0	0	0	0	0	0	0	0	0	0	0	0	0	0	0	2	0	0	0	0	0	0	0	0	0	0	0	1	Microperforates_Globigerinita_uvula	Microperforates	Globigerinita	uvula	-	KM193070_Microperforates_Globigerinita_uvula_NA_NA_NA;FJ643298_Microperforates_Globigerinita_uvula_I_NA_NA	-	-	-	-	-
ISU297	1	3	NO	-	0	0	0	0	0	0	0	0	0	0	3	0	0	0	0	0	0	0	0	0	0	0	0	0	0	0	0	0	0	0	0	1	Non-Spinose_Neogloboquadrina_pachyderma_I_NA_NA	Non-Spinose	Neogloboquadrina	pachyderma	I	NAAY305329_Non-Spinose_Neogloboquadrina_pachyderma_I_NA_NA;	-	-	-	-	-
ISU298	1	71	Yes	R-148_1_71_10	0	0	0	0	0	0	0	0	0	0	0	0	0	0	0	0	0	0	0	0	0	0	71	0	0	0	0	0	0	0	0	10	Non-Spinose_Globoquadrina_conglomerata_NA_NA_NA	Non-Spinose	Globoquadrina	conglomerata	NA	NAKJ633130_Non-Spinose_Globoquadrina_conglomerata_NA_NA_NA;KJ633133_Non-Spinose_Globoquadrina_conglomerata_NA_NA_NA	Unidentified	Globoquadrina	conglomerata	U1	Unidentified_Globoquadrina_conglomerata_U1
ISU299	1	2	NO	-	0	0	2	0	0	0	0	0	0	0	0	0	0	0	0	0	0	0	0	0	0	0	0	0	0	0	0	0	0	0	0	9	Non-Spiral_Galietelia_vivans_NA_NA_NA	Non-Spiral	Galietelia	vivans	NA	NAAB364519_Non-Spiral_Galietelia_vivans_NA_NA_NA;AB364517_Non-Spiral_Galietelia_vivans_NA_NA_NA;AB364518_Non-Spiral_Galietelia_vivans_NA_NA_NA;	-	-	-	-	-
ISU3	3	12	Yes	R-427_3_12_1	0	0	0	0	0	4	0	0	0	0	0	0	0	0	0	0	0	0	3	5	0	0	0	0	0	0	0	0	0	0	0	1	Microperforates_Globigerinita_glutinata_III_NA_NA	Microperforates	Globigerinita	glutinata	III	NAFJ643283_Microperforates_Globigerinita_glutinata_III_NA_NA;	Microperforates	Globigerinita	glutinata	III	Microperforates_Globigerinita_glutinata_III
ISU30	1	2	NO	-	0	0	0	0	0	2	0	0	0	0	0	0	0	0	0	0	0	0	0	0	0	0	0	0	0	0	0	0	0	0	0	10	Non-Spiral_Galietelia_vivans_NA_NA_NA	Non-Spiral	Galietelia	vivans	NA	NAAB364519_Non-Spiral_Galietelia_vivans_NA_NA_NA;AB364517_Non-Spiral_Galietelia_vivans_NA_NA_NA;AB364518_Non-Spiral_Galietelia_vivans_NA_NA_NA;	-	-	-	-	-
ISU300	2	5	Yes	R-641_2_5_1	0	0	0	0	0	0	0	0	0	0	0	0	0	0	0	0	0	0	2	3	0	0	0	0	0	0	0	0	0	0	0	1	Microperforates_Globigerinita_glutinata	Microperforates	Globigerinita	glutinata	-	AB468829_Microperforates_Globigerinita_glutinata_II_NA_NA;AB468827_Microperforates_Globigerinita_glutinata_II_NA_NA;FJ643418_Microperforates_Globigerinita_glutinata_NA_NA_NA;	Microperforates	Globigerinita	glutinata	II	Microperforates_Globigerinita_glutinata_II
ISU301	1	2	NO	-	0	0	0	0	0	0	0	0	0	0	0	0	0	0	0	0	0	0	0	0	0	2	0	0	0	0	0	0	0	0	0	1	Spinose_Globigerina_bulloides	Spinose	Globigerina	bulloides	-	GQ293072_Spinose_Globigerina_bulloides_I_c_NA;GU060421_Spinose_Globigerina_bulloides_I_e_NA;GQ293070_Spinose_Globigerina_bulloides_I_d_NA;Z83957_Spinose_Globigerina_bulloides_NA_NA_NA	-	-	-	-	-
ISU302	2	5	Yes	R-627_2_5_1	0	0	0	0	0	0	0	0	0	0	0	0	0	0	0	0	0	0	0	2	0	3	0	0	0	0	0	0	0	0	0	1	Microperforates_Globigerinita_glutinata_III_NA_NA	Microperforates	Globigerinita	glutinata	III	NAFJ643283_Microperforates_Globigerinita_glutinata_III_NA_NA;	Microperforates	Globigerinita	glutinata	III	Microperforates_Globigerinita_glutinata_III
ISU303	1	3	NO	-	0	0	0	0	0	0	0	0	0	0	0	0	0	0	0	0	0	0	0	3	0	0	0	0	0	0	0	0	0	0	0	4	Microperforates_Globigerinita_glutinata	Microperforates	Globigerinita	glutinata	-	JQ799900_Microperforates_Globigerinita_glutinata_IV_NA_NA;FJ643296_Microperforates_Globigerinita_glutinata_III_NA_NA;FJ643277_Microperforates_Globigerinita_glutinata_III_NA_NA;KM193199_Microperforates_Globigerinita_glutinata_NA_NA_NA;AY453136_Microperforates_Globigerinita_glutinata_III_NA_NA;	-	-	-	-	-
ISU304	2	15	Yes	R-375_2_15_1	0	0	0	0	0	0	0	0	0	0	12	3	0	0	0	0	0	0	0	0	0	0	0	0	0	0	0	0	0	0	0	1	Non-Spinose_Neogloboquadrina_pachyderma_I_NA_NA	Non-Spinose	Neogloboquadrina	pachyderma	I	NAAY305329_Non-Spinose_Neogloboquadrina_pachyderma_I_NA_NA;	Non-Spinose	Neogloboquadrina	pachyderma	I	Non-Spinose_Neogloboquadrina_pachyderma_I
ISU305	1	2	NO	-	0	0	0	0	0	0	0	0	0	0	0	0	0	0	0	0	0	0	0	0	0	2	0	0	0	0	0	0	0	0	0	1	Microperforates_Candeina_nitida_NA_NA_NA	Microperforates	Candeina	nitida	NA	NAAB263435_Microperforates_Candeina_nitida_NA_NA_NA;	-	-	-	-	-
ISU306	1	5	NO	-	0	0	0	0	0	0	0	0	0	0	0	0	0	0	0	0	0	0	0	0	0	0	0	0	0	0	0	0	5	0	0	1	Non-Spinose_Neogloboquadrina_pachyderma_IV_NA_NA	Non-Spinose	Neogloboquadrina	pachyderma	IV	NAKM193680_Non-Spinose_Neogloboquadrina_pachyderma_IV_NA_NA;	-	-	-	-	-
ISU307	1	2	NO	-	0	0	0	0	0	2	0	0	0	0	0	0	0	0	0	0	0	0	0	0	0	0	0	0	0	0	0	0	0	0	0	2	Microperforates_Globigerinita_glutinata	Microperforates	Globigerinita	glutinata	-	JQ799900_Microperforates_Globigerinita_glutinata_IV_NA_NA;FJ643296_Microperforates_Globigerinita_glutinata_III_NA_NA;FJ643277_Microperforates_Globigerinita_glutinata_III_NA_NA;KM193199_Microperforates_Globigerinita_glutinata_NA_NA_NA;AY453136_Microperforates_Globigerinita_glutinata_III_NA_NA;	-	-	-	-	-
ISU308	5	29	Yes	R-265_5_29_1	0	0	0	0	2	6	0	0	0	0	0	0	0	0	0	0	0	0	2	11	0	8	0	0	0	0	0	0	0	0	0	1	Microperforates_Globigerinita_glutinata	Microperforates	Globigerinita	glutinata	-	FJ643296_Microperforates_Globigerinita_glutinata_III_NA_NA;KM193199_Microperforates_Globigerinita_glutinata_NA_NA_NA;FJ643277_Microperforates_Globigerinita_glutinata_III_NA_NA;AY453136_Microperforates_Globigerinita_glutinata_III_NA_NA;JQ799900_Microperforates_Globigerinita_glutinata_IV_NA_NA;	Microperforates	Globigerinita	glutinata	III	Microperforates_Globigerinita_glutinata_III
ISU309	1	2	NO	-	0	0	0	0	0	0	0	0	0	0	0	0	0	0	0	0	2	0	0	0	0	0	0	0	0	0	0	0	0	0	0	1	Microperforates_Globigerinita_uvula	Microperforates	Globigerinita	uvula	-	KM193181_Microperforates_Globigerinita_uvula_NA_NA_NA;KM193364_Microperforates_Globigerinita_uvula_NA_NA_NA;AF387173_Microperforates_Globigerinita_uvula_II_NA_NA;KM194324_Microperforates_Globigerinita_uvula_NA_NA_NA;KM193691_Microperforates_Globigerinita_uvula_NA_NA_NA;	-	-	-	-	-
ISU31	1	2	NO	-	0	0	0	0	0	2	0	0	0	0	0	0	0	0	0	0	0	0	0	0	0	0	0	0	0	0	0	0	0	0	0	1	Microperforates_Globigerinita_glutinata	Microperforates	Globigerinita	glutinata	-	JQ799900_Microperforates_Globigerinita_glutinata_IV_NA_NA;FJ643296_Microperforates_Globigerinita_glutinata_III_NA_NA;KM193199_Microperforates_Globigerinita_glutinata_NA_NA_NA;AY453136_Microperforates_Globigerinita_glutinata_III_NA_NA	-	-	-	-	-
ISU310	2	6	Yes	R-554_2_6_0	0	0	0	0	0	0	0	0	0	0	0	0	0	0	0	0	0	0	0	4	0	2	0	0	0	0	0	0	0	0	0	0	Microperforates_Candeina_nitida_NA_NA_NA	Microperforates	Candeina	nitida	NA	NAAB468837_Microperforates_Candeina_nitida_NA_NA_NA;	Microperforates	Globigerinita	glutinata	III	Microperforates_Globigerinita_glutinata_III
ISU311	5	50	Yes	R-185_5_50_1	0	0	0	0	5	13	0	0	0	0	0	0	0	0	0	0	0	0	4	11	0	17	0	0	0	0	0	0	0	0	0	1	Microperforates_Globigerinita_glutinata	Microperforates	Globigerinita	glutinata	-	FJ643296_Microperforates_Globigerinita_glutinata_III_NA_NA;KM193199_Microperforates_Globigerinita_glutinata_NA_NA_NA;FJ643277_Microperforates_Globigerinita_glutinata_III_NA_NA;AY453136_Microperforates_Globigerinita_glutinata_III_NA_NA;JQ799900_Microperforates_Globigerinita_glutinata_IV_NA_NA;	Microperforates	Globigerinita	glutinata	III	Microperforates_Globigerinita_glutinata_III
ISU312	1	2	NO	-	0	0	0	0	0	0	0	0	0	0	0	0	0	0	0	0	0	0	0	2	0	0	0	0	0	0	0	0	0	0	0	1	Microperforates_Candeina_nitida_NA_NA_NA	Microperforates	Candeina	nitida	NA	NAAB263435_Microperforates_Candeina_nitida_NA_NA_NA;	-	-	-	-	-
ISU313	1	2	NO	-	0	0	0	0	0	0	0	0	0	0	0	0	0	0	0	0	0	0	0	2	0	0	0	0	0	0	0	0	0	0	0	2	Microperforates_Globigerinita_glutinata_III_NA_NA	Microperforates	Globigerinita	glutinata	III	NAFJ643283_Microperforates_Globigerinita_glutinata_III_NA_NA;	-	-	-	-	-
ISU314	4	24	Yes	R-296_4_24_1	0	0	0	0	0	7	0	0	0	0	0	0	0	0	0	0	0	0	2	8	0	7	0	0	0	0	0	0	0	0	0	1	Microperforates_Globigerinita_glutinata_III_NA_NA	Microperforates	Globigerinita	glutinata	III	NAFJ643283_Microperforates_Globigerinita_glutinata_III_NA_NA;	Microperforates	Globigerinita	glutinata	III	Microperforates_Globigerinita_glutinata_III
ISU315	1	41	Yes	R-220_1_41_2	0	0	0	0	0	41	0	0	0	0	0	0	0	0	0	0	0	0	0	0	0	0	0	0	0	0	0	0	0	0	0	2	Microperforates_Globigerinita_glutinata	Microperforates	Globigerinita	glutinata	-	JQ799900_Microperforates_Globigerinita_glutinata_IV_NA_NA;FJ643296_Microperforates_Globigerinita_glutinata_III_NA_NA;FJ643277_Microperforates_Globigerinita_glutinata_III_NA_NA;KM193199_Microperforates_Globigerinita_glutinata_NA_NA_NA;AY453136_Microperforates_Globigerinita_glutinata_III_NA_NA;	Microperforates	Globigerinita	glutinata	III	Microperforates_Globigerinita_glutinata_III
ISU316	2	8	Yes	R-490_2_8_8	0	0	4	4	0	0	0	0	0	0	0	0	0	0	0	0	0	0	0	0	0	0	0	0	0	0	0	0	0	0	0	8	Non-Spiral_Galietelia_vivans_NA_NA_NA	Non-Spiral	Galietelia	vivans	NA	NAAB364519_Non-Spiral_Galietelia_vivans_NA_NA_NA;AB364517_Non-Spiral_Galietelia_vivans_NA_NA_NA;AB364518_Non-Spiral_Galietelia_vivans_NA_NA_NA;	Unidentified	Gallitellia	vivans	U1	Unidentified_Gallitellia_vivans_U1
ISU317	1	194	Yes	R-80_1_194_6	0	0	0	0	0	0	0	0	0	0	0	0	0	0	0	0	0	0	0	0	0	194	0	0	0	0	0	0	0	0	0	6	Microperforates_Candeina_nitida_NA_NA_NA	Microperforates	Candeina	nitida	NA	NAAB468837_Microperforates_Candeina_nitida_NA_NA_NA;AB468836_Microperforates_Candeina_nitida_NA_NA_NA;KJ633212_Microperforates_Candeina_nitida_NA_NA_NA;AB263435_Microperforates_Candeina_nitida_NA_NA_NA	Microperforates	Candeina	nitida	U1	Microperforates_Candeina_nitida_U1
ISU318	1	4	NO	-	0	0	0	0	0	0	0	0	0	0	0	0	0	0	0	0	0	0	0	4	0	0	0	0	0	0	0	0	0	0	0	6	Microperforates_Globigerinita_uvula	Microperforates	Globigerinita	uvula	-	FJ643298_Microperforates_Globigerinita_uvula_I_NA_NA;KM193160_Microperforates_Globigerinita_uvula_NA_NA_NA;KM193075_Microperforates_Globigerinita_uvula_NA_NA_NA;KM193070_Microperforates_Globigerinita_uvula_NA_NA_NA;KM193079_Microperforates_Globigerinita_uvula_NA_NA_NA;	-	-	-	-	-
ISU319	2	4	Yes	R-681_2_4_1	0	0	0	0	2	0	0	0	0	0	0	0	0	0	0	0	0	0	0	2	0	0	0	0	0	0	0	0	0	0	0	1	Microperforates_Globigerinita_glutinata	Microperforates	Globigerinita	glutinata	-	FJ643296_Microperforates_Globigerinita_glutinata_III_NA_NA;KM193199_Microperforates_Globigerinita_glutinata_NA_NA_NA;FJ643277_Microperforates_Globigerinita_glutinata_III_NA_NA;AY453136_Microperforates_Globigerinita_glutinata_III_NA_NA;JQ799900_Microperforates_Globigerinita_glutinata_IV_NA_NA;	Microperforates	Globigerinita	glutinata	III	Microperforates_Globigerinita_glutinata_III
ISU32	1	6	NO	-	0	0	0	0	0	0	0	0	0	0	0	0	0	0	0	0	0	0	0	0	0	0	0	0	0	0	0	0	6	0	0	1	Non-Spinose_Neogloboquadrina_pachyderma_IV_NA_NA	Non-Spinose	Neogloboquadrina	pachyderma	IV	NAKM193680_Non-Spinose_Neogloboquadrina_pachyderma_IV_NA_NA;	-	-	-	-	-
ISU320	4	52	Yes	R-180_4_52_1	0	0	0	0	0	9	0	0	0	0	0	0	0	0	0	0	0	0	10	17	0	16	0	0	0	0	0	0	0	0	0	1	Microperforates_Globigerinita_glutinata	Microperforates	Globigerinita	glutinata	-	AY453136_Microperforates_Globigerinita_glutinata_III_NA_NA;KM193199_Microperforates_Globigerinita_glutinata_NA_NA_NA;JQ799900_Microperforates_Globigerinita_glutinata_IV_NA_NA;	Microperforates	Globigerinita	glutinata	III	Microperforates_Globigerinita_glutinata_III
ISU321	2	6	Yes	R-586_2_6_1	0	0	0	0	0	2	0	0	0	0	0	0	0	0	0	0	0	0	0	4	0	0	0	0	0	0	0	0	0	0	0	1	Microperforates_Candeina_nitida_NA_NA_NA	Microperforates	Candeina	nitida	NA	NAAB263435_Microperforates_Candeina_nitida_NA_NA_NA;	Microperforates	Candeina	nitida	I	Microperforates_Candeina_nitida_I
ISU322	4	13	Yes	R-408_4_13_1	0	0	0	0	0	4	0	0	0	0	0	0	0	0	0	0	0	0	2	4	0	3	0	0	0	0	0	0	0	0	0	1	Microperforates_Globigerinita_glutinata	Microperforates	Globigerinita	glutinata	-	JQ799900_Microperforates_Globigerinita_glutinata_IV_NA_NA;FJ643296_Microperforates_Globigerinita_glutinata_III_NA_NA;KM193199_Microperforates_Globigerinita_glutinata_NA_NA_NA;AY453136_Microperforates_Globigerinita_glutinata_III_NA_NA	Microperforates	Globigerinita	glutinata	III	Microperforates_Globigerinita_glutinata_III
ISU323	1	5	NO	-	0	0	0	0	0	0	0	0	0	0	0	0	0	0	0	0	0	0	0	0	0	5	0	0	0	0	0	0	0	0	0	4	Microperforates_Globigerinita_uvula	Microperforates	Globigerinita	uvula	-	KM193079_Microperforates_Globigerinita_uvula_NA_NA_NA;KM193160_Microperforates_Globigerinita_uvula_NA_NA_NA;FJ643298_Microperforates_Globigerinita_uvula_I_NA_NA;KM193075_Microperforates_Globigerinita_uvula_NA_NA_NA;KM193070_Microperforates_Globigerinita_uvula_NA_NA_NA;	-	-	-	-	-
ISU324	1	3	NO	-	0	0	0	0	0	0	0	0	0	0	0	0	0	0	0	0	0	0	0	3	0	0	0	0	0	0	0	0	0	0	0	1	Microperforates_Candeina_nitida_NA_NA_NA	Microperforates	Candeina	nitida	NA	NAAB263435_Microperforates_Candeina_nitida_NA_NA_NA;	-	-	-	-	-
ISU325	2	6	Yes	R-597_2_6_4	0	0	0	0	2	0	0	0	0	0	0	0	0	0	0	0	0	0	0	0	0	4	0	0	0	0	0	0	0	0	0	4	Microperforates_Globigerinita_glutinata	Microperforates	Globigerinita	glutinata	-	KM193484_Microperforates_Globigerinita_glutinata_NA_NA_NA;FJ643286_Microperforates_Globigerinita_glutinata_I_NA_NA	Microperforates	Globigerinita	glutinata	I	Microperforates_Globigerinita_glutinata_I
ISU326	3	9	Yes	R-480_3_9_1	0	0	0	0	0	0	0	0	0	3	4	0	0	0	0	0	0	0	0	0	0	0	0	0	0	2	0	0	0	0	0	1	Non-Spinose_Neogloboquadrina_pachyderma_I_NA_NA	Non-Spinose	Neogloboquadrina	pachyderma	I	NAAY305329_Non-Spinose_Neogloboquadrina_pachyderma_I_NA_NA;	Non-Spinose	Neogloboquadrina	pachyderma	I	Non-Spinose_Neogloboquadrina_pachyderma_I
ISU327	1	4	NO	-	0	0	0	0	0	0	0	0	0	0	0	0	0	0	0	0	0	0	0	4	0	0	0	0	0	0	0	0	0	0	0	8	Microperforates_Globigerinita_glutinata	Microperforates	Globigerinita	glutinata	-	JQ799900_Microperforates_Globigerinita_glutinata_IV_NA_NA;FJ643288_Microperforates_Globigerinita_glutinata_I_NA_NA;KM193539_Microperforates_Globigerinita_glutinata_NA_NA_NA;FJ643296_Microperforates_Globigerinita_glutinata_III_NA_NA;FJ643277_Microperforates_Globigerinita_glutinata_III_NA_NA;KM193303_Microperforates_Globigerinita_glutinata_NA_NA_NA;KM193199_Microperforates_Globigerinita_glutinata_N…	-	-	-	-	-
ISU328	1	3	NO	-	0	0	0	0	0	3	0	0	0	0	0	0	0	0	0	0	0	0	0	0	0	0	0	0	0	0	0	0	0	0	0	3	Microperforates_Globigerinita_glutinata	Microperforates	Globigerinita	glutinata	-	FJ643286_Microperforates_Globigerinita_glutinata_I_NA_NA;KM193484_Microperforates_Globigerinita_glutinata_NA_NA_NA	-	-	-	-	-
ISU329	1	3	NO	-	0	0	0	0	0	0	0	0	0	0	0	0	0	0	0	0	0	0	3	0	0	0	0	0	0	0	0	0	0	0	0	5	Microperforates_Globigerinita_uvula	Microperforates	Globigerinita	uvula	-	FJ643298_Microperforates_Globigerinita_uvula_I_NA_NA;KM193070_Microperforates_Globigerinita_uvula_NA_NA_NA;KM193079_Microperforates_Globigerinita_uvula_NA_NA_NA;	-	-	-	-	-
ISU33	5	29	Yes	R-268_5_29_1	0	0	0	0	3	11	0	0	0	0	0	0	0	0	0	0	0	0	7	3	0	5	0	0	0	0	0	0	0	0	0	1	Microperforates_Globigerinita_glutinata	Microperforates	Globigerinita	glutinata	-	FJ643296_Microperforates_Globigerinita_glutinata_III_NA_NA;AY453136_Microperforates_Globigerinita_glutinata_III_NA_NA;KM193199_Microperforates_Globigerinita_glutinata_NA_NA_NA;JQ799900_Microperforates_Globigerinita_glutinata_IV_NA_NA	Microperforates	Globigerinita	glutinata	III	Microperforates_Globigerinita_glutinata_III
ISU330	2	6	Yes	R-563_2_6_1	0	0	0	0	0	2	0	0	0	0	0	0	0	0	0	0	0	0	0	0	0	4	0	0	0	0	0	0	0	0	0	1	Spinose_Globigerina_bulloides	Spinose	Globigerina	bulloides	-	Z83957_Spinose_Globigerina_bulloides_NA_NA_NA;GQ293072_Spinose_Globigerina_bulloides_I_c_NA;GQ293070_Spinose_Globigerina_bulloides_I_d_NA;GU060421_Spinose_Globigerina_bulloides_I_e_NA	Spinose	Globigerina	bulloides	I	Spinose_Globigerina_bulloides_I
ISU331	1	2	NO	-	0	0	0	0	0	0	0	0	0	0	0	0	0	0	0	0	0	0	2	0	0	0	0	0	0	0	0	0	0	0	0	1	Microperforates_Candeina_nitida_NA_NA_NA	Microperforates	Candeina	nitida	NA	NAAB263435_Microperforates_Candeina_nitida_NA_NA_NA;	-	-	-	-	-
ISU332	2	5	Yes	R-623_2_5_1	0	0	0	0	0	0	0	0	0	0	3	0	0	0	0	0	0	0	0	0	0	0	0	0	0	2	0	0	0	0	0	1	Non-Spinose_Neogloboquadrina_pachyderma_I_NA_NA	Non-Spinose	Neogloboquadrina	pachyderma	I	NAAY305329_Non-Spinose_Neogloboquadrina_pachyderma_I_NA_NA;	Non-Spinose	Neogloboquadrina	pachyderma	I	Non-Spinose_Neogloboquadrina_pachyderma_I
ISU333	9	9717	Yes	R-9_9_9717_6	0	0	0	187	2233	3154	0	0	2	0	2	0	0	0	0	0	0	0	883	1472	0	1779	5	0	0	0	0	0	0	0	0	6	Microperforates_Globigerinita_uvula	Microperforates	Globigerinita	uvula	-	FJ643298_Microperforates_Globigerinita_uvula_I_NA_NA;KM193070_Microperforates_Globigerinita_uvula_NA_NA_NA;KM193079_Microperforates_Globigerinita_uvula_NA_NA_NA;	Microperforates	Globigerinita	uvula	I	Microperforates_Globigerinita_uvula_I
ISU334	4	22	Yes	R-315_4_22_1	0	0	0	0	3	15	0	0	0	0	0	0	0	0	0	0	0	0	2	2	0	0	0	0	0	0	0	0	0	0	0	1	Microperforates_Globigerinita_glutinata_III_NA_NA	Microperforates	Globigerinita	glutinata	III	NAFJ643283_Microperforates_Globigerinita_glutinata_III_NA_NA;	Microperforates	Globigerinita	glutinata	III	Microperforates_Globigerinita_glutinata_III
ISU335	1	2	NO	-	0	0	0	0	2	0	0	0	0	0	0	0	0	0	0	0	0	0	0	0	0	0	0	0	0	0	0	0	0	0	0	7	Microperforates_Globigerinita_uvula	Microperforates	Globigerinita	uvula	-	FJ643298_Microperforates_Globigerinita_uvula_I_NA_NA;KM193160_Microperforates_Globigerinita_uvula_NA_NA_NA;KM193079_Microperforates_Globigerinita_uvula_NA_NA_NA;KM193075_Microperforates_Globigerinita_uvula_NA_NA_NA;KM193070_Microperforates_Globigerinita_uvula_NA_NA_NA;	-	-	-	-	-
ISU336	1	111	Yes	R-111_1_111_0	0	0	0	0	111	0	0	0	0	0	0	0	0	0	0	0	0	0	0	0	0	0	0	0	0	0	0	0	0	0	0	0	Spinose_Orbulina_universa_III_NA_NA	Spinose	Orbulina	universa	III	NAAB263456_Spinose_Orbulina_universa_III_NA_NA;KM193652_Spinose_Orbulina_universa_III_NA_NA	Spinose	Orbulina	universa	III	Spinose_Orbulina_universa_III
ISU337	2	4	Yes	R-651_2_4_3	0	0	0	0	0	2	0	0	0	0	0	0	0	0	0	0	0	0	0	0	0	2	0	0	0	0	0	0	0	0	0	3	Microperforates_Globigerinita_glutinata	Microperforates	Globigerinita	glutinata	-	FJ643294_Microperforates_Globigerinita_glutinata_I_NA_NA;KM193497_Microperforates_Globigerinita_glutinata_NA_NA_NA;FJ643283_Microperforates_Globigerinita_glutinata_III_NA_NA;KM193151_Microperforates_Globigerinita_glutinata_NA_NA_NA	Microperforates	Globigerinita	uvula	I	Microperforates_Globigerinita_uvula_I
ISU338	1	3	NO	-	0	0	0	0	0	0	0	0	0	0	0	0	0	0	0	0	0	0	0	0	0	0	0	0	0	0	0	0	3	0	0	1	Non-Spinose_Neogloboquadrina_pachyderma_IV_NA_NA	Non-Spinose	Neogloboquadrina	pachyderma	IV	NAKM193550_Non-Spinose_Neogloboquadrina_pachyderma_IV_NA_NA;KM193530_Non-Spinose_Neogloboquadrina_pachyderma_IV_NA_NA;KM193284_Non-Spinose_Neogloboquadrina_pachyderma_IV_NA_NA;KM193861_Non-Spinose_Neogloboquadrina_pachyderma_IV_NA_NA;KM193614_Non-Spinose_Neogloboquadrina_pachyderma_IV_NA_NA;KM193889_Non-Spinose_Neogloboquadrina_pachyderma_IV_NA_NA;KM193556_Non-Spinose_Neogloboquadrina_pachyderma_…	-	-	-	-	-
ISU339	1	7	NO	-	7	0	0	0	0	0	0	0	0	0	0	0	0	0	0	0	0	0	0	0	0	0	0	0	0	0	0	0	0	0	0	2	Microperforates_Globigerinita_uvula_NA_NA_NA	Microperforates	Globigerinita	uvula	NA	NAKM193324_Microperforates_Globigerinita_uvula_NA_NA_NA;	-	-	-	-	-
ISU34	4	709	Yes	R-30_4_709_1	0	0	0	0	0	54	0	0	0	0	0	0	0	0	0	0	0	0	7	640	0	8	0	0	0	0	0	0	0	0	0	1	Microperforates_Globigerinita_glutinata	Microperforates	Globigerinita	glutinata	-	JQ799900_Microperforates_Globigerinita_glutinata_IV_NA_NA;FJ643296_Microperforates_Globigerinita_glutinata_III_NA_NA;KM193199_Microperforates_Globigerinita_glutinata_NA_NA_NA;AY453136_Microperforates_Globigerinita_glutinata_III_NA_NA	Microperforates	Globigerinita	glutinata	III	Microperforates_Globigerinita_glutinata_III
ISU340	2	14	Yes	R-399_2_14_1	0	0	0	0	0	12	0	0	0	0	0	0	0	0	0	0	0	0	0	0	0	2	0	0	0	0	0	0	0	0	0	1	Microperforates_Globigerinita_glutinata_III_NA_NA	Microperforates	Globigerinita	glutinata	III	NAFJ643296_Microperforates_Globigerinita_glutinata_III_NA_NA;	Microperforates	Globigerinita	glutinata	III	Microperforates_Globigerinita_glutinata_III
ISU341	1	2	NO	-	0	0	0	0	0	2	0	0	0	0	0	0	0	0	0	0	0	0	0	0	0	0	0	0	0	0	0	0	0	0	0	2	Microperforates_Globigerinita_glutinata	Microperforates	Globigerinita	glutinata	-	FJ643294_Microperforates_Globigerinita_glutinata_I_NA_NA;KM193497_Microperforates_Globigerinita_glutinata_NA_NA_NA;FJ643283_Microperforates_Globigerinita_glutinata_III_NA_NA;KM193151_Microperforates_Globigerinita_glutinata_NA_NA_NA	-	-	-	-	-
ISU342	1	5	NO	-	0	0	0	0	0	0	0	0	0	0	0	0	0	0	0	0	0	0	0	0	0	0	0	0	0	0	0	0	5	0	0	1	Non-Spinose_Neogloboquadrina_pachyderma_IV_NA_NA	Non-Spinose	Neogloboquadrina	pachyderma	IV	NAKM193680_Non-Spinose_Neogloboquadrina_pachyderma_IV_NA_NA;	-	-	-	-	-
ISU343	5	83	Yes	R-137_5_83_1	0	0	0	0	9	25	0	0	0	0	0	0	0	0	0	0	0	0	17	19	0	13	0	0	0	0	0	0	0	0	0	1	Microperforates_Globigerinita_glutinata_III_NA_NA	Microperforates	Globigerinita	glutinata	III	NAFJ643283_Microperforates_Globigerinita_glutinata_III_NA_NA;	Microperforates	Globigerinita	glutinata	III	Microperforates_Globigerinita_glutinata_III
ISU344	1	2	NO	-	0	0	0	0	2	0	0	0	0	0	0	0	0	0	0	0	0	0	0	0	0	0	0	0	0	0	0	0	0	0	0	2	Microperforates_Globigerinita_uvula	Microperforates	Globigerinita	uvula	-	FJ643298_Microperforates_Globigerinita_uvula_I_NA_NA;KM193070_Microperforates_Globigerinita_uvula_NA_NA_NA;KM193079_Microperforates_Globigerinita_uvula_NA_NA_NA;	-	-	-	-	-
ISU345	3	21	Yes	R-321_3_21_1	0	0	0	0	0	0	0	0	0	3	11	7	0	0	0	0	0	0	0	0	0	0	0	0	0	0	0	0	0	0	0	1	Non-Spinose_Neogloboquadrina_pachyderma_I_NA_NA	Non-Spinose	Neogloboquadrina	pachyderma	I	NAAY305329_Non-Spinose_Neogloboquadrina_pachyderma_I_NA_NA;	Non-Spinose	Neogloboquadrina	pachyderma	I	Non-Spinose_Neogloboquadrina_pachyderma_I
ISU346	1	2	NO	-	0	0	0	0	0	0	0	0	0	0	0	0	2	0	0	0	0	0	0	0	0	0	0	0	0	0	0	0	0	0	0	1	Spinose_Globigerina_bulloides_II_c_NA	Spinose	Globigerina	bulloides	II	cAF250111_Spinose_Globigerina_bulloides_II_c_NA;	-	-	-	-	-
ISU347	2	21	Yes	R-320_2_21_1	0	0	0	0	0	0	0	0	0	0	0	0	0	0	2	0	0	0	0	0	0	0	0	0	0	0	0	0	19	0	0	1	Non-Spinose_Neogloboquadrina_pachyderma_IV_NA_NA	Non-Spinose	Neogloboquadrina	pachyderma	IV	NAKM193490_Non-Spinose_Neogloboquadrina_pachyderma_IV_NA_NA;KM193530_Non-Spinose_Neogloboquadrina_pachyderma_IV_NA_NA;KM193551_Non-Spinose_Neogloboquadrina_pachyderma_IV_NA_NA;KM193565_Non-Spinose_Neogloboquadrina_pachyderma_IV_NA_NA;KM193614_Non-Spinose_Neogloboquadrina_pachyderma_IV_NA_NA;KM193861_Non-Spinose_Neogloboquadrina_pachyderma_IV_NA_NA;KM193569_Non-Spinose_Neogloboquadrina_pachyderma_…	Non-Spinose	Neogloboquadrina	pachyderma	IV	Non-Spinose_Neogloboquadrina_pachyderma_IV
ISU348	1	2	NO	-	0	0	0	0	0	0	0	0	0	0	0	0	2	0	0	0	0	0	0	0	0	0	0	0	0	0	0	0	0	0	0	5	Non-Spinose_Globoquadrina_conglomerata_NA_NA_NA	Non-Spinose	Globoquadrina	conglomerata	NA	NAKM193124_Non-Spinose_Globoquadrina_conglomerata_NA_NA_NA;KM193106_Non-Spinose_Globoquadrina_conglomerata_NA_NA_NA;KM193115_Non-Spinose_Globoquadrina_conglomerata_NA_NA_NA;KM193112_Non-Spinose_Globoquadrina_conglomerata_NA_NA_NA;KM193104_Non-Spinose_Globoquadrina_conglomerata_NA_NA_NA;KM193119_Non-Spinose_Globoquadrina_conglomerata_NA_NA_NA;KM193114_Non-Spinose_Globoquadrina_conglomerata_NA_NA_N…	-	-	-	-	-
ISU349	1	4	NO	-	4	0	0	0	0	0	0	0	0	0	0	0	0	0	0	0	0	0	0	0	0	0	0	0	0	0	0	0	0	0	0	1	Microperforates_Globigerinita_uvula	Microperforates	Globigerinita	uvula	-	KM193181_Microperforates_Globigerinita_uvula_NA_NA_NA;KM193691_Microperforates_Globigerinita_uvula_NA_NA_NA;KM193364_Microperforates_Globigerinita_uvula_NA_NA_NA;AF387173_Microperforates_Globigerinita_uvula_II_NA_NA;KM194324_Microperforates_Globigerinita_uvula_NA_NA_NA;	-	-	-	-	-
ISU35	1	2	NO	-	0	0	0	0	0	0	0	0	0	0	0	0	0	0	0	0	0	0	0	2	0	0	0	0	0	0	0	0	0	0	0	2	Microperforates_Globigerinita_glutinata	Microperforates	Globigerinita	glutinata	-	JQ799900_Microperforates_Globigerinita_glutinata_IV_NA_NA;FJ643296_Microperforates_Globigerinita_glutinata_III_NA_NA;KM193199_Microperforates_Globigerinita_glutinata_NA_NA_NA;AY453136_Microperforates_Globigerinita_glutinata_III_NA_NA	-	-	-	-	-
ISU350	3	6	Yes	R-600_3_6_1	0	0	0	0	0	2	0	0	0	0	0	0	0	0	0	0	0	0	0	2	0	2	0	0	0	0	0	0	0	0	0	1	Microperforates_Globigerinita_glutinata_III_NA_NA	Microperforates	Globigerinita	glutinata	III	NAFJ643283_Microperforates_Globigerinita_glutinata_III_NA_NA;	Microperforates	Globigerinita	glutinata	III	Microperforates_Globigerinita_glutinata_III
ISU351	1	2	NO	-	0	0	0	0	0	0	0	0	0	0	0	0	0	0	0	0	0	0	0	0	0	0	0	0	0	0	0	0	2	0	0	1	Non-Spinose_Neogloboquadrina_pachyderma_IV_NA_NA	Non-Spinose	Neogloboquadrina	pachyderma	IV	NAKM193550_Non-Spinose_Neogloboquadrina_pachyderma_IV_NA_NA;KM193530_Non-Spinose_Neogloboquadrina_pachyderma_IV_NA_NA;KM193284_Non-Spinose_Neogloboquadrina_pachyderma_IV_NA_NA;KM193861_Non-Spinose_Neogloboquadrina_pachyderma_IV_NA_NA;KM193614_Non-Spinose_Neogloboquadrina_pachyderma_IV_NA_NA;KM193889_Non-Spinose_Neogloboquadrina_pachyderma_IV_NA_NA;KM193556_Non-Spinose_Neogloboquadrina_pachyderma_…	-	-	-	-	-
ISU352	5	35	Yes	R-242_5_35_1	0	0	0	0	3	5	0	0	0	0	0	0	0	0	0	0	0	0	6	12	0	9	0	0	0	0	0	0	0	0	0	1	Microperforates_Globigerinita_glutinata	Microperforates	Globigerinita	glutinata	-	FJ643296_Microperforates_Globigerinita_glutinata_III_NA_NA;KM193199_Microperforates_Globigerinita_glutinata_NA_NA_NA;FJ643277_Microperforates_Globigerinita_glutinata_III_NA_NA;AY453136_Microperforates_Globigerinita_glutinata_III_NA_NA;JQ799900_Microperforates_Globigerinita_glutinata_IV_NA_NA;	Microperforates	Globigerinita	glutinata	III	Microperforates_Globigerinita_glutinata_III
ISU353	1	2	NO	-	0	0	0	0	0	2	0	0	0	0	0	0	0	0	0	0	0	0	0	0	0	0	0	0	0	0	0	0	0	0	0	4	Microperforates_Globigerinita_glutinata	Microperforates	Globigerinita	glutinata	-	FJ643286_Microperforates_Globigerinita_glutinata_I_NA_NA;KM193484_Microperforates_Globigerinita_glutinata_NA_NA_NA	-	-	-	-	-
ISU354	1	4	NO	-	0	0	0	0	4	0	0	0	0	0	0	0	0	0	0	0	0	0	0	0	0	0	0	0	0	0	0	0	0	0	0	2	Microperforates_Globigerinita_uvula	Microperforates	Globigerinita	uvula	-	FJ643298_Microperforates_Globigerinita_uvula_I_NA_NA;KM193070_Microperforates_Globigerinita_uvula_NA_NA_NA;KM193079_Microperforates_Globigerinita_uvula_NA_NA_NA;	-	-	-	-	-
ISU355	1	2	NO	-	0	0	0	0	0	0	0	0	0	0	0	0	0	0	0	0	0	0	0	2	0	0	0	0	0	0	0	0	0	0	0	5	Microperforates_Globigerinita_glutinata	Microperforates	Globigerinita	glutinata	-	JQ799900_Microperforates_Globigerinita_glutinata_IV_NA_NA;FJ643288_Microperforates_Globigerinita_glutinata_I_NA_NA;KM193539_Microperforates_Globigerinita_glutinata_NA_NA_NA;FJ643296_Microperforates_Globigerinita_glutinata_III_NA_NA;FJ643277_Microperforates_Globigerinita_glutinata_III_NA_NA;KM193303_Microperforates_Globigerinita_glutinata_NA_NA_NA;KM193199_Microperforates_Globigerinita_glutinata_N…	-	-	-	-	-
ISU356	2	10	Yes	R-463_2_10_1	0	0	0	0	0	0	0	0	0	0	0	0	0	0	0	0	0	0	3	0	0	7	0	0	0	0	0	0	0	0	0	1	Microperforates_Globigerinita_glutinata_III_NA_NA	Microperforates	Globigerinita	glutinata	III	NAFJ643277_Microperforates_Globigerinita_glutinata_III_NA_NA;	Microperforates	Globigerinita	glutinata	III	Microperforates_Globigerinita_glutinata_III
ISU357	1	2	NO	-	0	0	0	0	0	2	0	0	0	0	0	0	0	0	0	0	0	0	0	0	0	0	0	0	0	0	0	0	0	0	0	1	Monolamellar_Hastigerina_pelagica	Monolamellar	Hastigerina	pelagica	-	FJ643408_Monolamellar_Hastigerina_pelagica_II_a_NA;KM194103_Monolamellar_Hastigerina_pelagica_NA_NA_NA;FJ643367_Monolamellar_Hastigerina_pelagica_II_a_NA;FJ643402_Monolamellar_Hastigerina_pelagica_NA_NA_NA	-	-	-	-	-
ISU358	2	95	Yes	R-126_2_95_0	0	0	0	73	0	22	0	0	0	0	0	0	0	0	0	0	0	0	0	0	0	0	0	0	0	0	0	0	0	0	0	0	Non-Spinose_Globorotalia_inflata	Non-Spinose	Globorotalia	inflata	-	KJ633233_Non-Spinose_Globorotalia_inflata_I_NA_NA;KM194580_Non-Spinose_Globorotalia_inflata_NA_NA_NA;KM194291_Non-Spinose_Globorotalia_inflata_NA_NA_NA;KM194410_Non-Spinose_Globorotalia_inflata_NA_NA_NA	Non-Spinose	Globorotalia	inflata	I	Non-Spinose_Globorotalia_inflata_I
ISU359	4	28	Yes	R-271_4_28_1	0	0	0	0	0	4	0	0	0	0	0	0	0	0	0	0	0	0	7	11	0	6	0	0	0	0	0	0	0	0	0	1	Microperforates_Globigerinita_glutinata	Microperforates	Globigerinita	glutinata	-	JQ799900_Microperforates_Globigerinita_glutinata_IV_NA_NA;FJ643296_Microperforates_Globigerinita_glutinata_III_NA_NA;KM193199_Microperforates_Globigerinita_glutinata_NA_NA_NA;AY453136_Microperforates_Globigerinita_glutinata_III_NA_NA	Microperforates	Globigerinita	glutinata	III	Microperforates_Globigerinita_glutinata_III
ISU36	2	4	Yes	R-649_2_4_2	0	0	0	0	0	2	0	0	0	0	0	0	0	0	0	0	0	0	0	2	0	0	0	0	0	0	0	0	0	0	0	2	Microperforates_Globigerinita_glutinata_III_NA_NA	Microperforates	Globigerinita	glutinata	III	NAFJ643277_Microperforates_Globigerinita_glutinata_III_NA_NA;	Microperforates	Globigerinita	uvula	I	Microperforates_Globigerinita_uvula_I
ISU360	3	15	Yes	R-377_3_15_1	0	0	0	0	0	0	0	0	0	2	11	0	0	0	0	0	0	0	0	0	0	0	0	0	0	2	0	0	0	0	0	1	Non-Spinose_Neogloboquadrina_pachyderma_I_NA_NA	Non-Spinose	Neogloboquadrina	pachyderma	I	NAAY305329_Non-Spinose_Neogloboquadrina_pachyderma_I_NA_NA;	Non-Spinose	Neogloboquadrina	pachyderma	I	Non-Spinose_Neogloboquadrina_pachyderma_I
ISU361	5	28	Yes	R-270_5_28_1	17	2	0	0	0	0	0	0	0	0	0	0	2	3	0	0	0	0	0	0	0	0	0	0	0	0	0	0	0	0	4	1	Microperforates_Globigerinita_uvula	Microperforates	Globigerinita	uvula	-	KM193181_Microperforates_Globigerinita_uvula_NA_NA_NA;KM193691_Microperforates_Globigerinita_uvula_NA_NA_NA;KM193364_Microperforates_Globigerinita_uvula_NA_NA_NA;AF387173_Microperforates_Globigerinita_uvula_II_NA_NA;KM194324_Microperforates_Globigerinita_uvula_NA_NA_NA;	Microperforates	Globigerinita	uvula	II	Microperforates_Globigerinita_uvula_II
ISU362	5	189	Yes	R-81_5_189_1	0	0	0	0	11	50	0	0	0	0	0	0	0	0	0	0	0	0	32	43	0	53	0	0	0	0	0	0	0	0	0	1	Microperforates_Globigerinita_glutinata_III_NA_NA	Microperforates	Globigerinita	glutinata	III	NAFJ643283_Microperforates_Globigerinita_glutinata_III_NA_NA;	Microperforates	Globigerinita	glutinata	III	Microperforates_Globigerinita_glutinata_III
ISU363	1	3	NO	-	0	0	0	0	3	0	0	0	0	0	0	0	0	0	0	0	0	0	0	0	0	0	0	0	0	0	0	0	0	0	0	7	Microperforates_Globigerinita_uvula	Microperforates	Globigerinita	uvula	-	FJ643298_Microperforates_Globigerinita_uvula_I_NA_NA;KM193160_Microperforates_Globigerinita_uvula_NA_NA_NA;KM193079_Microperforates_Globigerinita_uvula_NA_NA_NA;KM193075_Microperforates_Globigerinita_uvula_NA_NA_NA;KM193070_Microperforates_Globigerinita_uvula_NA_NA_NA;	-	-	-	-	-
ISU364	3	7	Yes	R-541_3_7_1	0	0	0	0	0	0	0	0	0	0	0	0	0	0	0	0	0	0	2	3	0	2	0	0	0	0	0	0	0	0	0	1	Microperforates_Globigerinita_glutinata	Microperforates	Globigerinita	glutinata	-	JQ799900_Microperforates_Globigerinita_glutinata_IV_NA_NA;FJ643296_Microperforates_Globigerinita_glutinata_III_NA_NA;FJ643277_Microperforates_Globigerinita_glutinata_III_NA_NA;KM193199_Microperforates_Globigerinita_glutinata_NA_NA_NA;AY453136_Microperforates_Globigerinita_glutinata_III_NA_NA;	Microperforates	Globigerinita	glutinata	III	Microperforates_Globigerinita_glutinata_III
ISU365	1	3	NO	-	0	0	0	0	0	0	0	0	0	0	0	0	0	3	0	0	0	0	0	0	0	0	0	0	0	0	0	0	0	0	0	6	Spinose_Globigerina_bulloides_II	Spinose	Globigerina	bulloides	II	KM193333_Spinose_Globigerina_bulloides_II_a_NA;AF250106_Spinose_Globigerina_bulloides_II_d_NA;KM193474_Spinose_Globigerina_bulloides_II_b_NA;GQ293069_Spinose_Globigerina_bulloides_II_f_NA;KM193709_Spinose_Globigerina_bulloides_II_c_NA;KM193700_Spinose_Globigerina_bulloides_II_a_NA;AF250111_Spinose_Globigerina_bulloides_II_c_NA;KM193605_Spinose_Globigerina_bulloides_II_a_NA	-	-	-	-	-
ISU366	1	3	NO	-	0	0	0	0	0	0	0	0	0	0	0	0	0	0	0	0	0	0	0	0	0	0	0	0	0	0	0	0	3	0	0	1	Non-Spinose_Neogloboquadrina_pachyderma_IV_NA_NA	Non-Spinose	Neogloboquadrina	pachyderma	IV	NAKM193550_Non-Spinose_Neogloboquadrina_pachyderma_IV_NA_NA;KM193530_Non-Spinose_Neogloboquadrina_pachyderma_IV_NA_NA;KM193284_Non-Spinose_Neogloboquadrina_pachyderma_IV_NA_NA;KM193861_Non-Spinose_Neogloboquadrina_pachyderma_IV_NA_NA;KM193614_Non-Spinose_Neogloboquadrina_pachyderma_IV_NA_NA;KM193889_Non-Spinose_Neogloboquadrina_pachyderma_IV_NA_NA;KM193556_Non-Spinose_Neogloboquadrina_pachyderma_…	-	-	-	-	-
ISU367	1	76	Yes	R-143_1_76_0	0	0	0	0	76	0	0	0	0	0	0	0	0	0	0	0	0	0	0	0	0	0	0	0	0	0	0	0	0	0	0	0	Spinose_Orbulina_universa	Spinose	Orbulina	universa	-	Z69601_Spinose_Orbulina_universa_I_NA_NA;KM194160_Spinose_Orbulina_universa_NA_NA_NA	Spinose	Orbulina	universa	I	Spinose_Orbulina_universa_I
ISU368	1	3	NO	-	0	0	0	0	0	3	0	0	0	0	0	0	0	0	0	0	0	0	0	0	0	0	0	0	0	0	0	0	0	0	0	7	Microperforates_Globigerinita_uvula	Microperforates	Globigerinita	uvula	-	FJ643298_Microperforates_Globigerinita_uvula_I_NA_NA;KM193079_Microperforates_Globigerinita_uvula_NA_NA_NA;KM193070_Microperforates_Globigerinita_uvula_NA_NA_NA;	-	-	-	-	-
ISU369	1	2	NO	-	0	0	0	0	0	0	0	0	0	0	0	0	0	0	0	0	0	0	0	2	0	0	0	0	0	0	0	0	0	0	0	2	Microperforates_Globigerinita_glutinata	Microperforates	Globigerinita	glutinata	-	JQ799900_Microperforates_Globigerinita_glutinata_IV_NA_NA;FJ643296_Microperforates_Globigerinita_glutinata_III_NA_NA;KM193199_Microperforates_Globigerinita_glutinata_NA_NA_NA;AY453136_Microperforates_Globigerinita_glutinata_III_NA_NA	-	-	-	-	-
ISU37	1	5	NO	-	0	0	0	0	5	0	0	0	0	0	0	0	0	0	0	0	0	0	0	0	0	0	0	0	0	0	0	0	0	0	0	6	Microperforates_Globigerinita_glutinata	Microperforates	Globigerinita	glutinata	-	KM193497_Microperforates_Globigerinita_glutinata_NA_NA_NA;FJ643294_Microperforates_Globigerinita_glutinata_I_NA_NA;FJ643286_Microperforates_Globigerinita_glutinata_I_NA_NA;FJ643283_Microperforates_Globigerinita_glutinata_III_NA_NA;KM193484_Microperforates_Globigerinita_glutinata_NA_NA_NA;KM193151_Microperforates_Globigerinita_glutinata_NA_NA_NA	-	-	-	-	-
ISU370	1	2	NO	-	0	0	0	0	0	0	0	0	0	0	0	0	0	0	0	0	0	0	0	2	0	0	0	0	0	0	0	0	0	0	0	2	Microperforates_Globigerinita_glutinata_III_NA_NA	Microperforates	Globigerinita	glutinata	III	NAFJ643283_Microperforates_Globigerinita_glutinata_III_NA_NA;	-	-	-	-	-
ISU371	4	71	Yes	R-149_4_71_1	0	0	0	0	0	6	0	0	0	0	0	0	0	0	0	0	0	0	15	26	0	24	0	0	0	0	0	0	0	0	0	1	Microperforates_Globigerinita_glutinata	Microperforates	Globigerinita	glutinata	-	JQ799900_Microperforates_Globigerinita_glutinata_IV_NA_NA;FJ643296_Microperforates_Globigerinita_glutinata_III_NA_NA;KM193199_Microperforates_Globigerinita_glutinata_NA_NA_NA;AY453136_Microperforates_Globigerinita_glutinata_III_NA_NA	Microperforates	Globigerinita	glutinata	III	Microperforates_Globigerinita_glutinata_III
ISU372	2	4	Yes	R-665_2_4_1	0	0	0	0	0	2	0	0	0	0	0	0	0	0	0	0	0	0	0	0	0	2	0	0	0	0	0	0	0	0	0	1	Microperforates_Globigerinita_uvula	Microperforates	Globigerinita	uvula	-	FJ643298_Microperforates_Globigerinita_uvula_I_NA_NA;KM193070_Microperforates_Globigerinita_uvula_NA_NA_NA;KM193079_Microperforates_Globigerinita_uvula_NA_NA_NA;	Microperforates	Globigerinita	uvula	I	Microperforates_Globigerinita_uvula_I
ISU373	1	3	NO	-	0	0	0	0	0	0	0	0	0	0	0	0	0	0	0	0	0	0	0	3	0	0	0	0	0	0	0	0	0	0	0	4	Microperforates_Globigerinita_glutinata	Microperforates	Globigerinita	glutinata	-	JQ799900_Microperforates_Globigerinita_glutinata_IV_NA_NA;FJ643288_Microperforates_Globigerinita_glutinata_I_NA_NA;KM193539_Microperforates_Globigerinita_glutinata_NA_NA_NA;FJ643296_Microperforates_Globigerinita_glutinata_III_NA_NA;FJ643277_Microperforates_Globigerinita_glutinata_III_NA_NA;KM193303_Microperforates_Globigerinita_glutinata_NA_NA_NA;KM193199_Microperforates_Globigerinita_glutinata_N…	-	-	-	-	-
ISU374	1	2	NO	-	0	0	0	0	0	0	0	0	0	0	0	0	0	0	0	0	0	0	0	2	0	0	0	0	0	0	0	0	0	0	0	3	Microperforates_Globigerinita_glutinata	Microperforates	Globigerinita	glutinata	-	KM193151_Microperforates_Globigerinita_glutinata_NA_NA_NA;KM193497_Microperforates_Globigerinita_glutinata_NA_NA_NA;FJ643294_Microperforates_Globigerinita_glutinata_I_NA_NA;	-	-	-	-	-
ISU375	1	2	NO	-	0	0	0	0	0	0	0	0	0	0	0	0	0	0	0	0	0	0	0	0	0	0	0	0	0	0	0	0	2	0	0	1	Non-Spinose_Neogloboquadrina_pachyderma_IV_NA_NA	Non-Spinose	Neogloboquadrina	pachyderma	IV	NAKM193550_Non-Spinose_Neogloboquadrina_pachyderma_IV_NA_NA;KM193530_Non-Spinose_Neogloboquadrina_pachyderma_IV_NA_NA;KM193284_Non-Spinose_Neogloboquadrina_pachyderma_IV_NA_NA;KM193861_Non-Spinose_Neogloboquadrina_pachyderma_IV_NA_NA;KM193614_Non-Spinose_Neogloboquadrina_pachyderma_IV_NA_NA;KM193889_Non-Spinose_Neogloboquadrina_pachyderma_IV_NA_NA;KM193556_Non-Spinose_Neogloboquadrina_pachyderma_…	-	-	-	-	-
ISU376	1	3	NO	-	3	0	0	0	0	0	0	0	0	0	0	0	0	0	0	0	0	0	0	0	0	0	0	0	0	0	0	0	0	0	0	1	Microperforates_Globigerinita_uvula	Microperforates	Globigerinita	uvula	-	KM193181_Microperforates_Globigerinita_uvula_NA_NA_NA;KM193691_Microperforates_Globigerinita_uvula_NA_NA_NA;KM193364_Microperforates_Globigerinita_uvula_NA_NA_NA;AF387173_Microperforates_Globigerinita_uvula_II_NA_NA;KM194324_Microperforates_Globigerinita_uvula_NA_NA_NA;	-	-	-	-	-
ISU377	1	2	NO	-	0	0	0	0	2	0	0	0	0	0	0	0	0	0	0	0	0	0	0	0	0	0	0	0	0	0	0	0	0	0	0	3	Microperforates_Globigerinita_glutinata	Microperforates	Globigerinita	glutinata	-	KM193497_Microperforates_Globigerinita_glutinata_NA_NA_NA;KM193151_Microperforates_Globigerinita_glutinata_NA_NA_NA;FJ643283_Microperforates_Globigerinita_glutinata_III_NA_NA;FJ643294_Microperforates_Globigerinita_glutinata_I_NA_NA	-	-	-	-	-
ISU378	1	2	NO	-	0	0	0	0	0	2	0	0	0	0	0	0	0	0	0	0	0	0	0	0	0	0	0	0	0	0	0	0	0	0	0	3	Microperforates_Globigerinita_glutinata	Microperforates	Globigerinita	glutinata	-	FJ643294_Microperforates_Globigerinita_glutinata_I_NA_NA;KM193497_Microperforates_Globigerinita_glutinata_NA_NA_NA;FJ643283_Microperforates_Globigerinita_glutinata_III_NA_NA;KM193151_Microperforates_Globigerinita_glutinata_NA_NA_NA	-	-	-	-	-
ISU379	4	18	Yes	R-349_4_18_1	0	0	0	0	0	4	0	0	0	0	0	0	0	0	0	0	0	0	4	4	0	6	0	0	0	0	0	0	0	0	0	1	Microperforates_Globigerinita_glutinata	Microperforates	Globigerinita	glutinata	-	JQ799900_Microperforates_Globigerinita_glutinata_IV_NA_NA;FJ643296_Microperforates_Globigerinita_glutinata_III_NA_NA;KM193199_Microperforates_Globigerinita_glutinata_NA_NA_NA;AY453136_Microperforates_Globigerinita_glutinata_III_NA_NA	Microperforates	Globigerinita	glutinata	III	Microperforates_Globigerinita_glutinata_III
ISU38	1	40	Yes	R-223_1_40_2	0	0	0	0	40	0	0	0	0	0	0	0	0	0	0	0	0	0	0	0	0	0	0	0	0	0	0	0	0	0	0	2	Microperforates_Globigerinita_uvula	Microperforates	Globigerinita	uvula	-	FJ643298_Microperforates_Globigerinita_uvula_I_NA_NA;KM193070_Microperforates_Globigerinita_uvula_NA_NA_NA;KM193079_Microperforates_Globigerinita_uvula_NA_NA_NA;	Microperforates	Globigerinita	uvula	I	Microperforates_Globigerinita_uvula_I
ISU380	5	102	Yes	R-121_5_102_1	0	0	0	0	4	37	0	0	0	0	0	0	0	0	0	0	0	0	21	23	0	17	0	0	0	0	0	0	0	0	0	1	Microperforates_Globigerinita_glutinata_III_NA_NA	Microperforates	Globigerinita	glutinata	III	NAFJ643283_Microperforates_Globigerinita_glutinata_III_NA_NA;	Microperforates	Globigerinita	glutinata	III	Microperforates_Globigerinita_glutinata_III
ISU381	2	4	Yes	R-668_2_4_6	0	0	0	0	2	2	0	0	0	0	0	0	0	0	0	0	0	0	0	0	0	0	0	0	0	0	0	0	0	0	0	6	Microperforates_Globigerinita_uvula	Microperforates	Globigerinita	uvula	-	FJ643298_Microperforates_Globigerinita_uvula_I_NA_NA;KM193160_Microperforates_Globigerinita_uvula_NA_NA_NA;KM193079_Microperforates_Globigerinita_uvula_NA_NA_NA;KM193075_Microperforates_Globigerinita_uvula_NA_NA_NA;KM193070_Microperforates_Globigerinita_uvula_NA_NA_NA;	Microperforates	Globigerinita	uvula	I	Microperforates_Globigerinita_uvula_I
ISU382	1	2	NO	-	0	0	0	0	0	0	0	0	0	0	0	0	0	0	0	0	0	0	0	2	0	0	0	0	0	0	0	0	0	0	0	4	Microperforates_Globigerinita_glutinata	Microperforates	Globigerinita	glutinata	-	JQ799900_Microperforates_Globigerinita_glutinata_IV_NA_NA;FJ643288_Microperforates_Globigerinita_glutinata_I_NA_NA;KM193539_Microperforates_Globigerinita_glutinata_NA_NA_NA;FJ643296_Microperforates_Globigerinita_glutinata_III_NA_NA;FJ643277_Microperforates_Globigerinita_glutinata_III_NA_NA;KM193303_Microperforates_Globigerinita_glutinata_NA_NA_NA;KM193199_Microperforates_Globigerinita_glutinata_N…	-	-	-	-	-
ISU383	1	2	NO	-	0	0	0	0	0	0	0	0	0	0	0	0	0	0	0	0	0	0	0	0	0	2	0	0	0	0	0	0	0	0	0	2	Microperforates_Globigerinita_glutinata	Microperforates	Globigerinita	glutinata	-	KM193199_Microperforates_Globigerinita_glutinata_NA_NA_NA;AY453136_Microperforates_Globigerinita_glutinata_III_NA_NA;JQ799900_Microperforates_Globigerinita_glutinata_IV_NA_NA;	-	-	-	-	-
ISU384	1	2	NO	-	0	0	0	0	0	0	0	0	0	0	0	0	0	0	0	0	0	0	0	2	0	0	0	0	0	0	0	0	0	0	0	1	Microperforates_Globigerinita_glutinata_II_NA_NA	Microperforates	Globigerinita	glutinata	II	NAAB468826_Microperforates_Globigerinita_glutinata_II_NA_NA;	-	-	-	-	-
ISU385	4	20	Yes	R-331_4_20_1	0	0	0	0	0	6	0	0	0	0	0	0	0	0	0	0	0	0	6	3	0	5	0	0	0	0	0	0	0	0	0	1	Microperforates_Globigerinita_glutinata_III_NA_NA	Microperforates	Globigerinita	glutinata	III	NAFJ643283_Microperforates_Globigerinita_glutinata_III_NA_NA;	Microperforates	Globigerinita	glutinata	III	Microperforates_Globigerinita_glutinata_III
ISU386	1	4	NO	-	0	0	0	0	0	0	0	0	0	0	0	0	0	0	0	0	0	0	0	0	0	0	0	0	0	0	0	0	4	0	0	1	Non-Spinose_Neogloboquadrina_pachyderma_IV_NA_NA	Non-Spinose	Neogloboquadrina	pachyderma	IV	NAKM193680_Non-Spinose_Neogloboquadrina_pachyderma_IV_NA_NA;	-	-	-	-	-
ISU387	2	5	Yes	R-607_2_5_1	0	0	0	0	0	3	0	0	0	0	0	0	0	0	0	0	0	0	0	2	0	0	0	0	0	0	0	0	0	0	0	1	Microperforates_Globigerinita_glutinata_III_NA_NA	Microperforates	Globigerinita	glutinata	III	NAFJ643283_Microperforates_Globigerinita_glutinata_III_NA_NA;	Microperforates	Candeina	nitida	I	Microperforates_Candeina_nitida_I
ISU388	5	36	Yes	R-239_5_36_3	0	0	0	2	0	11	0	0	0	0	0	0	0	0	0	0	0	0	11	4	0	8	0	0	0	0	0	0	0	0	0	3	Microperforates_Globigerinita_glutinata	Microperforates	Globigerinita	glutinata	-	FJ643286_Microperforates_Globigerinita_glutinata_I_NA_NA;KM193484_Microperforates_Globigerinita_glutinata_NA_NA_NA	Microperforates	Globigerinita	glutinata	I	Microperforates_Globigerinita_glutinata_I
ISU389	1	2	NO	-	0	0	0	0	0	0	0	0	0	0	2	0	0	0	0	0	0	0	0	0	0	0	0	0	0	0	0	0	0	0	0	1	Non-Spinose_Neogloboquadrina_pachyderma_I_NA_NA	Non-Spinose	Neogloboquadrina	pachyderma	I	NAAY305329_Non-Spinose_Neogloboquadrina_pachyderma_I_NA_NA;	-	-	-	-	-
ISU39	1	46	Yes	R-200_1_46_2	0	0	0	0	0	46	0	0	0	0	0	0	0	0	0	0	0	0	0	0	0	0	0	0	0	0	0	0	0	0	0	2	Microperforates_Globigerinita_glutinata_III_NA_NA	Microperforates	Globigerinita	glutinata	III	NAFJ643283_Microperforates_Globigerinita_glutinata_III_NA_NA;	Microperforates	Globigerinita	glutinata	III	Microperforates_Globigerinita_glutinata_III
ISU390	6	235	Yes	R-64_6_235_1	0	0	0	2	4	171	0	0	0	0	0	0	0	0	0	0	0	0	13	20	0	25	0	0	0	0	0	0	0	0	0	1	Microperforates_Globigerinita_glutinata_III_NA_NA	Microperforates	Globigerinita	glutinata	III	NAFJ643283_Microperforates_Globigerinita_glutinata_III_NA_NA;	Microperforates	Globigerinita	glutinata	III	Microperforates_Globigerinita_glutinata_III
ISU391	3	7	Yes	R-535_3_7_1	0	0	0	0	0	3	0	0	0	0	0	0	0	0	0	0	0	0	2	2	0	0	0	0	0	0	0	0	0	0	0	1	Microperforates_Globigerinita_glutinata	Microperforates	Globigerinita	glutinata	-	JQ799900_Microperforates_Globigerinita_glutinata_IV_NA_NA;FJ643296_Microperforates_Globigerinita_glutinata_III_NA_NA;KM193199_Microperforates_Globigerinita_glutinata_NA_NA_NA;AY453136_Microperforates_Globigerinita_glutinata_III_NA_NA	Microperforates	Globigerinita	glutinata	III	Microperforates_Globigerinita_glutinata_III
ISU392	5	102	Yes	R-120_5_102_1	0	0	0	0	2	13	0	0	0	0	0	0	0	0	0	0	0	0	11	35	0	41	0	0	0	0	0	0	0	0	0	1	Microperforates_Globigerinita_glutinata	Microperforates	Globigerinita	glutinata	-	FJ643296_Microperforates_Globigerinita_glutinata_III_NA_NA;KM193199_Microperforates_Globigerinita_glutinata_NA_NA_NA;FJ643277_Microperforates_Globigerinita_glutinata_III_NA_NA;AY453136_Microperforates_Globigerinita_glutinata_III_NA_NA;JQ799900_Microperforates_Globigerinita_glutinata_IV_NA_NA;	Microperforates	Globigerinita	glutinata	III	Microperforates_Globigerinita_glutinata_III
ISU393	5	21	Yes	R-325_5_21_1	0	0	0	0	3	7	0	0	0	0	0	0	0	0	0	0	0	0	4	3	0	4	0	0	0	0	0	0	0	0	0	1	Microperforates_Globigerinita_glutinata_III_NA_NA	Microperforates	Globigerinita	glutinata	III	NAFJ643283_Microperforates_Globigerinita_glutinata_III_NA_NA;	Microperforates	Globigerinita	glutinata	III	Microperforates_Globigerinita_glutinata_III
ISU394	3	8	Yes	R-512_3_8_1	0	0	0	0	0	3	0	0	0	0	0	0	0	0	0	0	0	0	3	0	0	2	0	0	0	0	0	0	0	0	0	1	Microperforates_Globigerinita_glutinata_III_NA_NA	Microperforates	Globigerinita	glutinata	III	NAFJ643296_Microperforates_Globigerinita_glutinata_III_NA_NA;	Microperforates	Globigerinita	glutinata	III	Microperforates_Globigerinita_glutinata_III
ISU395	2	9	Yes	R-475_2_9_5	0	0	0	0	0	5	0	0	0	0	0	0	0	0	0	0	0	0	4	0	0	0	0	0	0	0	0	0	0	0	0	5	Microperforates_Globigerinita_uvula	Microperforates	Globigerinita	uvula	-	FJ643298_Microperforates_Globigerinita_uvula_I_NA_NA;KM193079_Microperforates_Globigerinita_uvula_NA_NA_NA;KM193070_Microperforates_Globigerinita_uvula_NA_NA_NA;	Microperforates	Globigerinita	uvula	I	Microperforates_Globigerinita_uvula_I
ISU396	1	2	NO	-	0	0	0	0	0	2	0	0	0	0	0	0	0	0	0	0	0	0	0	0	0	0	0	0	0	0	0	0	0	0	0	1	Microperforates_Globigerinita_glutinata_NA_NA_NA	Microperforates	Globigerinita	glutinata	NA	NAKM193539_Microperforates_Globigerinita_glutinata_NA_NA_NA;	-	-	-	-	-
ISU397	1	2	NO	-	2	0	0	0	0	0	0	0	0	0	0	0	0	0	0	0	0	0	0	0	0	0	0	0	0	0	0	0	0	0	0	1	Microperforates_Globigerinita_uvula	Microperforates	Globigerinita	uvula	-	KM193181_Microperforates_Globigerinita_uvula_NA_NA_NA;KM193691_Microperforates_Globigerinita_uvula_NA_NA_NA;KM193364_Microperforates_Globigerinita_uvula_NA_NA_NA;AF387173_Microperforates_Globigerinita_uvula_II_NA_NA;KM194324_Microperforates_Globigerinita_uvula_NA_NA_NA;	-	-	-	-	-
ISU398	1	2	NO	-	0	0	0	0	0	0	0	0	0	0	0	2	0	0	0	0	0	0	0	0	0	0	0	0	0	0	0	0	0	0	0	2	Non-Spinose_Neogloboquadrina_pachyderma_I_NA_NA	Non-Spinose	Neogloboquadrina	pachyderma	I	NAAY305329_Non-Spinose_Neogloboquadrina_pachyderma_I_NA_NA;	-	-	-	-	-
ISU399	2	6	Yes	R-603_2_6_4	0	0	0	0	0	0	0	0	0	0	0	0	0	0	0	0	0	0	4	0	0	2	0	0	0	0	0	0	0	0	0	4	Microperforates_Globigerinita_glutinata	Microperforates	Globigerinita	glutinata	-	KM193484_Microperforates_Globigerinita_glutinata_NA_NA_NA;FJ643286_Microperforates_Globigerinita_glutinata_I_NA_NA	Microperforates	Globigerinita	glutinata	I	Microperforates_Globigerinita_glutinata_I
ISU4	2	5	Yes	R-622_2_5_1	0	0	0	0	0	0	0	0	0	0	3	0	0	0	0	0	0	0	0	0	0	0	0	0	0	2	0	0	0	0	0	1	Non-Spinose_Neogloboquadrina_pachyderma_I_NA_NA	Non-Spinose	Neogloboquadrina	pachyderma	I	NAAY305329_Non-Spinose_Neogloboquadrina_pachyderma_I_NA_NA;	Non-Spinose	Neogloboquadrina	pachyderma	I	Non-Spinose_Neogloboquadrina_pachyderma_I
ISU40	5	223	Yes	R-68_5_223_1	0	0	0	0	5	119	0	0	0	0	0	0	0	0	0	0	0	0	27	30	0	42	0	0	0	0	0	0	0	0	0	1	Microperforates_Globigerinita_glutinata_III_NA_NA	Microperforates	Globigerinita	glutinata	III	NAFJ643283_Microperforates_Globigerinita_glutinata_III_NA_NA;	Microperforates	Globigerinita	glutinata	III	Microperforates_Globigerinita_glutinata_III
ISU400	4	33	Yes	R-250_4_33_1	0	0	0	0	0	9	0	0	0	0	0	0	0	0	0	0	0	0	6	9	0	9	0	0	0	0	0	0	0	0	0	1	Microperforates_Globigerinita_glutinata	Microperforates	Globigerinita	glutinata	-	JQ799900_Microperforates_Globigerinita_glutinata_IV_NA_NA;FJ643296_Microperforates_Globigerinita_glutinata_III_NA_NA;KM193199_Microperforates_Globigerinita_glutinata_NA_NA_NA;AY453136_Microperforates_Globigerinita_glutinata_III_NA_NA	Microperforates	Globigerinita	glutinata	III	Microperforates_Globigerinita_glutinata_III
ISU401	1	2	NO	-	0	0	0	0	0	0	0	0	0	0	0	0	0	0	0	0	0	0	0	0	0	0	0	0	0	0	0	0	0	0	2	5	Microperforates_Globigerinita_uvula	Microperforates	Globigerinita	uvula	-	KM193691_Microperforates_Globigerinita_uvula_NA_NA_NA;KM193181_Microperforates_Globigerinita_uvula_NA_NA_NA;KM193324_Microperforates_Globigerinita_uvula_NA_NA_NA;KM193357_Microperforates_Globigerinita_uvula_NA_NA_NA;KM193364_Microperforates_Globigerinita_uvula_NA_NA_NA;AF387173_Microperforates_Globigerinita_uvula_II_NA_NA;KM194324_Microperforates_Globigerinita_uvula_NA_NA_NA;	-	-	-	-	-
ISU402	1	2	NO	-	0	0	0	0	0	0	0	0	0	0	0	0	0	0	0	0	0	0	0	2	0	0	0	0	0	0	0	0	0	0	0	6	Microperforates_Globigerinita_glutinata	Microperforates	Globigerinita	glutinata	-	FJ643286_Microperforates_Globigerinita_glutinata_I_NA_NA;KM193484_Microperforates_Globigerinita_glutinata_NA_NA_NA	-	-	-	-	-
ISU403	1	6	NO	-	0	0	0	0	0	0	0	0	0	0	0	0	0	0	0	0	0	0	0	0	0	0	0	0	0	0	0	0	6	0	0	2	Non-Spinose_Neogloboquadrina_pachyderma	Non-Spinose	Neogloboquadrina	pachyderma	-	KM193550_Non-Spinose_Neogloboquadrina_pachyderma_IV_NA_NA;KM193530_Non-Spinose_Neogloboquadrina_pachyderma_IV_NA_NA;KM193284_Non-Spinose_Neogloboquadrina_pachyderma_IV_NA_NA;KM193490_Non-Spinose_Neogloboquadrina_pachyderma_IV_NA_NA;KM193584_Non-Spinose_Neogloboquadrina_pachyderma_IV_NA_NA;KM193614_Non-Spinose_Neogloboquadrina_pachyderma_IV_NA_NA;KM193889_Non-Spinose_Neogloboquadrina_pachyderma_IV…	-	-	-	-	-
ISU404	5	43	Yes	R-214_5_43_1	0	0	0	0	5	16	0	0	0	0	0	0	0	0	0	0	0	0	5	7	0	10	0	0	0	0	0	0	0	0	0	1	Microperforates_Globigerinita_glutinata_III_NA_NA	Microperforates	Globigerinita	glutinata	III	NAFJ643283_Microperforates_Globigerinita_glutinata_III_NA_NA;	Microperforates	Globigerinita	glutinata	III	Microperforates_Globigerinita_glutinata_III
ISU405	1	2	NO	-	0	0	0	0	0	0	0	0	0	0	0	0	0	0	0	0	0	0	0	2	0	0	0	0	0	0	0	0	0	0	0	6	Microperforates_Globigerinita_uvula	Microperforates	Globigerinita	uvula	-	FJ643298_Microperforates_Globigerinita_uvula_I_NA_NA;KM193160_Microperforates_Globigerinita_uvula_NA_NA_NA;KM193075_Microperforates_Globigerinita_uvula_NA_NA_NA;KM193070_Microperforates_Globigerinita_uvula_NA_NA_NA;KM193079_Microperforates_Globigerinita_uvula_NA_NA_NA;	-	-	-	-	-
ISU406	2	5	Yes	R-608_2_5_1	0	0	0	0	0	2	0	0	0	0	0	0	0	0	0	0	0	0	0	3	0	0	0	0	0	0	0	0	0	0	0	1	Microperforates_Globigerinita_glutinata	Microperforates	Globigerinita	glutinata	-	JQ799900_Microperforates_Globigerinita_glutinata_IV_NA_NA;FJ643296_Microperforates_Globigerinita_glutinata_III_NA_NA;KM193199_Microperforates_Globigerinita_glutinata_NA_NA_NA;AY453136_Microperforates_Globigerinita_glutinata_III_NA_NA	Microperforates	Candeina	nitida	I	Microperforates_Candeina_nitida_I
ISU407	1	2	NO	-	2	0	0	0	0	0	0	0	0	0	0	0	0	0	0	0	0	0	0	0	0	0	0	0	0	0	0	0	0	0	0	1	Microperforates_Globigerinita_uvula	Microperforates	Globigerinita	uvula	-	KM193181_Microperforates_Globigerinita_uvula_NA_NA_NA;KM193691_Microperforates_Globigerinita_uvula_NA_NA_NA;KM193364_Microperforates_Globigerinita_uvula_NA_NA_NA;AF387173_Microperforates_Globigerinita_uvula_II_NA_NA;KM194324_Microperforates_Globigerinita_uvula_NA_NA_NA;	-	-	-	-	-
ISU408	1	3	NO	-	0	0	0	0	3	0	0	0	0	0	0	0	0	0	0	0	0	0	0	0	0	0	0	0	0	0	0	0	0	0	0	7	Microperforates_Globigerinita_uvula	Microperforates	Globigerinita	uvula	-	FJ643298_Microperforates_Globigerinita_uvula_I_NA_NA;KM193160_Microperforates_Globigerinita_uvula_NA_NA_NA;KM193079_Microperforates_Globigerinita_uvula_NA_NA_NA;KM193075_Microperforates_Globigerinita_uvula_NA_NA_NA;KM193070_Microperforates_Globigerinita_uvula_NA_NA_NA;	-	-	-	-	-
ISU409	1	2	NO	-	0	0	0	0	0	0	0	0	0	0	0	0	0	0	0	0	0	0	0	2	0	0	0	0	0	0	0	0	0	0	0	6	Microperforates_Globigerinita_glutinata	Microperforates	Globigerinita	glutinata	-	FJ643286_Microperforates_Globigerinita_glutinata_I_NA_NA;KM193484_Microperforates_Globigerinita_glutinata_NA_NA_NA	-	-	-	-	-
ISU41	1	2	NO	-	0	0	0	0	0	0	0	0	0	0	0	0	0	0	0	0	0	0	0	0	0	2	0	0	0	0	0	0	0	0	0	2	Microperforates_Globigerinita_glutinata	Microperforates	Globigerinita	glutinata	-	FJ643277_Microperforates_Globigerinita_glutinata_III_NA_NA;FJ643296_Microperforates_Globigerinita_glutinata_III_NA_NA;JQ799900_Microperforates_Globigerinita_glutinata_IV_NA_NA;KM193199_Microperforates_Globigerinita_glutinata_NA_NA_NA;AY453136_Microperforates_Globigerinita_glutinata_III_NA_NA;	-	-	-	-	-
ISU410	1	2	NO	-	0	0	0	0	0	0	0	0	0	0	0	0	0	0	0	0	0	0	0	0	0	0	0	0	0	2	0	0	0	0	0	2	Non-Spinose_Neogloboquadrina_pachyderma_I_NA_NA	Non-Spinose	Neogloboquadrina	pachyderma	I	NAAY305329_Non-Spinose_Neogloboquadrina_pachyderma_I_NA_NA;	-	-	-	-	-
ISU411	2	6	Yes	R-564_2_6_2	0	0	0	0	0	2	0	0	0	0	0	0	0	0	0	0	0	0	0	0	0	4	0	0	0	0	0	0	0	0	0	2	Spinose_Globigerina_bulloides	Spinose	Globigerina	bulloides	-	Z83957_Spinose_Globigerina_bulloides_NA_NA_NA;GQ293072_Spinose_Globigerina_bulloides_I_c_NA;GQ293070_Spinose_Globigerina_bulloides_I_d_NA;GU060421_Spinose_Globigerina_bulloides_I_e_NA	Spinose	Globigerina	bulloides	I	Spinose_Globigerina_bulloides_I
ISU412	1	200	Yes	R-77_1_200_0	0	0	0	0	0	200	0	0	0	0	0	0	0	0	0	0	0	0	0	0	0	0	0	0	0	0	0	0	0	0	0	0	Spinose_Globigerinella	Spinose	Globigerinella	siphonifera	-	AF102228_Spinose_Globigerinella_siphonifera_II_b_NA;KF769827_Spinose_Globigerinella_calida_II_b_NA;FJ643376_Spinose_Globigerinella_siphonifera_NA_NA_NA;	Spinose	Globigerinella	siphonifera	IIa	Spinose_Globigerinella_siphonifera_IIa
ISU413	4	9	Yes	R-482_4_9_4	0	0	0	0	0	2	0	0	0	0	0	0	0	0	0	0	0	0	2	2	0	3	0	0	0	0	0	0	0	0	0	4	Microperforates_Globigerinita_glutinata	Microperforates	Globigerinita	glutinata	-	FJ643286_Microperforates_Globigerinita_glutinata_I_NA_NA;KM193484_Microperforates_Globigerinita_glutinata_NA_NA_NA	Microperforates	Globigerinita	glutinata	I	Microperforates_Globigerinita_glutinata_I
ISU414	1	2	NO	-	0	0	0	0	2	0	0	0	0	0	0	0	0	0	0	0	0	0	0	0	0	0	0	0	0	0	0	0	0	0	0	4	Microperforates_Globigerinita_glutinata	Microperforates	Globigerinita	glutinata	-	KM193497_Microperforates_Globigerinita_glutinata_NA_NA_NA;KM193151_Microperforates_Globigerinita_glutinata_NA_NA_NA;FJ643283_Microperforates_Globigerinita_glutinata_III_NA_NA;FJ643294_Microperforates_Globigerinita_glutinata_I_NA_NA	-	-	-	-	-
ISU415	1	2	NO	-	0	0	0	0	0	2	0	0	0	0	0	0	0	0	0	0	0	0	0	0	0	0	0	0	0	0	0	0	0	0	0	2	Microperforates_Globigerinita_glutinata	Microperforates	Globigerinita	glutinata	-	JQ799900_Microperforates_Globigerinita_glutinata_IV_NA_NA;FJ643296_Microperforates_Globigerinita_glutinata_III_NA_NA;KM193199_Microperforates_Globigerinita_glutinata_NA_NA_NA;AY453136_Microperforates_Globigerinita_glutinata_III_NA_NA	-	-	-	-	-
ISU416	2	45	Yes	R-204_2_45_0	0	0	0	8	0	37	0	0	0	0	0	0	0	0	0	0	0	0	0	0	0	0	0	0	0	0	0	0	0	0	0	0	Non-Spinose_Neogloboquadrina_dutertrei	Non-Spinose	Neogloboquadrina	dutertrei	-	KM193735_Non-Spinose_Neogloboquadrina_dutertrei_I_a_NA;KM193746_Non-Spinose_Neogloboquadrina_dutertrei_NA_NA_NA;EU199449_Non-Spinose_Neogloboquadrina_dutertrei_NA_NA_NA;KM193743_Non-Spinose_Neogloboquadrina_dutertrei_NA_NA_NA;AB468839_Non-Spinose_Neogloboquadrina_dutertrei_NA_NA_NA;	Non-Spinose	Neogloboquadrina	dutertrei	I	Non-Spinose_Neogloboquadrina_dutertrei_I
ISU417	1	3	NO	-	0	0	0	0	0	3	0	0	0	0	0	0	0	0	0	0	0	0	0	0	0	0	0	0	0	0	0	0	0	0	0	3	Microperforates_Globigerinita_glutinata	Microperforates	Globigerinita	glutinata	-	JQ799900_Microperforates_Globigerinita_glutinata_IV_NA_NA;FJ643296_Microperforates_Globigerinita_glutinata_III_NA_NA;FJ643277_Microperforates_Globigerinita_glutinata_III_NA_NA;KM193199_Microperforates_Globigerinita_glutinata_NA_NA_NA;AY453136_Microperforates_Globigerinita_glutinata_III_NA_NA;	-	-	-	-	-
ISU418	1	2	NO	-	0	0	0	0	0	0	0	0	0	0	2	0	0	0	0	0	0	0	0	0	0	0	0	0	0	0	0	0	0	0	0	1	Non-Spinose_Neogloboquadrina_pachyderma_I_NA_NA	Non-Spinose	Neogloboquadrina	pachyderma	I	NAAY305329_Non-Spinose_Neogloboquadrina_pachyderma_I_NA_NA;	-	-	-	-	-
ISU419	1	99	Yes	R-123_1_99_5	0	0	0	0	0	99	0	0	0	0	0	0	0	0	0	0	0	0	0	0	0	0	0	0	0	0	0	0	0	0	0	5	Microperforates_Globigerinita_glutinata	Microperforates	Globigerinita	glutinata	-	FJ643294_Microperforates_Globigerinita_glutinata_I_NA_NA;FJ643286_Microperforates_Globigerinita_glutinata_I_NA_NA;KM193484_Microperforates_Globigerinita_glutinata_NA_NA_NA;KM193497_Microperforates_Globigerinita_glutinata_NA_NA_NA;FJ643283_Microperforates_Globigerinita_glutinata_III_NA_NA;KM193151_Microperforates_Globigerinita_glutinata_NA_NA_NA	Microperforates	Globigerinita	glutinata	III	Microperforates_Globigerinita_glutinata_III
ISU42	1	2	NO	-	0	0	0	0	0	0	0	0	0	0	0	0	0	0	0	0	0	0	0	2	0	0	0	0	0	0	0	0	0	0	0	1	Microperforates_Globigerinita_glutinata	Microperforates	Globigerinita	glutinata	-	JQ799900_Microperforates_Globigerinita_glutinata_IV_NA_NA;FJ643296_Microperforates_Globigerinita_glutinata_III_NA_NA;KM193199_Microperforates_Globigerinita_glutinata_NA_NA_NA;AY453136_Microperforates_Globigerinita_glutinata_III_NA_NA	-	-	-	-	-
ISU420	4	57	Yes	R-170_4_57_1	0	0	0	0	0	24	0	0	0	0	0	0	0	0	0	0	0	0	8	10	0	15	0	0	0	0	0	0	0	0	0	1	Microperforates_Globigerinita_glutinata_III_NA_NA	Microperforates	Globigerinita	glutinata	III	NAFJ643283_Microperforates_Globigerinita_glutinata_III_NA_NA;	Microperforates	Globigerinita	glutinata	III	Microperforates_Globigerinita_glutinata_III
ISU421	1	2	NO	-	0	0	0	0	0	0	0	0	0	0	0	0	0	0	0	0	0	0	0	2	0	0	0	0	0	0	0	0	0	0	0	2	Microperforates_Globigerinita_glutinata_III_NA_NA	Microperforates	Globigerinita	glutinata	III	NAFJ643283_Microperforates_Globigerinita_glutinata_III_NA_NA;	-	-	-	-	-
ISU422	6	3746	Yes	R-18_6_3746_0	0	0	0	45	0	626	0	0	0	0	0	0	0	0	0	0	0	0	209	483	0	2381	2	0	0	0	0	0	0	0	0	0	Spinose_Globigerina_bulloides	Spinose	Globigerina	bulloides	-	GQ293072_Spinose_Globigerina_bulloides_I_c_NA;GU060421_Spinose_Globigerina_bulloides_I_e_NA;Z83957_Spinose_Globigerina_bulloides_NA_NA_NA;GQ293070_Spinose_Globigerina_bulloides_I_d_NA	Spinose	Globigerina	bulloides	I	Spinose_Globigerina_bulloides_I
ISU423	3	7	Yes	R-539_3_7_1	0	0	0	0	2	0	0	0	0	0	0	0	0	0	0	0	0	0	3	2	0	0	0	0	0	0	0	0	0	0	0	1	Microperforates_Globigerinita_glutinata	Microperforates	Globigerinita	glutinata	-	FJ643296_Microperforates_Globigerinita_glutinata_III_NA_NA;KM193199_Microperforates_Globigerinita_glutinata_NA_NA_NA;FJ643277_Microperforates_Globigerinita_glutinata_III_NA_NA;AY453136_Microperforates_Globigerinita_glutinata_III_NA_NA;JQ799900_Microperforates_Globigerinita_glutinata_IV_NA_NA;	Microperforates	Globigerinita	glutinata	III	Microperforates_Globigerinita_glutinata_III
ISU424	1	2	NO	-	0	0	0	0	0	0	0	0	0	0	0	0	0	0	0	0	0	0	0	0	0	2	0	0	0	0	0	0	0	0	0	1	Spinose_Globigerina_falconensis_NA_NA_NA	Spinose	Globigerina	falconensis	NA	NAAF387172_Spinose_Globigerina_falconensis_NA_NA_NA;	-	-	-	-	-
ISU425	1	2	NO	-	0	0	0	0	2	0	0	0	0	0	0	0	0	0	0	0	0	0	0	0	0	0	0	0	0	0	0	0	0	0	0	7	Microperforates_Globigerinita_uvula	Microperforates	Globigerinita	uvula	-	FJ643298_Microperforates_Globigerinita_uvula_I_NA_NA;KM193160_Microperforates_Globigerinita_uvula_NA_NA_NA;KM193079_Microperforates_Globigerinita_uvula_NA_NA_NA;KM193075_Microperforates_Globigerinita_uvula_NA_NA_NA;KM193070_Microperforates_Globigerinita_uvula_NA_NA_NA;	-	-	-	-	-
ISU426	1	2	NO	-	0	0	0	0	0	0	0	0	0	0	0	0	0	0	0	0	0	0	0	0	0	2	0	0	0	0	0	0	0	0	0	1	Microperforates_Globigerinita_glutinata_III_NA_NA	Microperforates	Globigerinita	glutinata	III	NAFJ643277_Microperforates_Globigerinita_glutinata_III_NA_NA;	-	-	-	-	-
ISU427	2	4	Yes	R-657_2_4_1	0	0	0	0	0	2	0	0	0	0	0	0	0	0	0	0	0	0	0	0	0	2	0	0	0	0	0	0	0	0	0	1	Microperforates_Globigerinita_uvula	Microperforates	Globigerinita	uvula	-	FJ643298_Microperforates_Globigerinita_uvula_I_NA_NA;KM193070_Microperforates_Globigerinita_uvula_NA_NA_NA;KM193079_Microperforates_Globigerinita_uvula_NA_NA_NA;	Microperforates	Globigerinita	glutinata	III	Microperforates_Globigerinita_glutinata_III
ISU428	3	12	Yes	R-414_3_12_1	0	0	0	0	0	0	0	0	0	2	0	3	0	0	0	0	0	0	0	0	0	0	0	0	0	7	0	0	0	0	0	1	Non-Spinose_Neogloboquadrina_pachyderma_I_NA_NA	Non-Spinose	Neogloboquadrina	pachyderma	I	NAAY305329_Non-Spinose_Neogloboquadrina_pachyderma_I_NA_NA;	Non-Spinose	Neogloboquadrina	pachyderma	I	Non-Spinose_Neogloboquadrina_pachyderma_I
ISU429	1	28	Yes	R-273_1_28_2	0	0	0	0	0	28	0	0	0	0	0	0	0	0	0	0	0	0	0	0	0	0	0	0	0	0	0	0	0	0	0	2	Microperforates_Globigerinita_glutinata	Microperforates	Globigerinita	glutinata	-	JQ799900_Microperforates_Globigerinita_glutinata_IV_NA_NA;FJ643296_Microperforates_Globigerinita_glutinata_III_NA_NA;KM193199_Microperforates_Globigerinita_glutinata_NA_NA_NA;AY453136_Microperforates_Globigerinita_glutinata_III_NA_NA	Microperforates	Globigerinita	glutinata	III	Microperforates_Globigerinita_glutinata_III
ISU43	2	7	Yes	R-547_2_7_1	0	0	0	0	0	0	0	0	0	0	0	0	0	0	0	0	0	0	3	0	0	4	0	0	0	0	0	0	0	0	0	1	Microperforates_Globigerinita_glutinata_III_NA_NA	Microperforates	Globigerinita	glutinata	III	NAFJ643283_Microperforates_Globigerinita_glutinata_III_NA_NA;	Microperforates	Globigerinita	glutinata	III	Microperforates_Globigerinita_glutinata_III
ISU430	6	665	Yes	R-34_6_665_1	0	0	0	2	59	258	0	0	0	0	0	0	0	0	0	0	0	0	95	103	0	148	0	0	0	0	0	0	0	0	0	1	Microperforates_Globigerinita_glutinata_III_NA_NA	Microperforates	Globigerinita	glutinata	III	NAFJ643283_Microperforates_Globigerinita_glutinata_III_NA_NA;	Microperforates	Globigerinita	glutinata	III	Microperforates_Globigerinita_glutinata_III
ISU431	4	41	Yes	R-222_4_41_2	0	0	0	0	0	8	0	0	0	0	0	0	0	0	0	0	0	0	8	18	0	7	0	0	0	0	0	0	0	0	0	2	Microperforates_Globigerinita_glutinata_II_NA_NA	Microperforates	Globigerinita	glutinata	II	NAAB468833_Microperforates_Globigerinita_glutinata_II_NA_NA;	Microperforates	Globigerinita	glutinata	II	Microperforates_Globigerinita_glutinata_II
ISU432	1	2	NO	-	0	0	0	0	0	0	0	0	0	0	0	0	0	0	0	0	0	0	2	0	0	0	0	0	0	0	0	0	0	0	0	1	Microperforates_Globigerinita_uvula	Microperforates	Globigerinita	uvula	-	FJ643298_Microperforates_Globigerinita_uvula_I_NA_NA;KM193070_Microperforates_Globigerinita_uvula_NA_NA_NA;KM193079_Microperforates_Globigerinita_uvula_NA_NA_NA;	-	-	-	-	-
ISU433	4	111	Yes	R-112_4_111_5	0	0	0	0	71	36	0	0	0	0	0	0	0	0	0	0	0	0	2	0	0	2	0	0	0	0	0	0	0	0	0	5	Microperforates_Globigerinita_uvula	Microperforates	Globigerinita	uvula	-	FJ643298_Microperforates_Globigerinita_uvula_I_NA_NA;KM193160_Microperforates_Globigerinita_uvula_NA_NA_NA;KM193079_Microperforates_Globigerinita_uvula_NA_NA_NA;KM193075_Microperforates_Globigerinita_uvula_NA_NA_NA;KM193070_Microperforates_Globigerinita_uvula_NA_NA_NA;	Microperforates	Globigerinita	uvula	I	Microperforates_Globigerinita_uvula_I
ISU434	5	340	Yes	R-50_5_340_1	0	0	0	0	4	8	0	0	0	0	0	0	0	0	0	0	0	0	7	312	0	9	0	0	0	0	0	0	0	0	0	1	Microperforates_Globigerinita_glutinata	Microperforates	Globigerinita	glutinata	-	FJ643296_Microperforates_Globigerinita_glutinata_III_NA_NA;KM193199_Microperforates_Globigerinita_glutinata_NA_NA_NA;FJ643277_Microperforates_Globigerinita_glutinata_III_NA_NA;AY453136_Microperforates_Globigerinita_glutinata_III_NA_NA;JQ799900_Microperforates_Globigerinita_glutinata_IV_NA_NA;	Microperforates	Globigerinita	glutinata	III	Microperforates_Globigerinita_glutinata_III
ISU435	1	6	NO	-	0	0	0	0	0	0	0	0	0	0	0	0	0	0	0	0	0	0	0	0	0	0	0	0	0	0	0	0	6	0	0	1	Non-Spinose_Neogloboquadrina_pachyderma_IV_NA_NA	Non-Spinose	Neogloboquadrina	pachyderma	IV	NAKM193680_Non-Spinose_Neogloboquadrina_pachyderma_IV_NA_NA;	-	-	-	-	-
ISU436	1	3	NO	-	0	0	0	0	0	0	0	0	0	0	0	0	0	0	0	0	0	0	3	0	0	0	0	0	0	0	0	0	0	0	0	8	Microperforates_Globigerinita_uvula	Microperforates	Globigerinita	uvula	-	FJ643298_Microperforates_Globigerinita_uvula_I_NA_NA;KM193070_Microperforates_Globigerinita_uvula_NA_NA_NA;KM193079_Microperforates_Globigerinita_uvula_NA_NA_NA;	-	-	-	-	-
ISU437	3	7	Yes	R-530_3_7_5	0	0	0	0	0	2	0	0	0	0	0	0	0	0	0	0	0	0	3	2	0	0	0	0	0	0	0	0	0	0	0	5	Microperforates_Globigerinita_uvula	Microperforates	Globigerinita	uvula	-	FJ643298_Microperforates_Globigerinita_uvula_I_NA_NA;KM193079_Microperforates_Globigerinita_uvula_NA_NA_NA;KM193070_Microperforates_Globigerinita_uvula_NA_NA_NA;	Microperforates	Globigerinita	uvula	I	Microperforates_Globigerinita_uvula_I
ISU438	2	4	Yes	R-676_2_4_1	0	0	0	0	0	0	0	0	0	2	2	0	0	0	0	0	0	0	0	0	0	0	0	0	0	0	0	0	0	0	0	1	Non-Spinose_Neogloboquadrina_pachyderma_I_NA_NA	Non-Spinose	Neogloboquadrina	pachyderma	I	NAAY305329_Non-Spinose_Neogloboquadrina_pachyderma_I_NA_NA;	Non-Spinose	Neogloboquadrina	pachyderma	I	Non-Spinose_Neogloboquadrina_pachyderma_I
ISU439	4	24	Yes	R-293_4_24_3	0	0	0	0	3	4	0	0	0	0	0	0	0	0	0	0	0	0	0	2	0	15	0	0	0	0	0	0	0	0	0	3	Microperforates_Globigerinita_glutinata	Microperforates	Globigerinita	glutinata	-	KM193151_Microperforates_Globigerinita_glutinata_NA_NA_NA;KM193497_Microperforates_Globigerinita_glutinata_NA_NA_NA;FJ643294_Microperforates_Globigerinita_glutinata_I_NA_NA;	Microperforates	Globigerinita	glutinata	I	Microperforates_Globigerinita_glutinata_I
ISU44	1	2	NO	-	0	0	0	0	0	0	0	0	0	0	0	0	0	0	0	0	0	0	0	2	0	0	0	0	0	0	0	0	0	0	0	2	Microperforates_Globigerinita_glutinata	Microperforates	Globigerinita	glutinata	-	JQ799900_Microperforates_Globigerinita_glutinata_IV_NA_NA;FJ643296_Microperforates_Globigerinita_glutinata_III_NA_NA;KM193199_Microperforates_Globigerinita_glutinata_NA_NA_NA;AY453136_Microperforates_Globigerinita_glutinata_III_NA_NA	-	-	-	-	-
ISU440	1	2	NO	-	0	0	0	0	0	0	0	0	0	0	0	0	0	0	0	0	0	0	0	0	0	0	0	0	0	0	0	0	2	0	0	1	Non-Spinose_Neogloboquadrina_pachyderma_IV_NA_NA	Non-Spinose	Neogloboquadrina	pachyderma	IV	NAKM193680_Non-Spinose_Neogloboquadrina_pachyderma_IV_NA_NA;	-	-	-	-	-
ISU441	3	304	Yes	R-53_3_304_0	0	0	0	0	0	3	18	0	0	0	0	0	0	0	0	0	0	0	0	283	0	0	0	0	0	0	0	0	0	0	0	0	Non-Spinose_Neogloboquadrina_dutertrei_NA_NA_NA	Non-Spinose	Neogloboquadrina	dutertrei	NA	NAAB263438_Non-Spinose_Neogloboquadrina_dutertrei_NA_NA_NA;AB263437_Non-Spinose_Neogloboquadrina_dutertrei_NA_NA_NA;KM193447_Non-Spinose_Neogloboquadrina_dutertrei_NA_NA_NA;U65635_Non-Spinose_Neogloboquadrina_dutertrei_NA_NA_NA;KM194101_Non-Spinose_Neogloboquadrina_dutertrei_NA_NA_NA;	Non-Spinose	Neogloboquadrina	dutertrei	I	Non-Spinose_Neogloboquadrina_dutertrei_I
ISU442	4	42	Yes	R-218_4_42_1	0	0	0	0	0	10	0	0	0	0	0	0	0	0	0	0	0	0	8	11	0	13	0	0	0	0	0	0	0	0	0	1	Microperforates_Globigerinita_glutinata	Microperforates	Globigerinita	glutinata	-	JQ799900_Microperforates_Globigerinita_glutinata_IV_NA_NA;FJ643296_Microperforates_Globigerinita_glutinata_III_NA_NA;KM193199_Microperforates_Globigerinita_glutinata_NA_NA_NA;AY453136_Microperforates_Globigerinita_glutinata_III_NA_NA	Microperforates	Globigerinita	glutinata	III	Microperforates_Globigerinita_glutinata_III
ISU443	3	18	Yes	R-350_3_18_1	0	0	0	0	0	6	0	0	0	0	0	0	0	0	0	0	0	0	6	0	0	6	0	0	0	0	0	0	0	0	0	1	Microperforates_Globigerinita_glutinata	Microperforates	Globigerinita	glutinata	-	JQ799900_Microperforates_Globigerinita_glutinata_IV_NA_NA;FJ643296_Microperforates_Globigerinita_glutinata_III_NA_NA;KM193199_Microperforates_Globigerinita_glutinata_NA_NA_NA;AY453136_Microperforates_Globigerinita_glutinata_III_NA_NA	Microperforates	Globigerinita	glutinata	III	Microperforates_Globigerinita_glutinata_III
ISU444	2	4	Yes	R-686_2_4_6	0	0	0	0	0	2	0	0	0	0	0	0	0	0	0	0	0	0	0	0	0	2	0	0	0	0	0	0	0	0	0	6	Microperforates_Globigerinita_glutinata	Microperforates	Globigerinita	glutinata	-	FJ643286_Microperforates_Globigerinita_glutinata_I_NA_NA;KM193484_Microperforates_Globigerinita_glutinata_NA_NA_NA	Microperforates	Globigerinita	glutinata	III	Microperforates_Globigerinita_glutinata_III
ISU445	1	8	NO	-	0	0	0	0	0	0	0	0	0	0	0	0	0	0	0	0	0	0	0	0	0	0	0	0	0	0	0	0	8	0	0	1	Non-Spinose_Neogloboquadrina_pachyderma_IV_NA_NA	Non-Spinose	Neogloboquadrina	pachyderma	IV	NAKM193680_Non-Spinose_Neogloboquadrina_pachyderma_IV_NA_NA;	-	-	-	-	-
ISU446	5	18	Yes	R-347_5_18_1	0	0	0	0	3	4	0	0	0	0	0	0	0	0	0	0	0	0	4	3	0	4	0	0	0	0	0	0	0	0	0	1	Microperforates_Globigerinita_glutinata	Microperforates	Globigerinita	glutinata	-	FJ643296_Microperforates_Globigerinita_glutinata_III_NA_NA;KM193199_Microperforates_Globigerinita_glutinata_NA_NA_NA;FJ643277_Microperforates_Globigerinita_glutinata_III_NA_NA;AY453136_Microperforates_Globigerinita_glutinata_III_NA_NA;JQ799900_Microperforates_Globigerinita_glutinata_IV_NA_NA;	Microperforates	Globigerinita	glutinata	III	Microperforates_Globigerinita_glutinata_III
ISU447	1	2	NO	-	0	0	0	0	0	0	0	0	0	0	0	0	0	0	0	0	0	0	2	0	0	0	0	0	0	0	0	0	0	0	0	1	Microperforates_Globigerinita_glutinata	Microperforates	Globigerinita	glutinata	-	JQ799900_Microperforates_Globigerinita_glutinata_IV_NA_NA;FJ643296_Microperforates_Globigerinita_glutinata_III_NA_NA;FJ643277_Microperforates_Globigerinita_glutinata_III_NA_NA;KM193199_Microperforates_Globigerinita_glutinata_NA_NA_NA;AY453136_Microperforates_Globigerinita_glutinata_III_NA_NA;	-	-	-	-	-
ISU448	1	207	Yes	R-75_1_207_1	0	0	0	0	0	0	0	0	0	0	0	0	0	0	0	0	0	0	0	0	0	0	0	0	0	207	0	0	0	0	0	1	Non-Spinose_Neogloboquadrina_pachyderma_I_NA_NA	Non-Spinose	Neogloboquadrina	pachyderma	I	NAAY305329_Non-Spinose_Neogloboquadrina_pachyderma_I_NA_NA;	Non-Spinose	Neogloboquadrina	pachyderma	U2	Non-Spinose_Neogloboquadrina_pachyderma_U2
ISU449	1	2	NO	-	0	0	0	0	0	2	0	0	0	0	0	0	0	0	0	0	0	0	0	0	0	0	0	0	0	0	0	0	0	0	0	1	Microperforates_Globigerinita_glutinata	Microperforates	Globigerinita	glutinata	-	JQ799900_Microperforates_Globigerinita_glutinata_IV_NA_NA;FJ643296_Microperforates_Globigerinita_glutinata_III_NA_NA;KM193199_Microperforates_Globigerinita_glutinata_NA_NA_NA;AY453136_Microperforates_Globigerinita_glutinata_III_NA_NA	-	-	-	-	-
ISU45	6	114	Yes	R-109_6_114_5	0	0	0	0	7	63	0	0	0	3	0	0	0	0	0	0	0	0	10	18	0	13	0	0	0	0	0	0	0	0	0	5	Microperforates_Globigerinita_glutinata	Microperforates	Globigerinita	glutinata	-	KM193484_Microperforates_Globigerinita_glutinata_NA_NA_NA;FJ643286_Microperforates_Globigerinita_glutinata_I_NA_NA	Microperforates	Globigerinita	glutinata	I	Microperforates_Globigerinita_glutinata_I
ISU450	4	18	Yes	R-346_4_18_2	0	0	0	0	0	5	0	0	0	0	0	0	0	0	0	0	0	0	2	4	0	7	0	0	0	0	0	0	0	0	0	2	Microperforates_Globigerinita_glutinata	Microperforates	Globigerinita	glutinata	-	JQ799900_Microperforates_Globigerinita_glutinata_IV_NA_NA;FJ643296_Microperforates_Globigerinita_glutinata_III_NA_NA;FJ643277_Microperforates_Globigerinita_glutinata_III_NA_NA;KM193199_Microperforates_Globigerinita_glutinata_NA_NA_NA;AY453136_Microperforates_Globigerinita_glutinata_III_NA_NA;	Microperforates	Globigerinita	glutinata	III	Microperforates_Globigerinita_glutinata_III
ISU451	3	24	Yes	R-292_3_24_6	0	0	0	0	0	15	0	0	0	0	0	0	0	0	0	0	0	0	0	6	0	3	0	0	0	0	0	0	0	0	0	6	Microperforates_Globigerinita_glutinata	Microperforates	Globigerinita	glutinata	-	FJ643286_Microperforates_Globigerinita_glutinata_I_NA_NA;KM193484_Microperforates_Globigerinita_glutinata_NA_NA_NA	Microperforates	Globigerinita	glutinata	III	Microperforates_Globigerinita_glutinata_III
ISU452	6	163	Yes	R-88_6_163_4	0	0	0	2	6	31	0	0	0	0	0	0	0	0	0	0	0	0	15	89	0	20	0	0	0	0	0	0	0	0	0	4	Microperforates_Globigerinita_glutinata_III_NA_NA	Microperforates	Globigerinita	glutinata	III	NAFJ643283_Microperforates_Globigerinita_glutinata_III_NA_NA;	Microperforates	Globigerinita	glutinata	III	Microperforates_Globigerinita_glutinata_III
ISU453	1	56	Yes	R-171_1_56_9	0	0	0	0	0	0	0	0	0	0	0	0	0	0	0	0	0	0	0	56	0	0	0	0	0	0	0	0	0	0	0	9	Non-Spinose_Globorotalia_hirsuta_NA_NA_NA	Non-Spinose	Globorotalia	hirsuta	NA	NAKM193071_Non-Spinose_Globorotalia_hirsuta_NA_NA_NA;KM193072_Non-Spinose_Globorotalia_hirsuta_NA_NA_NA	Non-Spinose	Globorotalia	hirsuta	U1	Non-Spinose_Globorotalia_hirsuta_U1
ISU454	1	2	NO	-	0	0	0	0	0	0	0	0	0	0	0	0	0	0	0	0	0	0	0	0	0	2	0	0	0	0	0	0	0	0	0	1	Microperforates_Globigerinita_glutinata_II_NA_NA	Microperforates	Globigerinita	glutinata	II	NAAB468826_Microperforates_Globigerinita_glutinata_II_NA_NA;	-	-	-	-	-
ISU455	2	5	Yes	R-610_2_5_4	0	0	0	0	0	2	0	0	0	0	0	0	0	0	0	0	0	0	0	3	0	0	0	0	0	0	0	0	0	0	0	4	Microperforates_Globigerinita_glutinata	Microperforates	Globigerinita	glutinata	-	FJ643286_Microperforates_Globigerinita_glutinata_I_NA_NA;KM193484_Microperforates_Globigerinita_glutinata_NA_NA_NA	Microperforates	Candeina	nitida	I	Microperforates_Candeina_nitida_I
ISU456	1	2	NO	-	0	0	2	0	0	0	0	0	0	0	0	0	0	0	0	0	0	0	0	0	0	0	0	0	0	0	0	0	0	0	0	8	Non-Spiral_Galietelia_vivans_NA_NA_NA	Non-Spiral	Galietelia	vivans	NA	NAAB364519_Non-Spiral_Galietelia_vivans_NA_NA_NA;AB364517_Non-Spiral_Galietelia_vivans_NA_NA_NA;AB364518_Non-Spiral_Galietelia_vivans_NA_NA_NA;	-	-	-	-	-
ISU457	4	23	Yes	R-302_4_23_1	0	0	0	0	0	2	0	0	0	0	0	0	0	0	0	0	0	0	9	10	0	2	0	0	0	0	0	0	0	0	0	1	Microperforates_Globigerinita_glutinata_III_NA_NA	Microperforates	Globigerinita	glutinata	III	NAFJ643283_Microperforates_Globigerinita_glutinata_III_NA_NA;	Microperforates	Globigerinita	glutinata	III	Microperforates_Globigerinita_glutinata_III
ISU458	1	3	NO	-	0	0	0	0	0	0	0	0	0	0	0	0	0	0	0	0	0	0	0	0	0	3	0	0	0	0	0	0	0	0	0	1	Spinose_Globigerina_bulloides	Spinose	Globigerina	bulloides	-	GQ293072_Spinose_Globigerina_bulloides_I_c_NA;GU060421_Spinose_Globigerina_bulloides_I_e_NA;GQ293070_Spinose_Globigerina_bulloides_I_d_NA;Z83957_Spinose_Globigerina_bulloides_NA_NA_NA	-	-	-	-	-
ISU459	1	3	NO	-	0	0	0	0	0	0	0	0	0	0	0	0	0	0	0	0	0	0	0	0	0	0	0	0	0	0	0	0	3	0	0	1	Non-Spinose_Neogloboquadrina_pachyderma_IV_NA_NA	Non-Spinose	Neogloboquadrina	pachyderma	IV	NAKM193680_Non-Spinose_Neogloboquadrina_pachyderma_IV_NA_NA;	-	-	-	-	-
ISU46	2	5	Yes	R-624_2_5_1	0	0	0	0	0	0	0	0	0	2	3	0	0	0	0	0	0	0	0	0	0	0	0	0	0	0	0	0	0	0	0	1	Non-Spinose_Neogloboquadrina_pachyderma_I_NA_NA	Non-Spinose	Neogloboquadrina	pachyderma	I	NAAY305329_Non-Spinose_Neogloboquadrina_pachyderma_I_NA_NA;	Non-Spinose	Neogloboquadrina	pachyderma	I	Non-Spinose_Neogloboquadrina_pachyderma_I
ISU460	1	2	NO	-	0	0	0	0	0	0	0	0	0	0	0	0	0	0	0	0	0	0	0	2	0	0	0	0	0	0	0	0	0	0	0	5	Microperforates_Globigerinita_glutinata	Microperforates	Globigerinita	glutinata	-	JQ799900_Microperforates_Globigerinita_glutinata_IV_NA_NA;FJ643288_Microperforates_Globigerinita_glutinata_I_NA_NA;KM193539_Microperforates_Globigerinita_glutinata_NA_NA_NA;FJ643296_Microperforates_Globigerinita_glutinata_III_NA_NA;FJ643277_Microperforates_Globigerinita_glutinata_III_NA_NA;KM193303_Microperforates_Globigerinita_glutinata_NA_NA_NA;KM193199_Microperforates_Globigerinita_glutinata_N…	-	-	-	-	-
ISU461	1	2	NO	-	0	0	0	0	0	0	0	0	0	0	0	0	0	0	0	0	0	0	0	0	0	0	0	2	0	0	0	0	0	0	0	9	Microperforates_Globigerinita_glutinata_NA_NA_NA	Microperforates	Globigerinita	glutinata	NA	NAKM193423_Microperforates_Globigerinita_glutinata_NA_NA_NA;	-	-	-	-	-
ISU462	1	2	NO	-	0	0	0	0	0	0	0	0	0	0	0	0	0	0	0	0	0	0	0	0	0	2	0	0	0	0	0	0	0	0	0	1	Spinose_Globigerina_bulloides	Spinose	Globigerina	bulloides	-	GQ293072_Spinose_Globigerina_bulloides_I_c_NA;GU060421_Spinose_Globigerina_bulloides_I_e_NA;GQ293070_Spinose_Globigerina_bulloides_I_d_NA;Z83957_Spinose_Globigerina_bulloides_NA_NA_NA	-	-	-	-	-
ISU463	3	12	Yes	R-419_3_12_1	0	0	0	0	0	8	0	0	0	0	0	0	0	0	0	0	0	0	2	2	0	0	0	0	0	0	0	0	0	0	0	1	Microperforates_Candeina_nitida_NA_NA_NA	Microperforates	Candeina	nitida	NA	NAAB263435_Microperforates_Candeina_nitida_NA_NA_NA;	Microperforates	Candeina	nitida	I	Microperforates_Candeina_nitida_I
ISU464	1	3	NO	-	0	0	0	0	0	0	0	0	0	0	0	0	0	0	0	0	0	0	0	0	0	3	0	0	0	0	0	0	0	0	0	4	Microperforates_Globigerinita_uvula	Microperforates	Globigerinita	uvula	-	KM193079_Microperforates_Globigerinita_uvula_NA_NA_NA;KM193160_Microperforates_Globigerinita_uvula_NA_NA_NA;FJ643298_Microperforates_Globigerinita_uvula_I_NA_NA;KM193075_Microperforates_Globigerinita_uvula_NA_NA_NA;KM193070_Microperforates_Globigerinita_uvula_NA_NA_NA;	-	-	-	-	-
ISU465	1	2	NO	-	0	0	0	0	0	0	0	0	0	0	0	0	0	0	0	0	0	0	0	2	0	0	0	0	0	0	0	0	0	0	0	1	Microperforates_Globigerinita_glutinata	Microperforates	Globigerinita	glutinata	-	FJ643418_Microperforates_Globigerinita_glutinata_NA_NA_NA;AB468827_Microperforates_Globigerinita_glutinata_II_NA_NA;AB468829_Microperforates_Globigerinita_glutinata_II_NA_NA;	-	-	-	-	-
ISU466	1	2	NO	-	0	0	0	0	0	0	0	0	0	0	0	0	0	0	0	0	0	0	0	0	0	2	0	0	0	0	0	0	0	0	0	5	Microperforates_Globigerinita_glutinata	Microperforates	Globigerinita	glutinata	-	FJ643277_Microperforates_Globigerinita_glutinata_III_NA_NA;FJ643296_Microperforates_Globigerinita_glutinata_III_NA_NA;JQ799900_Microperforates_Globigerinita_glutinata_IV_NA_NA;KM193539_Microperforates_Globigerinita_glutinata_NA_NA_NA;KM193303_Microperforates_Globigerinita_glutinata_NA_NA_NA;KM193199_Microperforates_Globigerinita_glutinata_NA_NA_NA;AY453136_Microperforates_Globigerinita_glutinata_…	-	-	-	-	-
ISU467	4	1567	Yes	R-23_4_1567_1	0	0	0	66	686	517	0	0	0	0	0	0	0	0	0	0	0	0	0	0	0	298	0	0	0	0	0	0	0	0	0	1	Microperforates_Globigerinita_uvula	Microperforates	Globigerinita	uvula	-	KM193070_Microperforates_Globigerinita_uvula_NA_NA_NA;FJ643298_Microperforates_Globigerinita_uvula_I_NA_NA;KM193079_Microperforates_Globigerinita_uvula_NA_NA_NA;	Microperforates	Globigerinita	uvula	I	Microperforates_Globigerinita_uvula_I
ISU468	1	3	NO	-	0	0	0	0	0	3	0	0	0	0	0	0	0	0	0	0	0	0	0	0	0	0	0	0	0	0	0	0	0	0	0	5	Microperforates_Globigerinita_uvula	Microperforates	Globigerinita	uvula	-	FJ643298_Microperforates_Globigerinita_uvula_I_NA_NA;KM193079_Microperforates_Globigerinita_uvula_NA_NA_NA;KM193070_Microperforates_Globigerinita_uvula_NA_NA_NA;	-	-	-	-	-
ISU469	4	19	Yes	R-337_4_19_1	0	0	0	0	0	6	0	0	0	0	0	0	0	0	0	0	0	0	5	4	0	4	0	0	0	0	0	0	0	0	0	1	Microperforates_Globigerinita_glutinata	Microperforates	Globigerinita	glutinata	-	JQ799900_Microperforates_Globigerinita_glutinata_IV_NA_NA;FJ643296_Microperforates_Globigerinita_glutinata_III_NA_NA;KM193199_Microperforates_Globigerinita_glutinata_NA_NA_NA;AY453136_Microperforates_Globigerinita_glutinata_III_NA_NA	Microperforates	Globigerinita	glutinata	III	Microperforates_Globigerinita_glutinata_III
ISU47	3	12	Yes	R-411_3_12_5	0	0	0	0	0	3	0	0	0	0	0	0	0	0	0	0	0	0	3	6	0	0	0	0	0	0	0	0	0	0	0	5	Microperforates_Globigerinita_uvula	Microperforates	Globigerinita	uvula	-	FJ643298_Microperforates_Globigerinita_uvula_I_NA_NA;KM193079_Microperforates_Globigerinita_uvula_NA_NA_NA;KM193070_Microperforates_Globigerinita_uvula_NA_NA_NA;	Microperforates	Globigerinita	uvula	I	Microperforates_Globigerinita_uvula_I
ISU470	3	12	Yes	R-429_3_12_1	0	0	0	0	0	2	0	0	0	0	0	0	0	0	0	0	0	0	0	7	0	3	0	0	0	0	0	0	0	0	0	1	Microperforates_Globigerinita_glutinata	Microperforates	Globigerinita	glutinata	-	JQ799900_Microperforates_Globigerinita_glutinata_IV_NA_NA;FJ643296_Microperforates_Globigerinita_glutinata_III_NA_NA;KM193199_Microperforates_Globigerinita_glutinata_NA_NA_NA;AY453136_Microperforates_Globigerinita_glutinata_III_NA_NA	Microperforates	Globigerinita	glutinata	II	Microperforates_Globigerinita_glutinata_II
ISU471	1	12	Yes	R-413_1_12_0	0	0	0	0	12	0	0	0	0	0	0	0	0	0	0	0	0	0	0	0	0	0	0	0	0	0	0	0	0	0	0	0	Non-Spinose_Pulleniatina_obliquiloculata	Non-Spinose	Pulleniatina	obliquiloculata	-	AB468841_Non-Spinose_Pulleniatina_obliquiloculata_NA_NA_NA;AB636735_Non-Spinose_Pulleniatina_obliquiloculata_I_NA_NA;AB636921_Non-Spinose_Pulleniatina_obliquiloculata_NA_NA_NA;AB636711_Non-Spinose_Pulleniatina_obliquiloculata_II_a_NA;AB636712_Non-Spinose_Pulleniatina_obliquiloculata_II_b_NA;	Non-Spinose	Pulleniatina	obliquiloculata	II	Non-Spinose_Pulleniatina_obliquiloculata_II
ISU472	1	2	NO	-	0	0	0	0	0	0	0	0	0	0	0	0	0	0	0	0	0	0	0	0	0	0	0	0	0	0	0	0	2	0	0	1	Non-Spinose_Neogloboquadrina_pachyderma_IV_NA_NA	Non-Spinose	Neogloboquadrina	pachyderma	IV	NAKM193680_Non-Spinose_Neogloboquadrina_pachyderma_IV_NA_NA;	-	-	-	-	-
ISU473	1	3	NO	-	0	0	0	0	0	3	0	0	0	0	0	0	0	0	0	0	0	0	0	0	0	0	0	0	0	0	0	0	0	0	0	1	Monolamellar_Hastigerina_pelagica	Monolamellar	Hastigerina	pelagica	-	FJ643408_Monolamellar_Hastigerina_pelagica_II_a_NA;KM194103_Monolamellar_Hastigerina_pelagica_NA_NA_NA;FJ643367_Monolamellar_Hastigerina_pelagica_II_a_NA;FJ643402_Monolamellar_Hastigerina_pelagica_NA_NA_NA	-	-	-	-	-
ISU474	5	99	Yes	R-122_5_99_1	0	0	0	0	13	22	0	0	0	0	0	0	0	0	0	0	0	0	12	24	0	28	0	0	0	0	0	0	0	0	0	1	Microperforates_Globigerinita_glutinata	Microperforates	Globigerinita	glutinata	-	FJ643296_Microperforates_Globigerinita_glutinata_III_NA_NA;KM193199_Microperforates_Globigerinita_glutinata_NA_NA_NA;FJ643277_Microperforates_Globigerinita_glutinata_III_NA_NA;AY453136_Microperforates_Globigerinita_glutinata_III_NA_NA;JQ799900_Microperforates_Globigerinita_glutinata_IV_NA_NA;	Microperforates	Globigerinita	glutinata	III	Microperforates_Globigerinita_glutinata_III
ISU475	1	7	NO	-	7	0	0	0	0	0	0	0	0	0	0	0	0	0	0	0	0	0	0	0	0	0	0	0	0	0	0	0	0	0	0	1	Microperforates_Globigerinita_uvula	Microperforates	Globigerinita	uvula	-	KM193181_Microperforates_Globigerinita_uvula_NA_NA_NA;KM193691_Microperforates_Globigerinita_uvula_NA_NA_NA;KM193364_Microperforates_Globigerinita_uvula_NA_NA_NA;AF387173_Microperforates_Globigerinita_uvula_II_NA_NA;KM194324_Microperforates_Globigerinita_uvula_NA_NA_NA;	-	-	-	-	-
ISU476	1	2	NO	-	0	0	0	0	0	0	0	0	0	0	0	0	0	0	0	0	0	0	0	2	0	0	0	0	0	0	0	0	0	0	0	5	Microperforates_Globigerinita_glutinata	Microperforates	Globigerinita	glutinata	-	JQ799900_Microperforates_Globigerinita_glutinata_IV_NA_NA;FJ643296_Microperforates_Globigerinita_glutinata_III_NA_NA;FJ643277_Microperforates_Globigerinita_glutinata_III_NA_NA;KM193199_Microperforates_Globigerinita_glutinata_NA_NA_NA;AY453136_Microperforates_Globigerinita_glutinata_III_NA_NA;	-	-	-	-	-
ISU477	1	1425	Yes	R-24_1_1425_0	0	0	0	0	0	1425	0	0	0	0	0	0	0	0	0	0	0	0	0	0	0	0	0	0	0	0	0	0	0	0	0	0	Monolamellar_Hastigerina_pelagica	Monolamellar	Hastigerina	pelagica	-	FJ643367_Monolamellar_Hastigerina_pelagica_II_a_NA;FJ643402_Monolamellar_Hastigerina_pelagica_NA_NA_NA	Monolamellar	Hastigerina	pelagica	IIa	Monolamellar_Hastigerina_pelagica_IIa
ISU478	1	14	Yes	R-389_1_14_1	0	0	0	0	0	14	0	0	0	0	0	0	0	0	0	0	0	0	0	0	0	0	0	0	0	0	0	0	0	0	0	1	Monolamellar_Hastigerina_pelagica	Monolamellar	Hastigerina	pelagica	-	FJ643408_Monolamellar_Hastigerina_pelagica_II_a_NA;KM194103_Monolamellar_Hastigerina_pelagica_NA_NA_NA;FJ643367_Monolamellar_Hastigerina_pelagica_II_a_NA;FJ643402_Monolamellar_Hastigerina_pelagica_NA_NA_NA	Monolamellar	Hastigerina	pelagica	IIa	Monolamellar_Hastigerina_pelagica_IIa
ISU479	1	2	NO	-	0	0	0	0	0	2	0	0	0	0	0	0	0	0	0	0	0	0	0	0	0	0	0	0	0	0	0	0	0	0	0	4	Microperforates_Globigerinita_glutinata	Microperforates	Globigerinita	glutinata	-	FJ643286_Microperforates_Globigerinita_glutinata_I_NA_NA;KM193484_Microperforates_Globigerinita_glutinata_NA_NA_NA	-	-	-	-	-
ISU48	1	2	NO	-	0	0	0	0	0	0	0	0	0	0	0	0	0	0	0	0	0	0	0	2	0	0	0	0	0	0	0	0	0	0	0	2	Microperforates_Globigerinita_glutinata	Microperforates	Globigerinita	glutinata	-	JQ799900_Microperforates_Globigerinita_glutinata_IV_NA_NA;FJ643296_Microperforates_Globigerinita_glutinata_III_NA_NA;KM193199_Microperforates_Globigerinita_glutinata_NA_NA_NA;AY453136_Microperforates_Globigerinita_glutinata_III_NA_NA	-	-	-	-	-
ISU480	1	5	NO	-	0	0	0	0	0	0	0	0	0	0	0	0	0	0	0	0	0	0	0	5	0	0	0	0	0	0	0	0	0	0	0	2	Microperforates_Globigerinita_glutinata_III_NA_NA	Microperforates	Globigerinita	glutinata	III	NAFJ643277_Microperforates_Globigerinita_glutinata_III_NA_NA;	-	-	-	-	-
ISU481	1	3	NO	-	0	0	0	0	0	3	0	0	0	0	0	0	0	0	0	0	0	0	0	0	0	0	0	0	0	0	0	0	0	0	0	1	Monolamellar_Hastigerina_pelagica	Monolamellar	Hastigerina	pelagica	-	FJ643367_Monolamellar_Hastigerina_pelagica_II_a_NA;FJ643402_Monolamellar_Hastigerina_pelagica_NA_NA_NA	-	-	-	-	-
ISU482	4	119	Yes	R-107_4_119_1	0	0	0	0	0	80	0	0	0	0	0	0	0	0	0	0	0	0	9	13	0	17	0	0	0	0	0	0	0	0	0	1	Microperforates_Globigerinita_glutinata_III_NA_NA	Microperforates	Globigerinita	glutinata	III	NAFJ643283_Microperforates_Globigerinita_glutinata_III_NA_NA;	Microperforates	Globigerinita	glutinata	III	Microperforates_Globigerinita_glutinata_III
ISU483	3	14	Yes	R-391_3_14_5	0	0	0	0	3	7	0	0	0	0	0	0	0	0	0	0	0	0	0	4	0	0	0	0	0	0	0	0	0	0	0	5	Microperforates_Globigerinita_uvula	Microperforates	Globigerinita	uvula	-	FJ643298_Microperforates_Globigerinita_uvula_I_NA_NA;KM193160_Microperforates_Globigerinita_uvula_NA_NA_NA;KM193079_Microperforates_Globigerinita_uvula_NA_NA_NA;KM193075_Microperforates_Globigerinita_uvula_NA_NA_NA;KM193070_Microperforates_Globigerinita_uvula_NA_NA_NA;	Microperforates	Globigerinita	uvula	I	Microperforates_Globigerinita_uvula_I
ISU484	4	15	Yes	R-373_4_15_5	0	0	0	0	0	3	0	0	0	0	0	0	0	0	0	0	0	0	7	3	0	2	0	0	0	0	0	0	0	0	0	5	Microperforates_Globigerinita_uvula	Microperforates	Globigerinita	uvula	-	FJ643298_Microperforates_Globigerinita_uvula_I_NA_NA;KM193079_Microperforates_Globigerinita_uvula_NA_NA_NA;KM193070_Microperforates_Globigerinita_uvula_NA_NA_NA;	Microperforates	Globigerinita	uvula	I	Microperforates_Globigerinita_uvula_I
ISU485	5	928	Yes	R-25_5_928_1	0	0	0	0	6	26	0	0	0	0	0	0	0	0	0	0	0	0	13	864	0	19	0	0	0	0	0	0	0	0	0	1	Microperforates_Globigerinita_glutinata_III_NA_NA	Microperforates	Globigerinita	glutinata	III	NAFJ643283_Microperforates_Globigerinita_glutinata_III_NA_NA;	Microperforates	Globigerinita	glutinata	III	Microperforates_Globigerinita_glutinata_III
ISU486	1	2	NO	-	0	0	0	2	0	0	0	0	0	0	0	0	0	0	0	0	0	0	0	0	0	0	0	0	0	0	0	0	0	0	0	6	Microperforates_Candeina_nitida_NA_NA_NA	Microperforates	Candeina	nitida	NA	NAAB263435_Microperforates_Candeina_nitida_NA_NA_NA;AB468836_Microperforates_Candeina_nitida_NA_NA_NA;KJ633212_Microperforates_Candeina_nitida_NA_NA_NA;AB468837_Microperforates_Candeina_nitida_NA_NA_NA	-	-	-	-	-
ISU487	1	2	NO	-	0	0	0	0	0	0	0	0	0	0	0	2	0	0	0	0	0	0	0	0	0	0	0	0	0	0	0	0	0	0	0	2	Non-Spinose_Neogloboquadrina_pachyderma_I_NA_NA	Non-Spinose	Neogloboquadrina	pachyderma	I	NAAY305329_Non-Spinose_Neogloboquadrina_pachyderma_I_NA_NA;	-	-	-	-	-
ISU488	1	2	NO	-	0	0	0	0	0	0	0	0	0	0	0	0	0	0	0	0	0	0	0	2	0	0	0	0	0	0	0	0	0	0	0	2	Microperforates_Globigerinita_glutinata_III_NA_NA	Microperforates	Globigerinita	glutinata	III	NAFJ643283_Microperforates_Globigerinita_glutinata_III_NA_NA;	-	-	-	-	-
ISU489	4	19	Yes	R-340_4_19_1	0	0	0	0	0	4	0	0	0	0	0	0	0	0	0	0	0	0	3	5	0	7	0	0	0	0	0	0	0	0	0	1	Microperforates_Globigerinita_glutinata_III_NA_NA	Microperforates	Globigerinita	glutinata	III	NAFJ643283_Microperforates_Globigerinita_glutinata_III_NA_NA;	Microperforates	Globigerinita	glutinata	III	Microperforates_Globigerinita_glutinata_III
ISU49	2	8	Yes	R-507_2_8_4	0	0	0	0	0	0	0	0	0	0	0	0	0	0	0	0	0	0	0	3	0	5	0	0	0	0	0	0	0	0	0	4	Microperforates_Globigerinita_glutinata	Microperforates	Globigerinita	glutinata	-	FJ643294_Microperforates_Globigerinita_glutinata_I_NA_NA;KM193497_Microperforates_Globigerinita_glutinata_NA_NA_NA;FJ643283_Microperforates_Globigerinita_glutinata_III_NA_NA;KM193151_Microperforates_Globigerinita_glutinata_NA_NA_NA	Microperforates	Globigerinita	glutinata	I	Microperforates_Globigerinita_glutinata_I
ISU490	1	2	NO	-	0	0	0	0	0	0	0	0	0	0	0	0	0	0	0	0	0	0	0	0	0	2	0	0	0	0	0	0	0	0	0	7	Microperforates_Candeina_nitida_NA_NA_NA	Microperforates	Candeina	nitida	NA	NAAB468837_Microperforates_Candeina_nitida_NA_NA_NA;AB468836_Microperforates_Candeina_nitida_NA_NA_NA;KJ633212_Microperforates_Candeina_nitida_NA_NA_NA;AB263435_Microperforates_Candeina_nitida_NA_NA_NA	-	-	-	-	-
ISU491	4	36	Yes	R-237_4_36_1	0	0	0	0	0	19	0	0	0	0	0	0	0	0	0	0	0	0	4	3	0	10	0	0	0	0	0	0	0	0	0	1	Microperforates_Globigerinita_glutinata_III_NA_NA	Microperforates	Globigerinita	glutinata	III	NAFJ643283_Microperforates_Globigerinita_glutinata_III_NA_NA;	Microperforates	Globigerinita	glutinata	III	Microperforates_Globigerinita_glutinata_III
ISU492	2	5	Yes	R-618_2_5_1	0	0	0	0	0	0	0	0	0	0	3	2	0	0	0	0	0	0	0	0	0	0	0	0	0	0	0	0	0	0	0	1	Non-Spinose_Neogloboquadrina_pachyderma_I_NA_NA	Non-Spinose	Neogloboquadrina	pachyderma	I	NAAY305329_Non-Spinose_Neogloboquadrina_pachyderma_I_NA_NA;	Non-Spinose	Neogloboquadrina	pachyderma	I	Non-Spinose_Neogloboquadrina_pachyderma_I
ISU493	1	28	Yes	R-277_1_28_2	0	0	0	0	0	28	0	0	0	0	0	0	0	0	0	0	0	0	0	0	0	0	0	0	0	0	0	0	0	0	0	2	Microperforates_Globigerinita_glutinata	Microperforates	Globigerinita	glutinata	-	JQ799900_Microperforates_Globigerinita_glutinata_IV_NA_NA;FJ643296_Microperforates_Globigerinita_glutinata_III_NA_NA;KM193199_Microperforates_Globigerinita_glutinata_NA_NA_NA;AY453136_Microperforates_Globigerinita_glutinata_III_NA_NA	Microperforates	Globigerinita	glutinata	III	Microperforates_Globigerinita_glutinata_III
ISU494	1	2	NO	-	0	0	0	0	0	0	0	0	0	0	0	0	0	0	0	0	0	0	2	0	0	0	0	0	0	0	0	0	0	0	0	5	Microperforates_Globigerinita_glutinata	Microperforates	Globigerinita	glutinata	-	JQ799900_Microperforates_Globigerinita_glutinata_IV_NA_NA;FJ643288_Microperforates_Globigerinita_glutinata_I_NA_NA;KM193539_Microperforates_Globigerinita_glutinata_NA_NA_NA;KM193303_Microperforates_Globigerinita_glutinata_NA_NA_NA;FJ643296_Microperforates_Globigerinita_glutinata_III_NA_NA;FJ643277_Microperforates_Globigerinita_glutinata_III_NA_NA;KM193199_Microperforates_Globigerinita_glutinata_N…	-	-	-	-	-
ISU495	2	4	Yes	R-647_2_4_1	0	0	0	0	0	0	0	0	0	0	0	0	0	0	0	0	0	0	0	2	0	2	0	0	0	0	0	0	0	0	0	1	Microperforates_Candeina_nitida_NA_NA_NA	Microperforates	Candeina	nitida	NA	NAAB263435_Microperforates_Candeina_nitida_NA_NA_NA;	Spinose	Globigerina	bulloides	I	Spinose_Globigerina_bulloides_I
ISU496	1	6	NO	-	0	0	0	0	0	0	0	0	0	0	0	0	0	0	0	0	0	0	0	0	0	0	0	0	0	0	0	0	6	0	0	1	Non-Spinose_Neogloboquadrina_pachyderma_IV_NA_NA	Non-Spinose	Neogloboquadrina	pachyderma	IV	NAKM193680_Non-Spinose_Neogloboquadrina_pachyderma_IV_NA_NA;	-	-	-	-	-
ISU497	4	21	Yes	R-324_4_21_3	0	0	0	0	2	6	0	0	0	0	0	0	0	0	0	0	0	0	0	4	0	9	0	0	0	0	0	0	0	0	0	3	Microperforates_Globigerinita_glutinata	Microperforates	Globigerinita	glutinata	-	KM193151_Microperforates_Globigerinita_glutinata_NA_NA_NA;KM193497_Microperforates_Globigerinita_glutinata_NA_NA_NA;FJ643294_Microperforates_Globigerinita_glutinata_I_NA_NA;	Microperforates	Globigerinita	glutinata	I	Microperforates_Globigerinita_glutinata_I
ISU498	6	223	Yes	R-67_6_223_1	0	0	0	2	9	68	0	0	0	0	0	0	0	0	0	0	0	0	34	51	0	59	0	0	0	0	0	0	0	0	0	1	Microperforates_Globigerinita_glutinata_III_NA_NA	Microperforates	Globigerinita	glutinata	III	NAFJ643283_Microperforates_Globigerinita_glutinata_III_NA_NA;	Microperforates	Globigerinita	glutinata	III	Microperforates_Globigerinita_glutinata_III
ISU499	1	2	NO	-	0	0	0	0	0	0	0	0	0	0	0	0	0	0	0	0	0	0	0	2	0	0	0	0	0	0	0	0	0	0	0	5	Microperforates_Globigerinita_glutinata	Microperforates	Globigerinita	glutinata	-	FJ643286_Microperforates_Globigerinita_glutinata_I_NA_NA;KM193484_Microperforates_Globigerinita_glutinata_NA_NA_NA	-	-	-	-	-
ISU5	2	6	Yes	R-582_2_6_1	0	0	0	0	2	0	0	0	0	0	0	0	0	0	0	0	0	0	0	4	0	0	0	0	0	0	0	0	0	0	0	1	Microperforates_Candeina_nitida_NA_NA_NA	Microperforates	Candeina	nitida	NA	NAAB263435_Microperforates_Candeina_nitida_NA_NA_NA;	Microperforates	Candeina	nitida	I	Microperforates_Candeina_nitida_I
ISU50	3	86	Yes	R-132_3_86_2	0	0	0	0	0	0	0	0	0	0	0	0	5	0	19	0	0	0	0	0	0	0	0	0	0	0	0	0	62	0	0	2	Non-Spinose_Neogloboquadrina_pachyderma	Non-Spinose	Neogloboquadrina	pachyderma	-	KM193471_Non-Spinose_Neogloboquadrina_pachyderma_NA_NA_NA;KM193535_Non-Spinose_Neogloboquadrina_pachyderma_IV_NA_NA;KM193584_Non-Spinose_Neogloboquadrina_pachyderma_IV_NA_NA;	Non-Spinose	Neogloboquadrina	pachyderma	IV	Non-Spinose_Neogloboquadrina_pachyderma_IV
ISU500	1	2	NO	-	0	0	0	0	0	0	0	0	0	0	0	0	0	0	0	0	0	0	2	0	0	0	0	0	0	0	0	0	0	0	0	4	Microperforates_Globigerinita_glutinata	Microperforates	Globigerinita	glutinata	-	JQ799900_Microperforates_Globigerinita_glutinata_IV_NA_NA;FJ643288_Microperforates_Globigerinita_glutinata_I_NA_NA;KM193539_Microperforates_Globigerinita_glutinata_NA_NA_NA;KM193303_Microperforates_Globigerinita_glutinata_NA_NA_NA;FJ643296_Microperforates_Globigerinita_glutinata_III_NA_NA;FJ643277_Microperforates_Globigerinita_glutinata_III_NA_NA;KM193199_Microperforates_Globigerinita_glutinata_N…	-	-	-	-	-
ISU501	4	20	Yes	R-330_4_20_1	0	0	0	0	0	5	0	0	0	0	0	0	0	0	0	0	0	0	6	4	0	5	0	0	0	0	0	0	0	0	0	1	Microperforates_Globigerinita_glutinata	Microperforates	Globigerinita	glutinata	-	JQ799900_Microperforates_Globigerinita_glutinata_IV_NA_NA;FJ643296_Microperforates_Globigerinita_glutinata_III_NA_NA;KM193199_Microperforates_Globigerinita_glutinata_NA_NA_NA;AY453136_Microperforates_Globigerinita_glutinata_III_NA_NA	Microperforates	Globigerinita	glutinata	III	Microperforates_Globigerinita_glutinata_III
ISU502	2	396	Yes	R-44_2_396_0	0	0	0	0	0	137	0	0	0	0	0	0	0	0	0	0	0	0	0	0	0	259	0	0	0	0	0	0	0	0	0	0	Microperforates_Globigerinita_glutinata_NA_NA_NA	Microperforates	Globigerinita	glutinata	NA	NAKM193539_Microperforates_Globigerinita_glutinata_NA_NA_NA;	Microperforates	Globigerinita	glutinata	I	Microperforates_Globigerinita_glutinata_I
ISU503	5	47	Yes	R-198_5_47_1	0	0	0	0	4	19	0	0	0	0	0	0	0	0	0	0	0	0	4	12	0	8	0	0	0	0	0	0	0	0	0	1	Microperforates_Globigerinita_glutinata_III_NA_NA	Microperforates	Globigerinita	glutinata	III	NAFJ643283_Microperforates_Globigerinita_glutinata_III_NA_NA;	Microperforates	Globigerinita	glutinata	III	Microperforates_Globigerinita_glutinata_III
ISU504	3	11	Yes	R-439_3_11_1	0	0	0	0	0	4	0	0	0	0	0	0	0	0	0	0	0	0	0	3	0	4	0	0	0	0	0	0	0	0	0	1	Microperforates_Candeina_nitida_NA_NA_NA	Microperforates	Candeina	nitida	NA	NAAB263435_Microperforates_Candeina_nitida_NA_NA_NA;	Microperforates	Candeina	nitida	I	Microperforates_Candeina_nitida_I
ISU505	6	84	Yes	R-135_6_84_1	0	0	0	2	7	15	0	0	0	0	0	0	0	0	0	0	0	0	18	22	0	20	0	0	0	0	0	0	0	0	0	1	Microperforates_Globigerinita_glutinata_III_NA_NA	Microperforates	Globigerinita	glutinata	III	NAFJ643283_Microperforates_Globigerinita_glutinata_III_NA_NA;	Microperforates	Globigerinita	glutinata	III	Microperforates_Globigerinita_glutinata_III
ISU506	1	2	NO	-	2	0	0	0	0	0	0	0	0	0	0	0	0	0	0	0	0	0	0	0	0	0	0	0	0	0	0	0	0	0	0	1	Microperforates_Globigerinita_uvula	Microperforates	Globigerinita	uvula	-	KM193181_Microperforates_Globigerinita_uvula_NA_NA_NA;KM193691_Microperforates_Globigerinita_uvula_NA_NA_NA;KM193364_Microperforates_Globigerinita_uvula_NA_NA_NA;AF387173_Microperforates_Globigerinita_uvula_II_NA_NA;KM194324_Microperforates_Globigerinita_uvula_NA_NA_NA;	-	-	-	-	-
ISU507	2	4	Yes	R-654_2_4_1	0	0	0	0	2	2	0	0	0	0	0	0	0	0	0	0	0	0	0	0	0	0	0	0	0	0	0	0	0	0	0	1	Microperforates_Globigerinita_glutinata	Microperforates	Globigerinita	glutinata	-	FJ643296_Microperforates_Globigerinita_glutinata_III_NA_NA;KM193199_Microperforates_Globigerinita_glutinata_NA_NA_NA;FJ643277_Microperforates_Globigerinita_glutinata_III_NA_NA;AY453136_Microperforates_Globigerinita_glutinata_III_NA_NA;JQ799900_Microperforates_Globigerinita_glutinata_IV_NA_NA;	Microperforates	Globigerinita	uvula	I	Microperforates_Globigerinita_uvula_I
ISU508	1	3	NO	-	0	0	0	0	0	0	0	0	0	0	0	0	0	0	0	0	0	0	3	0	0	0	0	0	0	0	0	0	0	0	0	5	Microperforates_Globigerinita_uvula	Microperforates	Globigerinita	uvula	-	FJ643298_Microperforates_Globigerinita_uvula_I_NA_NA;KM193070_Microperforates_Globigerinita_uvula_NA_NA_NA;KM193079_Microperforates_Globigerinita_uvula_NA_NA_NA;	-	-	-	-	-
ISU509	5	145	Yes	R-97_5_145_1	0	0	0	0	12	70	0	0	0	0	0	0	0	0	0	0	0	0	15	29	0	19	0	0	0	0	0	0	0	0	0	1	Microperforates_Globigerinita_glutinata_III_NA_NA	Microperforates	Globigerinita	glutinata	III	NAFJ643283_Microperforates_Globigerinita_glutinata_III_NA_NA;	Microperforates	Globigerinita	glutinata	III	Microperforates_Globigerinita_glutinata_III
ISU51	1	3	NO	-	0	0	0	0	0	0	0	0	0	0	0	0	0	0	0	0	0	0	0	3	0	0	0	0	0	0	0	0	0	0	0	5	Microperforates_Globigerinita_glutinata	Microperforates	Globigerinita	glutinata	-	FJ643294_Microperforates_Globigerinita_glutinata_I_NA_NA;KM193484_Microperforates_Globigerinita_glutinata_NA_NA_NA;KM193497_Microperforates_Globigerinita_glutinata_NA_NA_NA;FJ643286_Microperforates_Globigerinita_glutinata_I_NA_NA;FJ643283_Microperforates_Globigerinita_glutinata_III_NA_NA;KM193151_Microperforates_Globigerinita_glutinata_NA_NA_NA	-	-	-	-	-
ISU510	5	157	Yes	R-89_5_157_1	0	0	0	0	10	91	0	0	0	0	0	0	0	0	0	0	0	0	13	17	0	26	0	0	0	0	0	0	0	0	0	1	Microperforates_Globigerinita_glutinata_III_NA_NA	Microperforates	Globigerinita	glutinata	III	NAFJ643283_Microperforates_Globigerinita_glutinata_III_NA_NA;	Microperforates	Globigerinita	glutinata	III	Microperforates_Globigerinita_glutinata_III
ISU511	3	6	Yes	R-569_3_6_4	0	0	0	0	0	2	0	0	0	0	0	0	0	0	0	0	0	0	2	2	0	0	0	0	0	0	0	0	0	0	0	4	Microperforates_Globigerinita_uvula	Microperforates	Globigerinita	uvula	-	FJ643298_Microperforates_Globigerinita_uvula_I_NA_NA;KM193079_Microperforates_Globigerinita_uvula_NA_NA_NA;KM193070_Microperforates_Globigerinita_uvula_NA_NA_NA;	Microperforates	Globigerinita	uvula	I	Microperforates_Globigerinita_uvula_I
ISU512	2	6	Yes	R-570_2_6_6	0	0	0	0	3	3	0	0	0	0	0	0	0	0	0	0	0	0	0	0	0	0	0	0	0	0	0	0	0	0	0	6	Microperforates_Globigerinita_uvula	Microperforates	Globigerinita	uvula	-	FJ643298_Microperforates_Globigerinita_uvula_I_NA_NA;KM193160_Microperforates_Globigerinita_uvula_NA_NA_NA;KM193079_Microperforates_Globigerinita_uvula_NA_NA_NA;KM193075_Microperforates_Globigerinita_uvula_NA_NA_NA;KM193070_Microperforates_Globigerinita_uvula_NA_NA_NA;	Microperforates	Globigerinita	uvula	I	Microperforates_Globigerinita_uvula_I
ISU513	1	6	NO	-	0	0	0	0	0	0	0	0	0	0	0	0	0	0	0	0	0	0	0	0	0	0	0	0	0	6	0	0	0	0	0	2	Non-Spinose_Neogloboquadrina_pachyderma_I_NA_NA	Non-Spinose	Neogloboquadrina	pachyderma	I	NAAY305329_Non-Spinose_Neogloboquadrina_pachyderma_I_NA_NA;	-	-	-	-	-
ISU514	5	40	Yes	R-225_5_40_1	0	0	0	0	3	9	0	0	0	0	0	0	0	0	0	0	0	0	6	10	0	12	0	0	0	0	0	0	0	0	0	1	Microperforates_Globigerinita_glutinata	Microperforates	Globigerinita	glutinata	-	FJ643296_Microperforates_Globigerinita_glutinata_III_NA_NA;KM193199_Microperforates_Globigerinita_glutinata_NA_NA_NA;FJ643277_Microperforates_Globigerinita_glutinata_III_NA_NA;AY453136_Microperforates_Globigerinita_glutinata_III_NA_NA;JQ799900_Microperforates_Globigerinita_glutinata_IV_NA_NA;	Microperforates	Globigerinita	glutinata	III	Microperforates_Globigerinita_glutinata_III
ISU515	1	4	NO	-	0	0	0	0	0	0	0	0	0	0	0	0	0	0	0	0	0	0	0	4	0	0	0	0	0	0	0	0	0	0	0	5	Microperforates_Globigerinita_glutinata	Microperforates	Globigerinita	glutinata	-	JQ799900_Microperforates_Globigerinita_glutinata_IV_NA_NA;FJ643288_Microperforates_Globigerinita_glutinata_I_NA_NA;KM193539_Microperforates_Globigerinita_glutinata_NA_NA_NA;FJ643296_Microperforates_Globigerinita_glutinata_III_NA_NA;FJ643277_Microperforates_Globigerinita_glutinata_III_NA_NA;KM193303_Microperforates_Globigerinita_glutinata_NA_NA_NA;KM193199_Microperforates_Globigerinita_glutinata_N…	-	-	-	-	-
ISU516	1	686	Yes	R-33_1_686_8	0	0	686	0	0	0	0	0	0	0	0	0	0	0	0	0	0	0	0	0	0	0	0	0	0	0	0	0	0	0	0	8	Non-Spiral_Galietelia_vivans_NA_NA_NA	Non-Spiral	Galietelia	vivans	NA	NAAB364519_Non-Spiral_Galietelia_vivans_NA_NA_NA;AB364517_Non-Spiral_Galietelia_vivans_NA_NA_NA;AB364518_Non-Spiral_Galietelia_vivans_NA_NA_NA;	Non-Spiral	Gallitellia	vivans	U1	Non-Spiral_Gallitellia_vivans_U1
ISU517	2	6	Yes	R-566_2_6_7	0	0	0	0	2	0	0	0	0	0	0	0	0	0	0	0	0	0	4	0	0	0	0	0	0	0	0	0	0	0	0	7	Microperforates_Globigerinita_uvula	Microperforates	Globigerinita	uvula	-	FJ643298_Microperforates_Globigerinita_uvula_I_NA_NA;KM193160_Microperforates_Globigerinita_uvula_NA_NA_NA;KM193079_Microperforates_Globigerinita_uvula_NA_NA_NA;KM193075_Microperforates_Globigerinita_uvula_NA_NA_NA;KM193070_Microperforates_Globigerinita_uvula_NA_NA_NA;	Microperforates	Globigerinita	uvula	I	Microperforates_Globigerinita_uvula_I
ISU518	3	29	Yes	R-263_3_29_1	0	0	0	0	0	0	0	0	0	5	16	8	0	0	0	0	0	0	0	0	0	0	0	0	0	0	0	0	0	0	0	1	Non-Spinose_Neogloboquadrina_pachyderma_I_NA_NA	Non-Spinose	Neogloboquadrina	pachyderma	I	NAAY305329_Non-Spinose_Neogloboquadrina_pachyderma_I_NA_NA;	Non-Spinose	Neogloboquadrina	pachyderma	I	Non-Spinose_Neogloboquadrina_pachyderma_I
ISU519	1	6	NO	-	0	0	0	0	0	0	0	0	0	0	0	0	6	0	0	0	0	0	0	0	0	0	0	0	0	0	0	0	0	0	0	8	Non-Spinose_Globoquadrina_conglomerata_NA_NA_NA	Non-Spinose	Globoquadrina	conglomerata	NA	NAKM193124_Non-Spinose_Globoquadrina_conglomerata_NA_NA_NA;KM193106_Non-Spinose_Globoquadrina_conglomerata_NA_NA_NA;KM193115_Non-Spinose_Globoquadrina_conglomerata_NA_NA_NA;KM193112_Non-Spinose_Globoquadrina_conglomerata_NA_NA_NA;KM193104_Non-Spinose_Globoquadrina_conglomerata_NA_NA_NA;KM193119_Non-Spinose_Globoquadrina_conglomerata_NA_NA_NA;KM193114_Non-Spinose_Globoquadrina_conglomerata_NA_NA_N…	-	-	-	-	-
ISU52	1	2	NO	-	0	0	0	0	0	2	0	0	0	0	0	0	0	0	0	0	0	0	0	0	0	0	0	0	0	0	0	0	0	0	0	3	Microperforates_Globigerinita_uvula	Microperforates	Globigerinita	uvula	-	FJ643298_Microperforates_Globigerinita_uvula_I_NA_NA;KM193079_Microperforates_Globigerinita_uvula_NA_NA_NA;KM193070_Microperforates_Globigerinita_uvula_NA_NA_NA;	-	-	-	-	-
ISU520	3	7	Yes	R-526_3_7_1	0	0	0	0	0	0	0	0	0	2	3	2	0	0	0	0	0	0	0	0	0	0	0	0	0	0	0	0	0	0	0	1	Non-Spinose_Neogloboquadrina_pachyderma_I_NA_NA	Non-Spinose	Neogloboquadrina	pachyderma	I	NAAY305329_Non-Spinose_Neogloboquadrina_pachyderma_I_NA_NA;	Non-Spinose	Neogloboquadrina	pachyderma	I	Non-Spinose_Neogloboquadrina_pachyderma_I
ISU521	2	6	Yes	R-565_2_6_1	0	0	0	0	0	2	0	0	0	0	0	0	0	0	0	0	0	0	0	0	0	4	0	0	0	0	0	0	0	0	0	1	Spinose_Globigerina_bulloides	Spinose	Globigerina	bulloides	-	Z83957_Spinose_Globigerina_bulloides_NA_NA_NA;GQ293072_Spinose_Globigerina_bulloides_I_c_NA;GQ293070_Spinose_Globigerina_bulloides_I_d_NA;GU060421_Spinose_Globigerina_bulloides_I_e_NA	Spinose	Globigerina	bulloides	I	Spinose_Globigerina_bulloides_I
ISU522	1	4	NO	-	0	0	0	0	0	0	0	0	0	0	0	0	0	0	0	0	0	0	0	4	0	0	0	0	0	0	0	0	0	0	0	2	Microperforates_Candeina_nitida_NA_NA_NA	Microperforates	Candeina	nitida	NA	NAAB468837_Microperforates_Candeina_nitida_NA_NA_NA;AB468836_Microperforates_Candeina_nitida_NA_NA_NA;KJ633212_Microperforates_Candeina_nitida_NA_NA_NA;AB263435_Microperforates_Candeina_nitida_NA_NA_NA	-	-	-	-	-
ISU523	1	4	NO	-	0	0	0	0	0	0	0	0	0	0	0	0	0	0	0	0	0	0	0	0	0	0	0	0	0	0	0	0	4	0	0	1	Non-Spinose_Neogloboquadrina_pachyderma_IV_NA_NA	Non-Spinose	Neogloboquadrina	pachyderma	IV	NAKM193550_Non-Spinose_Neogloboquadrina_pachyderma_IV_NA_NA;KM193530_Non-Spinose_Neogloboquadrina_pachyderma_IV_NA_NA;KM193284_Non-Spinose_Neogloboquadrina_pachyderma_IV_NA_NA;KM193861_Non-Spinose_Neogloboquadrina_pachyderma_IV_NA_NA;KM193614_Non-Spinose_Neogloboquadrina_pachyderma_IV_NA_NA;KM193889_Non-Spinose_Neogloboquadrina_pachyderma_IV_NA_NA;KM193556_Non-Spinose_Neogloboquadrina_pachyderma_…	-	-	-	-	-
ISU524	1	2	NO	-	0	0	0	0	2	0	0	0	0	0	0	0	0	0	0	0	0	0	0	0	0	0	0	0	0	0	0	0	0	0	0	7	Microperforates_Globigerinita_uvula	Microperforates	Globigerinita	uvula	-	FJ643298_Microperforates_Globigerinita_uvula_I_NA_NA;KM193160_Microperforates_Globigerinita_uvula_NA_NA_NA;KM193079_Microperforates_Globigerinita_uvula_NA_NA_NA;KM193075_Microperforates_Globigerinita_uvula_NA_NA_NA;KM193070_Microperforates_Globigerinita_uvula_NA_NA_NA;	-	-	-	-	-
ISU525	2	6	Yes	R-599_2_6_6	0	0	0	0	0	3	0	0	0	0	0	0	0	0	0	0	0	0	0	3	0	0	0	0	0	0	0	0	0	0	0	6	Microperforates_Globigerinita_glutinata	Microperforates	Globigerinita	glutinata	-	FJ643286_Microperforates_Globigerinita_glutinata_I_NA_NA;KM193484_Microperforates_Globigerinita_glutinata_NA_NA_NA	Microperforates	Globigerinita	glutinata	III	Microperforates_Globigerinita_glutinata_III
ISU526	5	15	Yes	R-378_5_15_8	0	0	0	0	4	2	0	0	0	0	0	0	0	0	0	0	0	0	2	4	0	3	0	0	0	0	0	0	0	0	0	8	Microperforates_Globigerinita_uvula	Microperforates	Globigerinita	uvula	-	FJ643298_Microperforates_Globigerinita_uvula_I_NA_NA;KM193160_Microperforates_Globigerinita_uvula_NA_NA_NA;KM193079_Microperforates_Globigerinita_uvula_NA_NA_NA;KM193075_Microperforates_Globigerinita_uvula_NA_NA_NA;KM193070_Microperforates_Globigerinita_uvula_NA_NA_NA;	Microperforates	Globigerinita	uvula	I	Microperforates_Globigerinita_uvula_I
ISU527	2	10	Yes	R-465_2_10_1	0	0	0	0	0	5	0	0	0	0	0	0	0	0	0	0	0	0	0	5	0	0	0	0	0	0	0	0	0	0	0	1	Microperforates_Globigerinita_glutinata	Microperforates	Globigerinita	glutinata	-	JQ799900_Microperforates_Globigerinita_glutinata_IV_NA_NA;FJ643296_Microperforates_Globigerinita_glutinata_III_NA_NA;KM193199_Microperforates_Globigerinita_glutinata_NA_NA_NA;AY453136_Microperforates_Globigerinita_glutinata_III_NA_NA	Microperforates	Globigerinita	glutinata	III	Microperforates_Globigerinita_glutinata_III
ISU528	1	2	NO	-	0	0	0	0	0	0	0	0	0	0	0	0	0	0	0	0	0	0	0	2	0	0	0	0	0	0	0	0	0	0	0	1	Microperforates_Globigerinita_glutinata_III_NA_NA	Microperforates	Globigerinita	glutinata	III	NAFJ643296_Microperforates_Globigerinita_glutinata_III_NA_NA;	-	-	-	-	-
ISU529	1	4	NO	-	0	0	0	0	4	0	0	0	0	0	0	0	0	0	0	0	0	0	0	0	0	0	0	0	0	0	0	0	0	0	0	4	Microperforates_Globigerinita_glutinata	Microperforates	Globigerinita	glutinata	-	KM193497_Microperforates_Globigerinita_glutinata_NA_NA_NA;FJ643294_Microperforates_Globigerinita_glutinata_I_NA_NA;FJ643286_Microperforates_Globigerinita_glutinata_I_NA_NA;FJ643283_Microperforates_Globigerinita_glutinata_III_NA_NA;KM193484_Microperforates_Globigerinita_glutinata_NA_NA_NA;KM193151_Microperforates_Globigerinita_glutinata_NA_NA_NA	-	-	-	-	-
ISU53	1	2	NO	-	0	0	0	0	0	0	0	0	0	0	0	0	0	0	0	0	0	0	0	0	0	2	0	0	0	0	0	0	0	0	0	0	Microperforates_Globigerinita_glutinata	Microperforates	Globigerinita	glutinata	-	FJ643286_Microperforates_Globigerinita_glutinata_I_NA_NA;KM193484_Microperforates_Globigerinita_glutinata_NA_NA_NA	-	-	-	-	-
ISU530	1	2	NO	-	0	0	0	0	0	0	0	0	0	0	0	0	0	0	0	0	0	0	0	2	0	0	0	0	0	0	0	0	0	0	0	5	Microperforates_Globigerinita_uvula	Microperforates	Globigerinita	uvula	-	FJ643298_Microperforates_Globigerinita_uvula_I_NA_NA;KM193160_Microperforates_Globigerinita_uvula_NA_NA_NA;KM193075_Microperforates_Globigerinita_uvula_NA_NA_NA;KM193070_Microperforates_Globigerinita_uvula_NA_NA_NA;KM193079_Microperforates_Globigerinita_uvula_NA_NA_NA;	-	-	-	-	-
ISU531	4	15	Yes	R-386_4_15_2	0	0	0	0	0	6	0	0	0	0	0	0	0	0	0	0	0	0	3	3	0	3	0	0	0	0	0	0	0	0	0	2	Microperforates_Globigerinita_glutinata	Microperforates	Globigerinita	glutinata	-	FJ643294_Microperforates_Globigerinita_glutinata_I_NA_NA;KM193497_Microperforates_Globigerinita_glutinata_NA_NA_NA;FJ643283_Microperforates_Globigerinita_glutinata_III_NA_NA;KM193151_Microperforates_Globigerinita_glutinata_NA_NA_NA	Microperforates	Globigerinita	glutinata	III	Microperforates_Globigerinita_glutinata_III
ISU532	2	811	Yes	R-26_2_811_5	0	0	0	0	0	135	0	0	0	0	0	0	0	0	0	0	0	0	0	676	0	0	0	0	0	0	0	0	0	0	0	5	Microperforates_Globigerinita_uvula	Microperforates	Globigerinita	uvula	-	FJ643298_Microperforates_Globigerinita_uvula_I_NA_NA;KM193079_Microperforates_Globigerinita_uvula_NA_NA_NA;KM193070_Microperforates_Globigerinita_uvula_NA_NA_NA;	Microperforates	Globigerinita	uvula	I	Microperforates_Globigerinita_uvula_I
ISU533	1	2	NO	-	0	0	0	0	0	0	0	0	0	0	0	0	0	0	0	0	0	0	0	0	0	2	0	0	0	0	0	0	0	0	0	3	Microperforates_Globigerinita_glutinata	Microperforates	Globigerinita	glutinata	-	FJ643277_Microperforates_Globigerinita_glutinata_III_NA_NA;FJ643296_Microperforates_Globigerinita_glutinata_III_NA_NA;JQ799900_Microperforates_Globigerinita_glutinata_IV_NA_NA;KM193199_Microperforates_Globigerinita_glutinata_NA_NA_NA;AY453136_Microperforates_Globigerinita_glutinata_III_NA_NA;	-	-	-	-	-
ISU534	1	2	NO	-	0	0	0	0	0	0	0	0	0	0	0	0	0	0	0	0	0	0	2	0	0	0	0	0	0	0	0	0	0	0	0	1	Microperforates_Globigerinita_glutinata_III_NA_NA	Microperforates	Globigerinita	glutinata	III	NAFJ643296_Microperforates_Globigerinita_glutinata_III_NA_NA;	-	-	-	-	-
ISU535	1	2	NO	-	0	0	0	0	0	0	0	0	0	0	0	0	0	0	0	0	0	0	2	0	0	0	0	0	0	0	0	0	0	0	0	1	Microperforates_Globigerinita_glutinata_II_NA_NA	Microperforates	Globigerinita	glutinata	II	NAAB468826_Microperforates_Globigerinita_glutinata_II_NA_NA;	-	-	-	-	-
ISU536	1	2	NO	-	0	0	0	0	0	0	0	0	0	0	0	0	0	0	0	0	0	0	0	0	0	2	0	0	0	0	0	0	0	0	0	1	Microperforates_Candeina_nitida_NA_NA_NA	Microperforates	Candeina	nitida	NA	NAAB263435_Microperforates_Candeina_nitida_NA_NA_NA;	-	-	-	-	-
ISU537	1	4	NO	-	4	0	0	0	0	0	0	0	0	0	0	0	0	0	0	0	0	0	0	0	0	0	0	0	0	0	0	0	0	0	0	1	Microperforates_Globigerinita_uvula	Microperforates	Globigerinita	uvula	-	KM193181_Microperforates_Globigerinita_uvula_NA_NA_NA;KM193691_Microperforates_Globigerinita_uvula_NA_NA_NA;KM193364_Microperforates_Globigerinita_uvula_NA_NA_NA;AF387173_Microperforates_Globigerinita_uvula_II_NA_NA;KM194324_Microperforates_Globigerinita_uvula_NA_NA_NA;	-	-	-	-	-
ISU538	1	32	Yes	R-251_1_32_1	0	0	0	0	0	0	0	0	0	0	0	0	0	0	0	0	0	0	0	0	0	0	0	0	0	0	0	0	32	0	0	1	Non-Spinose_Neogloboquadrina_pachyderma_IV_NA_NA	Non-Spinose	Neogloboquadrina	pachyderma	IV	NAKM193680_Non-Spinose_Neogloboquadrina_pachyderma_IV_NA_NA;	Non-Spinose	Neogloboquadrina	pachyderma	IV	Non-Spinose_Neogloboquadrina_pachyderma_IV
ISU539	4	11	Yes	R-442_4_11_1	0	0	0	0	3	4	0	0	0	0	0	0	0	0	0	0	0	0	2	2	0	0	0	0	0	0	0	0	0	0	0	1	Microperforates_Globigerinita_glutinata	Microperforates	Globigerinita	glutinata	-	FJ643296_Microperforates_Globigerinita_glutinata_III_NA_NA;KM193199_Microperforates_Globigerinita_glutinata_NA_NA_NA;FJ643277_Microperforates_Globigerinita_glutinata_III_NA_NA;AY453136_Microperforates_Globigerinita_glutinata_III_NA_NA;JQ799900_Microperforates_Globigerinita_glutinata_IV_NA_NA;	Microperforates	Globigerinita	glutinata	III	Microperforates_Globigerinita_glutinata_III
ISU54	1	2	NO	-	0	0	0	0	0	0	0	0	0	0	0	0	0	0	0	0	0	0	0	0	0	2	0	0	0	0	0	0	0	0	0	4	Microperforates_Globigerinita_glutinata	Microperforates	Globigerinita	glutinata	-	FJ643277_Microperforates_Globigerinita_glutinata_III_NA_NA;FJ643296_Microperforates_Globigerinita_glutinata_III_NA_NA;JQ799900_Microperforates_Globigerinita_glutinata_IV_NA_NA;KM193539_Microperforates_Globigerinita_glutinata_NA_NA_NA;KM193303_Microperforates_Globigerinita_glutinata_NA_NA_NA;KM193199_Microperforates_Globigerinita_glutinata_NA_NA_NA;AY453136_Microperforates_Globigerinita_glutinata_…	-	-	-	-	-
ISU540	1	2	NO	-	0	0	0	0	0	2	0	0	0	0	0	0	0	0	0	0	0	0	0	0	0	0	0	0	0	0	0	0	0	0	0	2	Microperforates_Globigerinita_glutinata_III_NA_NA	Microperforates	Globigerinita	glutinata	III	NAFJ643283_Microperforates_Globigerinita_glutinata_III_NA_NA;	-	-	-	-	-
ISU541	1	2	NO	-	0	0	0	0	0	2	0	0	0	0	0	0	0	0	0	0	0	0	0	0	0	0	0	0	0	0	0	0	0	0	0	1	Monolamellar_Hastigerina_pelagica	Monolamellar	Hastigerina	pelagica	-	FJ643408_Monolamellar_Hastigerina_pelagica_II_a_NA;KM194103_Monolamellar_Hastigerina_pelagica_NA_NA_NA;FJ643367_Monolamellar_Hastigerina_pelagica_II_a_NA;FJ643402_Monolamellar_Hastigerina_pelagica_NA_NA_NA	-	-	-	-	-
ISU542	1	2	NO	-	0	0	0	0	0	0	0	0	0	0	0	2	0	0	0	0	0	0	0	0	0	0	0	0	0	0	0	0	0	0	0	2	Non-Spinose_Neogloboquadrina_pachyderma_I_NA_NA	Non-Spinose	Neogloboquadrina	pachyderma	I	NAAY305329_Non-Spinose_Neogloboquadrina_pachyderma_I_NA_NA;	-	-	-	-	-
ISU543	5	356	Yes	R-48_5_356_1	0	0	0	0	13	180	0	0	0	0	0	0	0	0	0	0	0	0	38	48	0	77	0	0	0	0	0	0	0	0	0	1	Microperforates_Globigerinita_glutinata	Microperforates	Globigerinita	glutinata	-	FJ643296_Microperforates_Globigerinita_glutinata_III_NA_NA;KM193199_Microperforates_Globigerinita_glutinata_NA_NA_NA;FJ643277_Microperforates_Globigerinita_glutinata_III_NA_NA;AY453136_Microperforates_Globigerinita_glutinata_III_NA_NA;JQ799900_Microperforates_Globigerinita_glutinata_IV_NA_NA;	Microperforates	Globigerinita	glutinata	III	Microperforates_Globigerinita_glutinata_III
ISU544	7	5023	Yes	R-13_7_5023_0	0	0	0	60	447	510	0	0	65	0	0	0	0	0	0	0	0	0	808	2281	0	852	0	0	0	0	0	0	0	0	0	0	Microperforates_Globigerinita_glutinata	Microperforates	Globigerinita	glutinata	-	FJ643418_Microperforates_Globigerinita_glutinata_NA_NA_NA;AB468829_Microperforates_Globigerinita_glutinata_II_NA_NA;AB468827_Microperforates_Globigerinita_glutinata_II_NA_NA;	Microperforates	Globigerinita	glutinata	II	Microperforates_Globigerinita_glutinata_II
ISU545	1	2	NO	-	0	0	0	0	0	0	0	0	0	0	0	0	0	0	0	0	0	0	0	2	0	0	0	0	0	0	0	0	0	0	0	6	Microperforates_Globigerinita_glutinata	Microperforates	Globigerinita	glutinata	-	FJ643286_Microperforates_Globigerinita_glutinata_I_NA_NA;KM193484_Microperforates_Globigerinita_glutinata_NA_NA_NA	-	-	-	-	-
ISU546	1	2	NO	-	0	0	0	0	0	0	0	0	0	0	0	0	0	0	0	0	0	0	0	0	0	2	0	0	0	0	0	0	0	0	0	1	Microperforates_Globigerinita_glutinata	Microperforates	Globigerinita	glutinata	-	AB468829_Microperforates_Globigerinita_glutinata_II_NA_NA;AB468827_Microperforates_Globigerinita_glutinata_II_NA_NA;FJ643418_Microperforates_Globigerinita_glutinata_NA_NA_NA;	-	-	-	-	-
ISU547	1	4	NO	-	0	0	0	0	0	0	0	0	0	0	0	0	0	0	0	0	0	0	0	0	0	4	0	0	0	0	0	0	0	0	0	1	Spinose_Globigerina_bulloides	Spinose	Globigerina	bulloides	-	GQ293072_Spinose_Globigerina_bulloides_I_c_NA;GU060421_Spinose_Globigerina_bulloides_I_e_NA;GQ293070_Spinose_Globigerina_bulloides_I_d_NA;Z83957_Spinose_Globigerina_bulloides_NA_NA_NA	-	-	-	-	-
ISU548	1	2	NO	-	0	0	0	0	0	0	0	0	0	0	0	0	0	0	0	0	0	0	0	0	0	0	0	0	0	0	0	0	0	0	2	1	Microperforates_Globigerinita_uvula	Microperforates	Globigerinita	uvula	-	KM193181_Microperforates_Globigerinita_uvula_NA_NA_NA;KM193364_Microperforates_Globigerinita_uvula_NA_NA_NA;AF387173_Microperforates_Globigerinita_uvula_II_NA_NA;KM194324_Microperforates_Globigerinita_uvula_NA_NA_NA;KM193691_Microperforates_Globigerinita_uvula_NA_NA_NA;	-	-	-	-	-
ISU549	1	2	NO	-	0	0	0	0	0	0	0	0	0	0	0	2	0	0	0	0	0	0	0	0	0	0	0	0	0	0	0	0	0	0	0	2	Non-Spinose_Neogloboquadrina_pachyderma_I_NA_NA	Non-Spinose	Neogloboquadrina	pachyderma	I	NAAY305329_Non-Spinose_Neogloboquadrina_pachyderma_I_NA_NA;	-	-	-	-	-
ISU55	1	2	NO	-	0	0	0	0	0	0	0	0	0	0	0	0	0	0	0	0	0	0	0	2	0	0	0	0	0	0	0	0	0	0	0	1	Spinose_Globigerina_bulloides	Spinose	Globigerina	bulloides	-	Z83957_Spinose_Globigerina_bulloides_NA_NA_NA;GQ293072_Spinose_Globigerina_bulloides_I_c_NA;GQ293070_Spinose_Globigerina_bulloides_I_d_NA;GU060421_Spinose_Globigerina_bulloides_I_e_NA	-	-	-	-	-
ISU550	2	8	Yes	R-495_2_8_5	0	0	0	0	0	5	0	0	0	0	0	0	0	0	0	0	0	0	3	0	0	0	0	0	0	0	0	0	0	0	0	5	Microperforates_Globigerinita_uvula	Microperforates	Globigerinita	uvula	-	FJ643298_Microperforates_Globigerinita_uvula_I_NA_NA;KM193079_Microperforates_Globigerinita_uvula_NA_NA_NA;KM193070_Microperforates_Globigerinita_uvula_NA_NA_NA;	Microperforates	Globigerinita	uvula	I	Microperforates_Globigerinita_uvula_I
ISU551	4	17	Yes	R-357_4_17_2	0	0	0	0	0	2	0	0	0	0	0	0	0	0	0	0	0	0	2	5	0	8	0	0	0	0	0	0	0	0	0	2	Microperforates_Globigerinita_glutinata	Microperforates	Globigerinita	glutinata	-	JQ799900_Microperforates_Globigerinita_glutinata_IV_NA_NA;FJ643296_Microperforates_Globigerinita_glutinata_III_NA_NA;KM193199_Microperforates_Globigerinita_glutinata_NA_NA_NA;AY453136_Microperforates_Globigerinita_glutinata_III_NA_NA	Microperforates	Globigerinita	glutinata	III	Microperforates_Globigerinita_glutinata_III
ISU552	1	2	NO	-	0	0	0	0	0	0	0	0	0	0	0	0	0	0	0	0	0	0	2	0	0	0	0	0	0	0	0	0	0	0	0	5	Microperforates_Globigerinita_uvula	Microperforates	Globigerinita	uvula	-	FJ643298_Microperforates_Globigerinita_uvula_I_NA_NA;KM193070_Microperforates_Globigerinita_uvula_NA_NA_NA;KM193079_Microperforates_Globigerinita_uvula_NA_NA_NA;	-	-	-	-	-
ISU553	1	244	Yes	R-62_1_244_5	0	0	0	0	0	0	0	0	0	0	0	0	0	0	0	0	0	0	0	0	0	0	0	0	0	0	0	0	0	244	0	5	Microperforates_Globigerinita_uvula	Microperforates	Globigerinita	uvula	-	FJ643298_Microperforates_Globigerinita_uvula_I_NA_NA;KM193070_Microperforates_Globigerinita_uvula_NA_NA_NA;KM193278_Microperforates_Globigerinita_uvula_NA_NA_NA;KM193079_Microperforates_Globigerinita_uvula_NA_NA_NA;KM193160_Microperforates_Globigerinita_uvula_NA_NA_NA;KM193075_Microperforates_Globigerinita_uvula_NA_NA_NA;KM194434_Rotaliida_Rotaliida_sp.2_NA_NA_NA;	Microperforates	Globigerinita	uvula	II	Microperforates_Globigerinita_uvula_II
ISU554	2	4	Yes	R-671_2_4_1	0	0	0	0	0	0	0	0	0	2	0	2	0	0	0	0	0	0	0	0	0	0	0	0	0	0	0	0	0	0	0	1	Non-Spinose_Neogloboquadrina_pachyderma_I_NA_NA	Non-Spinose	Neogloboquadrina	pachyderma	I	NAAY305329_Non-Spinose_Neogloboquadrina_pachyderma_I_NA_NA;	Non-Spinose	Neogloboquadrina	pachyderma	I	Non-Spinose_Neogloboquadrina_pachyderma_I
ISU555	2	9	Yes	R-473_2_9_1	0	0	0	0	0	0	0	0	0	0	0	0	0	0	0	0	0	0	0	3	0	6	0	0	0	0	0	0	0	0	0	1	Spinose_Globigerina_bulloides	Spinose	Globigerina	bulloides	-	Z83957_Spinose_Globigerina_bulloides_NA_NA_NA;GQ293072_Spinose_Globigerina_bulloides_I_c_NA;GQ293070_Spinose_Globigerina_bulloides_I_d_NA;GU060421_Spinose_Globigerina_bulloides_I_e_NA	Spinose	Globigerina	bulloides	I	Spinose_Globigerina_bulloides_I
ISU556	1	3	NO	-	0	0	0	0	0	0	0	0	0	0	0	0	0	0	0	0	0	0	0	0	0	3	0	0	0	0	0	0	0	0	0	1	Microperforates_Globigerinita_glutinata	Microperforates	Globigerinita	glutinata	-	KM193199_Microperforates_Globigerinita_glutinata_NA_NA_NA;AY453136_Microperforates_Globigerinita_glutinata_III_NA_NA;JQ799900_Microperforates_Globigerinita_glutinata_IV_NA_NA;	-	-	-	-	-
ISU557	2	5	Yes	R-612_2_5_5	0	0	0	0	0	3	0	0	0	0	0	0	0	0	0	0	0	0	0	2	0	0	0	0	0	0	0	0	0	0	0	5	Microperforates_Candeina_nitida_NA_NA_NA	Microperforates	Candeina	nitida	NA	NAAB468837_Microperforates_Candeina_nitida_NA_NA_NA;KJ633212_Microperforates_Candeina_nitida_NA_NA_NA;AB468836_Microperforates_Candeina_nitida_NA_NA_NA;AB263435_Microperforates_Candeina_nitida_NA_NA_NA	Microperforates	Globigerinita	glutinata	III	Microperforates_Globigerinita_glutinata_III
ISU558	5	30	Yes	R-259_5_30_1	0	0	0	0	4	8	0	0	0	0	0	0	0	0	0	0	0	0	5	5	0	8	0	0	0	0	0	0	0	0	0	1	Microperforates_Globigerinita_glutinata	Microperforates	Globigerinita	glutinata	-	FJ643296_Microperforates_Globigerinita_glutinata_III_NA_NA;KM193199_Microperforates_Globigerinita_glutinata_NA_NA_NA;FJ643277_Microperforates_Globigerinita_glutinata_III_NA_NA;AY453136_Microperforates_Globigerinita_glutinata_III_NA_NA;JQ799900_Microperforates_Globigerinita_glutinata_IV_NA_NA;	Microperforates	Globigerinita	glutinata	III	Microperforates_Globigerinita_glutinata_III
ISU559	4	91	Yes	R-128_4_91_1	0	0	0	78	0	0	0	0	0	0	0	0	0	0	0	0	0	0	3	3	0	7	0	0	0	0	0	0	0	0	0	1	Microperforates_Globigerinita_glutinata	Microperforates	Globigerinita	glutinata	-	KM193199_Microperforates_Globigerinita_glutinata_NA_NA_NA;JQ799900_Microperforates_Globigerinita_glutinata_IV_NA_NA;AY453136_Microperforates_Globigerinita_glutinata_III_NA_NA;	Microperforates	Globigerinita	glutinata	III	Microperforates_Globigerinita_glutinata_III
ISU56	1	2	NO	-	0	0	0	0	0	2	0	0	0	0	0	0	0	0	0	0	0	0	0	0	0	0	0	0	0	0	0	0	0	0	0	1	Microperforates_Globigerinita_glutinata_NA_NA_NA	Microperforates	Globigerinita	glutinata	NA	NAKM193539_Microperforates_Globigerinita_glutinata_NA_NA_NA;	-	-	-	-	-
ISU560	1	2	NO	-	0	0	0	0	0	0	0	0	0	0	0	0	0	0	0	0	0	0	0	0	0	2	0	0	0	0	0	0	0	0	0	3	Microperforates_Globigerinita_glutinata	Microperforates	Globigerinita	glutinata	-	KM193497_Microperforates_Globigerinita_glutinata_NA_NA_NA;FJ643294_Microperforates_Globigerinita_glutinata_I_NA_NA;KM193151_Microperforates_Globigerinita_glutinata_NA_NA_NA;	-	-	-	-	-
ISU561	1	2	NO	-	0	0	0	0	0	0	0	0	0	0	0	0	2	0	0	0	0	0	0	0	0	0	0	0	0	0	0	0	0	0	0	1	Spinose_Globigerina_bulloides_II_c_NA	Spinose	Globigerina	bulloides	II	cAF250111_Spinose_Globigerina_bulloides_II_c_NA;	-	-	-	-	-
ISU562	1	2	NO	-	0	0	0	0	0	2	0	0	0	0	0	0	0	0	0	0	0	0	0	0	0	0	0	0	0	0	0	0	0	0	0	5	Microperforates_Globigerinita_uvula	Microperforates	Globigerinita	uvula	-	FJ643298_Microperforates_Globigerinita_uvula_I_NA_NA;KM193079_Microperforates_Globigerinita_uvula_NA_NA_NA;KM193070_Microperforates_Globigerinita_uvula_NA_NA_NA;	-	-	-	-	-
ISU563	4	20	Yes	R-333_4_20_1	0	0	0	0	0	3	0	0	0	0	0	0	0	0	0	0	0	0	5	8	0	4	0	0	0	0	0	0	0	0	0	1	Microperforates_Globigerinita_glutinata	Microperforates	Globigerinita	glutinata	-	JQ799900_Microperforates_Globigerinita_glutinata_IV_NA_NA;FJ643296_Microperforates_Globigerinita_glutinata_III_NA_NA;KM193199_Microperforates_Globigerinita_glutinata_NA_NA_NA;AY453136_Microperforates_Globigerinita_glutinata_III_NA_NA	Microperforates	Globigerinita	glutinata	III	Microperforates_Globigerinita_glutinata_III
ISU564	4	44	Yes	R-208_4_44_1	0	0	0	0	0	15	0	0	0	0	0	0	0	0	0	0	0	0	8	12	0	9	0	0	0	0	0	0	0	0	0	1	Microperforates_Globigerinita_glutinata_III_NA_NA	Microperforates	Globigerinita	glutinata	III	NAFJ643283_Microperforates_Globigerinita_glutinata_III_NA_NA;	Microperforates	Globigerinita	glutinata	III	Microperforates_Globigerinita_glutinata_III
ISU565	1	2	NO	-	0	0	0	0	0	2	0	0	0	0	0	0	0	0	0	0	0	0	0	0	0	0	0	0	0	0	0	0	0	0	0	4	Microperforates_Globigerinita_glutinata	Microperforates	Globigerinita	glutinata	-	FJ643286_Microperforates_Globigerinita_glutinata_I_NA_NA;KM193484_Microperforates_Globigerinita_glutinata_NA_NA_NA	-	-	-	-	-
ISU566	2	229	Yes	R-65_2_229_2	0	0	0	54	0	175	0	0	0	0	0	0	0	0	0	0	0	0	0	0	0	0	0	0	0	0	0	0	0	0	0	2	Microperforates_Globigerinita_uvula	Microperforates	Globigerinita	uvula	-	FJ643298_Microperforates_Globigerinita_uvula_I_NA_NA;KM193070_Microperforates_Globigerinita_uvula_NA_NA_NA;KM193079_Microperforates_Globigerinita_uvula_NA_NA_NA;	Microperforates	Globigerinita	uvula	I	Microperforates_Globigerinita_uvula_I
ISU567	4	12	Yes	R-422_4_12_1	0	0	0	0	0	2	0	0	0	0	0	0	0	0	0	0	0	0	3	4	0	3	0	0	0	0	0	0	0	0	0	1	Microperforates_Globigerinita_glutinata	Microperforates	Globigerinita	glutinata	-	JQ799900_Microperforates_Globigerinita_glutinata_IV_NA_NA;FJ643296_Microperforates_Globigerinita_glutinata_III_NA_NA;KM193199_Microperforates_Globigerinita_glutinata_NA_NA_NA;AY453136_Microperforates_Globigerinita_glutinata_III_NA_NA	Microperforates	Globigerinita	glutinata	III	Microperforates_Globigerinita_glutinata_III
ISU568	2	10	Yes	R-457_2_10_1	8	2	0	0	0	0	0	0	0	0	0	0	0	0	0	0	0	0	0	0	0	0	0	0	0	0	0	0	0	0	0	1	Microperforates_Globigerinita_uvula	Microperforates	Globigerinita	uvula	-	KM193181_Microperforates_Globigerinita_uvula_NA_NA_NA;KM193691_Microperforates_Globigerinita_uvula_NA_NA_NA;KM193364_Microperforates_Globigerinita_uvula_NA_NA_NA;AF387173_Microperforates_Globigerinita_uvula_II_NA_NA;KM194324_Microperforates_Globigerinita_uvula_NA_NA_NA;	Microperforates	Globigerinita	uvula	II	Microperforates_Globigerinita_uvula_II
ISU569	4	29	Yes	R-267_4_29_1	0	0	0	0	0	8	0	0	0	0	0	0	0	0	0	0	0	0	7	10	0	4	0	0	0	0	0	0	0	0	0	1	Microperforates_Globigerinita_glutinata	Microperforates	Globigerinita	glutinata	-	JQ799900_Microperforates_Globigerinita_glutinata_IV_NA_NA;FJ643296_Microperforates_Globigerinita_glutinata_III_NA_NA;KM193199_Microperforates_Globigerinita_glutinata_NA_NA_NA;AY453136_Microperforates_Globigerinita_glutinata_III_NA_NA	Microperforates	Globigerinita	glutinata	III	Microperforates_Globigerinita_glutinata_III
ISU57	1	21	Yes	R-316_1_21_8	0	0	0	0	0	21	0	0	0	0	0	0	0	0	0	0	0	0	0	0	0	0	0	0	0	0	0	0	0	0	0	8	Non-Spiral_Galietelia_vivans_NA_NA_NA	Non-Spiral	Galietelia	vivans	NA	NAAB364519_Non-Spiral_Galietelia_vivans_NA_NA_NA;AB364517_Non-Spiral_Galietelia_vivans_NA_NA_NA;AB364518_Non-Spiral_Galietelia_vivans_NA_NA_NA;	Unidentified	Globigerinita	uvula	I	Unidentified_Globigerinita_uvula_I
ISU570	3	6	Yes	R-598_3_6_4	0	0	0	0	0	2	0	0	0	0	0	0	0	0	0	0	0	0	2	0	0	2	0	0	0	0	0	0	0	0	0	4	Microperforates_Globigerinita_glutinata	Microperforates	Globigerinita	glutinata	-	FJ643286_Microperforates_Globigerinita_glutinata_I_NA_NA;KM193484_Microperforates_Globigerinita_glutinata_NA_NA_NA	Microperforates	Globigerinita	glutinata	I	Microperforates_Globigerinita_glutinata_I
ISU571	1	2	NO	-	0	0	0	0	0	2	0	0	0	0	0	0	0	0	0	0	0	0	0	0	0	0	0	0	0	0	0	0	0	0	0	3	Microperforates_Globigerinita_glutinata	Microperforates	Globigerinita	glutinata	-	FJ643294_Microperforates_Globigerinita_glutinata_I_NA_NA;KM193497_Microperforates_Globigerinita_glutinata_NA_NA_NA;FJ643283_Microperforates_Globigerinita_glutinata_III_NA_NA;KM193151_Microperforates_Globigerinita_glutinata_NA_NA_NA	-	-	-	-	-
ISU572	1	2	NO	-	0	0	0	0	0	2	0	0	0	0	0	0	0	0	0	0	0	0	0	0	0	0	0	0	0	0	0	0	0	0	0	4	Microperforates_Globigerinita_glutinata	Microperforates	Globigerinita	glutinata	-	FJ643286_Microperforates_Globigerinita_glutinata_I_NA_NA;KM193484_Microperforates_Globigerinita_glutinata_NA_NA_NA	-	-	-	-	-
ISU573	1	2	NO	-	0	0	0	0	0	0	0	0	0	0	0	0	0	0	0	0	0	0	0	0	0	2	0	0	0	0	0	0	0	0	0	3	Microperforates_Globigerinita_glutinata	Microperforates	Globigerinita	glutinata	-	KM193497_Microperforates_Globigerinita_glutinata_NA_NA_NA;FJ643294_Microperforates_Globigerinita_glutinata_I_NA_NA;KM193151_Microperforates_Globigerinita_glutinata_NA_NA_NA;	-	-	-	-	-
ISU574	1	2	NO	-	0	0	0	0	0	0	0	0	0	0	0	0	0	0	0	0	2	0	0	0	0	0	0	0	0	0	0	0	0	0	0	1	Microperforates_Globigerinita_uvula	Microperforates	Globigerinita	uvula	-	KM193181_Microperforates_Globigerinita_uvula_NA_NA_NA;KM193364_Microperforates_Globigerinita_uvula_NA_NA_NA;AF387173_Microperforates_Globigerinita_uvula_II_NA_NA;KM194324_Microperforates_Globigerinita_uvula_NA_NA_NA;KM193691_Microperforates_Globigerinita_uvula_NA_NA_NA;	-	-	-	-	-
ISU575	1	2	NO	-	0	0	0	0	0	0	0	0	0	0	2	0	0	0	0	0	0	0	0	0	0	0	0	0	0	0	0	0	0	0	0	1	Non-Spinose_Neogloboquadrina_pachyderma_VII_NA_NA	Non-Spinose	Neogloboquadrina	pachyderma	VII	NAKM193488_Non-Spinose_Neogloboquadrina_pachyderma_VII_NA_NA;KM193200_Non-Spinose_Neogloboquadrina_pachyderma_VII_NA_NA;EF447103_Non-Spinose_Neogloboquadrina_pachyderma_VII_NA_NA;KM193201_Non-Spinose_Neogloboquadrina_pachyderma_VII_NA_NA;KM193348_Non-Spinose_Neogloboquadrina_pachyderma_VII_NA_NA;	-	-	-	-	-
ISU576	1	2	NO	-	0	0	0	0	0	0	0	0	0	0	0	0	0	0	0	0	0	0	0	0	0	2	0	0	0	0	0	0	0	0	0	3	Microperforates_Globigerinita_glutinata	Microperforates	Globigerinita	glutinata	-	KM193497_Microperforates_Globigerinita_glutinata_NA_NA_NA;FJ643294_Microperforates_Globigerinita_glutinata_I_NA_NA;KM193151_Microperforates_Globigerinita_glutinata_NA_NA_NA;	-	-	-	-	-
ISU577	1	3	NO	-	0	0	0	0	0	3	0	0	0	0	0	0	0	0	0	0	0	0	0	0	0	0	0	0	0	0	0	0	0	0	0	9	Non-Spiral_Galietelia_vivans_NA_NA_NA	Non-Spiral	Galietelia	vivans	NA	NAAB364519_Non-Spiral_Galietelia_vivans_NA_NA_NA;AB364517_Non-Spiral_Galietelia_vivans_NA_NA_NA;AB364518_Non-Spiral_Galietelia_vivans_NA_NA_NA;	-	-	-	-	-
ISU578	4	14	Yes	R-400_4_14_1	0	0	0	0	0	3	0	0	0	0	0	0	0	0	0	0	0	0	2	4	0	5	0	0	0	0	0	0	0	0	0	1	Microperforates_Globigerinita_glutinata	Microperforates	Globigerinita	glutinata	-	JQ799900_Microperforates_Globigerinita_glutinata_IV_NA_NA;FJ643296_Microperforates_Globigerinita_glutinata_III_NA_NA;KM193199_Microperforates_Globigerinita_glutinata_NA_NA_NA;AY453136_Microperforates_Globigerinita_glutinata_III_NA_NA	Microperforates	Globigerinita	glutinata	III	Microperforates_Globigerinita_glutinata_III
ISU579	2	4	Yes	R-690_2_4_1	0	0	0	0	0	2	0	0	0	0	0	0	0	0	0	0	0	0	0	0	0	2	0	0	0	0	0	0	0	0	0	1	Microperforates_Globigerinita_glutinata	Microperforates	Globigerinita	glutinata	-	JQ799900_Microperforates_Globigerinita_glutinata_IV_NA_NA;FJ643296_Microperforates_Globigerinita_glutinata_III_NA_NA;KM193199_Microperforates_Globigerinita_glutinata_NA_NA_NA;AY453136_Microperforates_Globigerinita_glutinata_III_NA_NA	Microperforates	Globigerinita	glutinata	I	Microperforates_Globigerinita_glutinata_I
ISU58	4	23	Yes	R-297_4_23_1	0	0	0	0	0	4	0	0	0	0	0	0	0	0	0	0	0	0	6	5	0	8	0	0	0	0	0	0	0	0	0	1	Microperforates_Globigerinita_glutinata	Microperforates	Globigerinita	glutinata	-	JQ799900_Microperforates_Globigerinita_glutinata_IV_NA_NA;FJ643296_Microperforates_Globigerinita_glutinata_III_NA_NA;KM193199_Microperforates_Globigerinita_glutinata_NA_NA_NA;AY453136_Microperforates_Globigerinita_glutinata_III_NA_NA	Microperforates	Globigerinita	glutinata	III	Microperforates_Globigerinita_glutinata_III
ISU580	1	3	NO	-	0	0	0	0	0	0	0	0	0	0	0	0	0	0	0	0	0	0	0	0	0	3	0	0	0	0	0	0	0	0	0	1	Spinose_Globigerina_bulloides	Spinose	Globigerina	bulloides	-	GQ293072_Spinose_Globigerina_bulloides_I_c_NA;GU060421_Spinose_Globigerina_bulloides_I_e_NA;GQ293070_Spinose_Globigerina_bulloides_I_d_NA;Z83957_Spinose_Globigerina_bulloides_NA_NA_NA	-	-	-	-	-
ISU581	2	5	Yes	R-629_2_5_1	0	0	0	0	0	0	0	0	0	0	0	0	0	0	0	0	0	0	0	3	0	2	0	0	0	0	0	0	0	0	0	1	Microperforates_Candeina_nitida_NA_NA_NA	Microperforates	Candeina	nitida	NA	NAAB263435_Microperforates_Candeina_nitida_NA_NA_NA;	Microperforates	Candeina	nitida	I	Microperforates_Candeina_nitida_I
ISU582	1	3	NO	-	0	0	0	0	0	0	0	0	0	0	0	0	0	0	0	0	0	0	0	0	0	0	0	0	0	0	0	0	3	0	0	1	Non-Spinose_Neogloboquadrina_pachyderma_IV_NA_NA	Non-Spinose	Neogloboquadrina	pachyderma	IV	NAKM193680_Non-Spinose_Neogloboquadrina_pachyderma_IV_NA_NA;	-	-	-	-	-
ISU583	5	102	Yes	R-119_5_102_1	0	0	0	0	4	14	0	0	0	0	0	0	0	0	0	0	0	0	21	33	0	30	0	0	0	0	0	0	0	0	0	1	Microperforates_Globigerinita_glutinata	Microperforates	Globigerinita	glutinata	-	FJ643296_Microperforates_Globigerinita_glutinata_III_NA_NA;KM193199_Microperforates_Globigerinita_glutinata_NA_NA_NA;FJ643277_Microperforates_Globigerinita_glutinata_III_NA_NA;AY453136_Microperforates_Globigerinita_glutinata_III_NA_NA;JQ799900_Microperforates_Globigerinita_glutinata_IV_NA_NA;	Microperforates	Globigerinita	glutinata	III	Microperforates_Globigerinita_glutinata_III
ISU584	5	36	Yes	R-236_5_36_1	0	0	0	0	3	2	0	0	0	0	0	0	0	0	0	0	0	0	7	14	0	10	0	0	0	0	0	0	0	0	0	1	Microperforates_Globigerinita_glutinata	Microperforates	Globigerinita	glutinata	-	FJ643296_Microperforates_Globigerinita_glutinata_III_NA_NA;KM193199_Microperforates_Globigerinita_glutinata_NA_NA_NA;FJ643277_Microperforates_Globigerinita_glutinata_III_NA_NA;AY453136_Microperforates_Globigerinita_glutinata_III_NA_NA;JQ799900_Microperforates_Globigerinita_glutinata_IV_NA_NA;	Microperforates	Globigerinita	glutinata	III	Microperforates_Globigerinita_glutinata_III
ISU585	5	53	Yes	R-176_5_53_1	0	0	0	0	5	13	0	0	0	0	0	0	0	0	0	0	0	0	11	11	0	13	0	0	0	0	0	0	0	0	0	1	Microperforates_Globigerinita_glutinata	Microperforates	Globigerinita	glutinata	-	FJ643296_Microperforates_Globigerinita_glutinata_III_NA_NA;KM193199_Microperforates_Globigerinita_glutinata_NA_NA_NA;FJ643277_Microperforates_Globigerinita_glutinata_III_NA_NA;AY453136_Microperforates_Globigerinita_glutinata_III_NA_NA;JQ799900_Microperforates_Globigerinita_glutinata_IV_NA_NA;	Microperforates	Globigerinita	glutinata	III	Microperforates_Globigerinita_glutinata_III
ISU586	1	2	NO	-	0	0	0	0	0	2	0	0	0	0	0	0	0	0	0	0	0	0	0	0	0	0	0	0	0	0	0	0	0	0	0	1	Non-Spiral_Galietelia_vivans_NA_NA_NA	Non-Spiral	Galietelia	vivans	NA	NAAB364519_Non-Spiral_Galietelia_vivans_NA_NA_NA;	-	-	-	-	-
ISU587	3	10	Yes	R-468_3_10_1	0	0	0	0	0	0	0	0	0	0	0	0	0	0	0	0	0	0	2	2	0	6	0	0	0	0	0	0	0	0	0	1	Microperforates_Globigerinita_glutinata_III_NA_NA	Microperforates	Globigerinita	glutinata	III	NAFJ643283_Microperforates_Globigerinita_glutinata_III_NA_NA;	Microperforates	Globigerinita	glutinata	III	Microperforates_Globigerinita_glutinata_III
ISU588	4	32	Yes	R-252_4_32_4	0	0	0	0	3	21	0	0	0	0	0	0	0	0	0	0	0	0	0	2	0	6	0	0	0	0	0	0	0	0	0	4	Microperforates_Globigerinita_glutinata	Microperforates	Globigerinita	glutinata	-	KM193484_Microperforates_Globigerinita_glutinata_NA_NA_NA;FJ643286_Microperforates_Globigerinita_glutinata_I_NA_NA	Microperforates	Globigerinita	glutinata	I	Microperforates_Globigerinita_glutinata_I
ISU589	3	10	Yes	R-454_3_10_7	0	0	0	0	0	4	0	0	0	0	0	0	0	0	0	0	0	0	4	0	0	2	0	0	0	0	0	0	0	0	0	7	Microperforates_Globigerinita_uvula	Microperforates	Globigerinita	uvula	-	FJ643298_Microperforates_Globigerinita_uvula_I_NA_NA;KM193079_Microperforates_Globigerinita_uvula_NA_NA_NA;KM193070_Microperforates_Globigerinita_uvula_NA_NA_NA;	Microperforates	Globigerinita	uvula	I	Microperforates_Globigerinita_uvula_I
ISU59	2	8	Yes	R-511_2_8_6	0	0	0	0	0	0	0	0	0	0	0	0	0	0	0	0	0	0	0	4	0	4	0	0	0	0	0	0	0	0	0	6	Microperforates_Globigerinita_glutinata	Microperforates	Globigerinita	glutinata	-	FJ643286_Microperforates_Globigerinita_glutinata_I_NA_NA;KM193484_Microperforates_Globigerinita_glutinata_NA_NA_NA	Microperforates	Globigerinita	glutinata	III	Microperforates_Globigerinita_glutinata_III
ISU590	3	12	Yes	R-420_3_12_1	0	0	0	0	0	3	0	0	0	0	0	0	0	0	0	0	0	0	4	5	0	0	0	0	0	0	0	0	0	0	0	1	Microperforates_Globigerinita_glutinata	Microperforates	Globigerinita	glutinata	-	JQ799900_Microperforates_Globigerinita_glutinata_IV_NA_NA;FJ643296_Microperforates_Globigerinita_glutinata_III_NA_NA;KM193199_Microperforates_Globigerinita_glutinata_NA_NA_NA;AY453136_Microperforates_Globigerinita_glutinata_III_NA_NA	Microperforates	Globigerinita	glutinata	III	Microperforates_Globigerinita_glutinata_III
ISU591	3	10	Yes	R-471_3_10_1	0	0	0	0	2	5	0	0	0	0	0	0	0	0	0	0	0	0	0	3	0	0	0	0	0	0	0	0	0	0	0	1	Microperforates_Globigerinita_glutinata_III_NA_NA	Microperforates	Globigerinita	glutinata	III	NAFJ643283_Microperforates_Globigerinita_glutinata_III_NA_NA;	Microperforates	Globigerinita	glutinata	III	Microperforates_Globigerinita_glutinata_III
ISU592	1	2	NO	-	0	0	0	0	0	0	0	0	0	0	0	0	0	0	0	0	0	0	0	0	0	0	0	0	0	0	0	0	2	0	0	1	Non-Spinose_Neogloboquadrina_pachyderma_IV_NA_NA	Non-Spinose	Neogloboquadrina	pachyderma	IV	NAKM193550_Non-Spinose_Neogloboquadrina_pachyderma_IV_NA_NA;KM193530_Non-Spinose_Neogloboquadrina_pachyderma_IV_NA_NA;KM193284_Non-Spinose_Neogloboquadrina_pachyderma_IV_NA_NA;KM193861_Non-Spinose_Neogloboquadrina_pachyderma_IV_NA_NA;KM193614_Non-Spinose_Neogloboquadrina_pachyderma_IV_NA_NA;KM193889_Non-Spinose_Neogloboquadrina_pachyderma_IV_NA_NA;KM193556_Non-Spinose_Neogloboquadrina_pachyderma_…	-	-	-	-	-
ISU593	3	7	Yes	R-533_3_7_1	0	0	0	0	0	2	0	0	0	0	0	0	0	0	0	0	0	0	0	3	0	2	0	0	0	0	0	0	0	0	0	1	Microperforates_Globigerinita_glutinata_III_NA_NA	Microperforates	Globigerinita	glutinata	III	NAFJ643283_Microperforates_Globigerinita_glutinata_III_NA_NA;	Microperforates	Globigerinita	glutinata	III	Microperforates_Globigerinita_glutinata_III
ISU594	1	3	NO	-	0	0	0	0	0	0	0	0	0	0	0	0	0	0	0	0	0	0	0	0	0	3	0	0	0	0	0	0	0	0	0	5	Microperforates_Globigerinita_uvula	Microperforates	Globigerinita	uvula	-	KM193079_Microperforates_Globigerinita_uvula_NA_NA_NA;KM193160_Microperforates_Globigerinita_uvula_NA_NA_NA;FJ643298_Microperforates_Globigerinita_uvula_I_NA_NA;KM193075_Microperforates_Globigerinita_uvula_NA_NA_NA;KM193070_Microperforates_Globigerinita_uvula_NA_NA_NA;	-	-	-	-	-
ISU595	9	107	Yes	R-116_9_107_2	40	12	4	0	0	0	0	0	0	0	0	0	5	12	0	0	8	3	0	0	0	0	0	0	0	0	0	0	0	10	13	2	Microperforates_Globigerinita_uvula	Microperforates	Globigerinita	uvula	-	KM193181_Microperforates_Globigerinita_uvula_NA_NA_NA;KM193691_Microperforates_Globigerinita_uvula_NA_NA_NA;KM193364_Microperforates_Globigerinita_uvula_NA_NA_NA;KM193357_Microperforates_Globigerinita_uvula_NA_NA_NA;AF387173_Microperforates_Globigerinita_uvula_II_NA_NA;KM194324_Microperforates_Globigerinita_uvula_NA_NA_NA;KM193324_Microperforates_Globigerinita_uvula_NA_NA_NA;	Microperforates	Globigerinita	uvula	II	Microperforates_Globigerinita_uvula_II
ISU596	2	9	Yes	R-479_2_9_1	0	0	0	0	0	0	0	0	0	0	7	2	0	0	0	0	0	0	0	0	0	0	0	0	0	0	0	0	0	0	0	1	Non-Spinose_Neogloboquadrina_pachyderma_I_NA_NA	Non-Spinose	Neogloboquadrina	pachyderma	I	NAAY305329_Non-Spinose_Neogloboquadrina_pachyderma_I_NA_NA;	Non-Spinose	Neogloboquadrina	pachyderma	I	Non-Spinose_Neogloboquadrina_pachyderma_I
ISU597	1	2	NO	-	0	0	0	0	0	0	0	0	0	0	0	0	0	0	0	0	0	0	0	0	0	2	0	0	0	0	0	0	0	0	0	2	Microperforates_Globigerinita_glutinata	Microperforates	Globigerinita	glutinata	-	FJ643296_Microperforates_Globigerinita_glutinata_III_NA_NA;JQ799900_Microperforates_Globigerinita_glutinata_IV_NA_NA;KM193199_Microperforates_Globigerinita_glutinata_NA_NA_NA;AY453136_Microperforates_Globigerinita_glutinata_III_NA_NA	-	-	-	-	-
ISU598	1	2	NO	-	2	0	0	0	0	0	0	0	0	0	0	0	0	0	0	0	0	0	0	0	0	0	0	0	0	0	0	0	0	0	0	1	Microperforates_Globigerinita_uvula	Microperforates	Globigerinita	uvula	-	KM193181_Microperforates_Globigerinita_uvula_NA_NA_NA;KM193691_Microperforates_Globigerinita_uvula_NA_NA_NA;KM193364_Microperforates_Globigerinita_uvula_NA_NA_NA;AF387173_Microperforates_Globigerinita_uvula_II_NA_NA;KM194324_Microperforates_Globigerinita_uvula_NA_NA_NA;	-	-	-	-	-
ISU599	5	42	Yes	R-216_5_42_1	0	0	0	0	7	4	0	0	0	0	0	0	0	0	0	0	0	0	7	15	0	9	0	0	0	0	0	0	0	0	0	1	Microperforates_Candeina_nitida_NA_NA_NA	Microperforates	Candeina	nitida	NA	NAAB263435_Microperforates_Candeina_nitida_NA_NA_NA;	Microperforates	Candeina	nitida	I	Microperforates_Candeina_nitida_I
ISU6	4	10	Yes	R-453_4_10_1	0	2	0	0	0	0	0	0	0	0	2	4	0	0	0	0	0	0	0	0	0	0	0	0	0	2	0	0	0	0	0	1	Non-Spinose_Neogloboquadrina_pachyderma_I_NA_NA	Non-Spinose	Neogloboquadrina	pachyderma	I	NAAY305329_Non-Spinose_Neogloboquadrina_pachyderma_I_NA_NA;	Non-Spinose	Neogloboquadrina	pachyderma	I	Non-Spinose_Neogloboquadrina_pachyderma_I
ISU60	1	2	NO	-	0	0	0	0	0	0	0	0	0	0	0	0	0	0	0	0	0	0	0	2	0	0	0	0	0	0	0	0	0	0	0	5	Microperforates_Globigerinita_uvula	Microperforates	Globigerinita	uvula	-	FJ643298_Microperforates_Globigerinita_uvula_I_NA_NA;KM193160_Microperforates_Globigerinita_uvula_NA_NA_NA;KM193075_Microperforates_Globigerinita_uvula_NA_NA_NA;KM193070_Microperforates_Globigerinita_uvula_NA_NA_NA;KM193079_Microperforates_Globigerinita_uvula_NA_NA_NA;	-	-	-	-	-
ISU600	1	2	NO	-	0	0	0	0	0	0	0	0	0	0	0	0	0	0	0	0	0	0	0	0	0	2	0	0	0	0	0	0	0	0	0	2	Microperforates_Candeina_nitida_NA_NA_NA	Microperforates	Candeina	nitida	NA	NAAB468837_Microperforates_Candeina_nitida_NA_NA_NA;AB468836_Microperforates_Candeina_nitida_NA_NA_NA;KJ633212_Microperforates_Candeina_nitida_NA_NA_NA;AB263435_Microperforates_Candeina_nitida_NA_NA_NA	-	-	-	-	-
ISU601	1	3	NO	-	0	0	0	0	0	0	0	0	0	0	0	0	0	0	0	0	0	0	0	0	0	3	0	0	0	0	0	0	0	0	0	1	Spinose_Globigerina_bulloides	Spinose	Globigerina	bulloides	-	GQ293072_Spinose_Globigerina_bulloides_I_c_NA;GU060421_Spinose_Globigerina_bulloides_I_e_NA;GQ293070_Spinose_Globigerina_bulloides_I_d_NA;Z83957_Spinose_Globigerina_bulloides_NA_NA_NA	-	-	-	-	-
ISU602	1	2	NO	-	0	0	0	0	0	2	0	0	0	0	0	0	0	0	0	0	0	0	0	0	0	0	0	0	0	0	0	0	0	0	0	6	Microperforates_Globigerinita_glutinata	Microperforates	Globigerinita	glutinata	-	FJ643286_Microperforates_Globigerinita_glutinata_I_NA_NA;KM193484_Microperforates_Globigerinita_glutinata_NA_NA_NA	-	-	-	-	-
ISU603	1	2	NO	-	0	0	0	0	0	0	0	0	0	0	0	0	0	0	0	0	0	0	0	2	0	0	0	0	0	0	0	0	0	0	0	5	Microperforates_Globigerinita_glutinata	Microperforates	Globigerinita	glutinata	-	JQ799900_Microperforates_Globigerinita_glutinata_IV_NA_NA;FJ643296_Microperforates_Globigerinita_glutinata_III_NA_NA;FJ643277_Microperforates_Globigerinita_glutinata_III_NA_NA;KM193199_Microperforates_Globigerinita_glutinata_NA_NA_NA;AY453136_Microperforates_Globigerinita_glutinata_III_NA_NA;	-	-	-	-	-
ISU604	3	7	Yes	R-548_3_7_1	0	0	0	0	0	0	0	0	0	0	0	0	0	0	0	0	0	0	2	2	0	3	0	0	0	0	0	0	0	0	0	1	Microperforates_Globigerinita_glutinata_III_NA_NA	Microperforates	Globigerinita	glutinata	III	NAFJ643296_Microperforates_Globigerinita_glutinata_III_NA_NA;	Microperforates	Globigerinita	glutinata	III	Microperforates_Globigerinita_glutinata_III
ISU605	2	150	Yes	R-92_2_150_0	0	0	0	0	0	6	0	0	0	0	0	0	0	0	0	0	0	0	0	0	0	144	0	0	0	0	0	0	0	0	0	0	Spinose_Globigerina_falconensis_NA_NA_NA	Spinose	Globigerina	falconensis	NA	NAAF387172_Spinose_Globigerina_falconensis_NA_NA_NA;	Spinose	Globigerina	falconensis	I	Spinose_Globigerina_falconensis_I
ISU606	1	2	NO	-	0	0	0	0	0	2	0	0	0	0	0	0	0	0	0	0	0	0	0	0	0	0	0	0	0	0	0	0	0	0	0	7	Microperforates_Globigerinita_uvula	Microperforates	Globigerinita	uvula	-	FJ643298_Microperforates_Globigerinita_uvula_I_NA_NA;KM193079_Microperforates_Globigerinita_uvula_NA_NA_NA;KM193070_Microperforates_Globigerinita_uvula_NA_NA_NA;	-	-	-	-	-
ISU607	2	5	Yes	R-640_2_5_1	0	0	0	0	2	0	0	0	0	0	0	0	0	0	0	0	0	0	0	3	0	0	0	0	0	0	0	0	0	0	0	1	Microperforates_Globigerinita_glutinata	Microperforates	Globigerinita	glutinata	-	AB468829_Microperforates_Globigerinita_glutinata_II_NA_NA;AB468827_Microperforates_Globigerinita_glutinata_II_NA_NA;FJ643418_Microperforates_Globigerinita_glutinata_NA_NA_NA;	Microperforates	Globigerinita	glutinata	II	Microperforates_Globigerinita_glutinata_II
ISU608	5	44	Yes	R-209_5_44_4	0	0	0	0	3	7	0	0	0	0	0	0	0	0	0	0	0	0	3	23	0	8	0	0	0	0	0	0	0	0	0	4	Microperforates_Globigerinita_glutinata	Microperforates	Globigerinita	glutinata	-	JQ799900_Microperforates_Globigerinita_glutinata_IV_NA_NA;FJ643296_Microperforates_Globigerinita_glutinata_III_NA_NA;FJ643277_Microperforates_Globigerinita_glutinata_III_NA_NA;KM193199_Microperforates_Globigerinita_glutinata_NA_NA_NA;AY453136_Microperforates_Globigerinita_glutinata_III_NA_NA;	Microperforates	Globigerinita	glutinata	III	Microperforates_Globigerinita_glutinata_III
ISU609	1	3	NO	-	0	0	0	0	0	0	0	0	0	0	0	3	0	0	0	0	0	0	0	0	0	0	0	0	0	0	0	0	0	0	0	1	Non-Spinose_Neogloboquadrina_pachyderma_I_NA_NA	Non-Spinose	Neogloboquadrina	pachyderma	I	NAAY305329_Non-Spinose_Neogloboquadrina_pachyderma_I_NA_NA;	-	-	-	-	-
ISU61	1	2	NO	-	0	0	0	0	0	0	0	0	0	0	0	0	0	0	0	0	0	0	0	0	0	2	0	0	0	0	0	0	0	0	0	2	Microperforates_Globigerinita_glutinata	Microperforates	Globigerinita	glutinata	-	KM193484_Microperforates_Globigerinita_glutinata_NA_NA_NA;FJ643286_Microperforates_Globigerinita_glutinata_I_NA_NA	-	-	-	-	-
ISU610	1	2	NO	-	2	0	0	0	0	0	0	0	0	0	0	0	0	0	0	0	0	0	0	0	0	0	0	0	0	0	0	0	0	0	0	10	Non-Spinose_Globoquadrina_conglomerata_NA_NA_NA	Non-Spinose	Globoquadrina	conglomerata	NA	NAKJ633133_Non-Spinose_Globoquadrina_conglomerata_NA_NA_NA;KJ633130_Non-Spinose_Globoquadrina_conglomerata_NA_NA_NA	-	-	-	-	-
ISU611	1	2	NO	-	0	0	0	0	0	0	0	0	0	0	0	0	0	0	0	0	0	0	0	0	0	2	0	0	0	0	0	0	0	0	0	2	Microperforates_Globigerinita_glutinata_III_NA_NA	Microperforates	Globigerinita	glutinata	III	NAFJ643283_Microperforates_Globigerinita_glutinata_III_NA_NA;	-	-	-	-	-
ISU612	1	2	NO	-	0	0	0	0	0	0	0	0	0	0	0	0	0	0	0	0	0	0	0	0	0	0	0	0	0	2	0	0	0	0	0	1	Non-Spinose_Neogloboquadrina_pachyderma_I_NA_NA	Non-Spinose	Neogloboquadrina	pachyderma	I	NAAY305329_Non-Spinose_Neogloboquadrina_pachyderma_I_NA_NA;	-	-	-	-	-
ISU613	1	2	NO	-	0	0	0	0	0	0	0	0	0	0	0	0	0	0	0	0	0	0	0	0	0	0	0	0	0	2	0	0	0	0	0	1	Non-Spinose_Neogloboquadrina_pachyderma_I_NA_NA	Non-Spinose	Neogloboquadrina	pachyderma	I	NAAY305329_Non-Spinose_Neogloboquadrina_pachyderma_I_NA_NA;	-	-	-	-	-
ISU614	1	4	NO	-	0	0	0	0	0	4	0	0	0	0	0	0	0	0	0	0	0	0	0	0	0	0	0	0	0	0	0	0	0	0	0	7	Microperforates_Globigerinita_uvula	Microperforates	Globigerinita	uvula	-	FJ643298_Microperforates_Globigerinita_uvula_I_NA_NA;KM193079_Microperforates_Globigerinita_uvula_NA_NA_NA;KM193070_Microperforates_Globigerinita_uvula_NA_NA_NA;	-	-	-	-	-
ISU615	1	2	NO	-	0	0	0	0	0	0	0	0	0	0	0	0	0	0	0	0	0	0	0	2	0	0	0	0	0	0	0	0	0	0	0	1	Microperforates_Globigerinita_glutinata	Microperforates	Globigerinita	glutinata	-	JQ799900_Microperforates_Globigerinita_glutinata_IV_NA_NA;FJ643296_Microperforates_Globigerinita_glutinata_III_NA_NA;KM193199_Microperforates_Globigerinita_glutinata_NA_NA_NA;AY453136_Microperforates_Globigerinita_glutinata_III_NA_NA	-	-	-	-	-
ISU616	5	85	Yes	R-134_5_85_1	0	0	0	0	5	10	0	0	0	0	0	0	0	0	0	0	0	0	19	21	0	30	0	0	0	0	0	0	0	0	0	1	Microperforates_Globigerinita_glutinata_III_NA_NA	Microperforates	Globigerinita	glutinata	III	NAFJ643283_Microperforates_Globigerinita_glutinata_III_NA_NA;	Microperforates	Globigerinita	glutinata	III	Microperforates_Globigerinita_glutinata_III
ISU617	4	35	Yes	R-244_4_35_2	0	0	0	0	0	12	0	0	0	0	0	0	0	0	0	0	0	0	9	10	0	4	0	0	0	0	0	0	0	0	0	2	Microperforates_Globigerinita_glutinata	Microperforates	Globigerinita	glutinata	-	JQ799900_Microperforates_Globigerinita_glutinata_IV_NA_NA;FJ643296_Microperforates_Globigerinita_glutinata_III_NA_NA;FJ643277_Microperforates_Globigerinita_glutinata_III_NA_NA;KM193199_Microperforates_Globigerinita_glutinata_NA_NA_NA;AY453136_Microperforates_Globigerinita_glutinata_III_NA_NA;	Microperforates	Globigerinita	glutinata	III	Microperforates_Globigerinita_glutinata_III
ISU618	1	2	NO	-	0	0	0	2	0	0	0	0	0	0	0	0	0	0	0	0	0	0	0	0	0	0	0	0	0	0	0	0	0	0	0	3	Microperforates_Globigerinita_glutinata	Microperforates	Globigerinita	glutinata	-	FJ643296_Microperforates_Globigerinita_glutinata_III_NA_NA;KM193303_Microperforates_Globigerinita_glutinata_NA_NA_NA;AY453136_Microperforates_Globigerinita_glutinata_III_NA_NA;KM193199_Microperforates_Globigerinita_glutinata_NA_NA_NA;FJ643277_Microperforates_Globigerinita_glutinata_III_NA_NA;JQ799900_Microperforates_Globigerinita_glutinata_IV_NA_NA;FJ643288_Microperforates_Globigerinita_glutinata…	-	-	-	-	-
ISU619	5	50	Yes	R-187_5_50_1	0	0	0	0	2	11	0	0	0	0	0	0	0	0	0	0	0	0	15	9	0	13	0	0	0	0	0	0	0	0	0	1	Microperforates_Globigerinita_glutinata_III_NA_NA	Microperforates	Globigerinita	glutinata	III	NAFJ643283_Microperforates_Globigerinita_glutinata_III_NA_NA;	Microperforates	Globigerinita	glutinata	III	Microperforates_Globigerinita_glutinata_III
ISU62	1	2	NO	-	0	0	0	0	0	2	0	0	0	0	0	0	0	0	0	0	0	0	0	0	0	0	0	0	0	0	0	0	0	0	0	1	Microperforates_Globigerinita_glutinata	Microperforates	Globigerinita	glutinata	-	JQ799900_Microperforates_Globigerinita_glutinata_IV_NA_NA;FJ643296_Microperforates_Globigerinita_glutinata_III_NA_NA;KM193199_Microperforates_Globigerinita_glutinata_NA_NA_NA;AY453136_Microperforates_Globigerinita_glutinata_III_NA_NA	-	-	-	-	-
ISU620	6	164	Yes	R-87_6_164_1	0	0	0	2	14	57	0	0	0	0	0	0	0	0	0	0	0	0	26	31	0	34	0	0	0	0	0	0	0	0	0	1	Microperforates_Globigerinita_glutinata_III_NA_NA	Microperforates	Globigerinita	glutinata	III	NAFJ643283_Microperforates_Globigerinita_glutinata_III_NA_NA;	Microperforates	Globigerinita	glutinata	III	Microperforates_Globigerinita_glutinata_III
ISU621	4	16	Yes	R-363_4_16_7	0	0	0	0	7	5	0	0	0	0	0	0	0	0	0	0	0	0	0	2	0	2	0	0	0	0	0	0	0	0	0	7	Microperforates_Globigerinita_uvula	Microperforates	Globigerinita	uvula	-	FJ643298_Microperforates_Globigerinita_uvula_I_NA_NA;KM193160_Microperforates_Globigerinita_uvula_NA_NA_NA;KM193079_Microperforates_Globigerinita_uvula_NA_NA_NA;KM193075_Microperforates_Globigerinita_uvula_NA_NA_NA;KM193070_Microperforates_Globigerinita_uvula_NA_NA_NA;	Microperforates	Globigerinita	uvula	I	Microperforates_Globigerinita_uvula_I
ISU622	1	3	NO	-	0	0	0	0	0	0	0	0	0	0	0	0	0	0	0	0	0	0	0	3	0	0	0	0	0	0	0	0	0	0	0	5	Microperforates_Globigerinita_uvula	Microperforates	Globigerinita	uvula	-	FJ643298_Microperforates_Globigerinita_uvula_I_NA_NA;KM193160_Microperforates_Globigerinita_uvula_NA_NA_NA;KM193075_Microperforates_Globigerinita_uvula_NA_NA_NA;KM193070_Microperforates_Globigerinita_uvula_NA_NA_NA;KM193079_Microperforates_Globigerinita_uvula_NA_NA_NA;	-	-	-	-	-
ISU623	2	18	Yes	R-344_2_18_6	0	0	0	0	0	16	0	0	0	0	0	0	0	0	0	0	0	0	0	0	0	2	0	0	0	0	0	0	0	0	0	6	Microperforates_Globigerinita_uvula	Microperforates	Globigerinita	uvula	-	FJ643298_Microperforates_Globigerinita_uvula_I_NA_NA;KM193079_Microperforates_Globigerinita_uvula_NA_NA_NA;KM193070_Microperforates_Globigerinita_uvula_NA_NA_NA;	Microperforates	Globigerinita	uvula	I	Microperforates_Globigerinita_uvula_I
ISU624	4	74	Yes	R-146_4_74_1	0	0	0	0	0	10	0	0	0	0	0	0	0	0	0	0	0	0	12	24	0	28	0	0	0	0	0	0	0	0	0	1	Microperforates_Globigerinita_glutinata	Microperforates	Globigerinita	glutinata	-	JQ799900_Microperforates_Globigerinita_glutinata_IV_NA_NA;FJ643296_Microperforates_Globigerinita_glutinata_III_NA_NA;KM193199_Microperforates_Globigerinita_glutinata_NA_NA_NA;AY453136_Microperforates_Globigerinita_glutinata_III_NA_NA	Microperforates	Globigerinita	glutinata	III	Microperforates_Globigerinita_glutinata_III
ISU625	1	2	NO	-	0	0	0	0	0	0	0	0	0	0	0	0	0	0	0	0	0	0	0	0	0	0	0	0	0	0	0	0	2	0	0	1	Non-Spinose_Neogloboquadrina_pachyderma_IV_NA_NA	Non-Spinose	Neogloboquadrina	pachyderma	IV	NAKM193680_Non-Spinose_Neogloboquadrina_pachyderma_IV_NA_NA;	-	-	-	-	-
ISU626	1	6	NO	-	0	0	0	0	0	0	0	0	0	0	0	0	0	0	0	0	0	0	0	0	0	6	0	0	0	0	0	0	0	0	0	4	Microperforates_Globigerinita_glutinata	Microperforates	Globigerinita	glutinata	-	FJ643286_Microperforates_Globigerinita_glutinata_I_NA_NA;KM193484_Microperforates_Globigerinita_glutinata_NA_NA_NA	-	-	-	-	-
ISU627	1	2	NO	-	0	0	0	0	0	0	0	0	0	0	0	0	0	0	0	0	2	0	0	0	0	0	0	0	0	0	0	0	0	0	0	1	Microperforates_Globigerinita_uvula	Microperforates	Globigerinita	uvula	-	AF387173_Microperforates_Globigerinita_uvula_II_NA_NA;KM193181_Microperforates_Globigerinita_uvula_NA_NA_NA	-	-	-	-	-
ISU628	1	2	NO	-	0	0	0	0	0	0	0	0	0	0	0	0	0	0	0	0	0	0	0	2	0	0	0	0	0	0	0	0	0	0	0	6	Microperforates_Globigerinita_glutinata	Microperforates	Globigerinita	glutinata	-	FJ643286_Microperforates_Globigerinita_glutinata_I_NA_NA;KM193484_Microperforates_Globigerinita_glutinata_NA_NA_NA	-	-	-	-	-
ISU629	5	218	Yes	R-71_5_218_1	0	0	0	0	13	103	0	0	0	0	0	0	0	0	0	0	0	0	26	39	0	37	0	0	0	0	0	0	0	0	0	1	Microperforates_Globigerinita_glutinata_III_NA_NA	Microperforates	Globigerinita	glutinata	III	NAFJ643283_Microperforates_Globigerinita_glutinata_III_NA_NA;	Microperforates	Globigerinita	glutinata	III	Microperforates_Globigerinita_glutinata_III
ISU63	5	16	Yes	R-367_5_16_1	0	0	0	0	3	3	0	0	0	0	0	0	0	0	0	0	0	0	2	4	0	4	0	0	0	0	0	0	0	0	0	1	Microperforates_Globigerinita_glutinata	Microperforates	Globigerinita	glutinata	-	FJ643296_Microperforates_Globigerinita_glutinata_III_NA_NA;KM193199_Microperforates_Globigerinita_glutinata_NA_NA_NA;FJ643277_Microperforates_Globigerinita_glutinata_III_NA_NA;AY453136_Microperforates_Globigerinita_glutinata_III_NA_NA;JQ799900_Microperforates_Globigerinita_glutinata_IV_NA_NA;	Microperforates	Globigerinita	glutinata	III	Microperforates_Globigerinita_glutinata_III
ISU630	1	2	NO	-	0	0	0	0	0	0	0	0	0	0	0	0	0	0	0	0	0	0	0	2	0	0	0	0	0	0	0	0	0	0	0	5	Microperforates_Globigerinita_uvula	Microperforates	Globigerinita	uvula	-	FJ643298_Microperforates_Globigerinita_uvula_I_NA_NA;KM193160_Microperforates_Globigerinita_uvula_NA_NA_NA;KM193075_Microperforates_Globigerinita_uvula_NA_NA_NA;KM193070_Microperforates_Globigerinita_uvula_NA_NA_NA;KM193079_Microperforates_Globigerinita_uvula_NA_NA_NA;	-	-	-	-	-
ISU631	5	48	Yes	R-192_5_48_1	0	0	0	0	4	7	0	0	0	0	0	0	0	0	0	0	0	0	11	10	0	16	0	0	0	0	0	0	0	0	0	1	Microperforates_Globigerinita_glutinata	Microperforates	Globigerinita	glutinata	-	FJ643296_Microperforates_Globigerinita_glutinata_III_NA_NA;KM193199_Microperforates_Globigerinita_glutinata_NA_NA_NA;FJ643277_Microperforates_Globigerinita_glutinata_III_NA_NA;AY453136_Microperforates_Globigerinita_glutinata_III_NA_NA;JQ799900_Microperforates_Globigerinita_glutinata_IV_NA_NA;	Microperforates	Globigerinita	glutinata	III	Microperforates_Globigerinita_glutinata_III
ISU632	1	33	Yes	R-247_1_33_0	33	0	0	0	0	0	0	0	0	0	0	0	0	0	0	0	0	0	0	0	0	0	0	0	0	0	0	0	0	0	0	0	Non-Spinose_Neogloboquadrina_incompta	Non-Spinose	Neogloboquadrina	incompta	-	AF250117_Non-Spinose_Neogloboquadrina_incompta_I_NA_NA;KM193849_Non-Spinose_Neogloboquadrina_incompta_I_NA_NA;KM194290_Non-Spinose_Neogloboquadrina_incompta_NA_NA_NA;	Non-Spinose	Neogloboquadrina	incompta	I	Non-Spinose_Neogloboquadrina_incompta_I
ISU633	1	2	NO	-	0	0	0	0	0	0	0	0	0	0	0	0	0	0	0	0	0	0	0	0	0	0	0	0	0	0	0	0	2	0	0	1	Non-Spinose_Neogloboquadrina_pachyderma_IV_NA_NA	Non-Spinose	Neogloboquadrina	pachyderma	IV	NAKM193550_Non-Spinose_Neogloboquadrina_pachyderma_IV_NA_NA;KM193530_Non-Spinose_Neogloboquadrina_pachyderma_IV_NA_NA;KM193284_Non-Spinose_Neogloboquadrina_pachyderma_IV_NA_NA;KM193861_Non-Spinose_Neogloboquadrina_pachyderma_IV_NA_NA;KM193614_Non-Spinose_Neogloboquadrina_pachyderma_IV_NA_NA;KM193889_Non-Spinose_Neogloboquadrina_pachyderma_IV_NA_NA;KM193556_Non-Spinose_Neogloboquadrina_pachyderma_…	-	-	-	-	-
ISU634	2	4	Yes	R-691_2_4_3	0	0	0	0	0	2	0	0	0	0	0	0	0	0	0	0	0	0	0	0	0	2	0	0	0	0	0	0	0	0	0	3	Microperforates_Globigerinita_glutinata	Microperforates	Globigerinita	glutinata	-	FJ643294_Microperforates_Globigerinita_glutinata_I_NA_NA;KM193497_Microperforates_Globigerinita_glutinata_NA_NA_NA;FJ643283_Microperforates_Globigerinita_glutinata_III_NA_NA;KM193151_Microperforates_Globigerinita_glutinata_NA_NA_NA	Microperforates	Globigerinita	glutinata	I	Microperforates_Globigerinita_glutinata_I
ISU635	5	42	Yes	R-217_5_42_1	0	0	0	0	2	8	0	0	0	0	0	0	0	0	0	0	0	0	7	14	0	11	0	0	0	0	0	0	0	0	0	1	Microperforates_Globigerinita_glutinata	Microperforates	Globigerinita	glutinata	-	FJ643296_Microperforates_Globigerinita_glutinata_III_NA_NA;KM193199_Microperforates_Globigerinita_glutinata_NA_NA_NA;FJ643277_Microperforates_Globigerinita_glutinata_III_NA_NA;AY453136_Microperforates_Globigerinita_glutinata_III_NA_NA;JQ799900_Microperforates_Globigerinita_glutinata_IV_NA_NA;	Microperforates	Globigerinita	glutinata	III	Microperforates_Globigerinita_glutinata_III
ISU636	1	4	NO	-	0	0	0	0	0	0	0	0	0	0	0	0	0	0	0	0	0	0	0	0	0	4	0	0	0	0	0	0	0	0	0	1	Spinose_Globigerina_bulloides	Spinose	Globigerina	bulloides	-	GQ293072_Spinose_Globigerina_bulloides_I_c_NA;GU060421_Spinose_Globigerina_bulloides_I_e_NA;GQ293070_Spinose_Globigerina_bulloides_I_d_NA;Z83957_Spinose_Globigerina_bulloides_NA_NA_NA	-	-	-	-	-
ISU637	5	56	Yes	R-173_5_56_1	0	0	0	0	2	17	0	0	0	0	0	0	0	0	0	0	0	0	11	10	0	16	0	0	0	0	0	0	0	0	0	1	Microperforates_Globigerinita_glutinata_III_NA_NA	Microperforates	Globigerinita	glutinata	III	NAFJ643283_Microperforates_Globigerinita_glutinata_III_NA_NA;	Microperforates	Globigerinita	glutinata	III	Microperforates_Globigerinita_glutinata_III
ISU638	4	19	Yes	R-341_4_19_1	0	0	0	0	0	7	0	0	0	0	0	0	0	0	0	0	0	0	4	3	0	5	0	0	0	0	0	0	0	0	0	1	Microperforates_Globigerinita_glutinata	Microperforates	Globigerinita	glutinata	-	JQ799900_Microperforates_Globigerinita_glutinata_IV_NA_NA;FJ643296_Microperforates_Globigerinita_glutinata_III_NA_NA;KM193199_Microperforates_Globigerinita_glutinata_NA_NA_NA;AY453136_Microperforates_Globigerinita_glutinata_III_NA_NA	Microperforates	Globigerinita	glutinata	III	Microperforates_Globigerinita_glutinata_III
ISU639	2	8	Yes	R-492_2_8_1	0	0	0	0	0	0	0	0	0	3	5	0	0	0	0	0	0	0	0	0	0	0	0	0	0	0	0	0	0	0	0	1	Non-Spinose_Neogloboquadrina_pachyderma_I_NA_NA	Non-Spinose	Neogloboquadrina	pachyderma	I	NAAY305329_Non-Spinose_Neogloboquadrina_pachyderma_I_NA_NA;	Non-Spinose	Neogloboquadrina	pachyderma	I	Non-Spinose_Neogloboquadrina_pachyderma_I
ISU64	3	85	Yes	R-133_3_85_1	0	0	0	0	0	76	0	0	0	0	0	0	0	0	0	0	0	0	4	0	0	5	0	0	0	0	0	0	0	0	0	1	Microperforates_Globigerinita_glutinata_III_NA_NA	Microperforates	Globigerinita	glutinata	III	NAFJ643283_Microperforates_Globigerinita_glutinata_III_NA_NA;	Microperforates	Globigerinita	glutinata	III	Microperforates_Globigerinita_glutinata_III
ISU640	1	2	NO	-	0	0	0	0	0	0	0	0	0	0	0	0	0	0	0	0	0	0	0	2	0	0	0	0	0	0	0	0	0	0	0	2	Microperforates_Globigerinita_glutinata	Microperforates	Globigerinita	glutinata	-	JQ799900_Microperforates_Globigerinita_glutinata_IV_NA_NA;FJ643296_Microperforates_Globigerinita_glutinata_III_NA_NA;KM193199_Microperforates_Globigerinita_glutinata_NA_NA_NA;AY453136_Microperforates_Globigerinita_glutinata_III_NA_NA	-	-	-	-	-
ISU641	4	11	Yes	R-437_4_11_1	0	0	0	0	0	5	0	0	0	0	0	0	0	0	0	0	0	0	2	2	0	2	0	0	0	0	0	0	0	0	0	1	Microperforates_Globigerinita_glutinata	Microperforates	Globigerinita	glutinata	-	JQ799900_Microperforates_Globigerinita_glutinata_IV_NA_NA;FJ643296_Microperforates_Globigerinita_glutinata_III_NA_NA;KM193199_Microperforates_Globigerinita_glutinata_NA_NA_NA;AY453136_Microperforates_Globigerinita_glutinata_III_NA_NA	Microperforates	Globigerinita	glutinata	III	Microperforates_Globigerinita_glutinata_III
ISU642	1	4	NO	-	0	0	0	0	0	0	0	0	0	0	0	0	0	0	0	0	0	0	0	4	0	0	0	0	0	0	0	0	0	0	0	1	Microperforates_Candeina_nitida_NA_NA_NA	Microperforates	Candeina	nitida	NA	NAAB468836_Microperforates_Candeina_nitida_NA_NA_NA;	-	-	-	-	-
ISU643	2	4	Yes	R-652_2_4_4	0	0	0	0	0	0	0	0	0	0	0	0	0	0	0	0	0	0	0	2	0	2	0	0	0	0	0	0	0	0	0	4	Spinose_Globigerina_bulloides	Spinose	Globigerina	bulloides	-	Z83957_Spinose_Globigerina_bulloides_NA_NA_NA;GQ293072_Spinose_Globigerina_bulloides_I_c_NA;GQ293070_Spinose_Globigerina_bulloides_I_d_NA;GU060421_Spinose_Globigerina_bulloides_I_e_NA	Microperforates	Globigerinita	uvula	I	Microperforates_Globigerinita_uvula_I
ISU644	1	5	NO	-	0	0	0	0	0	0	0	0	0	0	0	0	0	0	0	0	0	0	0	5	0	0	0	0	0	0	0	0	0	0	0	1	Microperforates_Candeina_nitida_NA_NA_NA	Microperforates	Candeina	nitida	NA	NAAB263435_Microperforates_Candeina_nitida_NA_NA_NA;	-	-	-	-	-
ISU645	5	22	Yes	R-312_5_22_1	0	0	0	0	2	7	0	0	0	0	0	0	0	0	0	0	0	0	2	3	0	8	0	0	0	0	0	0	0	0	0	1	Microperforates_Globigerinita_glutinata	Microperforates	Globigerinita	glutinata	-	FJ643296_Microperforates_Globigerinita_glutinata_III_NA_NA;KM193199_Microperforates_Globigerinita_glutinata_NA_NA_NA;FJ643277_Microperforates_Globigerinita_glutinata_III_NA_NA;AY453136_Microperforates_Globigerinita_glutinata_III_NA_NA;JQ799900_Microperforates_Globigerinita_glutinata_IV_NA_NA;	Microperforates	Globigerinita	glutinata	III	Microperforates_Globigerinita_glutinata_III
ISU646	1	3	NO	-	0	0	0	0	0	0	0	0	0	0	0	0	0	0	0	0	0	0	0	0	0	3	0	0	0	0	0	0	0	0	0	3	Microperforates_Globigerinita_glutinata	Microperforates	Globigerinita	glutinata	-	KM193497_Microperforates_Globigerinita_glutinata_NA_NA_NA;FJ643294_Microperforates_Globigerinita_glutinata_I_NA_NA;KM193151_Microperforates_Globigerinita_glutinata_NA_NA_NA;	-	-	-	-	-
ISU647	3	6	Yes	R-576_3_6_1	0	0	2	0	0	0	0	0	0	0	2	0	0	0	0	0	0	0	0	0	0	0	0	0	0	2	0	0	0	0	0	1	Non-Spinose_Neogloboquadrina_pachyderma_I_NA_NA	Non-Spinose	Neogloboquadrina	pachyderma	I	NAAY305329_Non-Spinose_Neogloboquadrina_pachyderma_I_NA_NA;	Non-Spinose	Neogloboquadrina	pachyderma	I	Non-Spinose_Neogloboquadrina_pachyderma_I
ISU648	2	6	Yes	R-558_2_6_4	0	0	0	0	0	4	0	0	0	0	0	0	0	0	0	0	0	0	0	2	0	0	0	0	0	0	0	0	0	0	0	4	Microperforates_Globigerinita_glutinata	Microperforates	Globigerinita	glutinata	-	FJ643286_Microperforates_Globigerinita_glutinata_I_NA_NA;KM193484_Microperforates_Globigerinita_glutinata_NA_NA_NA	Microperforates	Globigerinita	uvula	I	Microperforates_Globigerinita_uvula_I
ISU649	5	49	Yes	R-189_5_49_1	0	0	0	0	4	18	0	0	0	0	0	0	0	0	0	0	0	0	9	9	0	9	0	0	0	0	0	0	0	0	0	1	Microperforates_Globigerinita_glutinata	Microperforates	Globigerinita	glutinata	-	KM193497_Microperforates_Globigerinita_glutinata_NA_NA_NA;KM193151_Microperforates_Globigerinita_glutinata_NA_NA_NA;FJ643283_Microperforates_Globigerinita_glutinata_III_NA_NA;FJ643294_Microperforates_Globigerinita_glutinata_I_NA_NA	Microperforates	Globigerinita	glutinata	III	Microperforates_Globigerinita_glutinata_III
ISU65	1	2	NO	-	0	0	0	0	0	0	0	0	0	0	0	0	0	0	0	0	0	0	0	2	0	0	0	0	0	0	0	0	0	0	0	1	Microperforates_Candeina_nitida_NA_NA_NA	Microperforates	Candeina	nitida	NA	NAAB263435_Microperforates_Candeina_nitida_NA_NA_NA;	-	-	-	-	-
ISU650	2	6	Yes	R-555_2_6_1	0	0	0	0	0	2	0	0	0	0	0	0	0	0	0	0	0	0	0	0	0	4	0	0	0	0	0	0	0	0	0	1	Microperforates_Globigerinita_glutinata	Microperforates	Globigerinita	glutinata	-	KM193151_Microperforates_Globigerinita_glutinata_NA_NA_NA;KM193497_Microperforates_Globigerinita_glutinata_NA_NA_NA;FJ643294_Microperforates_Globigerinita_glutinata_I_NA_NA;	Spinose	Globigerina	bulloides	I	Spinose_Globigerina_bulloides_I
ISU651	3	367	Yes	R-46_3_367_4	0	0	0	63	0	0	0	0	0	0	0	0	0	0	0	0	0	0	199	0	0	105	0	0	0	0	0	0	0	0	0	4	Microperforates_Candeina_nitida_NA_NA_NA	Microperforates	Candeina	nitida	NA	NAAB263435_Microperforates_Candeina_nitida_NA_NA_NA;AB468836_Microperforates_Candeina_nitida_NA_NA_NA;KJ633212_Microperforates_Candeina_nitida_NA_NA_NA;AB468837_Microperforates_Candeina_nitida_NA_NA_NA	Microperforates	Candeina	nitida	U1	Microperforates_Candeina_nitida_U1
ISU652	2	5	Yes	R-611_2_5_5	0	0	0	0	0	0	0	0	0	0	0	0	0	0	0	0	0	0	3	0	0	2	0	0	0	0	0	0	0	0	0	5	Microperforates_Candeina_nitida_NA_NA_NA	Microperforates	Candeina	nitida	NA	NAAB468837_Microperforates_Candeina_nitida_NA_NA_NA;KJ633212_Microperforates_Candeina_nitida_NA_NA_NA;AB468836_Microperforates_Candeina_nitida_NA_NA_NA;AB263435_Microperforates_Candeina_nitida_NA_NA_NA	Microperforates	Globigerinita	glutinata	III	Microperforates_Globigerinita_glutinata_III
ISU653	1	2	NO	-	0	0	0	0	0	0	0	0	0	0	0	0	0	0	0	0	0	0	0	0	0	2	0	0	0	0	0	0	0	0	0	3	Microperforates_Globigerinita_glutinata	Microperforates	Globigerinita	glutinata	-	KM193497_Microperforates_Globigerinita_glutinata_NA_NA_NA;FJ643294_Microperforates_Globigerinita_glutinata_I_NA_NA;KM193151_Microperforates_Globigerinita_glutinata_NA_NA_NA;	-	-	-	-	-
ISU654	3	241	Yes	R-63_3_241_1	0	0	0	0	0	6	0	0	0	0	0	0	0	0	0	0	0	0	0	231	0	4	0	0	0	0	0	0	0	0	0	1	Microperforates_Globigerinita_glutinata	Microperforates	Globigerinita	glutinata	-	JQ799900_Microperforates_Globigerinita_glutinata_IV_NA_NA;FJ643296_Microperforates_Globigerinita_glutinata_III_NA_NA;KM193199_Microperforates_Globigerinita_glutinata_NA_NA_NA;AY453136_Microperforates_Globigerinita_glutinata_III_NA_NA	Microperforates	Globigerinita	glutinata	III	Microperforates_Globigerinita_glutinata_III
ISU655	4	11	Yes	R-432_4_11_1	0	0	0	0	0	2	0	0	0	0	0	0	0	0	0	0	0	0	3	3	0	3	0	0	0	0	0	0	0	0	0	1	Microperforates_Globigerinita_glutinata_III_NA_NA	Microperforates	Globigerinita	glutinata	III	NAFJ643283_Microperforates_Globigerinita_glutinata_III_NA_NA;	Microperforates	Globigerinita	glutinata	III	Microperforates_Globigerinita_glutinata_III
ISU656	2	6	Yes	R-571_2_6_1	4	0	0	0	0	0	0	0	0	0	0	0	0	0	0	0	0	0	0	0	0	0	0	0	0	0	0	0	0	0	2	1	Microperforates_Globigerinita_uvula	Microperforates	Globigerinita	uvula	-	KM193181_Microperforates_Globigerinita_uvula_NA_NA_NA;KM193691_Microperforates_Globigerinita_uvula_NA_NA_NA;KM193364_Microperforates_Globigerinita_uvula_NA_NA_NA;AF387173_Microperforates_Globigerinita_uvula_II_NA_NA;KM194324_Microperforates_Globigerinita_uvula_NA_NA_NA;	Microperforates	Globigerinita	uvula	II	Microperforates_Globigerinita_uvula_II
ISU657	1	2	NO	-	0	0	0	0	2	0	0	0	0	0	0	0	0	0	0	0	0	0	0	0	0	0	0	0	0	0	0	0	0	0	0	2	Microperforates_Globigerinita_uvula	Microperforates	Globigerinita	uvula	-	FJ643298_Microperforates_Globigerinita_uvula_I_NA_NA;KM193070_Microperforates_Globigerinita_uvula_NA_NA_NA;KM193079_Microperforates_Globigerinita_uvula_NA_NA_NA;	-	-	-	-	-
ISU658	1	8	NO	-	8	0	0	0	0	0	0	0	0	0	0	0	0	0	0	0	0	0	0	0	0	0	0	0	0	0	0	0	0	0	0	1	Microperforates_Globigerinita_uvula	Microperforates	Globigerinita	uvula	-	KM193181_Microperforates_Globigerinita_uvula_NA_NA_NA;KM193691_Microperforates_Globigerinita_uvula_NA_NA_NA;KM193364_Microperforates_Globigerinita_uvula_NA_NA_NA;AF387173_Microperforates_Globigerinita_uvula_II_NA_NA;KM194324_Microperforates_Globigerinita_uvula_NA_NA_NA;	-	-	-	-	-
ISU659	1	2	NO	-	0	0	2	0	0	0	0	0	0	0	0	0	0	0	0	0	0	0	0	0	0	0	0	0	0	0	0	0	0	0	0	8	Non-Spiral_Galietelia_vivans_NA_NA_NA	Non-Spiral	Galietelia	vivans	NA	NAAB364519_Non-Spiral_Galietelia_vivans_NA_NA_NA;AB364517_Non-Spiral_Galietelia_vivans_NA_NA_NA;AB364518_Non-Spiral_Galietelia_vivans_NA_NA_NA;	-	-	-	-	-
ISU66	2	4	Yes	R-672_2_4_1	0	0	0	0	0	0	0	0	0	0	2	0	0	0	0	0	0	0	0	0	0	0	0	0	0	2	0	0	0	0	0	1	Non-Spinose_Neogloboquadrina_pachyderma_I_NA_NA	Non-Spinose	Neogloboquadrina	pachyderma	I	NAAY305329_Non-Spinose_Neogloboquadrina_pachyderma_I_NA_NA;	Non-Spinose	Neogloboquadrina	pachyderma	I	Non-Spinose_Neogloboquadrina_pachyderma_I
ISU660	1	19	Yes	R-335_1_19_2	0	19	0	0	0	0	0	0	0	0	0	0	0	0	0	0	0	0	0	0	0	0	0	0	0	0	0	0	0	0	0	2	Non-Spinose_Neogloboquadrina_pachyderma_VII_NA_NA	Non-Spinose	Neogloboquadrina	pachyderma	VII	NAKM193488_Non-Spinose_Neogloboquadrina_pachyderma_VII_NA_NA;KM193499_Non-Spinose_Neogloboquadrina_pachyderma_VII_NA_NA;KM193277_Non-Spinose_Neogloboquadrina_pachyderma_VII_NA_NA;KM193200_Non-Spinose_Neogloboquadrina_pachyderma_VII_NA_NA;EF447103_Non-Spinose_Neogloboquadrina_pachyderma_VII_NA_NA;AY453137_Non-Spinose_Neogloboquadrina_pachyderma_VII_NA_NA;KM193153_Non-Spinose_Neogloboquadrina_pachy…	Non-Spinose	Neogloboquadrina	pachyderma	U5	Non-Spinose_Neogloboquadrina_pachyderma_U5
ISU661	1	4	NO	-	0	0	0	0	0	0	0	0	0	0	0	0	0	0	0	0	0	0	0	0	0	0	0	0	0	0	0	0	4	0	0	1	Non-Spinose_Neogloboquadrina_pachyderma_IV_NA_NA	Non-Spinose	Neogloboquadrina	pachyderma	IV	NAKM193680_Non-Spinose_Neogloboquadrina_pachyderma_IV_NA_NA;	-	-	-	-	-
ISU662	1	2	NO	-	0	0	0	0	0	0	0	0	0	0	0	0	0	2	0	0	0	0	0	0	0	0	0	0	0	0	0	0	0	0	0	6	Spinose_Globigerina_bulloides_II	Spinose	Globigerina	bulloides	II	KM193333_Spinose_Globigerina_bulloides_II_a_NA;AF250106_Spinose_Globigerina_bulloides_II_d_NA;KM193474_Spinose_Globigerina_bulloides_II_b_NA;GQ293069_Spinose_Globigerina_bulloides_II_f_NA;KM193709_Spinose_Globigerina_bulloides_II_c_NA;KM193700_Spinose_Globigerina_bulloides_II_a_NA;AF250111_Spinose_Globigerina_bulloides_II_c_NA;KM193605_Spinose_Globigerina_bulloides_II_a_NA	-	-	-	-	-
ISU663	1	2	NO	-	0	0	0	0	0	0	0	0	0	0	0	0	0	0	0	0	0	0	0	0	0	0	0	0	0	0	0	0	2	0	0	1	Non-Spinose_Neogloboquadrina_pachyderma_IV_NA_NA	Non-Spinose	Neogloboquadrina	pachyderma	IV	NAKM193550_Non-Spinose_Neogloboquadrina_pachyderma_IV_NA_NA;KM193530_Non-Spinose_Neogloboquadrina_pachyderma_IV_NA_NA;KM193284_Non-Spinose_Neogloboquadrina_pachyderma_IV_NA_NA;KM193861_Non-Spinose_Neogloboquadrina_pachyderma_IV_NA_NA;KM193614_Non-Spinose_Neogloboquadrina_pachyderma_IV_NA_NA;KM193889_Non-Spinose_Neogloboquadrina_pachyderma_IV_NA_NA;KM193556_Non-Spinose_Neogloboquadrina_pachyderma_…	-	-	-	-	-
ISU664	1	2	NO	-	0	0	0	0	0	0	0	0	0	0	0	0	0	0	0	0	0	0	0	2	0	0	0	0	0	0	0	0	0	0	0	2	Microperforates_Globigerinita_glutinata	Microperforates	Globigerinita	glutinata	-	JQ799900_Microperforates_Globigerinita_glutinata_IV_NA_NA;FJ643288_Microperforates_Globigerinita_glutinata_I_NA_NA;KM193539_Microperforates_Globigerinita_glutinata_NA_NA_NA;FJ643296_Microperforates_Globigerinita_glutinata_III_NA_NA;FJ643277_Microperforates_Globigerinita_glutinata_III_NA_NA;KM193303_Microperforates_Globigerinita_glutinata_NA_NA_NA;KM193199_Microperforates_Globigerinita_glutinata_N…	-	-	-	-	-
ISU665	2	6	Yes	R-579_2_6_1	0	2	0	0	0	0	0	0	0	0	0	0	0	0	0	0	0	0	0	0	0	0	0	0	0	4	0	0	0	0	0	1	Non-Spinose_Neogloboquadrina_pachyderma_I_NA_NA	Non-Spinose	Neogloboquadrina	pachyderma	I	NAAY305329_Non-Spinose_Neogloboquadrina_pachyderma_I_NA_NA;	Non-Spinose	Neogloboquadrina	pachyderma	I	Non-Spinose_Neogloboquadrina_pachyderma_I
ISU666	3	7	Yes	R-544_3_7_4	0	0	0	2	0	3	0	0	0	0	0	0	0	0	0	0	0	0	0	0	0	2	0	0	0	0	0	0	0	0	0	4	Microperforates_Globigerinita_glutinata	Microperforates	Globigerinita	glutinata	-	FJ643286_Microperforates_Globigerinita_glutinata_I_NA_NA;KM193484_Microperforates_Globigerinita_glutinata_NA_NA_NA	Microperforates	Globigerinita	glutinata	I	Microperforates_Globigerinita_glutinata_I
ISU667	1	2	NO	-	0	0	0	0	0	0	0	0	0	0	0	2	0	0	0	0	0	0	0	0	0	0	0	0	0	0	0	0	0	0	0	2	Non-Spinose_Neogloboquadrina_pachyderma_I_NA_NA	Non-Spinose	Neogloboquadrina	pachyderma	I	NAAY305329_Non-Spinose_Neogloboquadrina_pachyderma_I_NA_NA;	-	-	-	-	-
ISU668	3	13	Yes	R-410_3_13_4	0	0	0	0	0	3	0	0	0	0	0	0	0	0	0	0	0	0	0	5	0	5	0	0	0	0	0	0	0	0	0	4	Microperforates_Globigerinita_glutinata	Microperforates	Globigerinita	glutinata	-	FJ643286_Microperforates_Globigerinita_glutinata_I_NA_NA;KM193484_Microperforates_Globigerinita_glutinata_NA_NA_NA	Microperforates	Globigerinita	glutinata	III	Microperforates_Globigerinita_glutinata_III
ISU669	2	222	Yes	R-70_2_222_9	0	0	0	220	0	0	0	0	0	0	0	0	0	0	0	0	0	0	0	0	0	0	0	0	2	0	0	0	0	0	0	9	Microperforates_Globigerinita_glutinata	Microperforates	Globigerinita	glutinata	-	AB468829_Microperforates_Globigerinita_glutinata_II_NA_NA;KM194025_Microperforates_Globigerinita_glutinata_NA_NA_NA;AB468827_Microperforates_Globigerinita_glutinata_II_NA_NA;FJ643418_Microperforates_Globigerinita_glutinata_NA_NA_NA;AB468826_Microperforates_Globigerinita_glutinata_II_NA_NA;AB468833_Microperforates_Globigerinita_glutinata_II_NA_NA	Microperforates	Globigerinita	glutinata	III	Microperforates_Globigerinita_glutinata_III
ISU67	1	4	NO	-	0	0	0	0	0	0	0	0	0	0	0	0	4	0	0	0	0	0	0	0	0	0	0	0	0	0	0	0	0	0	0	2	Spinose_Globigerina_bulloides_II_c_NA	Spinose	Globigerina	bulloides	II	cKM193709_Spinose_Globigerina_bulloides_II_c_NA;AF250111_Spinose_Globigerina_bulloides_II_c_NA	-	-	-	-	-
ISU670	1	4	NO	-	4	0	0	0	0	0	0	0	0	0	0	0	0	0	0	0	0	0	0	0	0	0	0	0	0	0	0	0	0	0	0	1	Microperforates_Globigerinita_uvula	Microperforates	Globigerinita	uvula	-	KM193181_Microperforates_Globigerinita_uvula_NA_NA_NA;KM193691_Microperforates_Globigerinita_uvula_NA_NA_NA;KM193364_Microperforates_Globigerinita_uvula_NA_NA_NA;AF387173_Microperforates_Globigerinita_uvula_II_NA_NA;KM194324_Microperforates_Globigerinita_uvula_NA_NA_NA;	-	-	-	-	-
ISU671	2	5	Yes	R-614_2_5_1	0	0	0	0	0	2	0	0	0	0	0	0	0	0	0	0	0	0	0	3	0	0	0	0	0	0	0	0	0	0	0	1	Microperforates_Candeina_nitida_NA_NA_NA	Microperforates	Candeina	nitida	NA	NAAB263435_Microperforates_Candeina_nitida_NA_NA_NA;	Microperforates	Globigerinita	glutinata	I	Microperforates_Globigerinita_glutinata_I
ISU672	1	3	NO	-	0	0	0	0	0	0	0	0	0	0	0	0	0	0	0	0	0	0	0	0	0	3	0	0	0	0	0	0	0	0	0	1	Spinose_Globigerina_bulloides	Spinose	Globigerina	bulloides	-	GQ293072_Spinose_Globigerina_bulloides_I_c_NA;GU060421_Spinose_Globigerina_bulloides_I_e_NA;GQ293070_Spinose_Globigerina_bulloides_I_d_NA;Z83957_Spinose_Globigerina_bulloides_NA_NA_NA	-	-	-	-	-
ISU673	1	5	NO	-	0	0	0	0	0	5	0	0	0	0	0	0	0	0	0	0	0	0	0	0	0	0	0	0	0	0	0	0	0	0	0	4	Microperforates_Globigerinita_glutinata	Microperforates	Globigerinita	glutinata	-	FJ643286_Microperforates_Globigerinita_glutinata_I_NA_NA;KM193484_Microperforates_Globigerinita_glutinata_NA_NA_NA	-	-	-	-	-
ISU674	1	70	Yes	R-152_1_70_7	0	0	0	70	0	0	0	0	0	0	0	0	0	0	0	0	0	0	0	0	0	0	0	0	0	0	0	0	0	0	0	7	Microperforates_Globigerinita_uvula	Microperforates	Globigerinita	uvula	-	FJ643298_Microperforates_Globigerinita_uvula_I_NA_NA;KM193070_Microperforates_Globigerinita_uvula_NA_NA_NA;KM193079_Microperforates_Globigerinita_uvula_NA_NA_NA;	Microperforates	Globigerinita	uvula	U1	Microperforates_Globigerinita_uvula_U1
ISU675	1	2	NO	-	0	0	0	0	0	2	0	0	0	0	0	0	0	0	0	0	0	0	0	0	0	0	0	0	0	0	0	0	0	0	0	6	Microperforates_Globigerinita_uvula	Microperforates	Globigerinita	uvula	-	FJ643298_Microperforates_Globigerinita_uvula_I_NA_NA;KM193079_Microperforates_Globigerinita_uvula_NA_NA_NA;KM193070_Microperforates_Globigerinita_uvula_NA_NA_NA;	-	-	-	-	-
ISU676	1	20	Yes	R-328_1_20_2	0	0	0	0	0	0	0	0	0	0	0	0	0	0	0	0	0	0	0	0	0	0	0	0	0	20	0	0	0	0	0	2	Non-Spinose_Neogloboquadrina_pachyderma_I_NA_NA	Non-Spinose	Neogloboquadrina	pachyderma	I	NAAY305329_Non-Spinose_Neogloboquadrina_pachyderma_I_NA_NA;	Non-Spinose	Neogloboquadrina	pachyderma	U1	Non-Spinose_Neogloboquadrina_pachyderma_U1
ISU677	1	6	NO	-	0	0	0	0	0	0	0	0	0	0	0	0	0	0	0	0	0	0	0	0	0	0	0	0	0	0	0	0	6	0	0	1	Non-Spinose_Neogloboquadrina_pachyderma_IV_NA_NA	Non-Spinose	Neogloboquadrina	pachyderma	IV	NAKM193680_Non-Spinose_Neogloboquadrina_pachyderma_IV_NA_NA;	-	-	-	-	-
ISU678	1	2	NO	-	0	0	0	0	0	0	0	0	0	0	0	2	0	0	0	0	0	0	0	0	0	0	0	0	0	0	0	0	0	0	0	1	Non-Spinose_Neogloboquadrina_pachyderma_I_NA_NA	Non-Spinose	Neogloboquadrina	pachyderma	I	NAAY305329_Non-Spinose_Neogloboquadrina_pachyderma_I_NA_NA;	-	-	-	-	-
ISU679	1	2	NO	-	2	0	0	0	0	0	0	0	0	0	0	0	0	0	0	0	0	0	0	0	0	0	0	0	0	0	0	0	0	0	0	1	Microperforates_Globigerinita_uvula	Microperforates	Globigerinita	uvula	-	KM193181_Microperforates_Globigerinita_uvula_NA_NA_NA;KM193691_Microperforates_Globigerinita_uvula_NA_NA_NA;KM193364_Microperforates_Globigerinita_uvula_NA_NA_NA;AF387173_Microperforates_Globigerinita_uvula_II_NA_NA;KM194324_Microperforates_Globigerinita_uvula_NA_NA_NA;	-	-	-	-	-
ISU68	2	14	Yes	R-398_2_14_5	0	0	0	0	0	0	0	0	0	0	0	0	0	0	0	0	0	0	0	9	0	5	0	0	0	0	0	0	0	0	0	5	Microperforates_Globigerinita_glutinata	Microperforates	Globigerinita	glutinata	-	JQ799900_Microperforates_Globigerinita_glutinata_IV_NA_NA;FJ643288_Microperforates_Globigerinita_glutinata_I_NA_NA;KM193539_Microperforates_Globigerinita_glutinata_NA_NA_NA;FJ643296_Microperforates_Globigerinita_glutinata_III_NA_NA;FJ643277_Microperforates_Globigerinita_glutinata_III_NA_NA;KM193303_Microperforates_Globigerinita_glutinata_NA_NA_NA;KM193199_Microperforates_Globigerinita_glutinata_N…	Microperforates	Globigerinita	glutinata	I	Microperforates_Globigerinita_glutinata_I
[truncated: 354 more rows]

## Sheet: Fields explainations
Field	Definition	Possible content - Remarks
Ribotype information	All information linked to the environmental sequences
ISU	Sequence Identifier	The sequences are provided in Supplementary Information 1
NumSamples	Number of samples in which the sequence occur
TotalReads	Total number of reads
Retained as e-ribotype	Indicate if the sequence has been retained for ecological inference (See text for details)	YES/NO
[truncated: 47 more rows]
